# Supplementary material for: A shotgun metagenomic investigation of the microbiota of udder cleft dermatitis in comparison to healthy skin in dairy cows
Source: PLoS One. 2020 Dec 2;15(12):e0242880. doi: 10.1371/journal.pone.0242880 (PMC7710049; doi:10.1371/journal.pone.0242880)
Supplement: S2 Table — The results of the classification of the sequenced reads (after removal of sequences assigned to the Bos Taurus genome) presented in an Excel table as both clade read counts and normalized into a percentage of classified reads for each taxa. (XLSX) [file pone.0242880.s002.xlsx]

## Sheet: kraken2
Taxon (long)	rank code	NCBI taxonomy ID	Domain	Taxon	C1	C2	C3	C4	C5	C6	C7	C8	C9	C10	C11	C12	C13	M1	M2	M3	M4	M5	M6	M7	M8	M9	M10	M11	M12	M13	M14	M15	M16	M17	S1	S2	S3	S4	S5	S6	S7	S8	S9	S10	S11	S12	S13	S14	S15
root	R	1	root	root	3002124	3110374	3418601	2720813	2587028	3323809	5983413	2495900	2423708	1631707	4065727	8504906	2366132	2419228	2402095	6270199	1742115	7605534	3981842	6678235	11617108	4082221	10498471	9558851	7336140	4599993	7330610	2939913	4975105	5034818	4238277	3801280	2794649	6061720	8345111	13964057	4465054	504108	3162961	9596248	11209329	8745033	5996449	529700	3536614
root|Viruses	D	10239	Viruses	Viruses	3966	4317	4132	3019	3574	4152	4982	2809	1954	1858	3478	26214	2387	3599	1612	38259	2623	7623	5790	4820	1320	6642	3566	3870	3036	2179	11439	2703	3351	3852	2741	3911	2467	4479	4242	4314	3977	452	2820	5400	3037	6097	2933	490	2130
root|Viruses|Alphasatellitidae	F	1458186	Viruses	Alphasatellitidae	0	0	0	0	0	0	0	0	0	0	0	0	0	2	0	0	0	0	1	0	0	0	0	0	0	0	0	0	1	0	0	0	1	0	0	0	1	0	0	0	0	0	0	0	0
root|Viruses|Alphasatellitidae|Geminialphasatellitinae	F1	283494	Viruses	Geminialphasatellitinae	0	0	0	0	0	0	0	0	0	0	0	0	0	2	0	0	0	0	0	0	0	0	0	0	0	0	0	0	0	0	0	0	1	0	0	0	0	0	0	0	0	0	0	0	0
root|Viruses|Alphasatellitidae|Geminialphasatellitinae|Colecusatellite	G	2169619	Viruses	Colecusatellite	0	0	0	0	0	0	0	0	0	0	0	0	0	2	0	0	0	0	0	0	0	0	0	0	0	0	0	0	0	0	0	0	0	0	0	0	0	0	0	0	0	0	0	0	0
root|Viruses|Alphasatellitidae|Geminialphasatellitinae|Colecusatellite|Cotton leaf curl Lucknow alphasatellite	S	2169841	Viruses	Cotton leaf curl Lucknow alphasatellite	0	0	0	0	0	0	0	0	0	0	0	0	0	2	0	0	0	0	0	0	0	0	0	0	0	0	0	0	0	0	0	0	0	0	0	0	0	0	0	0	0	0	0	0	0
root|Viruses|Alphasatellitidae|Nanoalphasatellitinae	F1	1441744	Viruses	Nanoalphasatellitinae	0	0	0	0	0	0	0	0	0	0	0	0	0	0	0	0	0	0	1	0	0	0	0	0	0	0	0	0	1	0	0	0	0	0	0	0	1	0	0	0	0	0	0	0	0
root|Viruses|Alphasatellitidae|Nanoalphasatellitinae|Clostunsatellite	G	2169627	Viruses	Clostunsatellite	0	0	0	0	0	0	0	0	0	0	0	0	0	0	0	0	0	0	0	0	0	0	0	0	0	0	0	0	1	0	0	0	0	0	0	0	0	0	0	0	0	0	0	0	0
root|Viruses|Alphasatellitidae|Nanoalphasatellitinae|Clostunsatellite|Subterranean clover stunt alphasatellite 2	S	2169838	Viruses	Subterranean clover stunt alphasatellite 2	0	0	0	0	0	0	0	0	0	0	0	0	0	0	0	0	0	0	0	0	0	0	0	0	0	0	0	0	1	0	0	0	0	0	0	0	0	0	0	0	0	0	0	0	0
root|Viruses|Alphasatellitidae|Nanoalphasatellitinae|Clostunsatellite|Subterranean clover stunt alphasatellite 2|Subterranean clover stunt C6 alphasatellite	S1	1458459	Viruses	Subterranean clover stunt C6 alphasatellite	0	0	0	0	0	0	0	0	0	0	0	0	0	0	0	0	0	0	0	0	0	0	0	0	0	0	0	0	1	0	0	0	0	0	0	0	0	0	0	0	0	0	0	0	0
root|Viruses|Alphasatellitidae|Nanoalphasatellitinae|Milvetsatellite	G	2169629	Viruses	Milvetsatellite	0	0	0	0	0	0	0	0	0	0	0	0	0	0	0	0	0	0	1	0	0	0	0	0	0	0	0	0	0	0	0	0	0	0	0	0	0	0	0	0	0	0	0	0	0
root|Viruses|Alphasatellitidae|Nanoalphasatellitinae|Milvetsatellite|Milk vetch dwarf alphasatellite 3	S	2170027	Viruses	Milk vetch dwarf alphasatellite 3	0	0	0	0	0	0	0	0	0	0	0	0	0	0	0	0	0	0	1	0	0	0	0	0	0	0	0	0	0	0	0	0	0	0	0	0	0	0	0	0	0	0	0	0	0
root|Viruses|Alphasatellitidae|Nanoalphasatellitinae|Milvetsatellite|Milk vetch dwarf alphasatellite 3|Milk vetch dwarf C10 alphasatellite	S1	1455652	Viruses	Milk vetch dwarf C10 alphasatellite	0	0	0	0	0	0	0	0	0	0	0	0	0	0	0	0	0	0	1	0	0	0	0	0	0	0	0	0	0	0	0	0	0	0	0	0	0	0	0	0	0	0	0	0	0
root|Viruses|Alphasatellitidae|Nanoalphasatellitinae|unclassified Nanoalphasatellitinae	F2	2683341	Viruses	unclassified Nanoalphasatellitinae	0	0	0	0	0	0	0	0	0	0	0	0	0	0	0	0	0	0	0	0	0	0	0	0	0	0	0	0	0	0	0	0	0	0	0	0	1	0	0	0	0	0	0	0	0
root|Viruses|Alphasatellitidae|Nanoalphasatellitinae|unclassified Nanoalphasatellitinae|Faba bean necrotic stunt alphasatellite 1	S	1441799	Viruses	Faba bean necrotic stunt alphasatellite 1	0	0	0	0	0	0	0	0	0	0	0	0	0	0	0	0	0	0	0	0	0	0	0	0	0	0	0	0	0	0	0	0	0	0	0	0	1	0	0	0	0	0	0	0	0
root|Viruses|Ampullaviridae	F	573053	Viruses	Ampullaviridae	0	0	0	5	0	0	0	0	0	2	0	0	1	0	0	0	2	0	0	0	0	0	0	0	0	0	1	0	0	0	0	0	0	0	0	0	0	0	0	0	0	0	0	0	1
root|Viruses|Ampullaviridae|Ampullavirus	G	573054	Viruses	Ampullavirus	0	0	0	5	0	0	0	0	0	2	0	0	1	0	0	0	2	0	0	0	0	0	0	0	0	0	1	0	0	0	0	0	0	0	0	0	0	0	0	0	0	0	0	0	1
root|Viruses|Ampullaviridae|Ampullavirus|Acidianus bottle-shaped virus	S	437444	Viruses	Acidianus bottle-shaped virus	0	0	0	4	0	0	0	0	0	0	0	0	0	0	0	0	0	0	0	0	0	0	0	0	0	0	1	0	0	0	0	0	0	0	0	0	0	0	0	0	0	0	0	0	1
root|Viruses|Ampullaviridae|Ampullavirus|unclassified Ampullavirus	G1	1732172	Viruses	unclassified Ampullavirus	0	0	0	1	0	0	0	0	0	2	0	0	1	0	0	0	2	0	0	0	0	0	0	0	0	0	0	0	0	0	0	0	0	0	0	0	0	0	0	0	0	0	0	0	0
root|Viruses|Ampullaviridae|Ampullavirus|unclassified Ampullavirus|Acidianus bottle-shaped virus 2	S	1732173	Viruses	Acidianus bottle-shaped virus 2	0	0	0	1	0	0	0	0	0	0	0	0	1	0	0	0	2	0	0	0	0	0	0	0	0	0	0	0	0	0	0	0	0	0	0	0	0	0	0	0	0	0	0	0	0
root|Viruses|Ampullaviridae|Ampullavirus|unclassified Ampullavirus|Acidianus bottle-shaped virus 3	S	1732174	Viruses	Acidianus bottle-shaped virus 3	0	0	0	0	0	0	0	0	0	2	0	0	0	0	0	0	0	0	0	0	0	0	0	0	0	0	0	0	0	0	0	0	0	0	0	0	0	0	0	0	0	0	0	0	0
root|Viruses|Anelloviridae	F	687329	Viruses	Anelloviridae	2	3	3	1	7	1	1	1	0	1	3	2	1	2	0	9	2	9	5	1	0	0	1	0	6	1	0	0	1	0	0	3	5	3	1	0	0	0	0	0	0	1	0	0	0
root|Viruses|Anelloviridae|Alphatorquevirus	G	687331	Viruses	Alphatorquevirus	0	1	1	0	1	0	0	0	0	1	2	0	0	1	0	0	0	0	1	1	0	0	0	0	0	1	0	0	0	0	0	0	3	0	0	0	0	0	0	0	0	0	0	0	0
root|Viruses|Anelloviridae|Alphatorquevirus|Torque teno virus 1	S	687340	Viruses	Torque teno virus 1	0	0	1	0	0	0	0	0	0	0	0	0	0	0	0	0	0	0	0	0	0	0	0	0	0	0	0	0	0	0	0	0	0	0	0	0	0	0	0	0	0	0	0	0	0
root|Viruses|Anelloviridae|Alphatorquevirus|Torque teno virus 12	S	687351	Viruses	Torque teno virus 12	0	1	0	0	0	0	0	0	0	0	0	0	0	0	0	0	0	0	0	0	0	0	0	0	0	0	0	0	0	0	0	0	0	0	0	0	0	0	0	0	0	0	0	0	0
root|Viruses|Anelloviridae|Alphatorquevirus|Torque teno virus 18	S	687357	Viruses	Torque teno virus 18	0	0	0	0	0	0	0	0	0	1	0	0	0	0	0	0	0	0	0	1	0	0	0	0	0	0	0	0	0	0	0	0	0	0	0	0	0	0	0	0	0	0	0	0	0
root|Viruses|Anelloviridae|Alphatorquevirus|Torque teno virus 21	S	687360	Viruses	Torque teno virus 21	0	0	0	0	0	0	0	0	0	0	0	0	0	0	0	0	0	0	0	0	0	0	0	0	0	0	0	0	0	0	0	0	3	0	0	0	0	0	0	0	0	0	0	0	0
root|Viruses|Anelloviridae|Alphatorquevirus|Torque teno virus 7	S	687346	Viruses	Torque teno virus 7	0	0	0	0	0	0	0	0	0	0	2	0	0	0	0	0	0	0	0	0	0	0	0	0	0	1	0	0	0	0	0	0	0	0	0	0	0	0	0	0	0	0	0	0	0
root|Viruses|Anelloviridae|Alphatorquevirus|unclassified Alphatorquevirus	G1	1619215	Viruses	unclassified Alphatorquevirus	0	0	0	0	1	0	0	0	0	0	0	0	0	1	0	0	0	0	1	0	0	0	0	0	0	0	0	0	0	0	0	0	0	0	0	0	0	0	0	0	0	0	0	0	0
root|Viruses|Anelloviridae|Alphatorquevirus|unclassified Alphatorquevirus|Simian torque teno virus 31	S	1619219	Viruses	Simian torque teno virus 31	0	0	0	0	0	0	0	0	0	0	0	0	0	0	0	0	0	0	1	0	0	0	0	0	0	0	0	0	0	0	0	0	0	0	0	0	0	0	0	0	0	0	0	0	0
root|Viruses|Anelloviridae|Alphatorquevirus|unclassified Alphatorquevirus|Simian torque teno virus 32	S	1619220	Viruses	Simian torque teno virus 32	0	0	0	0	1	0	0	0	0	0	0	0	0	0	0	0	0	0	0	0	0	0	0	0	0	0	0	0	0	0	0	0	0	0	0	0	0	0	0	0	0	0	0	0	0
root|Viruses|Anelloviridae|Alphatorquevirus|unclassified Alphatorquevirus|Simian torque teno virus 34	S	1629657	Viruses	Simian torque teno virus 34	0	0	0	0	0	0	0	0	0	0	0	0	0	1	0	0	0	0	0	0	0	0	0	0	0	0	0	0	0	0	0	0	0	0	0	0	0	0	0	0	0	0	0	0	0
root|Viruses|Anelloviridae|Betatorquevirus	G	687332	Viruses	Betatorquevirus	0	1	2	0	4	0	1	0	0	0	1	1	1	0	0	9	2	7	3	0	0	0	0	0	0	0	0	0	0	0	0	2	2	3	1	0	0	0	0	0	0	0	0	0	0
root|Viruses|Anelloviridae|Betatorquevirus|Torque teno mini virus 3	S	687371	Viruses	Torque teno mini virus 3	0	0	2	0	4	0	1	0	0	0	0	1	1	0	0	9	2	7	3	0	0	0	0	0	0	0	0	0	0	0	0	0	1	0	1	0	0	0	0	0	0	0	0	0	0
root|Viruses|Anelloviridae|Betatorquevirus|Torque teno mini virus 7	S	687375	Viruses	Torque teno mini virus 7	0	0	0	0	0	0	0	0	0	0	0	0	0	0	0	0	0	0	0	0	0	0	0	0	0	0	0	0	0	0	0	2	1	3	0	0	0	0	0	0	0	0	0	0	0
root|Viruses|Anelloviridae|Betatorquevirus|Torque teno mini virus 8	S	687376	Viruses	Torque teno mini virus 8	0	1	0	0	0	0	0	0	0	0	0	0	0	0	0	0	0	0	0	0	0	0	0	0	0	0	0	0	0	0	0	0	0	0	0	0	0	0	0	0	0	0	0	0	0
root|Viruses|Anelloviridae|Betatorquevirus|unclassified Betatorquevirus	G1	1535289	Viruses	unclassified Betatorquevirus	0	0	0	0	0	0	0	0	0	0	1	0	0	0	0	0	0	0	0	0	0	0	0	0	0	0	0	0	0	0	0	0	0	0	0	0	0	0	0	0	0	0	0	0	0
root|Viruses|Anelloviridae|Betatorquevirus|unclassified Betatorquevirus|Torque teno mini virus ALA22	S	1535290	Viruses	Torque teno mini virus ALA22	0	0	0	0	0	0	0	0	0	0	1	0	0	0	0	0	0	0	0	0	0	0	0	0	0	0	0	0	0	0	0	0	0	0	0	0	0	0	0	0	0	0	0	0	0
root|Viruses|Anelloviridae|Gammatorquevirus	G	687333	Viruses	Gammatorquevirus	2	1	0	0	0	0	0	0	0	0	0	1	0	1	0	0	0	0	0	0	0	0	0	0	0	0	0	0	0	0	0	0	0	0	0	0	0	0	0	0	0	1	0	0	0
root|Viruses|Anelloviridae|Gammatorquevirus|Torque teno midi virus 13	S	2065054	Viruses	Torque teno midi virus 13	0	0	0	0	0	0	0	0	0	0	0	1	0	0	0	0	0	0	0	0	0	0	0	0	0	0	0	0	0	0	0	0	0	0	0	0	0	0	0	0	0	0	0	0	0
root|Viruses|Anelloviridae|Gammatorquevirus|Torque teno midi virus 3	S	2065044	Viruses	Torque teno midi virus 3	0	0	0	0	0	0	0	0	0	0	0	0	0	0	0	0	0	0	0	0	0	0	0	0	0	0	0	0	0	0	0	0	0	0	0	0	0	0	0	0	0	1	0	0	0
root|Viruses|Anelloviridae|Gammatorquevirus|Torque teno midi virus 9	S	2065050	Viruses	Torque teno midi virus 9	2	1	0	0	0	0	0	0	0	0	0	0	0	1	0	0	0	0	0	0	0	0	0	0	0	0	0	0	0	0	0	0	0	0	0	0	0	0	0	0	0	0	0	0	0
root|Viruses|Anelloviridae|Iotatorquevirus	G	687339	Viruses	Iotatorquevirus	0	0	0	1	0	0	0	0	0	0	0	0	0	0	0	0	0	0	0	0	0	0	0	0	0	0	0	0	0	0	0	0	0	0	0	0	0	0	0	0	0	0	0	0	0
root|Viruses|Anelloviridae|Iotatorquevirus|Torque teno sus virus 1b	S	687387	Viruses	Torque teno sus virus 1b	0	0	0	1	0	0	0	0	0	0	0	0	0	0	0	0	0	0	0	0	0	0	0	0	0	0	0	0	0	0	0	0	0	0	0	0	0	0	0	0	0	0	0	0	0
root|Viruses|Anelloviridae|Kappatorquevirus	G	1218487	Viruses	Kappatorquevirus	0	0	0	0	1	0	0	0	0	0	0	0	0	0	0	0	0	1	0	0	0	0	0	0	0	0	0	0	0	0	0	0	0	0	0	0	0	0	0	0	0	0	0	0	0
root|Viruses|Anelloviridae|Kappatorquevirus|Torque teno sus virus k2b	S	1239832	Viruses	Torque teno sus virus k2b	0	0	0	0	1	0	0	0	0	0	0	0	0	0	0	0	0	1	0	0	0	0	0	0	0	0	0	0	0	0	0	0	0	0	0	0	0	0	0	0	0	0	0	0	0
root|Viruses|Anelloviridae|Zetatorquevirus	G	687336	Viruses	Zetatorquevirus	0	0	0	0	0	0	0	1	0	0	0	0	0	0	0	0	0	0	0	0	0	0	1	0	6	0	0	0	0	0	0	0	0	0	0	0	0	0	0	0	0	0	0	0	0
root|Viruses|Anelloviridae|Zetatorquevirus|Torque teno douroucouli virus	S	687383	Viruses	Torque teno douroucouli virus	0	0	0	0	0	0	0	1	0	0	0	0	0	0	0	0	0	0	0	0	0	0	1	0	6	0	0	0	0	0	0	0	0	0	0	0	0	0	0	0	0	0	0	0	0
root|Viruses|Anelloviridae|unclassified Anelloviridae	F1	363628	Viruses	unclassified Anelloviridae	0	0	0	0	1	1	0	0	0	0	0	0	0	0	0	0	0	1	1	0	0	0	0	0	0	0	0	0	1	0	0	1	0	0	0	0	0	0	0	0	0	0	0	0	0
root|Viruses|Anelloviridae|unclassified Anelloviridae|Rodent Torque teno virus 2	S	1514665	Viruses	Rodent Torque teno virus 2	0	0	0	0	0	1	0	0	0	0	0	0	0	0	0	0	0	1	1	0	0	0	0	0	0	0	0	0	1	0	0	0	0	0	0	0	0	0	0	0	0	0	0	0	0
root|Viruses|Anelloviridae|unclassified Anelloviridae|Small anellovirus	S	393049	Viruses	Small anellovirus	0	0	0	0	0	0	0	0	0	0	0	0	0	0	0	0	0	0	0	0	0	0	0	0	0	0	0	0	0	0	0	1	0	0	0	0	0	0	0	0	0	0	0	0	0
root|Viruses|Anelloviridae|unclassified Anelloviridae|Small anellovirus|Small anellovirus 2	S1	289367	Viruses	Small anellovirus 2	0	0	0	0	0	0	0	0	0	0	0	0	0	0	0	0	0	0	0	0	0	0	0	0	0	0	0	0	0	0	0	1	0	0	0	0	0	0	0	0	0	0	0	0	0
root|Viruses|Anelloviridae|unclassified Anelloviridae|Torque teno indri virus 1	S	2010248	Viruses	Torque teno indri virus 1	0	0	0	0	1	0	0	0	0	0	0	0	0	0	0	0	0	0	0	0	0	0	0	0	0	0	0	0	0	0	0	0	0	0	0	0	0	0	0	0	0	0	0	0	0
root|Viruses|Baculoviridae	F	10442	Viruses	Baculoviridae	116	116	129	96	128	71	111	85	31	35	86	51	37	86	30	327	125	165	269	65	27	35	95	146	53	55	49	56	132	363	34	62	45	107	32	15	62	8	21	46	207	90	177	17	33
root|Viruses|Baculoviridae|Alphabaculovirus	G	558016	Viruses	Alphabaculovirus	94	97	108	80	102	51	72	62	26	26	77	37	28	61	28	314	101	144	234	53	8	30	20	22	26	44	40	43	121	357	17	42	26	75	27	7	46	8	17	36	206	68	176	12	27
root|Viruses|Baculoviridae|Alphabaculovirus|Adoxophyes honmai nucleopolyhedrovirus	S	224399	Viruses	Adoxophyes honmai nucleopolyhedrovirus	1	0	0	1	1	1	0	1	0	0	0	0	0	0	0	0	0	1	0	0	0	0	0	1	0	0	0	0	0	0	0	0	0	1	6	2	0	0	0	0	0	0	2	0	0
root|Viruses|Baculoviridae|Alphabaculovirus|Agrotis ipsilon multiple nucleopolyhedrovirus	S	208013	Viruses	Agrotis ipsilon multiple nucleopolyhedrovirus	10	19	26	6	10	2	5	7	1	5	4	3	2	2	9	20	18	24	12	0	0	1	0	1	0	7	3	2	3	0	0	3	0	0	3	0	2	0	0	1	0	2	0	0	0
root|Viruses|Baculoviridae|Alphabaculovirus|Agrotis segetum nucleopolyhedrovirus A	S	1962501	Viruses	Agrotis segetum nucleopolyhedrovirus A	5	1	5	2	5	1	1	0	0	0	1	0	2	3	1	0	0	1	0	0	0	1	0	0	0	1	4	0	1	0	0	1	3	7	0	0	1	0	1	0	2	1	0	1	3
root|Viruses|Baculoviridae|Alphabaculovirus|Agrotis segetum nucleopolyhedrovirus B	S	1580580	Viruses	Agrotis segetum nucleopolyhedrovirus B	5	6	10	5	3	4	5	3	1	2	5	4	1	6	0	6	3	11	34	0	0	1	0	0	1	1	3	0	7	4	2	1	0	0	1	0	1	0	0	3	0	1	0	1	0
root|Viruses|Baculoviridae|Alphabaculovirus|Antheraea pernyi nucleopolyhedrovirus	S	161494	Viruses	Antheraea pernyi nucleopolyhedrovirus	0	0	2	1	0	1	9	2	1	1	3	0	1	0	2	0	1	2	1	0	0	1	1	2	0	1	2	1	1	0	0	0	0	0	0	0	0	0	0	1	1	0	0	0	0
root|Viruses|Baculoviridae|Alphabaculovirus|Anticarsia gemmatalis multiple nucleopolyhedrovirus	S	268591	Viruses	Anticarsia gemmatalis multiple nucleopolyhedrovirus	0	0	0	0	0	0	0	0	0	0	0	0	0	0	0	0	1	0	0	0	0	0	0	0	0	0	0	0	0	0	0	0	0	0	0	0	0	0	0	0	0	0	0	0	0
root|Viruses|Baculoviridae|Alphabaculovirus|Autographa californica multiple nucleopolyhedrovirus	S	307456	Viruses	Autographa californica multiple nucleopolyhedrovirus	0	0	0	0	0	0	1	1	0	1	0	0	0	0	0	0	1	1	2	0	0	0	0	0	0	1	0	1	0	0	0	0	0	0	0	0	0	0	0	0	0	0	0	0	0
root|Viruses|Baculoviridae|Alphabaculovirus|Autographa californica multiple nucleopolyhedrovirus|Autographa californica nucleopolyhedrovirus	S1	46015	Viruses	Autographa californica nucleopolyhedrovirus	0	0	0	0	0	0	1	1	0	1	0	0	0	0	0	0	1	1	2	0	0	0	0	0	0	1	0	1	0	0	0	0	0	0	0	0	0	0	0	0	0	0	0	0	0
root|Viruses|Baculoviridae|Alphabaculovirus|Bombyx mori nucleopolyhedrovirus	S	271108	Viruses	Bombyx mori nucleopolyhedrovirus	1	1	0	1	0	0	1	0	0	0	0	0	0	0	0	2	1	3	1	0	0	0	1	0	0	0	0	0	1	0	0	0	0	0	0	0	0	0	0	0	0	0	0	0	0
root|Viruses|Baculoviridae|Alphabaculovirus|Buzura suppressaria nucleopolyhedrovirus	S	74320	Viruses	Buzura suppressaria nucleopolyhedrovirus	0	0	0	1	0	0	0	0	0	1	1	0	0	0	0	0	1	0	0	1	0	0	0	0	1	0	0	3	2	2	0	0	0	0	0	0	1	0	0	0	0	0	0	0	0
root|Viruses|Baculoviridae|Alphabaculovirus|Catopsilia pomona nucleopolyhedrovirus	S	1850906	Viruses	Catopsilia pomona nucleopolyhedrovirus	3	6	3	1	9	1	1	0	0	1	1	1	0	0	2	11	8	3	33	0	0	2	1	0	1	0	1	0	0	0	0	1	1	0	0	1	0	0	0	0	0	43	1	1	0
root|Viruses|Baculoviridae|Alphabaculovirus|Choristoneura fumiferana DEF multiple nucleopolyhedrovirus	S	74660	Viruses	Choristoneura fumiferana DEF multiple nucleopolyhedrovirus	0	1	3	6	19	0	2	1	0	0	2	1	0	0	0	3	25	19	9	0	0	1	0	0	0	1	1	0	1	0	0	0	0	0	0	0	0	0	1	1	0	1	0	0	0
root|Viruses|Baculoviridae|Alphabaculovirus|Choristoneura fumiferana multiple nucleopolyhedrovirus	S	208973	Viruses	Choristoneura fumiferana multiple nucleopolyhedrovirus	0	0	0	1	0	0	3	0	0	0	2	0	1	0	0	0	1	2	2	0	0	3	2	0	0	0	0	0	0	0	0	0	0	0	0	0	0	0	0	0	1	0	0	0	0
root|Viruses|Baculoviridae|Alphabaculovirus|Choristoneura murinana nucleopolyhedrovirus	S	1987479	Viruses	Choristoneura murinana nucleopolyhedrovirus	0	0	0	0	0	0	0	0	0	0	0	0	0	0	0	2	0	2	1	0	0	1	0	0	0	0	0	0	0	0	0	0	0	0	3	0	0	0	0	0	0	0	0	0	0
root|Viruses|Baculoviridae|Alphabaculovirus|Choristoneura rosaceana nucleopolyhedrovirus	S	58094	Viruses	Choristoneura rosaceana nucleopolyhedrovirus	0	1	0	0	0	0	0	0	0	0	2	0	0	0	0	0	1	0	0	43	0	0	0	0	0	0	0	0	0	0	0	0	0	0	0	0	0	0	0	11	1	0	0	0	0
root|Viruses|Baculoviridae|Alphabaculovirus|Chrysodeixis chalcites nucleopolyhedrovirus	S	320432	Viruses	Chrysodeixis chalcites nucleopolyhedrovirus	1	4	1	3	1	2	1	2	0	0	5	1	0	0	0	0	0	0	1	0	0	0	0	0	2	1	2	2	0	1	0	1	0	0	1	0	0	0	0	0	0	0	0	0	0
root|Viruses|Baculoviridae|Alphabaculovirus|Chrysodeixis includens nucleopolyhedrovirus	S	1207438	Viruses	Chrysodeixis includens nucleopolyhedrovirus	4	0	3	6	4	1	0	5	1	0	1	2	2	2	0	1	3	1	2	1	0	3	1	0	0	12	3	0	0	2	3	10	4	16	0	0	18	3	0	2	196	0	1	1	16
root|Viruses|Baculoviridae|Alphabaculovirus|Chrysodeixis includens nucleopolyhedrovirus|Pseudoplusia includens SNPV IE	S1	1592335	Viruses	Pseudoplusia includens SNPV IE	4	0	3	6	4	1	0	5	1	0	1	2	2	2	0	1	3	1	2	1	0	3	1	0	0	12	3	0	0	2	3	10	4	16	0	0	18	3	0	2	196	0	1	1	16
root|Viruses|Baculoviridae|Alphabaculovirus|Clanis bilineata nucleopolyhedrovirus	S	1307957	Viruses	Clanis bilineata nucleopolyhedrovirus	7	3	1	1	1	0	6	1	1	0	3	1	0	3	1	0	2	1	2	0	0	0	1	0	0	0	1	0	3	0	1	0	0	0	0	0	0	0	0	1	0	6	1	0	0
root|Viruses|Baculoviridae|Alphabaculovirus|Ectropis obliqua nucleopolyhedrovirus	S	59376	Viruses	Ectropis obliqua nucleopolyhedrovirus	0	0	2	5	0	1	1	1	0	0	0	0	0	1	0	0	0	1	2	0	0	0	0	0	0	0	1	0	0	0	0	2	0	0	0	0	0	0	0	0	0	1	0	0	0
root|Viruses|Baculoviridae|Alphabaculovirus|Epiphyas postvittana nucleopolyhedrovirus	S	70600	Viruses	Epiphyas postvittana nucleopolyhedrovirus	5	0	5	1	2	1	1	0	0	1	2	2	0	3	2	1	0	1	1	0	0	0	2	1	0	0	0	1	1	0	1	1	1	1	0	0	0	0	3	0	0	0	0	0	0
root|Viruses|Baculoviridae|Alphabaculovirus|Euproctis pseudoconspersa nucleopolyhedrovirus	S	307467	Viruses	Euproctis pseudoconspersa nucleopolyhedrovirus	0	0	0	2	2	1	0	1	1	0	2	0	0	1	0	0	2	2	2	1	0	0	1	0	0	0	1	4	0	0	0	1	0	0	0	0	0	0	1	0	1	0	0	0	0
root|Viruses|Baculoviridae|Alphabaculovirus|Helicoverpa armigera nucleopolyhedrovirus	S	51313	Viruses	Helicoverpa armigera nucleopolyhedrovirus	1	1	0	0	1	0	1	0	1	0	0	1	0	0	0	5	0	2	0	0	0	0	0	0	0	0	0	0	1	0	0	0	1	0	0	1	0	0	0	0	0	0	1	0	1
root|Viruses|Baculoviridae|Alphabaculovirus|Helicoverpa armigera nucleopolyhedrovirus|Helicoverpa armigera nucleopolyhedrovirus G4	S1	148363	Viruses	Helicoverpa armigera nucleopolyhedrovirus G4	1	0	0	0	0	0	0	0	0	0	0	0	0	0	0	0	0	0	0	0	0	0	0	0	0	0	0	0	0	0	0	0	0	0	0	0	0	0	0	0	0	0	0	0	0
root|Viruses|Baculoviridae|Alphabaculovirus|Hemileuca species nucleopolyhedrovirus	S	2560521	Viruses	Hemileuca species nucleopolyhedrovirus	2	2	1	3	2	0	0	0	0	1	0	1	1	1	0	0	2	3	1	0	0	0	1	0	0	0	0	0	0	0	0	0	0	0	0	0	0	0	0	2	1	0	0	0	0
root|Viruses|Baculoviridae|Alphabaculovirus|Hemileuca species nucleopolyhedrovirus|Hemileuca sp. nucleopolyhedrovirus	S1	1367203	Viruses	Hemileuca sp. nucleopolyhedrovirus	2	2	1	3	2	0	0	0	0	1	0	1	1	1	0	0	2	3	1	0	0	0	1	0	0	0	0	0	0	0	0	0	0	0	0	0	0	0	0	2	1	0	0	0	0
root|Viruses|Baculoviridae|Alphabaculovirus|Hyphantria cunea nucleopolyhedrovirus	S	28288	Viruses	Hyphantria cunea nucleopolyhedrovirus	3	2	0	0	0	0	1	1	0	0	2	0	1	1	0	2	2	1	0	0	0	0	0	1	0	0	0	1	0	1	0	0	0	0	0	0	1	0	0	0	0	0	0	0	0
root|Viruses|Baculoviridae|Alphabaculovirus|Lambdina fiscellaria nucleopolyhedrovirus	S	1642929	Viruses	Lambdina fiscellaria nucleopolyhedrovirus	6	4	6	5	2	3	2	1	0	2	0	6	1	5	2	2	5	5	3	0	0	1	0	1	0	3	0	2	0	1	0	0	0	0	1	0	2	0	1	1	1	2	0	0	0
root|Viruses|Baculoviridae|Alphabaculovirus|Leucania separata nucleopolyhedrovirus	S	1307956	Viruses	Leucania separata nucleopolyhedrovirus	5	6	4	4	1	0	3	3	1	2	0	1	0	0	1	5	4	1	3	0	0	1	0	0	0	0	0	0	2	1	0	2	0	0	0	1	0	0	0	0	0	0	0	0	0
root|Viruses|Baculoviridae|Alphabaculovirus|Lonomia obliqua nucleopolyhedrovirus	S	2560562	Viruses	Lonomia obliqua nucleopolyhedrovirus	0	0	0	1	0	2	1	0	0	0	2	0	0	1	0	0	1	1	1	0	0	0	0	0	0	0	0	3	1	0	0	1	0	0	1	0	0	0	0	0	0	1	0	0	1
root|Viruses|Baculoviridae|Alphabaculovirus|Lonomia obliqua nucleopolyhedrovirus|Lonomia obliqua multiple nucleopolyhedrovirus	S1	134394	Viruses	Lonomia obliqua multiple nucleopolyhedrovirus	0	0	0	1	0	2	1	0	0	0	2	0	0	1	0	0	1	1	1	0	0	0	0	0	0	0	0	3	1	0	0	1	0	0	1	0	0	0	0	0	0	1	0	0	1
root|Viruses|Baculoviridae|Alphabaculovirus|Lymantria dispar multiple nucleopolyhedrovirus	S	10449	Viruses	Lymantria dispar multiple nucleopolyhedrovirus	2	2	2	0	2	1	4	1	3	1	1	0	0	0	0	20	4	0	2	0	3	0	0	2	1	0	0	1	0	0	0	0	1	0	0	1	0	0	0	0	1	0	0	1	0
root|Viruses|Baculoviridae|Alphabaculovirus|Lymantria xylina nucleopolyhedrovirus	S	166921	Viruses	Lymantria xylina nucleopolyhedrovirus	1	0	1	1	3	1	1	3	1	0	1	0	0	0	0	0	0	2	0	0	0	2	2	5	0	0	0	0	0	0	0	0	0	0	0	0	1	0	0	1	0	1	0	0	0
root|Viruses|Baculoviridae|Alphabaculovirus|Mamestra brassicae multiple nucleopolyhedrovirus	S	78219	Viruses	Mamestra brassicae multiple nucleopolyhedrovirus	0	0	1	0	1	0	0	0	0	0	0	0	0	0	0	0	0	0	0	0	0	0	0	0	0	0	0	0	0	0	0	0	0	0	0	0	0	0	0	0	0	0	0	0	0
root|Viruses|Baculoviridae|Alphabaculovirus|Mamestra configurata nucleopolyhedrovirus A	S	207830	Viruses	Mamestra configurata nucleopolyhedrovirus A	0	1	2	0	2	0	0	2	0	0	0	0	1	3	0	1	1	2	0	0	0	0	0	0	0	0	0	3	0	0	0	0	0	0	0	0	0	0	0	0	0	0	0	0	0
root|Viruses|Baculoviridae|Alphabaculovirus|Mamestra configurata nucleopolyhedrovirus B	S	204440	Viruses	Mamestra configurata nucleopolyhedrovirus B	0	0	1	0	0	0	0	0	0	0	0	0	0	0	1	0	0	2	1	0	0	0	0	0	0	0	0	0	0	1	0	1	1	0	0	0	0	0	0	0	0	0	0	2	0
root|Viruses|Baculoviridae|Alphabaculovirus|Maruca vitrata nucleopolyhedrovirus	S	1307954	Viruses	Maruca vitrata nucleopolyhedrovirus	0	0	1	0	3	1	0	1	0	0	0	0	1	1	0	0	2	2	1	0	0	0	0	0	0	0	0	0	2	0	0	0	0	0	1	0	0	0	0	0	0	0	0	0	0
root|Viruses|Baculoviridae|Alphabaculovirus|Mythimna unipuncta nucleopolyhedrovirus	S	447897	Viruses	Mythimna unipuncta nucleopolyhedrovirus	4	2	1	1	0	0	1	0	0	0	4	0	2	0	0	2	0	2	1	0	0	0	1	0	0	0	0	0	4	0	0	0	0	0	0	0	0	0	0	0	0	0	0	0	0
root|Viruses|Baculoviridae|Alphabaculovirus|Operophtera brumata nucleopolyhedrovirus	S	1046267	Viruses	Operophtera brumata nucleopolyhedrovirus	2	0	3	0	0	0	0	1	0	0	0	0	0	0	0	0	0	1	0	0	0	0	0	0	0	0	0	0	0	0	0	0	0	0	0	0	0	1	0	0	0	0	0	0	0
root|Viruses|Baculoviridae|Alphabaculovirus|Orgyia leucostigma nucleopolyhedrovirus	S	490711	Viruses	Orgyia leucostigma nucleopolyhedrovirus	0	0	0	0	3	0	0	0	0	0	0	0	0	1	0	3	0	4	2	0	0	0	2	0	0	0	1	0	3	0	0	1	0	0	1	0	0	0	0	2	0	0	1	0	0
root|Viruses|Baculoviridae|Alphabaculovirus|Orgyia pseudotsugata multiple nucleopolyhedrovirus	S	262177	Viruses	Orgyia pseudotsugata multiple nucleopolyhedrovirus	0	0	0	2	0	0	1	0	0	1	1	0	0	1	0	185	0	0	14	0	0	1	1	1	18	2	13	0	79	329	5	0	0	2	1	0	0	0	7	0	0	1	162	0	1
root|Viruses|Baculoviridae|Alphabaculovirus|Oxyplax ochracea nucleopolyhedrovirus	S	2083176	Viruses	Oxyplax ochracea nucleopolyhedrovirus	0	1	0	2	5	3	1	1	3	0	1	1	1	3	0	0	0	1	0	0	0	1	0	0	0	0	1	1	0	0	0	3	2	17	0	0	4	0	0	2	0	1	0	1	0
root|Viruses|Baculoviridae|Alphabaculovirus|Perigonia lusca nucleopolyhedrovirus	S	2560642	Viruses	Perigonia lusca nucleopolyhedrovirus	0	2	1	2	0	2	1	3	2	2	2	3	1	0	0	0	2	3	0	0	0	0	0	1	0	1	0	2	1	0	0	5	12	27	2	1	6	0	0	0	0	4	1	3	2
root|Viruses|Baculoviridae|Alphabaculovirus|Perigonia lusca nucleopolyhedrovirus|Perigonia lusca single nucleopolyhedrovirus	S1	1675865	Viruses	Perigonia lusca single nucleopolyhedrovirus	0	2	1	2	0	2	1	3	2	2	2	3	1	0	0	0	2	3	0	0	0	0	0	1	0	1	0	2	1	0	0	5	12	27	2	1	6	0	0	0	0	4	1	3	2
root|Viruses|Baculoviridae|Alphabaculovirus|Spodoptera exigua multiple nucleopolyhedrovirus	S	10454	Viruses	Spodoptera exigua multiple nucleopolyhedrovirus	1	2	2	1	0	0	0	4	0	0	2	1	0	4	2	1	1	1	4	1	0	1	0	0	0	0	0	1	0	0	0	0	0	0	0	0	0	0	0	1	0	1	2	0	0
root|Viruses|Baculoviridae|Alphabaculovirus|Spodoptera frugiperda multiple nucleopolyhedrovirus	S	10455	Viruses	Spodoptera frugiperda multiple nucleopolyhedrovirus	4	2	2	0	2	2	1	1	1	2	2	0	0	1	1	2	3	1	1	0	0	0	1	0	0	0	0	0	0	0	0	3	0	0	0	0	3	1	1	0	0	0	0	0	0
root|Viruses|Baculoviridae|Alphabaculovirus|Spodoptera littoralis nucleopolyhedrovirus	S	10456	Viruses	Spodoptera littoralis nucleopolyhedrovirus	2	0	0	1	1	0	0	0	0	0	1	0	0	2	1	1	0	5	0	1	5	0	0	3	2	1	0	0	2	1	2	1	0	1	1	0	0	1	0	1	0	0	0	0	0
root|Viruses|Baculoviridae|Alphabaculovirus|Spodoptera litura nucleopolyhedrovirus	S	46242	Viruses	Spodoptera litura nucleopolyhedrovirus	2	2	0	0	0	0	0	1	0	0	2	2	0	1	0	26	0	7	39	0	0	0	0	0	0	0	1	0	0	2	0	0	0	0	1	0	0	0	1	0	0	0	0	0	0
root|Viruses|Baculoviridae|Alphabaculovirus|Sucra jujuba nucleopolyhedrovirus	S	1563660	Viruses	Sucra jujuba nucleopolyhedrovirus	2	2	1	0	0	0	2	2	0	0	4	2	1	2	1	1	0	0	0	0	0	0	0	1	0	0	0	5	0	0	0	0	0	1	0	0	0	1	0	0	0	0	0	0	0
root|Viruses|Baculoviridae|Alphabaculovirus|Thysanoplusia orichalcea nucleopolyhedrovirus	S	101850	Viruses	Thysanoplusia orichalcea nucleopolyhedrovirus	1	0	1	1	0	1	1	0	0	1	2	0	0	1	0	0	0	3	0	0	0	0	1	0	0	0	0	1	1	0	0	0	0	0	0	0	0	0	1	0	0	0	1	0	0
root|Viruses|Baculoviridae|Alphabaculovirus|Trichoplusia ni single nucleopolyhedrovirus	S	332054	Viruses	Trichoplusia ni single nucleopolyhedrovirus	0	0	1	1	4	1	1	3	2	0	0	0	1	0	0	0	0	0	6	1	0	2	0	0	0	4	0	0	1	0	0	0	0	0	0	0	0	1	0	0	0	0	0	0	0
root|Viruses|Baculoviridae|Alphabaculovirus|Urbanus proteus nucleopolyhedrovirus	S	1675866	Viruses	Urbanus proteus nucleopolyhedrovirus	11	16	6	2	4	8	4	1	3	0	6	1	7	10	0	7	0	1	2	1	0	1	0	1	0	2	0	4	2	3	1	1	0	0	4	0	1	0	0	1	0	0	0	0	0
root|Viruses|Baculoviridae|Alphabaculovirus|unclassified Alphabaculovirus	G1	745176	Viruses	unclassified Alphabaculovirus	2	6	7	9	5	3	5	7	2	1	7	2	1	2	1	1	3	17	47	3	0	4	0	1	0	5	2	1	1	8	2	1	0	2	0	0	1	0	0	3	0	0	1	1	0
root|Viruses|Baculoviridae|Alphabaculovirus|unclassified Alphabaculovirus|Adoxophyes orana nucleopolyhedrovirus	S	542343	Viruses	Adoxophyes orana nucleopolyhedrovirus	0	0	0	0	0	0	1	1	1	0	1	0	1	0	0	0	1	0	0	1	0	1	0	0	0	0	1	0	0	0	0	0	0	0	0	0	0	0	0	0	0	0	0	0	0
root|Viruses|Baculoviridae|Alphabaculovirus|unclassified Alphabaculovirus|Anticarsia gemmatalis nucleopolyhedrovirus	S	31507	Viruses	Anticarsia gemmatalis nucleopolyhedrovirus	0	0	0	1	0	0	0	0	0	0	0	0	0	0	0	0	0	0	0	0	0	0	0	0	0	0	0	0	0	0	0	0	0	0	0	0	0	0	0	0	0	0	0	0	0
root|Viruses|Baculoviridae|Alphabaculovirus|unclassified Alphabaculovirus|Apocheima cinerarium nucleopolyhedrovirus	S	307461	Viruses	Apocheima cinerarium nucleopolyhedrovirus	1	0	0	0	0	1	0	1	0	0	2	1	0	0	0	0	1	1	0	2	0	0	0	0	0	0	0	0	0	0	1	0	0	0	0	0	0	0	0	0	0	0	0	0	0
root|Viruses|Baculoviridae|Alphabaculovirus|unclassified Alphabaculovirus|Condylorrhiza vestigialis MNPV	S	1592576	Viruses	Condylorrhiza vestigialis MNPV	1	0	3	0	1	0	0	0	1	0	0	0	0	0	0	0	0	1	0	0	0	0	0	1	0	0	0	0	0	1	0	0	0	1	0	0	0	0	0	1	0	0	0	0	0
root|Viruses|Baculoviridae|Alphabaculovirus|unclassified Alphabaculovirus|Malacosoma neustria nucleopolyhedrovirus	S	38012	Viruses	Malacosoma neustria nucleopolyhedrovirus	0	0	0	0	0	1	0	3	0	0	0	1	0	0	0	1	0	0	0	0	0	0	0	0	0	0	0	0	0	0	0	0	0	0	0	0	0	0	0	0	0	0	0	0	0
root|Viruses|Baculoviridae|Alphabaculovirus|unclassified Alphabaculovirus|Peridroma alphabaculovirus	S	1346829	Viruses	Peridroma alphabaculovirus	0	3	2	6	3	1	4	2	0	0	3	0	0	1	1	0	0	6	8	0	0	1	0	0	0	1	1	0	1	1	1	1	0	0	0	0	1	0	0	2	0	0	1	1	0
root|Viruses|Baculoviridae|Alphabaculovirus|unclassified Alphabaculovirus|Spodoptera litura nucleopolyhedrovirus II	S	566270	Viruses	Spodoptera litura nucleopolyhedrovirus II	0	3	2	2	1	0	0	0	0	1	1	0	0	1	0	0	1	9	39	0	0	2	0	0	0	4	0	1	0	6	0	0	0	1	0	0	0	0	0	0	0	0	0	0	0
root|Viruses|Baculoviridae|Betabaculovirus	G	558017	Viruses	Betabaculovirus	21	18	19	16	24	18	30	15	5	9	8	12	9	22	2	10	22	16	34	12	19	5	74	122	27	10	8	10	10	5	17	19	4	19	5	8	16	0	3	10	1	16	1	3	6
root|Viruses|Baculoviridae|Betabaculovirus|Adoxophyes orana granulovirus	S	170617	Viruses	Adoxophyes orana granulovirus	2	0	1	0	1	0	1	0	0	0	0	1	0	1	1	0	1	1	2	0	0	0	9	0	0	0	0	1	0	0	0	0	0	0	0	0	0	0	0	0	0	0	0	0	0
root|Viruses|Baculoviridae|Betabaculovirus|Agrotis segetum granulovirus	S	10464	Viruses	Agrotis segetum granulovirus	3	2	4	2	3	4	2	0	1	1	1	1	3	2	0	0	0	1	0	0	0	0	0	0	0	0	2	1	0	2	0	8	1	10	0	0	1	0	0	1	0	1	0	1	0
root|Viruses|Baculoviridae|Betabaculovirus|Artogeia rapae granulovirus	S	362830	Viruses	Artogeia rapae granulovirus	1	0	0	0	2	1	2	0	1	0	1	2	0	0	0	0	2	0	0	0	0	0	0	0	0	2	0	1	0	0	0	0	0	0	0	0	1	0	0	0	0	0	0	0	0
root|Viruses|Baculoviridae|Betabaculovirus|Choristoneura fumiferana granulovirus	S	56947	Viruses	Choristoneura fumiferana granulovirus	1	2	0	0	1	0	0	2	0	1	0	0	0	1	1	0	0	0	0	1	0	0	0	0	0	0	1	0	1	0	0	1	0	0	0	0	0	0	0	0	0	14	0	0	0
root|Viruses|Baculoviridae|Betabaculovirus|Clostera anachoreta granulovirus	S	283675	Viruses	Clostera anachoreta granulovirus	0	0	0	0	0	1	0	0	0	0	0	1	0	0	0	0	1	0	0	0	0	0	0	0	0	0	0	1	1	0	0	0	0	0	1	0	0	0	1	0	0	0	0	0	0
root|Viruses|Baculoviridae|Betabaculovirus|Clostera anastomosis granulovirus A	S	1986289	Viruses	Clostera anastomosis granulovirus A	0	1	0	1	0	0	0	1	0	0	0	0	0	0	0	0	1	2	1	0	0	0	0	0	0	0	0	0	0	0	0	0	0	0	0	0	0	0	0	0	0	0	0	0	0
root|Viruses|Baculoviridae|Betabaculovirus|Clostera anastomosis granulovirus A|Clostera anastomosis granulovirus Henan	S1	1986291	Viruses	Clostera anastomosis granulovirus Henan	0	1	0	1	0	0	0	1	0	0	0	0	0	0	0	0	1	2	1	0	0	0	0	0	0	0	0	0	0	0	0	0	0	0	0	0	0	0	0	0	0	0	0	0	0
root|Viruses|Baculoviridae|Betabaculovirus|Clostera anastomosis granulovirus B	S	1986290	Viruses	Clostera anastomosis granulovirus B	1	0	1	0	0	1	2	0	0	1	0	0	0	1	0	0	1	1	0	0	0	0	1	0	0	2	0	1	0	0	0	0	0	0	0	0	0	0	1	0	0	1	0	1	1
root|Viruses|Baculoviridae|Betabaculovirus|Cnaphalocrocis medinalis granulovirus	S	1750712	Viruses	Cnaphalocrocis medinalis granulovirus	1	0	1	2	1	1	2	1	1	0	0	0	0	1	0	0	5	5	2	0	0	1	0	0	1	0	0	0	0	0	0	2	0	0	0	0	0	0	1	0	0	0	0	0	0
root|Viruses|Baculoviridae|Betabaculovirus|Cryptophlebia leucotreta granulovirus	S	35254	Viruses	Cryptophlebia leucotreta granulovirus	0	1	1	3	0	1	4	2	1	0	1	4	2	4	0	0	6	0	0	0	0	1	1	0	0	0	0	0	2	0	0	1	0	0	0	0	1	0	0	0	0	0	0	0	0
root|Viruses|Baculoviridae|Betabaculovirus|Cydia pomonella granulovirus	S	28289	Viruses	Cydia pomonella granulovirus	0	1	0	0	0	0	1	1	0	0	0	0	0	1	0	0	1	0	1	0	0	0	0	0	0	1	0	0	0	0	0	0	0	0	0	0	0	0	0	0	0	0	0	0	0
root|Viruses|Baculoviridae|Betabaculovirus|Diatraea saccharalis granulovirus	S	1675862	Viruses	Diatraea saccharalis granulovirus	0	0	0	1	0	0	4	0	0	0	1	1	0	0	0	0	2	0	0	0	0	0	0	0	0	0	0	0	2	0	0	0	0	0	0	0	0	0	0	0	0	0	0	0	0
root|Viruses|Baculoviridae|Betabaculovirus|Epinotia aporema granulovirus	S	166056	Viruses	Epinotia aporema granulovirus	1	1	2	0	0	0	1	1	0	0	1	0	0	1	0	0	0	0	0	0	0	0	2	0	0	1	0	0	1	0	0	0	0	0	0	0	0	0	0	0	0	0	0	0	0
root|Viruses|Baculoviridae|Betabaculovirus|Erinnyis ello granulovirus	S	307444	Viruses	Erinnyis ello granulovirus	1	0	1	1	1	0	2	0	0	0	0	0	1	1	0	0	0	0	0	0	0	0	0	0	0	0	0	0	0	0	0	0	0	0	0	0	1	0	0	0	0	0	0	0	0
root|Viruses|Baculoviridae|Betabaculovirus|Helicoverpa armigera granulovirus	S	489830	Viruses	Helicoverpa armigera granulovirus	1	1	0	0	1	2	0	0	0	0	0	0	0	0	0	1	1	0	0	0	0	0	0	0	0	0	0	0	0	0	0	0	0	0	0	0	0	0	0	0	0	0	0	0	1
root|Viruses|Baculoviridae|Betabaculovirus|Mocis latipes granulovirus	S	2072024	Viruses	Mocis latipes granulovirus	3	3	0	2	4	2	1	1	1	2	1	1	0	0	0	0	0	2	0	0	0	1	0	1	0	1	0	1	1	1	0	3	0	0	0	0	4	0	0	1	0	0	0	0	0
root|Viruses|Baculoviridae|Betabaculovirus|Mythimna unipuncta granulovirus A	S	2169745	Viruses	Mythimna unipuncta granulovirus A	0	0	0	0	0	0	0	0	0	0	0	0	0	1	0	0	1	1	0	0	0	0	0	0	0	0	0	0	0	0	0	0	0	0	0	0	0	0	0	0	0	0	0	0	2
root|Viruses|Baculoviridae|Betabaculovirus|Mythimna unipuncta granulovirus A|Pseudalatia unipuncta granulovirus	S1	36355	Viruses	Pseudalatia unipuncta granulovirus	0	0	0	0	0	0	0	0	0	0	0	0	0	1	0	0	1	1	0	0	0	0	0	0	0	0	0	0	0	0	0	0	0	0	0	0	0	0	0	0	0	0	0	0	2
root|Viruses|Baculoviridae|Betabaculovirus|Mythimna unipuncta granulovirus B	S	2169746	Viruses	Mythimna unipuncta granulovirus B	2	0	0	1	0	0	3	0	0	0	1	0	0	0	0	0	0	1	21	2	3	0	14	43	0	1	0	1	0	1	0	1	0	2	0	0	0	0	0	1	0	0	0	1	0
root|Viruses|Baculoviridae|Betabaculovirus|Phthorimaea operculella granulovirus	S	192584	Viruses	Phthorimaea operculella granulovirus	0	1	0	0	0	1	0	2	0	1	0	0	0	0	0	8	0	0	0	0	0	0	0	0	0	0	0	1	1	0	1	0	1	0	0	0	0	0	0	0	0	0	0	0	1
root|Viruses|Baculoviridae|Betabaculovirus|Plodia interpunctella granulovirus	S	262175	Viruses	Plodia interpunctella granulovirus	0	1	1	0	0	0	0	1	0	0	0	0	0	1	0	0	0	1	0	0	0	0	0	0	0	1	0	0	0	0	0	1	1	0	0	0	0	0	0	0	0	0	1	0	0
root|Viruses|Baculoviridae|Betabaculovirus|Plutella xylostella granulovirus	S	98383	Viruses	Plutella xylostella granulovirus	0	2	0	0	0	0	0	0	0	0	0	0	0	0	0	0	0	0	0	0	0	0	1	0	0	0	2	0	0	0	0	0	1	1	0	0	0	0	0	0	0	0	0	0	0
root|Viruses|Baculoviridae|Betabaculovirus|Spodoptera frugiperda granulovirus	S	307454	Viruses	Spodoptera frugiperda granulovirus	3	1	3	1	4	1	0	0	0	0	0	0	0	5	0	1	0	1	2	8	16	1	46	78	19	1	1	0	1	0	16	0	0	0	2	8	5	0	0	3	0	0	0	0	1
root|Viruses|Baculoviridae|Betabaculovirus|Spodoptera litura granulovirus	S	359919	Viruses	Spodoptera litura granulovirus	1	0	1	1	3	2	3	2	0	1	0	0	0	1	0	0	0	0	3	0	0	1	0	0	0	0	0	0	0	0	0	2	0	0	1	0	0	0	0	0	0	0	0	0	0
root|Viruses|Baculoviridae|Betabaculovirus|Trichoplusia ni granulovirus	S	10462	Viruses	Trichoplusia ni granulovirus	0	0	1	0	3	0	0	0	0	1	1	0	2	0	0	0	0	0	0	1	0	0	0	0	0	0	1	2	0	0	0	0	0	0	1	0	3	0	0	4	0	0	0	0	0
root|Viruses|Baculoviridae|Betabaculovirus|Trichoplusia ni granulovirus|Trichoplusia ni granulovirus LBIV-12	S1	1916701	Viruses	Trichoplusia ni granulovirus LBIV-12	0	0	1	0	3	0	0	0	0	1	1	0	2	0	0	0	0	0	0	1	0	0	0	0	0	0	1	2	0	0	0	0	0	0	1	0	3	0	0	4	0	0	0	0	0
root|Viruses|Baculoviridae|Betabaculovirus|Xestia c-nigrum granulovirus	S	51677	Viruses	Xestia c-nigrum granulovirus	0	0	2	1	0	0	1	0	0	0	0	0	1	0	0	0	0	0	2	0	0	0	0	0	0	0	0	0	0	0	0	0	0	0	0	0	0	0	0	0	0	0	0	0	0
root|Viruses|Baculoviridae|Deltabaculovirus	G	558019	Viruses	Deltabaculovirus	1	1	0	0	1	1	5	1	0	0	0	0	0	1	0	0	1	2	1	0	0	0	0	0	0	0	1	1	0	0	0	0	0	0	0	0	0	0	1	0	0	0	0	2	0
root|Viruses|Baculoviridae|Deltabaculovirus|Culex nigripalpus nucleopolyhedrovirus	S	130556	Viruses	Culex nigripalpus nucleopolyhedrovirus	1	1	0	0	1	1	5	1	0	0	0	0	0	1	0	0	1	2	1	0	0	0	0	0	0	0	1	1	0	0	0	0	0	0	0	0	0	0	1	0	0	0	0	2	0
root|Viruses|Baculoviridae|Gammabaculovirus	G	558018	Viruses	Gammabaculovirus	0	0	2	0	1	1	4	7	0	0	1	1	0	2	0	3	1	2	0	0	0	0	1	2	0	1	0	2	1	1	0	1	15	13	0	0	0	0	0	0	0	6	0	0	0
root|Viruses|Baculoviridae|Gammabaculovirus|Neodiprion lecontei nucleopolyhedrovirus	S	249151	Viruses	Neodiprion lecontei nucleopolyhedrovirus	0	0	0	0	0	0	0	3	0	0	0	0	0	0	0	2	1	1	0	0	0	0	0	0	0	1	0	0	0	0	0	0	15	13	0	0	0	0	0	0	0	6	0	0	0
root|Viruses|Baculoviridae|Gammabaculovirus|Neodiprion sertifer nucleopolyhedrovirus	S	111874	Viruses	Neodiprion sertifer nucleopolyhedrovirus	0	0	2	0	1	1	4	4	0	0	0	1	0	0	0	1	0	0	0	0	0	0	0	0	0	0	0	2	1	1	0	1	0	0	0	0	0	0	0	0	0	0	0	0	0
root|Viruses|Baculoviridae|Gammabaculovirus|unclassified Gammabaculovirus	G1	1233523	Viruses	unclassified Gammabaculovirus	0	0	0	0	0	0	0	0	0	0	1	0	0	2	0	0	0	1	0	0	0	0	0	2	0	0	0	0	0	0	0	0	0	0	0	0	0	0	0	0	0	0	0	0	0
root|Viruses|Baculoviridae|Gammabaculovirus|unclassified Gammabaculovirus|Neodiprion abietis NPV	S	204507	Viruses	Neodiprion abietis NPV	0	0	0	0	0	0	0	0	0	0	1	0	0	2	0	0	0	1	0	0	0	0	0	2	0	0	0	0	0	0	0	0	0	0	0	0	0	0	0	0	0	0	0	0	0
root|Viruses|Bicaudaviridae	F	423358	Viruses	Bicaudaviridae	2	4	9	4	1	1	1	1	2	1	3	1	1	2	0	0	1	0	0	1	4	54	1	0	1	3	1	1	1	0	0	0	0	1	0	0	0	0	0	0	0	0	0	0	0
root|Viruses|Bicaudaviridae|Bicaudavirus	G	680194	Viruses	Bicaudavirus	0	1	6	2	0	0	0	0	1	0	2	1	0	1	0	0	0	0	0	1	4	54	0	0	1	0	0	1	0	0	0	0	0	0	0	0	0	0	0	0	0	0	0	0	0
root|Viruses|Bicaudaviridae|Bicaudavirus|Acidianus two-tailed virus	S	315953	Viruses	Acidianus two-tailed virus	0	1	6	2	0	0	0	0	1	0	2	1	0	1	0	0	0	0	0	1	4	54	0	0	1	0	0	1	0	0	0	0	0	0	0	0	0	0	0	0	0	0	0	0	0
root|Viruses|Bicaudaviridae|unclassified Bicaudaviridae	F1	1123963	Viruses	unclassified Bicaudaviridae	2	3	3	2	1	1	1	1	1	1	1	0	1	1	0	0	1	0	0	0	0	0	1	0	0	3	1	0	1	0	0	0	0	1	0	0	0	0	0	0	0	0	0	0	0
root|Viruses|Bicaudaviridae|unclassified Bicaudaviridae|Acidianus tailed spindle virus	S	1797140	Viruses	Acidianus tailed spindle virus	1	3	0	1	0	1	0	0	1	1	0	0	0	0	0	0	1	0	0	0	0	0	0	0	0	2	1	0	0	0	0	0	0	1	0	0	0	0	0	0	0	0	0	0	0
root|Viruses|Bicaudaviridae|unclassified Bicaudaviridae|Sulfolobus monocaudavirus SMV1	S	1351702	Viruses	Sulfolobus monocaudavirus SMV1	1	0	1	0	0	0	0	0	0	0	0	0	1	0	0	0	0	0	0	0	0	0	0	0	0	0	0	0	0	0	0	0	0	0	0	0	0	0	0	0	0	0	0	0	0
root|Viruses|Bicaudaviridae|unclassified Bicaudaviridae|Sulfolobus monocaudavirus SMV2	S	1580591	Viruses	Sulfolobus monocaudavirus SMV2	0	0	0	0	1	0	0	0	0	0	0	0	0	0	0	0	0	0	0	0	0	0	0	0	0	0	0	0	0	0	0	0	0	0	0	0	0	0	0	0	0	0	0	0	0
root|Viruses|Bicaudaviridae|unclassified Bicaudaviridae|Sulfolobus monocaudavirus SMV3	S	1732177	Viruses	Sulfolobus monocaudavirus SMV3	0	0	0	0	0	0	1	0	0	0	0	0	0	0	0	0	0	0	0	0	0	0	0	0	0	0	0	0	0	0	0	0	0	0	0	0	0	0	0	0	0	0	0	0	0
root|Viruses|Bicaudaviridae|unclassified Bicaudaviridae|Sulfolobus monocaudavirus SMV4	S	1732178	Viruses	Sulfolobus monocaudavirus SMV4	0	0	0	1	0	0	0	0	0	0	0	0	0	0	0	0	0	0	0	0	0	0	0	0	0	0	0	0	0	0	0	0	0	0	0	0	0	0	0	0	0	0	0	0	0
root|Viruses|Bicaudaviridae|unclassified Bicaudaviridae|Sulfolobus virus STSV1	S	285013	Viruses	Sulfolobus virus STSV1	0	0	1	0	0	0	0	1	0	0	0	0	0	1	0	0	0	0	0	0	0	0	1	0	0	0	0	0	1	0	0	0	0	0	0	0	0	0	0	0	0	0	0	0	0
root|Viruses|Bicaudaviridae|unclassified Bicaudaviridae|Sulfolobus virus STSV2	S	1123964	Viruses	Sulfolobus virus STSV2	0	0	1	0	0	0	0	0	0	0	0	0	0	0	0	0	0	0	0	0	0	0	0	0	0	0	0	0	0	0	0	0	0	0	0	0	0	0	0	0	0	0	0	0	0
root|Viruses|Clavaviridae	F	1232737	Viruses	Clavaviridae	0	0	0	2	0	2	0	0	0	0	0	0	0	0	2	29	0	3	0	0	0	0	1	0	3	0	108	0	104	0	15	0	0	2	0	0	0	0	0	0	0	0	21	0	2
root|Viruses|Clavaviridae|Clavavirus	G	1232738	Viruses	Clavavirus	0	0	0	2	0	2	0	0	0	0	0	0	0	0	2	29	0	3	0	0	0	0	1	0	3	0	108	0	104	0	15	0	0	2	0	0	0	0	0	0	0	0	21	0	2
root|Viruses|Clavaviridae|Clavavirus|Aeropyrum pernix bacilliform virus 1	S	700542	Viruses	Aeropyrum pernix bacilliform virus 1	0	0	0	2	0	2	0	0	0	0	0	0	0	0	2	29	0	3	0	0	0	0	1	0	3	0	108	0	104	0	15	0	0	2	0	0	0	0	0	0	0	0	21	0	2
root|Viruses|Dinodnavirus	G	1232647	Viruses	Dinodnavirus	0	0	0	0	0	0	0	0	0	0	0	0	0	0	0	0	0	0	0	0	0	0	0	0	0	0	0	0	0	0	0	0	0	0	0	0	1	0	0	0	0	0	0	0	0
root|Viruses|Dinodnavirus|Heterocapsa circularisquama DNA virus 01	S	650121	Viruses	Heterocapsa circularisquama DNA virus 01	0	0	0	0	0	0	0	0	0	0	0	0	0	0	0	0	0	0	0	0	0	0	0	0	0	0	0	0	0	0	0	0	0	0	0	0	1	0	0	0	0	0	0	0	0
root|Viruses|Duplodnaviria	D1	2731341	Viruses	Duplodnaviria	2515	2740	2642	1993	2279	2678	3431	1880	1343	1227	2310	24873	1572	2160	1091	35902	1486	4831	2715	3843	915	5838	2746	2744	2379	1445	10336	1819	2080	2243	1893	2184	1507	2565	3348	2955	2724	282	1927	4204	2447	4819	1992	253	1515
root|Viruses|Duplodnaviria|Heunggongvirae	D2	2731360	Viruses	Heunggongvirae	2515	2740	2642	1993	2279	2678	3431	1880	1343	1227	2310	24873	1572	2160	1091	35902	1486	4831	2715	3843	915	5838	2746	2744	2379	1445	10336	1819	2080	2243	1893	2184	1507	2565	3348	2955	2724	282	1927	4204	2447	4819	1992	253	1515
root|Viruses|Duplodnaviria|Heunggongvirae|Peploviricota	P	2731361	Viruses	Peploviricota	157	154	146	123	133	162	280	103	62	68	147	74	49	120	69	138	104	234	206	242	73	73	112	185	196	56	480	101	285	51	79	96	47	84	520	87	120	14	24	168	33	136	82	13	17
root|Viruses|Duplodnaviria|Heunggongvirae|Peploviricota|Herviviricetes	C	2731363	Viruses	Herviviricetes	157	154	146	123	133	162	280	103	62	68	147	74	49	120	69	138	104	234	206	242	73	73	112	185	196	56	480	101	285	51	79	96	47	84	520	87	120	14	24	168	33	136	82	13	17
root|Viruses|Duplodnaviria|Heunggongvirae|Peploviricota|Herviviricetes|Herpesvirales	O	548681	Viruses	Herpesvirales	157	154	146	123	133	162	280	103	62	68	147	74	49	120	69	138	104	234	206	242	73	73	112	185	196	56	480	101	285	51	79	96	47	84	520	87	120	14	24	168	33	136	82	13	17
root|Viruses|Duplodnaviria|Heunggongvirae|Peploviricota|Herviviricetes|Herpesvirales|Alloherpesviridae	F	548682	Viruses	Alloherpesviridae	8	12	18	14	11	10	18	7	6	7	3	7	5	11	20	15	14	24	39	3	3	11	7	4	1	6	7	9	4	4	12	7	0	1	178	17	9	2	2	2	0	1	1	4	3
root|Viruses|Duplodnaviria|Heunggongvirae|Peploviricota|Herviviricetes|Herpesvirales|Alloherpesviridae|Batrachovirus	G	692605	Viruses	Batrachovirus	1	1	5	3	2	2	3	0	1	1	1	0	2	3	1	0	0	1	3	2	0	1	2	1	0	1	0	1	1	0	2	1	0	1	0	0	3	0	0	0	0	1	0	0	2
root|Viruses|Duplodnaviria|Heunggongvirae|Peploviricota|Herviviricetes|Herpesvirales|Alloherpesviridae|Batrachovirus|Ranid herpesvirus 1	S	85655	Viruses	Ranid herpesvirus 1	1	0	3	1	1	0	1	0	0	0	0	0	0	0	1	0	0	0	2	1	0	0	0	0	0	0	0	0	0	0	0	0	0	0	0	0	1	0	0	0	0	0	0	0	0
root|Viruses|Duplodnaviria|Heunggongvirae|Peploviricota|Herviviricetes|Herpesvirales|Alloherpesviridae|Batrachovirus|Ranid herpesvirus 2	S	389214	Viruses	Ranid herpesvirus 2	0	1	2	1	1	1	2	0	0	1	1	0	2	2	0	0	0	1	1	1	0	1	2	0	0	0	0	1	1	0	2	1	0	0	0	0	2	0	0	0	0	0	0	0	2
root|Viruses|Duplodnaviria|Heunggongvirae|Peploviricota|Herviviricetes|Herpesvirales|Alloherpesviridae|Batrachovirus|Ranid herpesvirus 3	S	1987509	Viruses	Ranid herpesvirus 3	0	0	0	1	0	1	0	0	1	0	0	0	0	1	0	0	0	0	0	0	0	0	0	1	0	1	0	0	0	0	0	0	0	1	0	0	0	0	0	0	0	1	0	0	0
root|Viruses|Duplodnaviria|Heunggongvirae|Peploviricota|Herviviricetes|Herpesvirales|Alloherpesviridae|Cyprinivirus	G	692606	Viruses	Cyprinivirus	6	9	13	10	8	7	13	7	3	5	2	5	3	6	13	4	12	22	35	1	2	8	5	3	1	2	5	7	3	4	10	6	0	0	161	6	4	2	2	1	0	0	0	4	1
root|Viruses|Duplodnaviria|Heunggongvirae|Peploviricota|Herviviricetes|Herpesvirales|Alloherpesviridae|Cyprinivirus|Anguillid herpesvirus 1	S	150286	Viruses	Anguillid herpesvirus 1	1	1	3	1	2	1	1	0	1	1	0	0	0	1	0	1	1	6	0	0	0	0	0	0	0	0	0	2	1	0	0	0	0	0	1	0	1	0	0	0	0	0	0	0	0
root|Viruses|Duplodnaviria|Heunggongvirae|Peploviricota|Herviviricetes|Herpesvirales|Alloherpesviridae|Cyprinivirus|Cyprinid herpesvirus 1	S	317858	Viruses	Cyprinid herpesvirus 1	0	2	0	1	1	1	2	1	0	1	0	0	0	0	7	0	4	3	27	0	0	1	1	0	0	2	4	0	1	2	1	1	0	0	1	0	1	1	0	0	0	0	0	4	0
root|Viruses|Duplodnaviria|Heunggongvirae|Peploviricota|Herviviricetes|Herpesvirales|Alloherpesviridae|Cyprinivirus|Cyprinid herpesvirus 2	S	317878	Viruses	Cyprinid herpesvirus 2	1	1	0	0	0	1	3	0	1	0	0	4	0	1	2	0	1	0	2	0	0	2	0	0	0	0	0	0	0	1	0	2	0	0	1	1	0	0	2	1	0	0	0	0	0
root|Viruses|Duplodnaviria|Heunggongvirae|Peploviricota|Herviviricetes|Herpesvirales|Alloherpesviridae|Cyprinivirus|Cyprinid herpesvirus 3	S	180230	Viruses	Cyprinid herpesvirus 3	4	4	9	8	5	4	7	6	1	3	2	1	3	4	4	3	6	12	6	1	2	5	4	3	1	0	1	5	1	1	9	3	0	0	158	5	2	1	0	0	0	0	0	0	1
root|Viruses|Duplodnaviria|Heunggongvirae|Peploviricota|Herviviricetes|Herpesvirales|Alloherpesviridae|Ictalurivirus	G	172653	Viruses	Ictalurivirus	1	2	0	1	1	1	2	0	2	1	0	2	0	2	6	11	2	1	1	0	1	2	0	0	0	3	2	1	0	0	0	0	0	0	17	11	2	0	0	1	0	0	1	0	0
root|Viruses|Duplodnaviria|Heunggongvirae|Peploviricota|Herviviricetes|Herpesvirales|Alloherpesviridae|Ictalurivirus|Acipenserid herpesvirus 2	S	320884	Viruses	Acipenserid herpesvirus 2	0	1	0	1	0	0	1	0	0	0	0	0	0	0	0	0	1	1	0	0	0	0	0	0	0	1	0	0	0	0	0	0	0	0	0	0	0	0	0	0	0	0	0	0	0
root|Viruses|Duplodnaviria|Heunggongvirae|Peploviricota|Herviviricetes|Herpesvirales|Alloherpesviridae|Ictalurivirus|Ictalurid herpesvirus 1	S	10401	Viruses	Ictalurid herpesvirus 1	1	1	0	0	0	0	1	0	0	0	0	0	0	2	0	0	0	0	0	0	1	1	0	0	0	1	2	0	0	0	0	0	0	0	0	1	0	0	0	1	0	0	0	0	0
root|Viruses|Duplodnaviria|Heunggongvirae|Peploviricota|Herviviricetes|Herpesvirales|Alloherpesviridae|Ictalurivirus|Ictalurid herpesvirus 2	S	508441	Viruses	Ictalurid herpesvirus 2	0	0	0	0	1	1	0	0	2	1	0	2	0	0	6	11	1	0	1	0	0	1	0	0	0	1	0	1	0	0	0	0	0	0	17	10	2	0	0	0	0	0	1	0	0
root|Viruses|Duplodnaviria|Heunggongvirae|Peploviricota|Herviviricetes|Herpesvirales|Herpesviridae	F	10292	Viruses	Herpesviridae	142	135	121	107	118	151	255	95	55	58	141	65	43	103	48	121	89	196	166	239	70	62	105	181	195	50	471	89	279	46	67	88	47	83	342	70	109	12	21	165	33	134	80	9	14
root|Viruses|Duplodnaviria|Heunggongvirae|Peploviricota|Herviviricetes|Herpesvirales|Herpesviridae|Alphaherpesvirinae	F1	10293	Viruses	Alphaherpesvirinae	50	46	39	37	44	48	109	39	20	27	42	24	16	29	17	72	35	94	30	180	58	24	75	150	108	16	270	24	202	12	43	9	0	11	334	47	57	7	3	112	22	56	57	1	6
root|Viruses|Duplodnaviria|Heunggongvirae|Peploviricota|Herviviricetes|Herpesvirales|Herpesviridae|Alphaherpesvirinae|Iltovirus	G	180255	Viruses	Iltovirus	1	0	0	0	4	1	5	3	0	0	0	1	0	1	0	1	0	2	0	0	0	2	0	0	0	0	0	0	0	0	0	0	0	0	0	0	0	0	0	0	0	0	0	0	0
root|Viruses|Duplodnaviria|Heunggongvirae|Peploviricota|Herviviricetes|Herpesvirales|Herpesviridae|Alphaherpesvirinae|Iltovirus|Gallid alphaherpesvirus 1	S	10386	Viruses	Gallid alphaherpesvirus 1	1	0	0	0	0	0	0	0	0	0	0	1	0	1	0	1	0	0	0	0	0	0	0	0	0	0	0	0	0	0	0	0	0	0	0	0	0	0	0	0	0	0	0	0	0
root|Viruses|Duplodnaviria|Heunggongvirae|Peploviricota|Herviviricetes|Herpesvirales|Herpesviridae|Alphaherpesvirinae|Iltovirus|Psittacid alphaherpesvirus 1	S	50294	Viruses	Psittacid alphaherpesvirus 1	0	0	0	0	4	1	5	3	0	0	0	0	0	0	0	0	0	2	0	0	0	2	0	0	0	0	0	0	0	0	0	0	0	0	0	0	0	0	0	0	0	0	0	0	0
root|Viruses|Duplodnaviria|Heunggongvirae|Peploviricota|Herviviricetes|Herpesvirales|Herpesviridae|Alphaherpesvirinae|Mardivirus	G	180252	Viruses	Mardivirus	4	12	5	5	6	4	7	2	3	0	3	3	3	3	4	6	7	14	12	1	8	4	4	2	0	0	3	5	3	2	6	2	0	0	161	6	1	3	0	6	0	1	2	0	1
root|Viruses|Duplodnaviria|Heunggongvirae|Peploviricota|Herviviricetes|Herpesvirales|Herpesviridae|Alphaherpesvirinae|Mardivirus|Anatid alphaherpesvirus 1	S	104388	Viruses	Anatid alphaherpesvirus 1	0	0	0	0	0	0	0	0	0	0	0	1	0	0	0	0	0	1	0	0	0	1	0	0	0	0	0	0	0	0	1	0	0	0	0	2	0	0	0	0	0	0	0	0	1
root|Viruses|Duplodnaviria|Heunggongvirae|Peploviricota|Herviviricetes|Herpesvirales|Herpesviridae|Alphaherpesvirinae|Mardivirus|Columbid alphaherpesvirus 1	S	93386	Viruses	Columbid alphaherpesvirus 1	0	2	0	1	1	0	3	0	3	0	0	0	0	0	1	1	2	2	0	1	8	0	4	2	0	0	2	0	1	1	5	0	0	0	161	3	0	2	0	6	0	0	2	0	0
root|Viruses|Duplodnaviria|Heunggongvirae|Peploviricota|Herviviricetes|Herpesvirales|Herpesviridae|Alphaherpesvirinae|Mardivirus|Columbid alphaherpesvirus 1	S1	1510155	Viruses	Falconid herpesvirus 1	0	0	0	0	0	0	0	0	1	0	0	0	0	0	0	0	0	0	0	0	0	0	0	0	0	0	0	0	0	0	0	0	0	0	0	0	0	0	0	0	0	0	0	0	0
root|Viruses|Duplodnaviria|Heunggongvirae|Peploviricota|Herviviricetes|Herpesvirales|Herpesviridae|Alphaherpesvirinae|Mardivirus|Gallid alphaherpesvirus 2	S	10390	Viruses	Gallid alphaherpesvirus 2	0	0	2	0	0	0	0	0	0	0	0	0	1	0	0	0	1	0	10	0	0	0	0	0	0	0	0	1	0	0	0	0	0	0	0	0	0	0	0	0	0	0	0	0	0
root|Viruses|Duplodnaviria|Heunggongvirae|Peploviricota|Herviviricetes|Herpesvirales|Herpesviridae|Alphaherpesvirinae|Mardivirus|Gallid alphaherpesvirus 3	S	35250	Viruses	Gallid alphaherpesvirus 3	1	3	1	0	1	3	0	1	0	0	1	0	0	0	2	3	2	4	0	0	0	1	0	0	0	0	0	4	0	0	0	1	0	0	0	0	1	0	0	0	0	0	0	0	0
root|Viruses|Duplodnaviria|Heunggongvirae|Peploviricota|Herviviricetes|Herpesvirales|Herpesviridae|Alphaherpesvirinae|Mardivirus|Meleagrid alphaherpesvirus 1	S	37108	Viruses	Meleagrid alphaherpesvirus 1	2	2	1	1	2	0	1	1	0	0	0	0	1	1	0	2	1	2	0	0	0	1	0	0	0	0	0	0	0	0	0	0	0	0	0	0	0	0	0	0	0	1	0	0	0
root|Viruses|Duplodnaviria|Heunggongvirae|Peploviricota|Herviviricetes|Herpesvirales|Herpesviridae|Alphaherpesvirinae|Mardivirus|Spheniscid alphaherpesvirus 1	S	2560777	Viruses	Spheniscid alphaherpesvirus 1	1	5	1	3	2	1	3	0	0	0	2	2	1	2	1	0	1	5	2	0	0	1	0	0	0	0	1	0	2	1	0	1	0	0	0	1	0	1	0	0	0	0	0	0	0
root|Viruses|Duplodnaviria|Heunggongvirae|Peploviricota|Herviviricetes|Herpesvirales|Herpesviridae|Alphaherpesvirinae|Scutavirus	G	1232637	Viruses	Scutavirus	0	0	0	1	1	3	2	1	3	2	0	0	1	0	0	0	0	0	1	0	0	1	0	0	0	0	1	0	0	0	0	0	0	0	0	0	0	0	0	0	0	0	0	0	0
root|Viruses|Duplodnaviria|Heunggongvirae|Peploviricota|Herviviricetes|Herpesvirales|Herpesviridae|Alphaherpesvirinae|Scutavirus|Chelonid alphaherpesvirus 5	S	702736	Viruses	Chelonid alphaherpesvirus 5	0	0	0	1	0	3	1	1	3	2	0	0	1	0	0	0	0	0	1	0	0	1	0	0	0	0	0	0	0	0	0	0	0	0	0	0	0	0	0	0	0	0	0	0	0
root|Viruses|Duplodnaviria|Heunggongvirae|Peploviricota|Herviviricetes|Herpesvirales|Herpesviridae|Alphaherpesvirinae|Scutavirus|Chelonid alphaherpesvirus 5	S1	70170	Viruses	Green turtle herpesvirus	0	0	0	1	0	3	1	1	3	2	0	0	1	0	0	0	0	0	1	0	0	1	0	0	0	0	0	0	0	0	0	0	0	0	0	0	0	0	0	0	0	0	0	0	0
root|Viruses|Duplodnaviria|Heunggongvirae|Peploviricota|Herviviricetes|Herpesvirales|Herpesviridae|Alphaherpesvirinae|Scutavirus|Chelonid alphaherpesvirus 5	S2	70564	Viruses	Hawaiian green turtle herpesvirus	0	0	0	1	0	3	1	1	3	2	0	0	1	0	0	0	0	0	1	0	0	1	0	0	0	0	0	0	0	0	0	0	0	0	0	0	0	0	0	0	0	0	0	0	0
root|Viruses|Duplodnaviria|Heunggongvirae|Peploviricota|Herviviricetes|Herpesvirales|Herpesviridae|Alphaherpesvirinae|Scutavirus|unclassified Scutavirus	G1	1561225	Viruses	unclassified Scutavirus	0	0	0	0	1	0	1	0	0	0	0	0	0	0	0	0	0	0	0	0	0	0	0	0	0	0	1	0	0	0	0	0	0	0	0	0	0	0	0	0	0	0	0	0	0
root|Viruses|Duplodnaviria|Heunggongvirae|Peploviricota|Herviviricetes|Herpesvirales|Herpesviridae|Alphaherpesvirinae|Scutavirus|unclassified Scutavirus	S	1561226	Viruses	Testudinid herpesvirus 3	0	0	0	0	1	0	1	0	0	0	0	0	0	0	0	0	0	0	0	0	0	0	0	0	0	0	1	0	0	0	0	0	0	0	0	0	0	0	0	0	0	0	0	0	0
root|Viruses|Duplodnaviria|Heunggongvirae|Peploviricota|Herviviricetes|Herpesvirales|Herpesviridae|Alphaherpesvirinae|Simplexvirus	G	10294	Viruses	Simplexvirus	26	19	21	18	25	20	65	24	8	13	25	11	9	16	5	40	13	45	11	97	36	13	64	136	64	10	163	9	110	7	14	3	0	10	171	36	47	4	3	68	5	43	30	1	2
root|Viruses|Duplodnaviria|Heunggongvirae|Peploviricota|Herviviricetes|Herpesvirales|Herpesviridae|Alphaherpesvirinae|Simplexvirus|Ateline alphaherpesvirus 1	S	35243	Viruses	Ateline alphaherpesvirus 1	5	0	1	1	3	8	21	5	1	0	6	1	0	3	1	0	2	5	2	1	0	4	0	2	3	1	5	1	2	1	2	0	0	0	1	1	1	0	3	4	0	1	1	1	0
root|Viruses|Duplodnaviria|Heunggongvirae|Peploviricota|Herviviricetes|Herpesvirales|Herpesviridae|Alphaherpesvirinae|Simplexvirus|Bovine alphaherpesvirus 2	S	10295	Viruses	Bovine alphaherpesvirus 2	0	0	0	0	0	0	0	0	0	0	0	0	0	0	0	0	0	0	0	0	0	0	0	0	0	0	0	0	0	0	0	0	0	0	0	0	1	0	0	0	0	0	0	0	0
root|Viruses|Duplodnaviria|Heunggongvirae|Peploviricota|Herviviricetes|Herpesvirales|Herpesviridae|Alphaherpesvirinae|Simplexvirus|Cercopithecine alphaherpesvirus 2	S	10317	Viruses	Cercopithecine alphaherpesvirus 2	0	1	0	1	3	0	2	1	0	0	0	0	3	1	0	0	1	6	0	0	0	1	2	0	2	1	5	0	0	0	0	0	0	0	0	4	0	0	0	1	1	0	1	0	0
root|Viruses|Duplodnaviria|Heunggongvirae|Peploviricota|Herviviricetes|Herpesvirales|Herpesviridae|Alphaherpesvirinae|Simplexvirus|Human alphaherpesvirus 1	S	10298	Viruses	Human alphaherpesvirus 1	0	1	1	1	0	0	3	3	0	0	1	2	0	2	0	0	0	5	1	0	0	1	0	1	0	1	0	1	0	3	0	0	0	0	0	0	2	0	0	0	0	0	0	0	0
root|Viruses|Duplodnaviria|Heunggongvirae|Peploviricota|Herviviricetes|Herpesvirales|Herpesviridae|Alphaherpesvirinae|Simplexvirus|Human alphaherpesvirus 2	S	10310	Viruses	Human alphaherpesvirus 2	3	4	5	2	3	2	3	1	0	0	1	1	2	4	2	37	3	2	2	95	29	1	58	126	16	1	137	1	104	0	3	1	0	3	0	27	0	0	0	58	0	10	27	0	1
root|Viruses|Duplodnaviria|Heunggongvirae|Peploviricota|Herviviricetes|Herpesvirales|Herpesviridae|Alphaherpesvirinae|Simplexvirus|Leporid alphaherpesvirus 4	S	481315	Viruses	Leporid alphaherpesvirus 4	1	1	1	0	1	0	2	2	1	0	0	0	0	0	1	0	0	2	0	0	0	0	0	0	0	0	1	0	0	0	0	0	0	0	0	0	0	0	0	1	0	0	0	0	0
root|Viruses|Duplodnaviria|Heunggongvirae|Peploviricota|Herviviricetes|Herpesvirales|Herpesviridae|Alphaherpesvirinae|Simplexvirus|Macacine alphaherpesvirus 1	S	10325	Viruses	Macacine alphaherpesvirus 1	6	4	9	3	1	6	19	7	2	6	6	3	1	3	0	2	2	13	0	0	1	3	0	2	0	1	7	3	2	2	0	2	0	0	25	1	4	0	0	1	2	3	0	0	0
root|Viruses|Duplodnaviria|Heunggongvirae|Peploviricota|Herviviricetes|Herpesvirales|Herpesviridae|Alphaherpesvirinae|Simplexvirus|Macropodid alphaherpesvirus 1	S	137443	Viruses	Macropodid alphaherpesvirus 1	5	3	0	0	3	2	2	1	0	0	5	0	0	2	0	0	2	0	0	0	1	0	0	0	43	1	2	0	0	0	0	0	0	0	0	1	13	1	0	0	1	0	0	0	1
root|Viruses|Duplodnaviria|Heunggongvirae|Peploviricota|Herviviricetes|Herpesvirales|Herpesviridae|Alphaherpesvirinae|Simplexvirus|Panine alphaherpesvirus 3	S	2003507	Viruses	Panine alphaherpesvirus 3	1	0	0	3	2	1	1	0	0	0	0	1	0	0	0	0	1	1	1	0	0	0	0	0	0	1	0	0	0	1	0	0	0	0	1	0	0	0	0	0	0	0	0	0	0
root|Viruses|Duplodnaviria|Heunggongvirae|Peploviricota|Herviviricetes|Herpesvirales|Herpesviridae|Alphaherpesvirinae|Simplexvirus|Panine alphaherpesvirus 3	S1	332937	Viruses	Chimpanzee herpesvirus strain 105640	1	0	0	3	2	1	1	0	0	0	0	1	0	0	0	0	1	1	1	0	0	0	0	0	0	1	0	0	0	1	0	0	0	0	1	0	0	0	0	0	0	0	0	0	0
root|Viruses|Duplodnaviria|Heunggongvirae|Peploviricota|Herviviricetes|Herpesvirales|Herpesviridae|Alphaherpesvirinae|Simplexvirus|Papiine alphaherpesvirus 2	S	340907	Viruses	Papiine alphaherpesvirus 2	1	0	0	0	2	0	4	3	0	2	0	0	0	1	1	0	0	2	1	1	3	0	4	3	0	0	0	0	0	0	8	0	0	0	144	1	0	0	0	0	0	0	0	0	0
root|Viruses|Duplodnaviria|Heunggongvirae|Peploviricota|Herviviricetes|Herpesvirales|Herpesviridae|Alphaherpesvirinae|Simplexvirus|Saimiriine alphaherpesvirus 1	S	10353	Viruses	Saimiriine alphaherpesvirus 1	0	1	3	3	3	0	3	0	3	2	2	1	2	0	0	0	0	6	0	0	1	3	0	1	0	3	5	1	0	0	1	0	0	7	0	0	25	3	0	2	0	28	0	0	0
root|Viruses|Duplodnaviria|Heunggongvirae|Peploviricota|Herviviricetes|Herpesvirales|Herpesviridae|Alphaherpesvirinae|Simplexvirus|unclassified Simplexvirus	G1	342410	Viruses	unclassified Simplexvirus	0	0	0	1	1	0	2	0	0	1	0	0	0	0	0	0	0	0	2	0	1	0	0	0	0	0	0	0	0	0	0	0	0	0	0	0	0	0	0	0	0	0	0	0	0
root|Viruses|Duplodnaviria|Heunggongvirae|Peploviricota|Herviviricetes|Herpesvirales|Herpesviridae|Alphaherpesvirinae|Simplexvirus|unclassified Simplexvirus	S	1343901	Viruses	Fruit bat alphaherpesvirus 1	0	0	0	1	1	0	2	0	0	1	0	0	0	0	0	0	0	0	2	0	1	0	0	0	0	0	0	0	0	0	0	0	0	0	0	0	0	0	0	0	0	0	0	0	0
root|Viruses|Duplodnaviria|Heunggongvirae|Peploviricota|Herviviricetes|Herpesvirales|Herpesviridae|Alphaherpesvirinae|Varicellovirus	G	10319	Viruses	Varicellovirus	19	15	13	13	8	20	30	9	6	12	14	9	2	9	8	25	15	33	6	82	14	4	7	12	44	6	103	10	89	3	23	4	0	1	2	5	9	0	0	38	17	12	25	0	3
root|Viruses|Duplodnaviria|Heunggongvirae|Peploviricota|Herviviricetes|Herpesvirales|Herpesviridae|Alphaherpesvirinae|Varicellovirus|Bovine alphaherpesvirus 1	S	10320	Viruses	Bovine alphaherpesvirus 1	1	4	1	3	3	3	5	3	0	0	3	2	0	2	1	0	1	8	1	0	0	0	0	0	16	0	1	2	1	1	0	1	0	0	1	0	1	0	0	0	0	0	0	0	0
root|Viruses|Duplodnaviria|Heunggongvirae|Peploviricota|Herviviricetes|Herpesvirales|Herpesviridae|Alphaherpesvirinae|Varicellovirus|Bovine alphaherpesvirus 5	S	35244	Viruses	Bovine alphaherpesvirus 5	1	0	0	1	0	1	3	0	0	0	1	2	0	0	0	0	1	0	3	2	0	1	0	0	0	0	1	0	0	0	15	0	0	0	0	0	3	0	0	4	0	1	1	0	0
root|Viruses|Duplodnaviria|Heunggongvirae|Peploviricota|Herviviricetes|Herpesvirales|Herpesviridae|Alphaherpesvirinae|Varicellovirus|Bubaline alphaherpesvirus 1	S	202910	Viruses	Bubaline alphaherpesvirus 1	3	1	1	0	0	2	2	0	0	0	1	0	0	1	0	1	1	0	0	0	0	1	2	1	0	0	0	0	1	0	0	0	0	0	0	0	0	0	0	1	1	0	0	0	0
root|Viruses|Duplodnaviria|Heunggongvirae|Peploviricota|Herviviricetes|Herpesvirales|Herpesviridae|Alphaherpesvirinae|Varicellovirus|Canid alphaherpesvirus 1	S	170325	Viruses	Canid alphaherpesvirus 1	4	1	3	2	0	0	0	0	3	1	1	0	1	1	1	1	2	2	1	0	0	0	0	0	0	1	1	1	0	2	0	2	0	0	0	0	2	0	0	0	0	5	0	0	0
root|Viruses|Duplodnaviria|Heunggongvirae|Peploviricota|Herviviricetes|Herpesvirales|Herpesviridae|Alphaherpesvirinae|Varicellovirus|Cercopithecine alphaherpesvirus 9	S	35246	Viruses	Cercopithecine alphaherpesvirus 9	0	0	0	0	1	1	1	0	1	0	0	0	0	0	0	0	0	0	0	0	0	0	0	0	0	1	0	0	0	0	0	0	0	0	0	0	1	0	0	0	1	0	0	0	0
root|Viruses|Duplodnaviria|Heunggongvirae|Peploviricota|Herviviricetes|Herpesvirales|Herpesviridae|Alphaherpesvirinae|Varicellovirus|Equid alphaherpesvirus 1	S	10326	Viruses	Equid alphaherpesvirus 1	2	2	1	0	1	3	1	0	0	0	0	0	0	1	0	0	0	1	0	1	0	0	0	0	0	1	0	2	2	0	0	0	0	0	0	0	0	0	0	0	0	0	0	0	0
root|Viruses|Duplodnaviria|Heunggongvirae|Peploviricota|Herviviricetes|Herpesvirales|Herpesviridae|Alphaherpesvirinae|Varicellovirus|Equid alphaherpesvirus 3	S	80341	Viruses	Equid alphaherpesvirus 3	1	0	1	2	1	1	5	0	0	1	0	2	0	0	1	0	2	6	0	0	12	0	1	6	10	0	1	3	2	0	1	0	0	0	0	2	0	0	0	0	0	0	0	0	1
root|Viruses|Duplodnaviria|Heunggongvirae|Peploviricota|Herviviricetes|Herpesvirales|Herpesviridae|Alphaherpesvirinae|Varicellovirus|Equid alphaherpesvirus 4	S	10331	Viruses	Equid alphaherpesvirus 4	0	0	2	0	0	1	0	0	0	0	0	0	0	1	0	0	0	0	0	0	2	0	0	1	0	0	0	0	0	0	0	0	0	0	0	0	0	0	0	0	0	0	0	0	0
root|Viruses|Duplodnaviria|Heunggongvirae|Peploviricota|Herviviricetes|Herpesvirales|Herpesviridae|Alphaherpesvirinae|Varicellovirus|Equid alphaherpesvirus 8	S	39637	Viruses	Equid alphaherpesvirus 8	1	0	0	0	0	0	0	0	0	0	0	0	0	0	0	0	0	0	0	0	0	0	0	0	0	0	0	0	0	0	0	0	0	0	0	0	0	0	0	0	0	1	0	0	0
root|Viruses|Duplodnaviria|Heunggongvirae|Peploviricota|Herviviricetes|Herpesvirales|Herpesviridae|Alphaherpesvirinae|Varicellovirus|Equid alphaherpesvirus 9	S	55744	Viruses	Equid alphaherpesvirus 9	0	0	0	0	0	0	2	0	1	1	0	0	0	1	1	0	1	0	0	0	0	0	0	0	0	0	1	0	0	0	0	0	0	0	0	0	1	0	0	0	0	0	0	0	0
root|Viruses|Duplodnaviria|Heunggongvirae|Peploviricota|Herviviricetes|Herpesvirales|Herpesviridae|Alphaherpesvirinae|Varicellovirus|Felid alphaherpesvirus 1	S	10334	Viruses	Felid alphaherpesvirus 1	0	0	0	0	0	0	0	0	0	0	1	0	0	0	0	0	0	0	0	0	0	0	0	0	0	0	0	0	0	0	0	0	0	0	0	0	0	0	0	0	0	0	0	0	0
root|Viruses|Duplodnaviria|Heunggongvirae|Peploviricota|Herviviricetes|Herpesvirales|Herpesviridae|Alphaherpesvirinae|Varicellovirus|Human alphaherpesvirus 3	S	10335	Viruses	Human alphaherpesvirus 3	0	1	1	1	0	1	0	1	0	0	2	1	0	0	0	0	2	0	0	0	0	0	0	0	0	0	0	0	0	0	0	0	0	0	0	0	0	0	0	0	0	0	0	0	0
root|Viruses|Duplodnaviria|Heunggongvirae|Peploviricota|Herviviricetes|Herpesvirales|Herpesviridae|Alphaherpesvirinae|Varicellovirus|Phocid alphaherpesvirus 1	S	47418	Viruses	Phocid alphaherpesvirus 1	0	1	0	0	0	1	0	0	0	0	0	0	0	0	0	0	0	0	0	0	0	0	0	0	0	0	0	0	0	0	0	0	0	0	0	0	0	0	0	0	0	0	0	0	0
root|Viruses|Duplodnaviria|Heunggongvirae|Peploviricota|Herviviricetes|Herpesvirales|Herpesviridae|Alphaherpesvirinae|Varicellovirus|Suid alphaherpesvirus 1	S	10345	Viruses	Suid alphaherpesvirus 1	2	3	2	4	2	4	6	1	1	3	1	1	0	1	4	23	3	7	1	79	0	2	4	3	18	0	97	2	83	0	7	1	0	1	1	3	1	0	0	33	15	5	24	0	2
root|Viruses|Duplodnaviria|Heunggongvirae|Peploviricota|Herviviricetes|Herpesvirales|Herpesviridae|Betaherpesvirinae	F1	10357	Viruses	Betaherpesvirinae	47	38	52	34	46	59	97	31	20	22	64	30	10	37	16	18	29	66	86	53	10	28	18	20	39	17	176	39	34	21	20	39	27	19	4	20	29	3	11	41	4	69	11	6	7
root|Viruses|Duplodnaviria|Heunggongvirae|Peploviricota|Herviviricetes|Herpesvirales|Herpesviridae|Betaherpesvirinae|Caviid betaherpesvirus 2	S	33706	Viruses	Caviid betaherpesvirus 2	0	1	3	2	2	0	3	0	0	0	2	0	0	2	0	3	2	2	2	1	0	0	0	0	0	0	1	0	0	0	1	1	0	0	0	1	0	0	0	0	1	0	0	0	0
root|Viruses|Duplodnaviria|Heunggongvirae|Peploviricota|Herviviricetes|Herpesvirales|Herpesviridae|Betaherpesvirinae|Cytomegalovirus	G	10358	Viruses	Cytomegalovirus	22	19	25	7	9	16	47	9	3	6	30	13	4	15	8	10	13	28	53	7	9	16	3	10	17	5	144	16	23	12	18	18	16	14	1	4	12	0	8	2	1	18	7	2	2
root|Viruses|Duplodnaviria|Heunggongvirae|Peploviricota|Herviviricetes|Herpesvirales|Herpesviridae|Betaherpesvirinae|Cytomegalovirus|Aotine betaherpesvirus 1	S	50290	Viruses	Aotine betaherpesvirus 1	1	3	3	0	1	1	5	0	1	0	0	1	0	5	0	4	0	1	0	3	6	1	1	7	11	0	6	3	6	0	10	0	0	0	0	1	1	0	0	1	0	1	2	0	0
root|Viruses|Duplodnaviria|Heunggongvirae|Peploviricota|Herviviricetes|Herpesvirales|Herpesviridae|Betaherpesvirinae|Cytomegalovirus|Cercopithecine betaherpesvirus 5	S	50292	Viruses	Cercopithecine betaherpesvirus 5	2	5	6	1	1	1	6	1	0	3	11	5	2	1	1	1	4	3	0	2	1	1	0	2	6	1	1	4	3	4	0	1	1	0	0	0	0	0	0	1	0	0	0	0	0
root|Viruses|Duplodnaviria|Heunggongvirae|Peploviricota|Herviviricetes|Herpesvirales|Herpesviridae|Betaherpesvirinae|Cytomegalovirus|Cercopithecine betaherpesvirus 5	S1	1667587	Viruses	Papio ursinus cytomegalovirus	2	3	5	0	0	1	4	0	0	2	4	2	1	0	1	0	4	3	0	0	0	0	0	1	0	1	0	2	2	0	0	0	1	0	0	0	0	0	0	1	0	0	0	0	0
root|Viruses|Duplodnaviria|Heunggongvirae|Peploviricota|Herviviricetes|Herpesvirales|Herpesviridae|Betaherpesvirinae|Cytomegalovirus|Human betaherpesvirus 5	S	10359	Viruses	Human betaherpesvirus 5	4	2	4	0	2	3	3	1	0	0	0	3	1	1	1	2	1	7	43	0	2	3	0	1	0	0	123	1	2	4	0	0	0	0	1	0	0	0	1	0	0	2	2	0	0
root|Viruses|Duplodnaviria|Heunggongvirae|Peploviricota|Herviviricetes|Herpesvirales|Herpesviridae|Betaherpesvirinae|Cytomegalovirus|Macacine betaherpesvirus 3	S	47929	Viruses	Macacine betaherpesvirus 3	1	0	0	0	0	1	0	0	0	0	0	0	0	0	0	0	1	0	0	0	0	0	0	0	0	0	0	1	0	0	0	1	0	0	0	0	0	0	0	0	0	0	0	0	0
root|Viruses|Duplodnaviria|Heunggongvirae|Peploviricota|Herviviricetes|Herpesvirales|Herpesviridae|Betaherpesvirinae|Cytomegalovirus|Panine betaherpesvirus 2	S	188763	Viruses	Panine betaherpesvirus 2	7	6	6	2	4	2	14	3	1	1	4	2	1	6	3	1	2	14	4	2	0	5	0	0	0	2	4	2	3	1	0	2	0	0	0	3	3	0	0	0	0	0	0	0	0
root|Viruses|Duplodnaviria|Heunggongvirae|Peploviricota|Herviviricetes|Herpesvirales|Herpesviridae|Betaherpesvirinae|Cytomegalovirus|Saimiriine betaherpesvirus 4	S	1535247	Viruses	Saimiriine betaherpesvirus 4	2	0	1	0	1	0	2	0	0	0	0	0	0	1	0	0	2	1	1	0	0	0	0	0	0	0	0	0	0	0	0	0	0	0	0	0	0	0	2	0	0	0	0	0	0
root|Viruses|Duplodnaviria|Heunggongvirae|Peploviricota|Herviviricetes|Herpesvirales|Herpesviridae|Betaherpesvirinae|Cytomegalovirus|unclassified Cytomegalovirus	G1	342596	Viruses	unclassified Cytomegalovirus	5	3	5	2	0	7	17	4	1	2	15	2	0	1	3	2	2	1	2	0	0	6	2	0	0	2	10	5	8	3	0	1	0	0	0	0	1	0	0	0	1	10	3	0	1
root|Viruses|Duplodnaviria|Heunggongvirae|Peploviricota|Herviviricetes|Herpesvirales|Herpesviridae|Betaherpesvirinae|Cytomegalovirus|unclassified Cytomegalovirus	S	1919083	Viruses	Cynomolgus cytomegalovirus	5	3	5	2	0	7	17	4	1	2	15	2	0	1	3	2	2	1	2	0	0	6	2	0	0	2	10	5	8	3	0	1	0	0	0	0	1	0	0	0	1	10	3	0	1
root|Viruses|Duplodnaviria|Heunggongvirae|Peploviricota|Herviviricetes|Herpesvirales|Herpesviridae|Betaherpesvirinae|Muromegalovirus	G	10365	Viruses	Muromegalovirus	6	6	5	9	9	14	24	8	3	3	6	3	1	8	2	0	1	14	7	43	0	6	5	3	1	1	18	7	3	1	1	6	9	0	1	13	1	1	2	32	1	38	0	0	2
root|Viruses|Duplodnaviria|Heunggongvirae|Peploviricota|Herviviricetes|Herpesvirales|Herpesviridae|Betaherpesvirinae|Muromegalovirus|Murid betaherpesvirus 1	S	10366	Viruses	Murid betaherpesvirus 1	2	0	2	0	2	4	11	4	0	1	0	1	0	2	2	0	0	6	4	0	0	1	0	0	1	1	3	6	0	0	0	0	0	0	1	3	1	0	2	0	0	0	0	0	0
root|Viruses|Duplodnaviria|Heunggongvirae|Peploviricota|Herviviricetes|Herpesvirales|Herpesviridae|Betaherpesvirinae|Muromegalovirus|Murid betaherpesvirus 2	S	28304	Viruses	Murid betaherpesvirus 2	2	4	3	8	6	10	13	3	3	2	5	2	1	6	0	0	1	8	3	43	0	5	5	3	0	0	15	1	0	1	1	0	1	0	0	10	0	0	0	32	1	38	0	0	2
root|Viruses|Duplodnaviria|Heunggongvirae|Peploviricota|Herviviricetes|Herpesvirales|Herpesviridae|Betaherpesvirinae|Muromegalovirus|Murid betaherpesvirus 2	S1	79700	Viruses	Rat cytomegalovirus Maastricht	2	4	3	8	6	10	13	3	3	2	5	2	1	6	0	0	1	8	3	43	0	5	5	3	0	0	15	1	0	1	1	0	1	0	0	10	0	0	0	32	1	38	0	0	2
root|Viruses|Duplodnaviria|Heunggongvirae|Peploviricota|Herviviricetes|Herpesvirales|Herpesviridae|Betaherpesvirinae|Muromegalovirus|Murid betaherpesvirus 8	S	1261657	Viruses	Murid betaherpesvirus 8	2	2	0	1	1	0	0	1	0	0	1	0	0	0	0	0	0	0	0	0	0	0	0	0	0	0	0	0	3	0	0	6	8	0	0	0	0	1	0	0	0	0	0	0	0
root|Viruses|Duplodnaviria|Heunggongvirae|Peploviricota|Herviviricetes|Herpesvirales|Herpesviridae|Betaherpesvirinae|Proboscivirus	G	548689	Viruses	Proboscivirus	14	6	8	5	13	12	11	5	2	7	12	2	1	9	1	2	9	13	15	0	1	5	9	5	19	3	1	3	3	0	0	6	0	0	2	2	2	0	0	2	1	1	2	2	0
root|Viruses|Duplodnaviria|Heunggongvirae|Peploviricota|Herviviricetes|Herpesvirales|Herpesviridae|Betaherpesvirinae|Proboscivirus|Elephantid betaherpesvirus 1	S	146015	Viruses	Elephantid betaherpesvirus 1	2	0	0	2	2	1	1	0	0	2	0	0	0	3	0	1	3	4	2	0	0	0	0	0	0	0	0	0	1	0	0	2	0	0	0	0	1	0	0	1	0	1	1	0	0
root|Viruses|Duplodnaviria|Heunggongvirae|Peploviricota|Herviviricetes|Herpesvirales|Herpesviridae|Betaherpesvirinae|Proboscivirus|unclassified Proboscivirus	G1	548912	Viruses	unclassified Proboscivirus	12	6	8	3	11	11	10	5	2	5	12	2	1	6	1	1	6	9	13	0	1	5	9	5	19	3	1	3	2	0	0	4	0	0	2	2	1	0	0	1	1	0	1	2	0
root|Viruses|Duplodnaviria|Heunggongvirae|Peploviricota|Herviviricetes|Herpesvirales|Herpesviridae|Betaherpesvirinae|Proboscivirus|unclassified Proboscivirus	S	548914	Viruses	Elephant endotheliotropic herpesvirus 4	12	6	5	3	7	9	9	2	0	5	10	0	0	5	1	1	2	8	13	0	0	4	9	5	19	1	1	3	2	0	0	4	0	0	2	2	1	0	0	1	1	0	1	2	0
root|Viruses|Duplodnaviria|Heunggongvirae|Peploviricota|Herviviricetes|Herpesvirales|Herpesviridae|Betaherpesvirinae|Proboscivirus|unclassified Proboscivirus	S	768738	Viruses	Elephant endotheliotropic herpesvirus 5	0	0	3	0	4	2	1	3	2	0	2	2	1	1	0	0	4	1	0	0	1	1	0	0	0	2	0	0	0	0	0	0	0	0	0	0	0	0	0	0	0	0	0	0	0
root|Viruses|Duplodnaviria|Heunggongvirae|Peploviricota|Herviviricetes|Herpesvirales|Herpesviridae|Betaherpesvirinae|Roseolovirus	G	40272	Viruses	Roseolovirus	2	5	10	9	8	11	7	6	6	4	9	8	4	1	3	1	4	4	7	2	0	1	1	2	1	6	8	7	5	5	0	7	2	5	0	0	12	1	1	4	0	12	2	2	3
root|Viruses|Duplodnaviria|Heunggongvirae|Peploviricota|Herviviricetes|Herpesvirales|Herpesviridae|Betaherpesvirinae|Roseolovirus|Human betaherpesvirus 6A	S	32603	Viruses	Human betaherpesvirus 6A	0	1	0	0	1	0	0	0	0	0	0	0	0	0	0	0	1	1	0	0	0	1	0	0	0	1	1	0	0	1	0	0	0	0	0	0	0	0	0	0	0	0	1	0	0
root|Viruses|Duplodnaviria|Heunggongvirae|Peploviricota|Herviviricetes|Herpesvirales|Herpesviridae|Betaherpesvirinae|Roseolovirus|Human betaherpesvirus 6B	S	32604	Viruses	Human betaherpesvirus 6B	0	1	2	1	1	3	2	0	2	2	6	6	3	0	0	0	0	0	6	0	0	0	0	1	1	3	6	1	0	3	0	1	0	0	0	0	4	0	1	0	0	0	0	0	0
root|Viruses|Duplodnaviria|Heunggongvirae|Peploviricota|Herviviricetes|Herpesvirales|Herpesviridae|Betaherpesvirinae|Roseolovirus|Human betaherpesvirus 7	S	10372	Viruses	Human betaherpesvirus 7	0	2	1	0	1	0	1	0	1	0	0	0	0	0	0	0	1	1	0	0	0	0	0	1	0	0	0	0	0	0	0	0	0	1	0	0	0	0	0	0	0	0	0	1	0
root|Viruses|Duplodnaviria|Heunggongvirae|Peploviricota|Herviviricetes|Herpesvirales|Herpesviridae|Betaherpesvirinae|Roseolovirus|Macacine betaherpesvirus 9	S	2560568	Viruses	Macacine betaherpesvirus 9	0	1	0	2	3	1	1	0	2	2	0	0	1	1	0	0	0	1	0	2	0	0	1	0	0	0	0	3	3	0	0	2	0	0	0	0	4	1	0	3	0	11	0	1	0
root|Viruses|Duplodnaviria|Heunggongvirae|Peploviricota|Herviviricetes|Herpesvirales|Herpesviridae|Betaherpesvirinae|Roseolovirus|Macacine betaherpesvirus 9	S1	1846169	Viruses	Macaca nemestrina herpesvirus 7	0	1	0	2	3	1	1	0	2	2	0	0	1	1	0	0	0	1	0	2	0	0	1	0	0	0	0	3	3	0	0	2	0	0	0	0	4	1	0	3	0	11	0	1	0
root|Viruses|Duplodnaviria|Heunggongvirae|Peploviricota|Herviviricetes|Herpesvirales|Herpesviridae|Betaherpesvirinae|Roseolovirus|Suid betaherpesvirus 2	S	1608255	Viruses	Suid betaherpesvirus 2	0	0	1	0	1	1	1	1	0	0	0	0	0	0	0	0	1	0	1	0	0	0	0	0	0	0	0	1	0	0	0	4	2	3	0	0	4	0	0	0	0	1	0	0	0
root|Viruses|Duplodnaviria|Heunggongvirae|Peploviricota|Herviviricetes|Herpesvirales|Herpesviridae|Betaherpesvirinae|Roseolovirus|unclassified Roseolovirus	G1	431037	Viruses	unclassified Roseolovirus	2	0	6	5	1	6	2	5	1	0	3	2	0	0	3	1	1	1	0	0	0	0	0	0	0	2	1	1	2	1	0	0	0	1	0	0	0	0	0	1	0	0	1	0	3
root|Viruses|Duplodnaviria|Heunggongvirae|Peploviricota|Herviviricetes|Herpesvirales|Herpesviridae|Betaherpesvirinae|Roseolovirus|unclassified Roseolovirus	S	1940555	Viruses	Murine roseolovirus	2	0	6	5	1	6	2	5	1	0	3	2	0	0	3	1	1	1	0	0	0	0	0	0	0	2	1	1	2	1	0	0	0	1	0	0	0	0	0	1	0	0	1	0	3
root|Viruses|Duplodnaviria|Heunggongvirae|Peploviricota|Herviviricetes|Herpesvirales|Herpesviridae|Betaherpesvirinae|Tupaiid betaherpesvirus 1	S	10397	Viruses	Tupaiid betaherpesvirus 1	3	1	1	2	5	6	5	3	6	2	5	4	0	2	2	1	0	5	2	0	0	0	0	0	1	2	4	6	0	3	0	1	0	0	0	0	2	1	0	1	0	0	0	0	0
root|Viruses|Duplodnaviria|Heunggongvirae|Peploviricota|Herviviricetes|Herpesvirales|Herpesviridae|Gammaherpesvirinae	F1	10374	Viruses	Gammaherpesvirinae	45	51	30	36	28	44	49	25	15	9	35	11	17	37	15	31	25	36	50	6	2	10	12	11	48	17	25	26	43	13	4	40	20	53	4	3	23	2	7	12	7	9	12	2	1
root|Viruses|Duplodnaviria|Heunggongvirae|Peploviricota|Herviviricetes|Herpesvirales|Herpesviridae|Gammaherpesvirinae|Lymphocryptovirus	G	10375	Viruses	Lymphocryptovirus	20	22	11	21	12	18	14	11	6	2	5	3	10	9	4	7	12	13	5	1	0	2	2	1	2	2	5	7	20	5	2	2	0	0	2	2	9	0	0	3	1	1	5	0	0
root|Viruses|Duplodnaviria|Heunggongvirae|Peploviricota|Herviviricetes|Herpesvirales|Herpesviridae|Gammaherpesvirinae|Lymphocryptovirus|Callitrichine gammaherpesvirus 3	S	106331	Viruses	Callitrichine gammaherpesvirus 3	0	0	0	1	0	0	0	1	0	0	0	0	0	0	0	0	0	0	0	0	0	0	0	0	0	0	0	0	0	0	1	0	0	0	1	1	0	0	0	0	0	0	1	0	0
root|Viruses|Duplodnaviria|Heunggongvirae|Peploviricota|Herviviricetes|Herpesvirales|Herpesviridae|Gammaherpesvirinae|Lymphocryptovirus|Human gammaherpesvirus 4	S	10376	Viruses	Human gammaherpesvirus 4	4	4	0	1	2	1	0	1	0	1	1	0	0	0	0	0	3	4	1	1	0	0	1	0	2	0	0	1	2	0	0	0	0	0	0	0	1	0	0	1	0	0	1	0	0
root|Viruses|Duplodnaviria|Heunggongvirae|Peploviricota|Herviviricetes|Herpesvirales|Herpesviridae|Gammaherpesvirinae|Lymphocryptovirus|Human gammaherpesvirus 4	S1	12509	Viruses	Human herpesvirus 4 type 2	0	0	0	0	0	0	0	0	0	0	0	0	0	0	0	0	0	0	0	0	0	0	0	0	2	0	0	0	0	0	0	0	0	0	0	0	0	0	0	0	0	0	0	0	0
root|Viruses|Duplodnaviria|Heunggongvirae|Peploviricota|Herviviricetes|Herpesvirales|Herpesviridae|Gammaherpesvirinae|Lymphocryptovirus|Macacine gammaherpesvirus 4	S	45455	Viruses	Macacine gammaherpesvirus 4	16	18	11	19	10	16	14	9	6	1	3	3	9	9	4	7	8	9	3	0	0	2	1	1	0	2	5	6	18	5	1	2	0	0	1	1	8	0	0	2	1	1	2	0	0
root|Viruses|Duplodnaviria|Heunggongvirae|Peploviricota|Herviviricetes|Herpesvirales|Herpesviridae|Gammaherpesvirinae|Lymphocryptovirus|Papiine gammaherpesvirus 1	S	106332	Viruses	Papiine gammaherpesvirus 1	0	0	0	0	0	1	0	0	0	0	1	0	1	0	0	0	1	0	1	0	0	0	0	0	0	0	0	0	0	0	0	0	0	0	0	0	0	0	0	0	0	0	1	0	0
root|Viruses|Duplodnaviria|Heunggongvirae|Peploviricota|Herviviricetes|Herpesvirales|Herpesviridae|Gammaherpesvirinae|Macavirus	G	548687	Viruses	Macavirus	0	1	0	2	2	3	3	1	4	0	2	1	1	4	2	0	4	4	1	0	0	0	1	1	0	0	1	4	1	1	0	1	0	0	0	0	0	1	1	0	0	0	0	0	0
root|Viruses|Duplodnaviria|Heunggongvirae|Peploviricota|Herviviricetes|Herpesvirales|Herpesviridae|Gammaherpesvirinae|Macavirus|Alcelaphine gammaherpesvirus 1	S	35252	Viruses	Alcelaphine gammaherpesvirus 1	0	0	0	0	1	1	0	0	0	0	0	0	0	0	0	0	0	2	0	0	0	0	0	0	0	0	0	1	0	0	0	0	0	0	0	0	0	0	0	0	0	0	0	0	0
root|Viruses|Duplodnaviria|Heunggongvirae|Peploviricota|Herviviricetes|Herpesvirales|Herpesviridae|Gammaherpesvirinae|Macavirus|Alcelaphine gammaherpesvirus 2	S	138184	Viruses	Alcelaphine gammaherpesvirus 2	0	0	0	2	0	0	1	0	0	0	0	0	1	0	2	0	0	1	0	0	0	0	0	1	0	0	1	0	0	0	0	0	0	0	0	0	0	0	0	0	0	0	0	0	0
root|Viruses|Duplodnaviria|Heunggongvirae|Peploviricota|Herviviricetes|Herpesvirales|Herpesviridae|Gammaherpesvirinae|Macavirus|Bovine gammaherpesvirus 6	S	1504288	Viruses	Bovine gammaherpesvirus 6	0	0	0	0	0	2	1	1	0	0	0	1	0	2	0	0	2	0	0	0	0	0	0	0	0	0	0	1	0	0	0	1	0	0	0	0	0	1	1	0	0	0	0	0	0
root|Viruses|Duplodnaviria|Heunggongvirae|Peploviricota|Herviviricetes|Herpesvirales|Herpesviridae|Gammaherpesvirinae|Macavirus|Ovine gammaherpesvirus 2	S	10398	Viruses	Ovine gammaherpesvirus 2	0	1	0	0	1	0	0	0	3	0	0	0	0	2	0	0	1	0	0	0	0	0	0	0	0	0	0	0	0	1	0	0	0	0	0	0	0	0	0	0	0	0	0	0	0
root|Viruses|Duplodnaviria|Heunggongvirae|Peploviricota|Herviviricetes|Herpesvirales|Herpesviridae|Gammaherpesvirinae|Macavirus|Suid gammaherpesvirus 3	S	1960249	Viruses	Suid gammaherpesvirus 3	0	0	0	0	0	0	1	0	0	0	1	0	0	0	0	0	0	0	0	0	0	0	0	0	0	0	0	0	0	0	0	0	0	0	0	0	0	0	0	0	0	0	0	0	0
root|Viruses|Duplodnaviria|Heunggongvirae|Peploviricota|Herviviricetes|Herpesvirales|Herpesviridae|Gammaherpesvirinae|Macavirus|Suid gammaherpesvirus 3	S1	91740	Viruses	Porcine lymphotropic herpesvirus 1	0	0	0	0	0	0	1	0	0	0	1	0	0	0	0	0	0	0	0	0	0	0	0	0	0	0	0	0	0	0	0	0	0	0	0	0	0	0	0	0	0	0	0	0	0
root|Viruses|Duplodnaviria|Heunggongvirae|Peploviricota|Herviviricetes|Herpesvirales|Herpesviridae|Gammaherpesvirinae|Macavirus|Suid gammaherpesvirus 4	S	1960250	Viruses	Suid gammaherpesvirus 4	0	0	0	0	0	0	0	0	0	0	0	0	0	0	0	0	1	0	1	0	0	0	0	0	0	0	0	2	0	0	0	0	0	0	0	0	0	0	0	0	0	0	0	0	0
root|Viruses|Duplodnaviria|Heunggongvirae|Peploviricota|Herviviricetes|Herpesvirales|Herpesviridae|Gammaherpesvirinae|Macavirus|Suid gammaherpesvirus 4	S1	91741	Viruses	Porcine lymphotropic herpesvirus 2	0	0	0	0	0	0	0	0	0	0	0	0	0	0	0	0	1	0	1	0	0	0	0	0	0	0	0	2	0	0	0	0	0	0	0	0	0	0	0	0	0	0	0	0	0
root|Viruses|Duplodnaviria|Heunggongvirae|Peploviricota|Herviviricetes|Herpesvirales|Herpesviridae|Gammaherpesvirinae|Percavirus	G	548688	Viruses	Percavirus	3	11	5	7	6	11	22	4	2	1	17	1	0	9	6	4	3	8	6	3	1	2	4	7	1	2	2	5	9	1	1	11	7	0	1	1	1	1	3	8	3	0	4	2	1
root|Viruses|Duplodnaviria|Heunggongvirae|Peploviricota|Herviviricetes|Herpesvirales|Herpesviridae|Gammaherpesvirinae|Percavirus|Equid gammaherpesvirus 2	S	12657	Viruses	Equid gammaherpesvirus 2	2	5	2	1	2	3	9	2	0	0	1	0	0	4	2	0	0	0	0	0	0	1	1	2	0	0	0	2	0	0	0	3	0	0	0	0	0	0	0	1	0	0	0	0	0
root|Viruses|Duplodnaviria|Heunggongvirae|Peploviricota|Herviviricetes|Herpesvirales|Herpesviridae|Gammaherpesvirinae|Percavirus|Equid gammaherpesvirus 5	S	10371	Viruses	Equid gammaherpesvirus 5	0	4	2	6	4	8	11	2	1	1	15	0	0	5	4	4	2	8	4	3	1	0	3	5	1	2	1	3	8	1	1	8	7	0	1	1	1	1	3	7	3	0	4	1	1
root|Viruses|Duplodnaviria|Heunggongvirae|Peploviricota|Herviviricetes|Herpesvirales|Herpesviridae|Gammaherpesvirinae|Percavirus|Felid gammaherpesvirus 1	S	2560468	Viruses	Felid gammaherpesvirus 1	0	2	1	0	0	0	2	0	1	0	1	0	0	0	0	0	1	0	2	0	0	1	0	0	0	0	1	0	1	0	0	0	0	0	0	0	0	0	0	0	0	0	0	1	0
root|Viruses|Duplodnaviria|Heunggongvirae|Peploviricota|Herviviricetes|Herpesvirales|Herpesviridae|Gammaherpesvirinae|Percavirus|Felid gammaherpesvirus 1	S1	1452540	Viruses	Felis catus gammaherpesvirus 1	0	2	1	0	0	0	2	0	1	0	1	0	0	0	0	0	1	0	2	0	0	1	0	0	0	0	1	0	1	0	0	0	0	0	0	0	0	0	0	0	0	0	0	1	0
root|Viruses|Duplodnaviria|Heunggongvirae|Peploviricota|Herviviricetes|Herpesvirales|Herpesviridae|Gammaherpesvirinae|Percavirus|Mustelid gammaherpesvirus 1	S	311179	Viruses	Mustelid gammaherpesvirus 1	1	0	0	0	0	0	0	0	0	0	0	1	0	0	0	0	0	0	0	0	0	0	0	0	0	0	0	0	0	0	0	0	0	0	0	0	0	0	0	0	0	0	0	0	0
root|Viruses|Duplodnaviria|Heunggongvirae|Peploviricota|Herviviricetes|Herpesvirales|Herpesviridae|Gammaherpesvirinae|Rhadinovirus	G	10379	Viruses	Rhadinovirus	17	9	4	4	6	4	7	6	1	4	5	3	2	10	1	4	4	5	36	0	1	1	5	1	45	8	4	5	4	0	1	0	1	0	1	0	5	0	2	1	3	6	1	0	0
root|Viruses|Duplodnaviria|Heunggongvirae|Peploviricota|Herviviricetes|Herpesvirales|Herpesviridae|Gammaherpesvirinae|Rhadinovirus|Ateline gammaherpesvirus 3	S	85618	Viruses	Ateline gammaherpesvirus 3	6	0	0	3	0	1	3	1	0	0	0	0	1	0	0	0	0	0	1	0	0	0	0	0	0	0	0	0	0	0	0	0	0	0	0	0	0	0	0	1	0	1	0	0	0
root|Viruses|Duplodnaviria|Heunggongvirae|Peploviricota|Herviviricetes|Herpesvirales|Herpesviridae|Gammaherpesvirinae|Rhadinovirus|Bovine gammaherpesvirus 4	S	10385	Viruses	Bovine gammaherpesvirus 4	0	0	0	0	0	0	0	1	0	0	0	1	1	2	0	0	0	0	0	0	0	0	1	0	0	0	0	0	1	0	1	0	0	0	0	0	0	0	0	0	0	0	0	0	0
root|Viruses|Duplodnaviria|Heunggongvirae|Peploviricota|Herviviricetes|Herpesvirales|Herpesviridae|Gammaherpesvirinae|Rhadinovirus|Cricetid gammaherpesvirus 2	S	1605972	Viruses	Cricetid gammaherpesvirus 2	0	0	0	0	0	0	0	0	0	0	0	0	0	0	0	1	0	0	0	0	0	0	0	0	0	0	0	0	0	0	0	0	0	0	0	0	2	0	1	0	0	0	0	0	0
root|Viruses|Duplodnaviria|Heunggongvirae|Peploviricota|Herviviricetes|Herpesvirales|Herpesviridae|Gammaherpesvirinae|Rhadinovirus|Human gammaherpesvirus 8	S	37296	Viruses	Human gammaherpesvirus 8	0	2	0	0	0	0	0	0	0	2	0	0	0	0	0	0	0	0	2	0	1	0	1	0	45	8	0	0	0	0	0	0	0	0	0	0	1	0	0	0	0	0	0	0	0
root|Viruses|Duplodnaviria|Heunggongvirae|Peploviricota|Herviviricetes|Herpesvirales|Herpesviridae|Gammaherpesvirinae|Rhadinovirus|Macacine gammaherpesvirus 5	S	154334	Viruses	Macacine gammaherpesvirus 5	0	0	0	0	1	0	0	0	0	0	0	1	0	2	1	0	1	0	0	0	0	0	0	0	0	0	0	0	1	0	0	0	0	0	0	0	0	0	0	0	0	0	0	0	0
root|Viruses|Duplodnaviria|Heunggongvirae|Peploviricota|Herviviricetes|Herpesvirales|Herpesviridae|Gammaherpesvirinae|Rhadinovirus|Murid gammaherpesvirus 4	S	33708	Viruses	Murid gammaherpesvirus 4	0	0	2	0	0	1	1	0	0	0	1	0	0	0	0	0	0	0	33	0	0	0	0	1	0	0	0	0	0	0	0	0	0	0	1	0	1	0	0	0	2	0	0	0	0
root|Viruses|Duplodnaviria|Heunggongvirae|Peploviricota|Herviviricetes|Herpesvirales|Herpesviridae|Gammaherpesvirinae|Rhadinovirus|Saimiriine gammaherpesvirus 2	S	10381	Viruses	Saimiriine gammaherpesvirus 2	4	3	1	1	1	2	1	1	0	1	4	0	0	2	0	1	3	4	0	0	0	0	3	0	0	0	4	2	1	0	0	0	1	0	0	0	1	0	0	0	1	5	1	0	0
root|Viruses|Duplodnaviria|Heunggongvirae|Peploviricota|Herviviricetes|Herpesvirales|Herpesviridae|Gammaherpesvirinae|Rhadinovirus|unclassified Rhadinovirus	G1	224583	Viruses	unclassified Rhadinovirus	7	4	1	0	4	0	2	3	1	0	0	1	0	4	0	2	0	1	0	0	0	1	0	0	0	0	0	3	1	0	0	0	0	0	0	0	0	0	1	0	0	0	0	0	0
root|Viruses|Duplodnaviria|Heunggongvirae|Peploviricota|Herviviricetes|Herpesvirales|Herpesviridae|Gammaherpesvirinae|Rhadinovirus|unclassified Rhadinovirus	S	2022783	Viruses	Common bottlenose dolphin gammaherpesvirus 1 strain Sarasota	7	4	1	0	4	0	2	3	1	0	0	1	0	4	0	2	0	1	0	0	0	1	0	0	0	0	0	3	1	0	0	0	0	0	0	0	0	0	1	0	0	0	0	0	0
root|Viruses|Duplodnaviria|Heunggongvirae|Peploviricota|Herviviricetes|Herpesvirales|Herpesviridae|Gammaherpesvirinae|unclassified Gammaherpesvirinae	F2	35249	Viruses	unclassified Gammaherpesvirinae	5	8	10	2	2	8	3	3	2	2	6	3	4	5	2	16	2	6	2	2	0	5	0	1	0	5	13	5	9	6	0	26	12	53	0	0	8	0	1	0	0	2	2	0	0
root|Viruses|Duplodnaviria|Heunggongvirae|Peploviricota|Herviviricetes|Herpesvirales|Herpesviridae|Gammaherpesvirinae|unclassified Gammaherpesvirinae|Eptesicus fuscus gammaherpesvirus	S	2035399	Viruses	Eptesicus fuscus gammaherpesvirus	4	5	8	1	1	7	3	3	1	0	4	1	2	2	2	0	2	1	1	2	0	2	0	0	0	2	2	2	5	4	0	0	1	0	0	0	6	0	0	0	0	2	1	0	0
root|Viruses|Duplodnaviria|Heunggongvirae|Peploviricota|Herviviricetes|Herpesvirales|Herpesviridae|Gammaherpesvirinae|unclassified Gammaherpesvirinae|Myotis gammaherpesvirus 8	S	1780507	Viruses	Myotis gammaherpesvirus 8	1	2	1	0	1	0	0	0	1	2	1	1	2	1	0	16	0	5	1	0	0	1	0	1	0	3	11	3	2	1	0	25	11	53	0	0	1	0	1	0	0	0	1	0	0
root|Viruses|Duplodnaviria|Heunggongvirae|Peploviricota|Herviviricetes|Herpesvirales|Herpesviridae|Gammaherpesvirinae|unclassified Gammaherpesvirinae|Rhinolophus gammaherpesvirus 1	S	2054179	Viruses	Rhinolophus gammaherpesvirus 1	0	1	1	1	0	1	0	0	0	0	1	1	0	2	0	0	0	0	0	0	0	2	0	0	0	0	0	0	2	1	0	1	0	0	0	0	1	0	0	0	0	0	0	0	0
root|Viruses|Duplodnaviria|Heunggongvirae|Peploviricota|Herviviricetes|Herpesvirales|Malacoherpesviridae	F	548685	Viruses	Malacoherpesviridae	7	5	6	2	4	1	6	0	1	3	2	1	1	5	1	2	1	11	0	0	0	0	0	0	0	0	2	2	2	1	0	1	0	0	0	0	0	0	1	1	0	1	1	0	0
root|Viruses|Duplodnaviria|Heunggongvirae|Peploviricota|Herviviricetes|Herpesvirales|Malacoherpesviridae|Aurivirus	G	1513230	Viruses	Aurivirus	5	5	2	1	3	1	3	0	0	0	0	1	0	4	0	0	0	6	0	0	0	0	0	0	0	0	2	0	1	0	0	1	0	0	0	0	0	0	0	1	0	1	0	0	0
root|Viruses|Duplodnaviria|Heunggongvirae|Peploviricota|Herviviricetes|Herpesvirales|Malacoherpesviridae|Aurivirus|Haliotid herpesvirus 1	S	1513231	Viruses	Haliotid herpesvirus 1	5	5	2	1	3	1	3	0	0	0	0	1	0	4	0	0	0	6	0	0	0	0	0	0	0	0	2	0	1	0	0	1	0	0	0	0	0	0	0	1	0	1	0	0	0
root|Viruses|Duplodnaviria|Heunggongvirae|Peploviricota|Herviviricetes|Herpesvirales|Malacoherpesviridae|Aurivirus|Haliotid herpesvirus 1|Abalone herpesvirus Victoria/AUS/2009	S1	1241371	Viruses	Abalone herpesvirus Victoria/AUS/2009	5	5	2	1	3	1	3	0	0	0	0	1	0	4	0	0	0	6	0	0	0	0	0	0	0	0	2	0	1	0	0	1	0	0	0	0	0	0	0	1	0	1	0	0	0
root|Viruses|Duplodnaviria|Heunggongvirae|Peploviricota|Herviviricetes|Herpesvirales|Malacoherpesviridae|Ostreavirus	G	548686	Viruses	Ostreavirus	2	0	4	1	1	0	3	0	1	3	2	0	1	1	1	2	1	5	0	0	0	0	0	0	0	0	0	2	1	1	0	0	0	0	0	0	0	0	1	0	0	0	1	0	0
root|Viruses|Duplodnaviria|Heunggongvirae|Peploviricota|Herviviricetes|Herpesvirales|Malacoherpesviridae|Ostreavirus|Ostreid herpesvirus 1	S	261939	Viruses	Ostreid herpesvirus 1	2	0	4	1	1	0	3	0	1	3	2	0	1	1	1	2	1	5	0	0	0	0	0	0	0	0	0	2	1	1	0	0	0	0	0	0	0	0	1	0	0	0	1	0	0
root|Viruses|Duplodnaviria|Heunggongvirae|Peploviricota|Herviviricetes|Herpesvirales|unclassified Herpesvirales	O1	860343	Viruses	unclassified Herpesvirales	0	2	1	0	0	0	1	1	0	0	1	1	0	1	0	0	0	3	1	0	0	0	0	0	0	0	0	1	0	0	0	0	0	0	0	0	2	0	0	0	0	0	0	0	0
root|Viruses|Duplodnaviria|Heunggongvirae|Peploviricota|Herviviricetes|Herpesvirales|unclassified Herpesvirales|Bufonid herpesvirus 1	S	2282206	Viruses	Bufonid herpesvirus 1	0	2	1	0	0	0	1	1	0	0	1	1	0	1	0	0	0	3	1	0	0	0	0	0	0	0	0	1	0	0	0	0	0	0	0	0	2	0	0	0	0	0	0	0	0
root|Viruses|Duplodnaviria|Heunggongvirae|Uroviricota	P	2731618	Viruses	Uroviricota	2358	2586	2496	1870	2146	2516	3151	1777	1281	1159	2163	24799	1523	2040	1022	35764	1382	4596	2509	3601	842	5765	2634	2559	2183	1389	9856	1718	1795	2192	1814	2088	1460	2481	2828	2868	2604	268	1903	4036	2414	4683	1910	240	1498
root|Viruses|Duplodnaviria|Heunggongvirae|Uroviricota|Caudoviricetes	C	2731619	Viruses	Caudoviricetes	2358	2586	2496	1870	2146	2516	3151	1777	1281	1159	2163	24799	1523	2040	1022	35764	1382	4596	2509	3601	842	5765	2634	2559	2183	1389	9856	1718	1795	2192	1814	2088	1460	2481	2828	2868	2604	268	1903	4036	2414	4683	1910	240	1498
root|Viruses|Duplodnaviria|Heunggongvirae|Uroviricota|Caudoviricetes|Caudovirales	O	28883	Viruses	Caudovirales	2358	2586	2496	1870	2146	2516	3151	1777	1281	1159	2163	24799	1523	2040	1022	35764	1382	4596	2509	3601	842	5765	2634	2559	2183	1389	9856	1718	1795	2192	1814	2088	1460	2481	2828	2868	2604	268	1903	4036	2414	4683	1910	240	1498
root|Viruses|Duplodnaviria|Heunggongvirae|Uroviricota|Caudoviricetes|Caudovirales|Ackermannviridae	F	2169529	Viruses	Ackermannviridae	24	21	33	16	30	25	26	10	16	12	16	17	14	24	1	10	11	30	12	5	3	12	1	5	2	10	6	23	13	4	2	39	11	20	5	7	29	2	3	10	3	11	4	0	7
root|Viruses|Duplodnaviria|Heunggongvirae|Uroviricota|Caudoviricetes|Caudovirales|Ackermannviridae|Aglimvirinae	F1	2169530	Viruses	Aglimvirinae	3	2	2	2	1	4	4	0	2	1	0	3	1	8	0	0	1	0	0	0	0	2	0	0	0	1	1	3	0	0	0	2	0	2	0	0	1	0	1	0	0	1	1	0	0
root|Viruses|Duplodnaviria|Heunggongvirae|Uroviricota|Caudoviricetes|Caudovirales|Ackermannviridae|Aglimvirinae|Agtrevirus	G	2169532	Viruses	Agtrevirus	1	1	1	2	1	1	2	0	0	1	0	2	1	7	0	0	0	0	0	0	0	2	0	0	0	0	1	3	0	0	0	1	0	0	0	0	1	0	1	0	0	1	0	0	0
root|Viruses|Duplodnaviria|Heunggongvirae|Uroviricota|Caudoviricetes|Caudovirales|Ackermannviridae|Aglimvirinae|Agtrevirus|Salmonella virus SKML39	S	2169690	Viruses	Salmonella virus SKML39	0	0	0	0	0	0	1	0	0	0	0	1	1	0	0	0	0	0	0	0	0	2	0	0	0	0	0	2	0	0	0	0	0	0	0	0	0	0	0	0	0	0	0	0	0
root|Viruses|Duplodnaviria|Heunggongvirae|Uroviricota|Caudoviricetes|Caudovirales|Ackermannviridae|Aglimvirinae|Agtrevirus|Salmonella virus SKML39	S1	1204528	Viruses	Salmonella phage SKML-39	0	0	0	0	0	0	1	0	0	0	0	1	1	0	0	0	0	0	0	0	0	2	0	0	0	0	0	2	0	0	0	0	0	0	0	0	0	0	0	0	0	0	0	0	0
root|Viruses|Duplodnaviria|Heunggongvirae|Uroviricota|Caudoviricetes|Caudovirales|Ackermannviridae|Aglimvirinae|Agtrevirus|unclassified Agtrevirus	G1	2175606	Viruses	unclassified Agtrevirus	1	1	1	1	0	0	1	0	0	0	0	0	0	5	0	0	0	0	0	0	0	0	0	0	0	0	1	0	0	0	0	0	0	0	0	0	1	0	0	0	0	1	0	0	0
root|Viruses|Duplodnaviria|Heunggongvirae|Uroviricota|Caudoviricetes|Caudovirales|Ackermannviridae|Aglimvirinae|Agtrevirus|unclassified Agtrevirus	S	2137745	Viruses	Enterobacter phage EspM4VN	0	1	1	1	0	0	1	0	0	0	0	0	0	5	0	0	0	0	0	0	0	0	0	0	0	0	0	0	0	0	0	0	0	0	0	0	1	0	0	0	0	0	0	0	0
root|Viruses|Duplodnaviria|Heunggongvirae|Uroviricota|Caudoviricetes|Caudovirales|Ackermannviridae|Aglimvirinae|Agtrevirus|unclassified Agtrevirus	S	2530042	Viruses	Shigella phage MK-13	1	0	0	0	0	0	0	0	0	0	0	0	0	0	0	0	0	0	0	0	0	0	0	0	0	0	0	0	0	0	0	0	0	0	0	0	0	0	0	0	0	0	0	0	0
root|Viruses|Duplodnaviria|Heunggongvirae|Uroviricota|Caudoviricetes|Caudovirales|Ackermannviridae|Aglimvirinae|Agtrevirus|unclassified Agtrevirus	S	2712940	Viruses	Salmonella phage P46FS4	0	0	0	0	0	0	0	0	0	0	0	0	0	0	0	0	0	0	0	0	0	0	0	0	0	0	0	0	0	0	0	0	0	0	0	0	0	0	0	0	0	1	0	0	0
root|Viruses|Duplodnaviria|Heunggongvirae|Uroviricota|Caudoviricetes|Caudovirales|Ackermannviridae|Aglimvirinae|Limestonevirus	G	2169534	Viruses	Limestonevirus	0	1	1	0	0	3	2	0	2	0	0	1	0	1	0	0	1	0	0	0	0	0	0	0	0	1	0	0	0	0	0	1	0	2	0	0	0	0	0	0	0	0	1	0	0
root|Viruses|Duplodnaviria|Heunggongvirae|Uroviricota|Caudoviricetes|Caudovirales|Ackermannviridae|Aglimvirinae|Limestonevirus|Dickeya virus RC2014	S	2169973	Viruses	Dickeya virus RC2014	0	1	0	0	0	0	0	0	0	0	0	0	0	0	0	0	0	0	0	0	0	0	0	0	0	0	0	0	0	0	0	0	0	0	0	0	0	0	0	0	0	0	0	0	0
root|Viruses|Duplodnaviria|Heunggongvirae|Uroviricota|Caudoviricetes|Caudovirales|Ackermannviridae|Aglimvirinae|Limestonevirus|Dickeya virus RC2014	S1	1477406	Viruses	Dickeya phage RC-2014	0	1	0	0	0	0	0	0	0	0	0	0	0	0	0	0	0	0	0	0	0	0	0	0	0	0	0	0	0	0	0	0	0	0	0	0	0	0	0	0	0	0	0	0	0
root|Viruses|Duplodnaviria|Heunggongvirae|Uroviricota|Caudoviricetes|Caudovirales|Ackermannviridae|Cvivirinae	F1	2169531	Viruses	Cvivirinae	5	4	5	2	4	3	8	1	0	2	3	1	2	6	0	4	1	1	1	0	0	2	0	0	2	1	1	0	2	0	0	0	0	0	0	0	0	0	1	0	1	2	1	0	0
root|Viruses|Duplodnaviria|Heunggongvirae|Uroviricota|Caudoviricetes|Caudovirales|Ackermannviridae|Cvivirinae|Kuttervirus	G	2169536	Viruses	Kuttervirus	5	4	5	2	4	3	8	1	0	2	3	1	2	6	0	4	1	1	1	0	0	2	0	0	2	1	1	0	2	0	0	0	0	0	0	0	0	0	1	0	1	2	1	0	0
root|Viruses|Duplodnaviria|Heunggongvirae|Uroviricota|Caudoviricetes|Caudovirales|Ackermannviridae|Cvivirinae|Kuttervirus|Escherichia virus PhaxI	S	1987987	Viruses	Escherichia virus PhaxI	0	1	0	0	0	0	0	0	0	0	0	0	0	0	0	0	0	0	0	0	0	0	0	0	0	0	0	0	0	0	0	0	0	0	0	0	0	0	0	0	0	0	0	0	0
root|Viruses|Duplodnaviria|Heunggongvirae|Uroviricota|Caudoviricetes|Caudovirales|Ackermannviridae|Cvivirinae|Kuttervirus|Escherichia virus PhaxI	S1	926589	Viruses	Escherichia phage PhaxI	0	1	0	0	0	0	0	0	0	0	0	0	0	0	0	0	0	0	0	0	0	0	0	0	0	0	0	0	0	0	0	0	0	0	0	0	0	0	0	0	0	0	0	0	0
root|Viruses|Duplodnaviria|Heunggongvirae|Uroviricota|Caudoviricetes|Caudovirales|Ackermannviridae|Cvivirinae|Kuttervirus|Salmonella virus 38	S	2169807	Viruses	Salmonella virus 38	0	0	1	0	0	0	1	0	0	0	0	0	0	1	0	0	0	0	0	0	0	0	0	0	0	0	0	0	0	0	0	0	0	0	0	0	0	0	0	0	0	0	0	0	0
root|Viruses|Duplodnaviria|Heunggongvirae|Uroviricota|Caudoviricetes|Caudovirales|Ackermannviridae|Cvivirinae|Kuttervirus|Salmonella virus 38	S1	1654891	Viruses	Salmonella phage 38	0	0	1	0	0	0	1	0	0	0	0	0	0	1	0	0	0	0	0	0	0	0	0	0	0	0	0	0	0	0	0	0	0	0	0	0	0	0	0	0	0	0	0	0	0
root|Viruses|Duplodnaviria|Heunggongvirae|Uroviricota|Caudoviricetes|Caudovirales|Ackermannviridae|Cvivirinae|Kuttervirus|Salmonella virus Det7	S	1987157	Viruses	Salmonella virus Det7	0	0	0	0	0	0	0	0	0	0	1	0	0	0	0	0	0	0	0	0	0	0	0	0	0	0	0	0	0	0	0	0	0	0	0	0	0	0	0	0	0	0	0	0	0
root|Viruses|Duplodnaviria|Heunggongvirae|Uroviricota|Caudoviricetes|Caudovirales|Ackermannviridae|Cvivirinae|Kuttervirus|Salmonella virus Det7	S1	454798	Viruses	Salmonella phage Det7	0	0	0	0	0	0	0	0	0	0	1	0	0	0	0	0	0	0	0	0	0	0	0	0	0	0	0	0	0	0	0	0	0	0	0	0	0	0	0	0	0	0	0	0	0
root|Viruses|Duplodnaviria|Heunggongvirae|Uroviricota|Caudoviricetes|Caudovirales|Ackermannviridae|Cvivirinae|Kuttervirus|Salmonella virus SH19	S	1987989	Viruses	Salmonella virus SH19	1	1	0	0	0	0	0	0	0	0	0	0	0	0	0	0	0	0	0	0	0	0	0	0	0	0	0	0	0	0	0	0	0	0	0	0	0	0	0	0	0	0	0	0	0
root|Viruses|Duplodnaviria|Heunggongvirae|Uroviricota|Caudoviricetes|Caudovirales|Ackermannviridae|Cvivirinae|Kuttervirus|Salmonella virus SH19	S1	1108865	Viruses	Salmonella phage Sh19	1	1	0	0	0	0	0	0	0	0	0	0	0	0	0	0	0	0	0	0	0	0	0	0	0	0	0	0	0	0	0	0	0	0	0	0	0	0	0	0	0	0	0	0	0
root|Viruses|Duplodnaviria|Heunggongvirae|Uroviricota|Caudoviricetes|Caudovirales|Ackermannviridae|Cvivirinae|Kuttervirus|unclassifed Kuttervirus	G1	2175604	Viruses	unclassifed Kuttervirus	2	1	3	1	1	1	2	0	0	1	0	1	1	1	0	4	1	1	0	0	0	0	0	0	2	0	0	0	1	0	0	0	0	0	0	0	0	0	0	0	1	2	1	0	0
root|Viruses|Duplodnaviria|Heunggongvirae|Uroviricota|Caudoviricetes|Caudovirales|Ackermannviridae|Cvivirinae|Kuttervirus|unclassifed Kuttervirus	S	2025818	Viruses	Salmonella phage SP1	2	0	0	1	1	0	0	0	0	0	0	0	0	0	0	0	0	0	0	0	0	0	0	0	0	0	0	0	1	0	0	0	0	0	0	0	0	0	0	0	1	0	0	0	0
root|Viruses|Duplodnaviria|Heunggongvirae|Uroviricota|Caudoviricetes|Caudovirales|Ackermannviridae|Cvivirinae|Kuttervirus|unclassifed Kuttervirus	S	2592220	Viruses	Salmonella phage SS9	0	0	0	0	0	0	1	0	0	1	0	1	0	0	0	0	0	0	0	0	0	0	0	0	1	0	0	0	0	0	0	0	0	0	0	0	0	0	0	0	0	0	0	0	0
root|Viruses|Duplodnaviria|Heunggongvirae|Uroviricota|Caudoviricetes|Caudovirales|Ackermannviridae|Cvivirinae|Kuttervirus|unclassifed Kuttervirus	S	2698910	Viruses	Salmonella phage Se-J	0	0	3	0	0	0	0	0	0	0	0	0	0	0	0	1	0	0	0	0	0	0	0	0	0	0	0	0	0	0	0	0	0	0	0	0	0	0	0	0	0	0	0	0	0
root|Viruses|Duplodnaviria|Heunggongvirae|Uroviricota|Caudoviricetes|Caudovirales|Ackermannviridae|Cvivirinae|Kuttervirus|unclassifed Kuttervirus	S	2713278	Viruses	Salmonella phage barely	0	0	0	0	0	0	0	0	0	0	0	0	0	0	0	1	0	0	0	0	0	0	0	0	0	0	0	0	0	0	0	0	0	0	0	0	0	0	0	0	0	0	0	0	0
root|Viruses|Duplodnaviria|Heunggongvirae|Uroviricota|Caudoviricetes|Caudovirales|Ackermannviridae|Cvivirinae|Kuttervirus|unclassifed Kuttervirus	S	2713281	Viruses	Salmonella phage bering	0	0	0	0	0	0	0	0	0	0	0	0	0	0	0	0	1	0	0	0	0	0	0	0	0	0	0	0	0	0	0	0	0	0	0	0	0	0	0	0	0	0	0	0	0
root|Viruses|Duplodnaviria|Heunggongvirae|Uroviricota|Caudoviricetes|Caudovirales|Ackermannviridae|Cvivirinae|Kuttervirus|unclassifed Kuttervirus	S	2713310	Viruses	Salmonella phage pertopsoe	0	1	0	0	0	1	1	0	0	0	0	0	1	0	0	2	0	1	0	0	0	0	0	0	0	0	0	0	0	0	0	0	0	0	0	0	0	0	0	0	0	0	0	0	0
root|Viruses|Duplodnaviria|Heunggongvirae|Uroviricota|Caudoviricetes|Caudovirales|Ackermannviridae|Erwinia virus Ea2809	S	2169686	Viruses	Erwinia virus Ea2809	2	2	1	0	2	1	0	1	1	1	0	3	2	1	0	1	0	1	1	0	0	0	0	0	0	0	0	1	0	1	0	0	0	0	0	0	1	0	0	0	0	0	0	0	1
root|Viruses|Duplodnaviria|Heunggongvirae|Uroviricota|Caudoviricetes|Caudovirales|Ackermannviridae|Erwinia virus Ea2809|Erwinia phage phiEa2809	S1	1564096	Viruses	Erwinia phage phiEa2809	2	2	1	0	2	1	0	1	1	1	0	3	2	1	0	1	0	1	1	0	0	0	0	0	0	0	0	1	0	1	0	0	0	0	0	0	1	0	0	0	0	0	0	0	1
root|Viruses|Duplodnaviria|Heunggongvirae|Uroviricota|Caudoviricetes|Caudovirales|Ackermannviridae|Serratia virus MAM1	S	2169689	Viruses	Serratia virus MAM1	1	1	6	2	3	3	1	1	3	2	0	1	0	0	0	0	2	3	0	0	0	0	0	1	0	2	1	3	1	0	0	0	0	0	0	0	3	0	0	0	0	0	0	0	0
root|Viruses|Duplodnaviria|Heunggongvirae|Uroviricota|Caudoviricetes|Caudovirales|Ackermannviridae|Serratia virus MAM1|Serratia phage phiMAM1	S1	1262513	Viruses	Serratia phage phiMAM1	1	1	6	2	3	3	1	1	3	2	0	1	0	0	0	0	2	3	0	0	0	0	0	1	0	2	1	3	1	0	0	0	0	0	0	0	3	0	0	0	0	0	0	0	0
root|Viruses|Duplodnaviria|Heunggongvirae|Uroviricota|Caudoviricetes|Caudovirales|Ackermannviridae|Taipeivirus	G	2731621	Viruses	Taipeivirus	4	8	8	3	8	9	8	3	2	5	5	7	7	1	0	1	1	6	2	2	0	4	0	4	0	5	3	7	5	1	1	0	6	4	4	7	5	0	0	1	2	6	0	0	1
root|Viruses|Duplodnaviria|Heunggongvirae|Uroviricota|Caudoviricetes|Caudovirales|Ackermannviridae|Taipeivirus|Escherichia virus KWBSE43-6	S	2731622	Viruses	Escherichia virus KWBSE43-6	0	0	0	0	0	0	0	0	0	0	1	0	0	0	0	1	0	0	0	0	0	0	0	0	0	0	1	1	0	0	0	0	0	0	0	0	0	0	0	0	0	0	0	0	0
root|Viruses|Duplodnaviria|Heunggongvirae|Uroviricota|Caudoviricetes|Caudovirales|Ackermannviridae|Taipeivirus|Escherichia virus KWBSE43-6|Escherichia phage vB_EcoM_KWBSE43-6	S1	2508194	Viruses	Escherichia phage vB_EcoM_KWBSE43-6	0	0	0	0	0	0	0	0	0	0	1	0	0	0	0	1	0	0	0	0	0	0	0	0	0	0	1	1	0	0	0	0	0	0	0	0	0	0	0	0	0	0	0	0	0
root|Viruses|Duplodnaviria|Heunggongvirae|Uroviricota|Caudoviricetes|Caudovirales|Ackermannviridae|Taipeivirus|Klebsiella virus 0507KN21	S	2169687	Viruses	Klebsiella virus 0507KN21	0	0	0	0	0	0	2	0	1	0	0	0	0	0	0	0	0	0	0	0	0	0	0	0	0	0	0	0	0	0	0	0	5	3	0	0	4	0	0	0	0	6	0	0	0
root|Viruses|Duplodnaviria|Heunggongvirae|Uroviricota|Caudoviricetes|Caudovirales|Ackermannviridae|Taipeivirus|Klebsiella virus KpS110	S	2731623	Viruses	Klebsiella virus KpS110	1	0	0	0	0	0	0	0	0	0	0	0	0	0	0	0	0	0	1	0	0	0	0	0	0	0	0	0	0	0	0	0	0	0	0	0	0	0	0	0	0	0	0	0	0
root|Viruses|Duplodnaviria|Heunggongvirae|Uroviricota|Caudoviricetes|Caudovirales|Ackermannviridae|Taipeivirus|Klebsiella virus KpS110|Klebsiella virus vB_KpnM_KpS110	S1	2079262	Viruses	Klebsiella virus vB_KpnM_KpS110	1	0	0	0	0	0	0	0	0	0	0	0	0	0	0	0	0	0	1	0	0	0	0	0	0	0	0	0	0	0	0	0	0	0	0	0	0	0	0	0	0	0	0	0	0
root|Viruses|Duplodnaviria|Heunggongvirae|Uroviricota|Caudoviricetes|Caudovirales|Ackermannviridae|Taipeivirus|Klebsiella virus May	S	2731624	Viruses	Klebsiella virus May	0	0	0	0	1	0	0	0	0	0	0	0	0	0	0	0	1	0	0	0	0	1	0	0	0	0	0	0	0	0	0	0	0	0	0	0	0	0	0	0	0	0	0	0	0
root|Viruses|Duplodnaviria|Heunggongvirae|Uroviricota|Caudoviricetes|Caudovirales|Ackermannviridae|Taipeivirus|Klebsiella virus May|Klebsiella phage May	S1	2054272	Viruses	Klebsiella phage May	0	0	0	0	1	0	0	0	0	0	0	0	0	0	0	0	1	0	0	0	0	1	0	0	0	0	0	0	0	0	0	0	0	0	0	0	0	0	0	0	0	0	0	0	0
root|Viruses|Duplodnaviria|Heunggongvirae|Uroviricota|Caudoviricetes|Caudovirales|Ackermannviridae|Taipeivirus|Klebsiella virus Menlow	S	2731625	Viruses	Klebsiella virus Menlow	0	0	0	0	1	1	1	0	0	0	1	0	0	0	0	0	0	0	0	0	0	1	0	0	0	0	0	2	0	0	0	0	0	0	0	0	0	0	0	0	0	0	0	0	0
root|Viruses|Duplodnaviria|Heunggongvirae|Uroviricota|Caudoviricetes|Caudovirales|Ackermannviridae|Taipeivirus|Klebsiella virus Menlow|Klebsiella phage Menlow	S1	2054273	Viruses	Klebsiella phage Menlow	0	0	0	0	1	1	1	0	0	0	1	0	0	0	0	0	0	0	0	0	0	1	0	0	0	0	0	2	0	0	0	0	0	0	0	0	0	0	0	0	0	0	0	0	0
root|Viruses|Duplodnaviria|Heunggongvirae|Uroviricota|Caudoviricetes|Caudovirales|Ackermannviridae|Taipeivirus|Serratia virus IME250	S	2169688	Viruses	Serratia virus IME250	1	0	1	3	2	2	3	0	0	0	1	3	0	0	0	0	0	3	0	1	0	1	0	0	0	3	1	2	0	0	1	0	0	0	4	6	1	0	0	0	0	0	0	0	1
root|Viruses|Duplodnaviria|Heunggongvirae|Uroviricota|Caudoviricetes|Caudovirales|Ackermannviridae|Taipeivirus|Serratia virus IME250|Serratia phage vB-Sru-IME250	S1	1852640	Viruses	Serratia phage vB-Sru-IME250	1	0	1	3	2	2	3	0	0	0	1	3	0	0	0	0	0	3	0	1	0	1	0	0	0	3	1	2	0	0	1	0	0	0	4	6	1	0	0	0	0	0	0	0	1
root|Viruses|Duplodnaviria|Heunggongvirae|Uroviricota|Caudoviricetes|Caudovirales|Ackermannviridae|Taipeivirus|unclassified Taipeivirus	G1	2738376	Viruses	unclassified Taipeivirus	1	0	0	0	0	0	0	0	0	2	0	0	0	0	0	0	0	0	0	0	0	0	0	0	0	0	0	0	0	0	0	0	0	0	0	0	0	0	0	0	0	0	0	0	0
root|Viruses|Duplodnaviria|Heunggongvirae|Uroviricota|Caudoviricetes|Caudovirales|Ackermannviridae|Taipeivirus|unclassified Taipeivirus|Klebsiella phage Magnus	S	2589660	Viruses	Klebsiella phage Magnus	1	0	0	0	0	0	0	0	0	2	0	0	0	0	0	0	0	0	0	0	0	0	0	0	0	0	0	0	0	0	0	0	0	0	0	0	0	0	0	0	0	0	0	0	0
root|Viruses|Duplodnaviria|Heunggongvirae|Uroviricota|Caudoviricetes|Caudovirales|Ackermannviridae|unclassified Ackermannviridae	F1	2175602	Viruses	unclassified Ackermannviridae	9	3	10	6	11	5	3	3	8	1	8	2	2	8	1	4	5	18	6	3	0	3	1	0	0	1	0	6	5	1	1	37	5	14	1	0	18	2	1	9	0	2	2	0	5
root|Viruses|Duplodnaviria|Heunggongvirae|Uroviricota|Caudoviricetes|Caudovirales|Ackermannviridae|unclassified Ackermannviridae|Aeromonas phage phiA8-29	S	1978922	Viruses	Aeromonas phage phiA8-29	3	0	1	3	0	0	1	0	2	0	1	0	1	0	0	0	1	1	0	0	0	1	1	0	0	0	0	4	0	0	0	0	0	0	0	0	1	0	1	0	0	0	0	0	0
root|Viruses|Duplodnaviria|Heunggongvirae|Uroviricota|Caudoviricetes|Caudovirales|Ackermannviridae|unclassified Ackermannviridae|Erwinia phage vB_EamM-Bue1	S	2099338	Viruses	Erwinia phage vB_EamM-Bue1	0	0	0	0	0	0	0	0	0	0	0	0	0	0	0	1	0	0	0	0	0	0	0	0	0	0	0	0	0	0	0	0	0	0	0	0	0	0	0	0	0	0	0	0	0
root|Viruses|Duplodnaviria|Heunggongvirae|Uroviricota|Caudoviricetes|Caudovirales|Ackermannviridae|unclassified Ackermannviridae|Ralstonia phage RSP15	S	1785960	Viruses	Ralstonia phage RSP15	0	0	0	2	2	2	0	0	0	0	1	0	0	3	0	0	1	2	0	0	0	0	0	0	0	0	0	0	0	1	0	0	0	0	0	0	0	0	0	0	0	0	0	0	0
root|Viruses|Duplodnaviria|Heunggongvirae|Uroviricota|Caudoviricetes|Caudovirales|Ackermannviridae|unclassified Ackermannviridae|Rhizobium phage vB_RleM_P10VF	S	1527770	Viruses	Rhizobium phage vB_RleM_P10VF	1	1	0	0	1	0	1	1	3	0	1	1	0	0	0	2	2	2	2	1	0	0	0	0	0	0	0	0	1	0	0	0	0	0	0	0	0	0	0	0	0	0	1	0	0
root|Viruses|Duplodnaviria|Heunggongvirae|Uroviricota|Caudoviricetes|Caudovirales|Ackermannviridae|unclassified Ackermannviridae|Serratia phage vB_SmaA_3M	S	2419930	Viruses	Serratia phage vB_SmaA_3M	0	0	0	0	1	0	0	0	0	0	0	0	0	2	0	0	0	0	0	0	0	0	0	0	0	0	0	0	0	0	0	0	0	0	0	0	0	0	0	0	0	0	0	0	0
root|Viruses|Duplodnaviria|Heunggongvirae|Uroviricota|Caudoviricetes|Caudovirales|Ackermannviridae|unclassified Ackermannviridae|Sinorhizobium phage phiM9	S	1636182	Viruses	Sinorhizobium phage phiM9	0	0	0	1	1	0	0	0	0	0	0	0	1	0	0	0	0	0	0	2	0	2	0	0	0	0	0	2	0	0	0	0	0	0	0	0	0	0	0	6	0	1	0	0	0
root|Viruses|Duplodnaviria|Heunggongvirae|Uroviricota|Caudoviricetes|Caudovirales|Ackermannviridae|unclassified Ackermannviridae|Vibrio phage VAP7	S	2584487	Viruses	Vibrio phage VAP7	1	0	2	0	2	0	0	1	0	1	0	0	0	0	0	0	0	8	1	0	0	0	0	0	0	0	0	0	0	0	0	36	5	14	0	0	17	2	0	3	0	0	1	0	4
root|Viruses|Duplodnaviria|Heunggongvirae|Uroviricota|Caudoviricetes|Caudovirales|Ackermannviridae|unclassified Ackermannviridae|Vibrio phage YC	S	2267403	Viruses	Vibrio phage YC	3	1	7	0	4	2	1	0	1	0	2	0	0	1	0	0	0	2	1	0	0	0	0	0	0	0	0	0	4	0	1	0	0	0	0	0	0	0	0	0	0	0	0	0	1
root|Viruses|Duplodnaviria|Heunggongvirae|Uroviricota|Caudoviricetes|Caudovirales|Ackermannviridae|unclassified Ackermannviridae|Vibrio phage vB_VchM_Kuja	S	2686437	Viruses	Vibrio phage vB_VchM_Kuja	1	1	0	0	0	1	0	1	2	0	3	1	0	2	1	1	1	3	2	0	0	0	0	0	0	1	0	0	0	0	0	1	0	0	1	0	0	0	0	0	0	1	0	0	0
root|Viruses|Duplodnaviria|Heunggongvirae|Uroviricota|Caudoviricetes|Caudovirales|Autographiviridae	F	2731643	Viruses	Autographiviridae	83	84	83	66	63	77	98	52	33	39	71	261	41	73	14	46	42	92	84	53	12	78	52	84	30	58	24	47	55	33	5	115	47	141	28	226	115	6	8	75	106	97	15	8	62
root|Viruses|Duplodnaviria|Heunggongvirae|Uroviricota|Caudoviricetes|Caudovirales|Autographiviridae|Aegirvirus	G	2731926	Viruses	Aegirvirus	0	0	0	0	0	0	0	0	0	0	1	0	0	0	0	0	0	0	0	0	0	0	0	0	0	0	0	0	0	0	0	0	0	0	0	0	0	0	0	0	0	0	0	0	0
root|Viruses|Duplodnaviria|Heunggongvirae|Uroviricota|Caudoviricetes|Caudovirales|Autographiviridae|Aegirvirus|Synechococcus virus SCBP42	S	2733888	Viruses	Synechococcus virus SCBP42	0	0	0	0	0	0	0	0	0	0	1	0	0	0	0	0	0	0	0	0	0	0	0	0	0	0	0	0	0	0	0	0	0	0	0	0	0	0	0	0	0	0	0	0	0
root|Viruses|Duplodnaviria|Heunggongvirae|Uroviricota|Caudoviricetes|Caudovirales|Autographiviridae|Aegirvirus|Synechococcus virus SCBP42|Synechococcus phage S-CBP42	S1	461711	Viruses	Synechococcus phage S-CBP42	0	0	0	0	0	0	0	0	0	0	1	0	0	0	0	0	0	0	0	0	0	0	0	0	0	0	0	0	0	0	0	0	0	0	0	0	0	0	0	0	0	0	0	0	0
root|Viruses|Duplodnaviria|Heunggongvirae|Uroviricota|Caudoviricetes|Caudovirales|Autographiviridae|Aqualcavirus	G	2560093	Viruses	Aqualcavirus	3	0	0	0	5	1	1	0	1	0	0	2	0	1	0	0	0	2	1	0	0	0	0	0	0	0	0	0	0	0	0	0	0	0	0	0	0	0	0	0	0	0	0	0	0
root|Viruses|Duplodnaviria|Heunggongvirae|Uroviricota|Caudoviricetes|Caudovirales|Autographiviridae|Aqualcavirus|Aquamicrobium virus P14	S	2560297	Viruses	Aquamicrobium virus P14	3	0	0	0	5	1	1	0	1	0	0	2	0	1	0	0	0	2	1	0	0	0	0	0	0	0	0	0	0	0	0	0	0	0	0	0	0	0	0	0	0	0	0	0	0
root|Viruses|Duplodnaviria|Heunggongvirae|Uroviricota|Caudoviricetes|Caudovirales|Autographiviridae|Aqualcavirus|Aquamicrobium virus P14|Aquamicrobium phage P14	S1	1927013	Viruses	Aquamicrobium phage P14	3	0	0	0	5	1	1	0	1	0	0	2	0	1	0	0	0	2	1	0	0	0	0	0	0	0	0	0	0	0	0	0	0	0	0	0	0	0	0	0	0	0	0	0	0
root|Viruses|Duplodnaviria|Heunggongvirae|Uroviricota|Caudoviricetes|Caudovirales|Autographiviridae|Ashivirus	G	2731927	Viruses	Ashivirus	0	0	0	1	0	0	1	0	0	0	0	0	0	0	0	0	0	0	0	0	0	0	0	0	0	0	0	0	0	0	0	0	0	0	0	0	0	0	0	0	0	0	0	0	0
root|Viruses|Duplodnaviria|Heunggongvirae|Uroviricota|Caudoviricetes|Caudovirales|Autographiviridae|Ashivirus|Ashivirus S45C4	S	2733889	Viruses	Ashivirus S45C4	0	0	0	1	0	0	1	0	0	0	0	0	0	0	0	0	0	0	0	0	0	0	0	0	0	0	0	0	0	0	0	0	0	0	0	0	0	0	0	0	0	0	0	0	0
root|Viruses|Duplodnaviria|Heunggongvirae|Uroviricota|Caudoviricetes|Caudovirales|Autographiviridae|Ashivirus|Ashivirus S45C4|uncultured phage_MedDCM-OCT-S45-C4	S1	2740801	Viruses	uncultured phage_MedDCM-OCT-S45-C4	0	0	0	1	0	0	1	0	0	0	0	0	0	0	0	0	0	0	0	0	0	0	0	0	0	0	0	0	0	0	0	0	0	0	0	0	0	0	0	0	0	0	0	0	0
root|Viruses|Duplodnaviria|Heunggongvirae|Uroviricota|Caudoviricetes|Caudovirales|Autographiviridae|Atuphduovirus	G	2731928	Viruses	Atuphduovirus	0	0	0	0	0	0	1	0	0	0	0	0	0	0	0	0	0	1	0	0	0	0	0	0	0	0	0	0	0	0	0	0	0	0	0	0	0	0	0	0	0	0	0	0	0
root|Viruses|Duplodnaviria|Heunggongvirae|Uroviricota|Caudoviricetes|Caudovirales|Autographiviridae|Ayakvirus	G	2731929	Viruses	Ayakvirus	6	2	3	4	0	1	3	3	1	0	1	3	0	1	0	4	2	2	0	0	0	0	0	0	19	1	3	0	2	0	0	0	0	0	2	0	2	0	0	0	1	1	0	0	0
root|Viruses|Duplodnaviria|Heunggongvirae|Uroviricota|Caudoviricetes|Caudovirales|Autographiviridae|Ayakvirus|Ralstonia virus Ap1	S	2733892	Viruses	Ralstonia virus Ap1	6	2	3	4	0	1	3	3	1	0	1	3	0	1	0	4	2	2	0	0	0	0	0	0	19	1	3	0	2	0	0	0	0	0	2	0	2	0	0	0	1	1	0	0	0
root|Viruses|Duplodnaviria|Heunggongvirae|Uroviricota|Caudoviricetes|Caudovirales|Autographiviridae|Ayakvirus|Ralstonia virus Ap1|Ralstonia virus phiAp1	S1	1932865	Viruses	Ralstonia virus phiAp1	6	2	3	4	0	1	3	3	1	0	1	3	0	1	0	4	2	2	0	0	0	0	0	0	19	1	3	0	2	0	0	0	0	0	2	0	2	0	0	0	1	1	0	0	0
root|Viruses|Duplodnaviria|Heunggongvirae|Uroviricota|Caudoviricetes|Caudovirales|Autographiviridae|Ayaqvirus	G	2731930	Viruses	Ayaqvirus	0	0	0	0	0	0	1	0	0	0	0	0	1	0	0	0	0	0	1	0	0	0	0	0	0	0	1	2	0	0	0	0	0	2	0	0	0	0	0	0	0	0	0	0	0
root|Viruses|Duplodnaviria|Heunggongvirae|Uroviricota|Caudoviricetes|Caudovirales|Autographiviridae|Ayaqvirus|Ayaqvirus S45C18	S	2733893	Viruses	Ayaqvirus S45C18	0	0	0	0	0	0	1	0	0	0	0	0	1	0	0	0	0	0	1	0	0	0	0	0	0	0	1	2	0	0	0	0	0	2	0	0	0	0	0	0	0	0	0	0	0
root|Viruses|Duplodnaviria|Heunggongvirae|Uroviricota|Caudoviricetes|Caudovirales|Autographiviridae|Ayaqvirus|Ayaqvirus S45C18|uncultured phage_MedDCM-OCT-S45-C18	S1	2741072	Viruses	uncultured phage_MedDCM-OCT-S45-C18	0	0	0	0	0	0	1	0	0	0	0	0	1	0	0	0	0	0	1	0	0	0	0	0	0	0	1	2	0	0	0	0	0	2	0	0	0	0	0	0	0	0	0	0	0
root|Viruses|Duplodnaviria|Heunggongvirae|Uroviricota|Caudoviricetes|Caudovirales|Autographiviridae|Banchanvirus	G	2731931	Viruses	Banchanvirus	0	0	1	0	0	0	0	0	0	0	1	0	0	0	0	0	0	0	1	0	0	2	0	0	0	0	0	1	1	0	0	0	0	0	0	0	0	0	0	0	0	0	0	0	0
root|Viruses|Duplodnaviria|Heunggongvirae|Uroviricota|Caudoviricetes|Caudovirales|Autographiviridae|Banchanvirus|Prochlorococcus virus SS120-1	S	2733894	Viruses	Prochlorococcus virus SS120-1	0	0	1	0	0	0	0	0	0	0	1	0	0	0	0	0	0	0	1	0	0	2	0	0	0	0	0	1	1	0	0	0	0	0	0	0	0	0	0	0	0	0	0	0	0
root|Viruses|Duplodnaviria|Heunggongvirae|Uroviricota|Caudoviricetes|Caudovirales|Autographiviridae|Banchanvirus|Prochlorococcus virus SS120-1|Cyanophage SS120-1	S1	616674	Viruses	Cyanophage SS120-1	0	0	1	0	0	0	0	0	0	0	1	0	0	0	0	0	0	0	1	0	0	2	0	0	0	0	0	1	1	0	0	0	0	0	0	0	0	0	0	0	0	0	0	0	0
root|Viruses|Duplodnaviria|Heunggongvirae|Uroviricota|Caudoviricetes|Caudovirales|Autographiviridae|Beijerinckvirinae	F1	2731645	Viruses	Beijerinckvirinae	0	2	4	1	2	1	0	0	1	0	5	0	0	2	0	0	1	4	1	1	0	0	1	1	0	0	1	1	0	0	0	3	8	6	0	0	6	1	0	0	1	3	0	3	0
root|Viruses|Duplodnaviria|Heunggongvirae|Uroviricota|Caudoviricetes|Caudovirales|Autographiviridae|Beijerinckvirinae|Daemvirus	G	2731672	Viruses	Daemvirus	0	2	0	0	0	0	0	0	0	0	0	0	0	1	0	0	0	0	0	0	0	0	0	0	0	0	0	0	0	0	0	0	0	0	0	0	0	0	0	0	0	0	0	0	0
root|Viruses|Duplodnaviria|Heunggongvirae|Uroviricota|Caudoviricetes|Caudovirales|Autographiviridae|Beijerinckvirinae|Daemvirus|Acinetobacter virus Acibel007	S	2733315	Viruses	Acinetobacter virus Acibel007	0	2	0	0	0	0	0	0	0	0	0	0	0	1	0	0	0	0	0	0	0	0	0	0	0	0	0	0	0	0	0	0	0	0	0	0	0	0	0	0	0	0	0	0	0
root|Viruses|Duplodnaviria|Heunggongvirae|Uroviricota|Caudoviricetes|Caudovirales|Autographiviridae|Beijerinckvirinae|Daemvirus|Acinetobacter virus Acibel007	S1	1481187	Viruses	Acinetobacter phage vB_AbaP_Acibel007	0	2	0	0	0	0	0	0	0	0	0	0	0	1	0	0	0	0	0	0	0	0	0	0	0	0	0	0	0	0	0	0	0	0	0	0	0	0	0	0	0	0	0	0	0
root|Viruses|Duplodnaviria|Heunggongvirae|Uroviricota|Caudoviricetes|Caudovirales|Autographiviridae|Beijerinckvirinae|Friunavirus	G	1985711	Viruses	Friunavirus	0	0	4	1	2	1	0	0	1	0	5	0	0	1	0	0	0	2	1	1	0	0	1	0	0	0	1	1	0	0	0	3	8	6	0	0	6	1	0	0	0	3	0	3	0
root|Viruses|Duplodnaviria|Heunggongvirae|Uroviricota|Caudoviricetes|Caudovirales|Autographiviridae|Beijerinckvirinae|Friunavirus|Acinetobacter virus AB3	S	1985718	Viruses	Acinetobacter virus AB3	0	0	0	0	0	0	0	0	0	0	0	0	0	0	0	0	0	0	0	0	0	0	0	0	0	0	0	0	0	0	0	3	6	0	0	0	0	0	0	0	0	0	0	0	0
root|Viruses|Duplodnaviria|Heunggongvirae|Uroviricota|Caudoviricetes|Caudovirales|Autographiviridae|Beijerinckvirinae|Friunavirus|Acinetobacter virus AB3	S1	1273713	Viruses	Acinetobacter phage AB3	0	0	0	0	0	0	0	0	0	0	0	0	0	0	0	0	0	0	0	0	0	0	0	0	0	0	0	0	0	0	0	3	6	0	0	0	0	0	0	0	0	0	0	0	0
root|Viruses|Duplodnaviria|Heunggongvirae|Uroviricota|Caudoviricetes|Caudovirales|Autographiviridae|Beijerinckvirinae|Friunavirus|Acinetobacter virus Aci08	S	2733318	Viruses	Acinetobacter virus Aci08	0	0	1	0	0	0	0	0	0	0	0	0	0	0	0	0	0	0	0	0	0	0	0	0	0	0	0	0	0	0	0	0	0	0	0	0	0	0	0	0	0	0	0	0	0
root|Viruses|Duplodnaviria|Heunggongvirae|Uroviricota|Caudoviricetes|Caudovirales|Autographiviridae|Beijerinckvirinae|Friunavirus|Acinetobacter virus Aci08	S1	2315601	Viruses	Acinetobacter phage vB_AbaP_B09_Aci08	0	0	1	0	0	0	0	0	0	0	0	0	0	0	0	0	0	0	0	0	0	0	0	0	0	0	0	0	0	0	0	0	0	0	0	0	0	0	0	0	0	0	0	0	0
root|Viruses|Duplodnaviria|Heunggongvirae|Uroviricota|Caudoviricetes|Caudovirales|Autographiviridae|Beijerinckvirinae|Friunavirus|Acinetobacter virus Fri1	S	1985712	Viruses	Acinetobacter virus Fri1	0	0	0	0	1	0	0	0	0	0	0	0	0	0	0	0	0	0	0	0	0	0	0	0	0	0	0	0	0	0	0	0	0	0	0	0	0	0	0	0	0	0	0	0	0
root|Viruses|Duplodnaviria|Heunggongvirae|Uroviricota|Caudoviricetes|Caudovirales|Autographiviridae|Beijerinckvirinae|Friunavirus|Acinetobacter virus Fri1	S1	1647373	Viruses	Acinetobacter phage Fri1	0	0	0	0	1	0	0	0	0	0	0	0	0	0	0	0	0	0	0	0	0	0	0	0	0	0	0	0	0	0	0	0	0	0	0	0	0	0	0	0	0	0	0	0	0
root|Viruses|Duplodnaviria|Heunggongvirae|Uroviricota|Caudoviricetes|Caudovirales|Autographiviridae|Beijerinckvirinae|Friunavirus|Acinetobacter virus IME200	S	1985713	Viruses	Acinetobacter virus IME200	0	0	0	0	0	0	0	0	0	0	1	0	0	0	0	0	0	1	0	0	0	0	0	0	0	0	0	1	0	0	0	0	0	0	0	0	0	0	0	0	0	0	0	0	0
root|Viruses|Duplodnaviria|Heunggongvirae|Uroviricota|Caudoviricetes|Caudovirales|Autographiviridae|Beijerinckvirinae|Friunavirus|Acinetobacter virus IME200	S1	1735582	Viruses	Acinetobacter phage IME200	0	0	0	0	0	0	0	0	0	0	1	0	0	0	0	0	0	1	0	0	0	0	0	0	0	0	0	1	0	0	0	0	0	0	0	0	0	0	0	0	0	0	0	0	0
root|Viruses|Duplodnaviria|Heunggongvirae|Uroviricota|Caudoviricetes|Caudovirales|Autographiviridae|Beijerinckvirinae|Friunavirus|Acinetobacter virus PD6A3	S	1985716	Viruses	Acinetobacter virus PD6A3	0	0	1	0	0	0	0	0	0	0	0	0	0	0	0	0	0	0	0	0	0	0	0	0	0	0	0	0	0	0	0	0	0	0	0	0	0	0	0	0	0	0	0	0	0
root|Viruses|Duplodnaviria|Heunggongvirae|Uroviricota|Caudoviricetes|Caudovirales|Autographiviridae|Beijerinckvirinae|Friunavirus|Acinetobacter virus PD6A3	S1	1701807	Viruses	Acinetobacter phage vB_AbaP_PD-6A3	0	0	1	0	0	0	0	0	0	0	0	0	0	0	0	0	0	0	0	0	0	0	0	0	0	0	0	0	0	0	0	0	0	0	0	0	0	0	0	0	0	0	0	0	0
root|Viruses|Duplodnaviria|Heunggongvirae|Uroviricota|Caudoviricetes|Caudovirales|Autographiviridae|Beijerinckvirinae|Friunavirus|Acinetobacter virus SH-Ab 15519	S	2560271	Viruses	Acinetobacter virus SH-Ab 15519	0	0	0	0	1	0	0	0	0	0	0	0	0	0	0	0	0	0	0	0	0	0	0	0	0	0	0	0	0	0	0	0	0	0	0	0	0	0	0	0	0	0	0	0	0
root|Viruses|Duplodnaviria|Heunggongvirae|Uroviricota|Caudoviricetes|Caudovirales|Autographiviridae|Beijerinckvirinae|Friunavirus|Acinetobacter virus SH-Ab 15519	S1	1916127	Viruses	Acinetobacter phage SH-Ab 15519	0	0	0	0	1	0	0	0	0	0	0	0	0	0	0	0	0	0	0	0	0	0	0	0	0	0	0	0	0	0	0	0	0	0	0	0	0	0	0	0	0	0	0	0	0
root|Viruses|Duplodnaviria|Heunggongvirae|Uroviricota|Caudoviricetes|Caudovirales|Autographiviridae|Beijerinckvirinae|Friunavirus|Acinetobacter virus SWHAb1	S	2733319	Viruses	Acinetobacter virus SWHAb1	0	0	1	0	0	1	0	0	0	0	0	0	0	0	0	0	0	0	0	0	0	0	0	0	0	0	0	0	0	0	0	0	0	0	0	0	0	0	0	0	0	0	0	0	0
root|Viruses|Duplodnaviria|Heunggongvirae|Uroviricota|Caudoviricetes|Caudovirales|Autographiviridae|Beijerinckvirinae|Friunavirus|Acinetobacter virus SWHAb1	S1	2053604	Viruses	Acinetobacter phage SWH-Ab-1	0	0	1	0	0	1	0	0	0	0	0	0	0	0	0	0	0	0	0	0	0	0	0	0	0	0	0	0	0	0	0	0	0	0	0	0	0	0	0	0	0	0	0	0	0
root|Viruses|Duplodnaviria|Heunggongvirae|Uroviricota|Caudoviricetes|Caudovirales|Autographiviridae|Beijerinckvirinae|Friunavirus|unclassified Friunavirus	G1	2171721	Viruses	unclassified Friunavirus	0	0	1	1	0	0	0	0	0	0	4	0	0	1	0	0	0	0	0	0	0	0	0	0	0	0	0	0	0	0	0	0	0	0	0	0	0	0	0	0	0	0	0	0	0
root|Viruses|Duplodnaviria|Heunggongvirae|Uroviricota|Caudoviricetes|Caudovirales|Autographiviridae|Beijerinckvirinae|Friunavirus|unclassified Friunavirus	S	1698439	Viruses	Acinetobacter phage phiAB6	0	0	0	0	0	0	0	0	0	0	2	0	0	0	0	0	0	0	0	0	0	0	0	0	0	0	0	0	0	0	0	0	0	0	0	0	0	0	0	0	0	0	0	0	0
root|Viruses|Duplodnaviria|Heunggongvirae|Uroviricota|Caudoviricetes|Caudovirales|Autographiviridae|Beijerinckvirinae|Friunavirus|unclassified Friunavirus	S	2016049	Viruses	Acinetobacter phage vB_AbaP_B1	0	0	0	1	0	0	0	0	0	0	0	0	0	0	0	0	0	0	0	0	0	0	0	0	0	0	0	0	0	0	0	0	0	0	0	0	0	0	0	0	0	0	0	0	0
root|Viruses|Duplodnaviria|Heunggongvirae|Uroviricota|Caudoviricetes|Caudovirales|Autographiviridae|Beijerinckvirinae|Friunavirus|unclassified Friunavirus	S	2016053	Viruses	Acinetobacter phage vB_ApiP_P2	0	0	0	0	0	0	0	0	0	0	0	0	0	1	0	0	0	0	0	0	0	0	0	0	0	0	0	0	0	0	0	0	0	0	0	0	0	0	0	0	0	0	0	0	0
root|Viruses|Duplodnaviria|Heunggongvirae|Uroviricota|Caudoviricetes|Caudovirales|Autographiviridae|Beijerinckvirinae|Friunavirus|unclassified Friunavirus	S	2126803	Viruses	Acinetobacter phage vB_AbaP_D2	0	0	1	0	0	0	0	0	0	0	2	0	0	0	0	0	0	0	0	0	0	0	0	0	0	0	0	0	0	0	0	0	0	0	0	0	0	0	0	0	0	0	0	0	0
root|Viruses|Duplodnaviria|Heunggongvirae|Uroviricota|Caudoviricetes|Caudovirales|Autographiviridae|Beijerinckvirinae|Pettyvirus	G	2731671	Viruses	Pettyvirus	0	0	0	0	0	0	0	0	0	0	0	0	0	0	0	0	1	2	0	0	0	0	0	1	0	0	0	0	0	0	0	0	0	0	0	0	0	0	0	0	1	0	0	0	0
root|Viruses|Duplodnaviria|Heunggongvirae|Uroviricota|Caudoviricetes|Caudovirales|Autographiviridae|Beijerinckvirinae|Pettyvirus|Acinetobacter virus Petty	S	2733321	Viruses	Acinetobacter virus Petty	0	0	0	0	0	0	0	0	0	0	0	0	0	0	0	0	1	2	0	0	0	0	0	1	0	0	0	0	0	0	0	0	0	0	0	0	0	0	0	0	1	0	0	0	0
root|Viruses|Duplodnaviria|Heunggongvirae|Uroviricota|Caudoviricetes|Caudovirales|Autographiviridae|Beijerinckvirinae|Pettyvirus|Acinetobacter virus Petty	S1	1406779	Viruses	Acinetobacter phage Petty	0	0	0	0	0	0	0	0	0	0	0	0	0	0	0	0	1	2	0	0	0	0	0	1	0	0	0	0	0	0	0	0	0	0	0	0	0	0	0	0	1	0	0	0	0
root|Viruses|Duplodnaviria|Heunggongvirae|Uroviricota|Caudoviricetes|Caudovirales|Autographiviridae|Bifseptvirus	G	2560102	Viruses	Bifseptvirus	1	0	0	0	2	0	0	1	0	0	0	0	1	0	0	0	1	0	0	0	0	0	0	0	0	0	0	0	0	1	0	0	0	0	0	1	2	0	0	0	0	0	0	0	0
root|Viruses|Duplodnaviria|Heunggongvirae|Uroviricota|Caudoviricetes|Caudovirales|Autographiviridae|Bifseptvirus|Pseudomonas virus Andromeda	S	2560655	Viruses	Pseudomonas virus Andromeda	0	0	0	0	0	0	0	0	0	0	0	0	0	0	0	0	1	0	0	0	0	0	0	0	0	0	0	0	0	1	0	0	0	0	0	0	0	0	0	0	0	0	0	0	0
root|Viruses|Duplodnaviria|Heunggongvirae|Uroviricota|Caudoviricetes|Caudovirales|Autographiviridae|Bifseptvirus|Pseudomonas virus Andromeda|Pseudomonas phage Andromeda	S1	1873949	Viruses	Pseudomonas phage Andromeda	0	0	0	0	0	0	0	0	0	0	0	0	0	0	0	0	1	0	0	0	0	0	0	0	0	0	0	0	0	1	0	0	0	0	0	0	0	0	0	0	0	0	0	0	0
root|Viruses|Duplodnaviria|Heunggongvirae|Uroviricota|Caudoviricetes|Caudovirales|Autographiviridae|Bifseptvirus|Pseudomonas virus Bf7	S	2560657	Viruses	Pseudomonas virus Bf7	1	0	0	0	2	0	0	1	0	0	0	0	1	0	0	0	0	0	0	0	0	0	0	0	0	0	0	0	0	0	0	0	0	0	0	1	2	0	0	0	0	0	0	0	0
root|Viruses|Duplodnaviria|Heunggongvirae|Uroviricota|Caudoviricetes|Caudovirales|Autographiviridae|Bifseptvirus|Pseudomonas virus Bf7|Pseudomonas phage Bf7	S1	1100790	Viruses	Pseudomonas phage Bf7	1	0	0	0	2	0	0	1	0	0	0	0	1	0	0	0	0	0	0	0	0	0	0	0	0	0	0	0	0	0	0	0	0	0	0	1	2	0	0	0	0	0	0	0	0
root|Viruses|Duplodnaviria|Heunggongvirae|Uroviricota|Caudoviricetes|Caudovirales|Autographiviridae|Bonnellvirus	G	2731932	Viruses	Bonnellvirus	0	0	0	0	1	1	0	0	0	0	0	1	0	0	0	0	0	0	1	0	0	0	0	0	0	1	0	0	0	0	0	2	0	0	0	0	0	0	0	0	0	0	0	0	0
root|Viruses|Duplodnaviria|Heunggongvirae|Uroviricota|Caudoviricetes|Caudovirales|Autographiviridae|Bonnellvirus|Escherichia virus Lidtsur	S	2733896	Viruses	Escherichia virus Lidtsur	0	0	0	0	1	1	0	0	0	0	0	1	0	0	0	0	0	0	1	0	0	0	0	0	0	1	0	0	0	0	0	2	0	0	0	0	0	0	0	0	0	0	0	0	0
root|Viruses|Duplodnaviria|Heunggongvirae|Uroviricota|Caudoviricetes|Caudovirales|Autographiviridae|Bonnellvirus|Escherichia virus Lidtsur|Escherichia phage Lidtsur	S1	2562235	Viruses	Escherichia phage Lidtsur	0	0	0	0	1	1	0	0	0	0	0	1	0	0	0	0	0	0	1	0	0	0	0	0	0	1	0	0	0	0	0	2	0	0	0	0	0	0	0	0	0	0	0	0	0
root|Viruses|Duplodnaviria|Heunggongvirae|Uroviricota|Caudoviricetes|Caudovirales|Autographiviridae|Cheungvirus	G	2731933	Viruses	Cheungvirus	0	0	0	0	0	0	0	0	0	1	0	1	1	3	0	0	0	2	0	1	0	0	0	0	0	0	0	0	0	0	0	0	0	0	0	0	1	0	0	0	0	0	0	0	0
root|Viruses|Duplodnaviria|Heunggongvirae|Uroviricota|Caudoviricetes|Caudovirales|Autographiviridae|Cheungvirus|Prochlorococcus virus NATL1A7	S	2733897	Viruses	Prochlorococcus virus NATL1A7	0	0	0	0	0	0	0	0	0	1	0	1	1	3	0	0	0	2	0	1	0	0	0	0	0	0	0	0	0	0	0	0	0	0	0	0	1	0	0	0	0	0	0	0	0
root|Viruses|Duplodnaviria|Heunggongvirae|Uroviricota|Caudoviricetes|Caudovirales|Autographiviridae|Cheungvirus|Prochlorococcus virus NATL1A7|Cyanophage NATL1A-7	S1	445693	Viruses	Cyanophage NATL1A-7	0	0	0	0	0	0	0	0	0	1	0	1	1	3	0	0	0	2	0	1	0	0	0	0	0	0	0	0	0	0	0	0	0	0	0	0	1	0	0	0	0	0	0	0	0
root|Viruses|Duplodnaviria|Heunggongvirae|Uroviricota|Caudoviricetes|Caudovirales|Autographiviridae|Colwellvirinae	F1	2731646	Viruses	Colwellvirinae	6	3	1	2	0	0	2	3	1	1	5	0	2	3	0	0	0	0	3	1	0	4	0	1	0	1	0	2	1	3	0	0	1	2	0	0	1	0	0	1	1	0	0	0	0
root|Viruses|Duplodnaviria|Heunggongvirae|Uroviricota|Caudoviricetes|Caudovirales|Autographiviridae|Colwellvirinae|Kaohsiungvirus	G	2731674	Viruses	Kaohsiungvirus	1	0	0	0	0	0	0	0	0	0	1	0	1	1	0	0	0	0	0	0	0	0	0	0	0	0	0	0	0	0	0	0	0	0	0	0	0	0	0	1	0	0	0	0	0
root|Viruses|Duplodnaviria|Heunggongvirae|Uroviricota|Caudoviricetes|Caudovirales|Autographiviridae|Colwellvirinae|Kaohsiungvirus|Vibrio virus Vp670	S	2733325	Viruses	Vibrio virus Vp670	0	0	0	0	0	0	0	0	0	0	0	0	0	0	0	0	0	0	0	0	0	0	0	0	0	0	0	0	0	0	0	0	0	0	0	0	0	0	0	1	0	0	0	0	0
root|Viruses|Duplodnaviria|Heunggongvirae|Uroviricota|Caudoviricetes|Caudovirales|Autographiviridae|Colwellvirinae|Kaohsiungvirus|Vibrio virus Vp670	S1	1932890	Viruses	Vibrio phage Vp670	0	0	0	0	0	0	0	0	0	0	0	0	0	0	0	0	0	0	0	0	0	0	0	0	0	0	0	0	0	0	0	0	0	0	0	0	0	0	0	1	0	0	0	0	0
root|Viruses|Duplodnaviria|Heunggongvirae|Uroviricota|Caudoviricetes|Caudovirales|Autographiviridae|Colwellvirinae|Murciavirus	G	2731675	Viruses	Murciavirus	1	0	1	0	0	0	0	2	0	0	0	0	0	0	0	0	0	0	0	0	0	3	0	0	0	0	0	0	0	0	0	0	0	0	0	0	0	0	0	0	0	0	0	0	0
root|Viruses|Duplodnaviria|Heunggongvirae|Uroviricota|Caudoviricetes|Caudovirales|Autographiviridae|Colwellvirinae|Murciavirus|Marinomonas virus CB5A	S	2733326	Viruses	Marinomonas virus CB5A	1	0	1	0	0	0	0	1	0	0	0	0	0	0	0	0	0	0	0	0	0	0	0	0	0	0	0	0	0	0	0	0	0	0	0	0	0	0	0	0	0	0	0	0	0
root|Viruses|Duplodnaviria|Heunggongvirae|Uroviricota|Caudoviricetes|Caudovirales|Autographiviridae|Colwellvirinae|Murciavirus|Marinomonas virus CB5A	S1	2022859	Viruses	Marinomonas phage CB5A	1	0	1	0	0	0	0	1	0	0	0	0	0	0	0	0	0	0	0	0	0	0	0	0	0	0	0	0	0	0	0	0	0	0	0	0	0	0	0	0	0	0	0	0	0
root|Viruses|Duplodnaviria|Heunggongvirae|Uroviricota|Caudoviricetes|Caudovirales|Autographiviridae|Colwellvirinae|Murciavirus|Marinomonas virus CPP1m	S	2733327	Viruses	Marinomonas virus CPP1m	0	0	0	0	0	0	0	0	0	0	0	0	0	0	0	0	0	0	0	0	0	3	0	0	0	0	0	0	0	0	0	0	0	0	0	0	0	0	0	0	0	0	0	0	0
root|Viruses|Duplodnaviria|Heunggongvirae|Uroviricota|Caudoviricetes|Caudovirales|Autographiviridae|Colwellvirinae|Murciavirus|Marinomonas virus CPP1m	S1	1965370	Viruses	Marinomonas phage CPP1m	0	0	0	0	0	0	0	0	0	0	0	0	0	0	0	0	0	0	0	0	0	3	0	0	0	0	0	0	0	0	0	0	0	0	0	0	0	0	0	0	0	0	0	0	0
root|Viruses|Duplodnaviria|Heunggongvirae|Uroviricota|Caudoviricetes|Caudovirales|Autographiviridae|Colwellvirinae|Uliginvirus	G	2731677	Viruses	Uliginvirus	4	3	0	2	0	0	2	1	1	1	4	0	1	2	0	0	0	0	3	1	0	1	0	1	0	1	0	2	1	3	0	0	1	2	0	0	1	0	0	0	1	0	0	0	0
root|Viruses|Duplodnaviria|Heunggongvirae|Uroviricota|Caudoviricetes|Caudovirales|Autographiviridae|Colwellvirinae|Uliginvirus|Pseudomonas virus Achelous	S	2733329	Viruses	Pseudomonas virus Achelous	0	0	0	1	0	0	0	0	0	0	0	0	0	0	0	0	0	0	0	0	0	1	0	0	0	0	0	0	1	0	0	0	1	2	0	0	1	0	0	0	0	0	0	0	0
root|Viruses|Duplodnaviria|Heunggongvirae|Uroviricota|Caudoviricetes|Caudovirales|Autographiviridae|Colwellvirinae|Uliginvirus|Pseudomonas virus Achelous	S1	2163982	Viruses	Pseudomonas phage Achelous	0	0	0	1	0	0	0	0	0	0	0	0	0	0	0	0	0	0	0	0	0	1	0	0	0	0	0	0	1	0	0	0	1	2	0	0	1	0	0	0	0	0	0	0	0
root|Viruses|Duplodnaviria|Heunggongvirae|Uroviricota|Caudoviricetes|Caudovirales|Autographiviridae|Colwellvirinae|Uliginvirus|Pseudomonas virus Alpheus	S	2733330	Viruses	Pseudomonas virus Alpheus	1	1	0	1	0	0	1	0	1	1	4	0	1	0	0	0	0	0	2	0	0	0	0	1	0	0	0	2	0	2	0	0	0	0	0	0	0	0	0	0	1	0	0	0	0
root|Viruses|Duplodnaviria|Heunggongvirae|Uroviricota|Caudoviricetes|Caudovirales|Autographiviridae|Colwellvirinae|Uliginvirus|Pseudomonas virus Alpheus	S1	2163983	Viruses	Pseudomonas phage Alpheus	1	1	0	1	0	0	1	0	1	1	4	0	1	0	0	0	0	0	2	0	0	0	0	1	0	0	0	2	0	2	0	0	0	0	0	0	0	0	0	0	1	0	0	0	0
root|Viruses|Duplodnaviria|Heunggongvirae|Uroviricota|Caudoviricetes|Caudovirales|Autographiviridae|Colwellvirinae|Uliginvirus|Pseudomonas virus Nerthus	S	2733331	Viruses	Pseudomonas virus Nerthus	1	1	0	0	0	0	1	1	0	0	0	0	0	0	0	0	0	0	1	1	0	0	0	0	0	1	0	0	0	0	0	0	0	0	0	0	0	0	0	0	0	0	0	0	0
root|Viruses|Duplodnaviria|Heunggongvirae|Uroviricota|Caudoviricetes|Caudovirales|Autographiviridae|Colwellvirinae|Uliginvirus|Pseudomonas virus Nerthus	S1	2163984	Viruses	Pseudomonas phage Nerthus	1	1	0	0	0	0	1	1	0	0	0	0	0	0	0	0	0	0	1	1	0	0	0	0	0	1	0	0	0	0	0	0	0	0	0	0	0	0	0	0	0	0	0	0	0
root|Viruses|Duplodnaviria|Heunggongvirae|Uroviricota|Caudoviricetes|Caudovirales|Autographiviridae|Colwellvirinae|Uliginvirus|Pseudomonas virus uligo	S	2733333	Viruses	Pseudomonas virus uligo	2	1	0	0	0	0	0	0	0	0	0	0	0	2	0	0	0	0	0	0	0	0	0	0	0	0	0	0	0	1	0	0	0	0	0	0	0	0	0	0	0	0	0	0	0
root|Viruses|Duplodnaviria|Heunggongvirae|Uroviricota|Caudoviricetes|Caudovirales|Autographiviridae|Colwellvirinae|Uliginvirus|Pseudomonas virus uligo	S1	2048979	Viruses	Pseudomonas phage uligo	2	1	0	0	0	0	0	0	0	0	0	0	0	2	0	0	0	0	0	0	0	0	0	0	0	0	0	0	0	1	0	0	0	0	0	0	0	0	0	0	0	0	0	0	0
root|Viruses|Duplodnaviria|Heunggongvirae|Uroviricota|Caudoviricetes|Caudovirales|Autographiviridae|Corkvirinae	F1	2731647	Viruses	Corkvirinae	2	3	2	4	4	3	4	3	6	2	4	3	5	2	1	1	1	1	0	0	0	1	1	1	1	1	2	1	3	0	0	1	2	7	0	1	15	0	0	0	0	23	0	0	6
root|Viruses|Duplodnaviria|Heunggongvirae|Uroviricota|Caudoviricetes|Caudovirales|Autographiviridae|Corkvirinae|Kantovirus	G	2732920	Viruses	Kantovirus	1	0	0	0	3	0	0	0	1	0	1	0	1	0	0	0	0	0	0	0	0	0	0	0	0	0	0	0	0	0	0	0	2	7	0	0	15	0	0	0	0	23	0	0	6
root|Viruses|Duplodnaviria|Heunggongvirae|Uroviricota|Caudoviricetes|Caudovirales|Autographiviridae|Corkvirinae|Kantovirus|Pseudomonas virus C171	S	2733334	Viruses	Pseudomonas virus C171	1	0	0	0	3	0	0	0	1	0	1	0	1	0	0	0	0	0	0	0	0	0	0	0	0	0	0	0	0	0	0	0	2	7	0	0	15	0	0	0	0	23	0	0	6
root|Viruses|Duplodnaviria|Heunggongvirae|Uroviricota|Caudoviricetes|Caudovirales|Autographiviridae|Corkvirinae|Kantovirus|Pseudomonas virus C171	S1	1777063	Viruses	Pseudomonas phage YMC11/06/C171_PPU_BP	1	0	0	0	3	0	0	0	1	0	1	0	1	0	0	0	0	0	0	0	0	0	0	0	0	0	0	0	0	0	0	0	2	7	0	0	15	0	0	0	0	23	0	0	6
root|Viruses|Duplodnaviria|Heunggongvirae|Uroviricota|Caudoviricetes|Caudovirales|Autographiviridae|Corkvirinae|Kotilavirus	G	2732921	Viruses	Kotilavirus	1	3	2	4	0	2	4	3	5	2	2	2	4	0	0	1	1	1	0	0	0	1	1	1	1	1	2	1	2	0	0	0	0	0	0	1	0	0	0	0	0	0	0	0	0
root|Viruses|Duplodnaviria|Heunggongvirae|Uroviricota|Caudoviricetes|Caudovirales|Autographiviridae|Corkvirinae|Kotilavirus|Pectobacterium virus PP16	S	2733335	Viruses	Pectobacterium virus PP16	1	3	2	3	0	2	4	3	5	1	2	2	4	0	0	1	0	1	0	0	0	1	1	1	0	1	1	1	2	0	0	0	0	0	0	1	0	0	0	0	0	0	0	0	0
root|Viruses|Duplodnaviria|Heunggongvirae|Uroviricota|Caudoviricetes|Caudovirales|Autographiviridae|Corkvirinae|Kotilavirus|Pectobacterium virus PP16	S1	1873958	Viruses	Pectobacterium phage PP16	1	3	2	3	0	2	4	3	5	1	2	2	4	0	0	1	0	1	0	0	0	1	1	1	0	1	1	1	2	0	0	0	0	0	0	1	0	0	0	0	0	0	0	0	0
root|Viruses|Duplodnaviria|Heunggongvirae|Uroviricota|Caudoviricetes|Caudovirales|Autographiviridae|Corkvirinae|Kotilavirus|Pectobacterium virus PPWS2	S	2733337	Viruses	Pectobacterium virus PPWS2	0	0	0	0	0	0	0	0	0	0	0	0	0	0	0	0	0	0	0	0	0	0	0	0	1	0	0	0	0	0	0	0	0	0	0	0	0	0	0	0	0	0	0	0	0
root|Viruses|Duplodnaviria|Heunggongvirae|Uroviricota|Caudoviricetes|Caudovirales|Autographiviridae|Corkvirinae|Kotilavirus|Pectobacterium virus PPWS2	S1	2153295	Viruses	Pectobacterium phage PPWS2	0	0	0	0	0	0	0	0	0	0	0	0	0	0	0	0	0	0	0	0	0	0	0	0	1	0	0	0	0	0	0	0	0	0	0	0	0	0	0	0	0	0	0	0	0
root|Viruses|Duplodnaviria|Heunggongvirae|Uroviricota|Caudoviricetes|Caudovirales|Autographiviridae|Corkvirinae|Phimunavirus	G	2560202	Viruses	Phimunavirus	0	0	0	0	1	1	0	0	0	0	1	1	0	2	1	0	0	0	0	0	0	0	0	0	0	0	0	0	1	0	0	1	0	0	0	0	0	0	0	0	0	0	0	0	0
root|Viruses|Duplodnaviria|Heunggongvirae|Uroviricota|Caudoviricetes|Caudovirales|Autographiviridae|Corkvirinae|Phimunavirus|Pectobacterium virus PP90	S	2560632	Viruses	Pectobacterium virus PP90	0	0	0	0	0	0	0	0	0	0	0	0	0	1	0	0	0	0	0	0	0	0	0	0	0	0	0	0	0	0	0	0	0	0	0	0	0	0	0	0	0	0	0	0	0
root|Viruses|Duplodnaviria|Heunggongvirae|Uroviricota|Caudoviricetes|Caudovirales|Autographiviridae|Corkvirinae|Phimunavirus|Pectobacterium virus PP90	S1	1873959	Viruses	Pectobacterium phage PP90	0	0	0	0	0	0	0	0	0	0	0	0	0	1	0	0	0	0	0	0	0	0	0	0	0	0	0	0	0	0	0	0	0	0	0	0	0	0	0	0	0	0	0	0	0
root|Viruses|Duplodnaviria|Heunggongvirae|Uroviricota|Caudoviricetes|Caudovirales|Autographiviridae|Corkvirinae|Phimunavirus|Pectobacterium virus fM1	S	2560634	Viruses	Pectobacterium virus fM1	0	0	0	0	0	0	0	0	0	0	1	0	0	0	0	0	0	0	0	0	0	0	0	0	0	0	0	0	1	0	0	0	0	0	0	0	0	0	0	0	0	0	0	0	0
root|Viruses|Duplodnaviria|Heunggongvirae|Uroviricota|Caudoviricetes|Caudovirales|Autographiviridae|Corkvirinae|Phimunavirus|Pectobacterium virus fM1	S1	1211386	Viruses	Pectobacterium phage PhiM1	0	0	0	0	0	0	0	0	0	0	1	0	0	0	0	0	0	0	0	0	0	0	0	0	0	0	0	0	1	0	0	0	0	0	0	0	0	0	0	0	0	0	0	0	0
root|Viruses|Duplodnaviria|Heunggongvirae|Uroviricota|Caudoviricetes|Caudovirales|Autographiviridae|Cuernavacavirus	G	2731935	Viruses	Cuernavacavirus	1	0	1	0	0	0	1	0	0	0	0	0	0	0	0	0	0	0	0	0	0	0	0	0	0	0	0	0	0	0	0	0	0	0	0	0	0	0	0	0	0	0	0	0	0
root|Viruses|Duplodnaviria|Heunggongvirae|Uroviricota|Caudoviricetes|Caudovirales|Autographiviridae|Cyclitvirus	G	2731936	Viruses	Cyclitvirus	1	0	0	0	0	0	0	0	0	0	0	0	0	0	0	0	0	0	0	0	0	0	0	1	0	1	0	0	0	0	0	1	2	0	0	0	0	0	0	1	0	3	0	0	0
root|Viruses|Duplodnaviria|Heunggongvirae|Uroviricota|Caudoviricetes|Caudovirales|Autographiviridae|Cyclitvirus|Vibrio virus Cyclit	S	2733902	Viruses	Vibrio virus Cyclit	1	0	0	0	0	0	0	0	0	0	0	0	0	0	0	0	0	0	0	0	0	0	0	1	0	1	0	0	0	0	0	1	2	0	0	0	0	0	0	1	0	3	0	0	0
root|Viruses|Duplodnaviria|Heunggongvirae|Uroviricota|Caudoviricetes|Caudovirales|Autographiviridae|Cyclitvirus|Vibrio virus Cyclit|Vibrio phage 1.204.O._10N.222.46.F12	S1	1881263	Viruses	Vibrio phage 1.204.O._10N.222.46.F12	1	0	0	0	0	0	0	0	0	0	0	0	0	0	0	0	0	0	0	0	0	0	0	1	0	1	0	0	0	0	0	1	2	0	0	0	0	0	0	1	0	3	0	0	0
root|Viruses|Duplodnaviria|Heunggongvirae|Uroviricota|Caudoviricetes|Caudovirales|Autographiviridae|Ermolevavirus	G	2731937	Viruses	Ermolevavirus	2	2	2	2	1	3	1	0	0	0	2	0	0	0	0	0	0	1	0	0	1	0	1	0	0	0	0	2	1	2	0	0	2	0	0	0	0	0	1	0	0	0	0	0	0
root|Viruses|Duplodnaviria|Heunggongvirae|Uroviricota|Caudoviricetes|Caudovirales|Autographiviridae|Ermolevavirus|Escherichia virus PGT2	S	2733903	Viruses	Escherichia virus PGT2	2	2	2	2	1	3	1	0	0	0	1	0	0	0	0	0	0	1	0	0	1	0	1	0	0	0	0	2	1	1	0	0	0	0	0	0	0	0	0	0	0	0	0	0	0
root|Viruses|Duplodnaviria|Heunggongvirae|Uroviricota|Caudoviricetes|Caudovirales|Autographiviridae|Ermolevavirus|Escherichia virus PGT2|Escherichia phage PGT2	S1	2047782	Viruses	Escherichia phage PGT2	2	2	2	2	1	3	1	0	0	0	1	0	0	0	0	0	0	1	0	0	1	0	1	0	0	0	0	2	1	1	0	0	0	0	0	0	0	0	0	0	0	0	0	0	0
root|Viruses|Duplodnaviria|Heunggongvirae|Uroviricota|Caudoviricetes|Caudovirales|Autographiviridae|Ermolevavirus|Escherichia virus PhiKT	S	2733904	Viruses	Escherichia virus PhiKT	0	0	0	0	0	0	0	0	0	0	0	0	0	0	0	0	0	0	0	0	0	0	0	0	0	0	0	0	0	1	0	0	2	0	0	0	0	0	1	0	0	0	0	0	0
root|Viruses|Duplodnaviria|Heunggongvirae|Uroviricota|Caudoviricetes|Caudovirales|Autographiviridae|Ermolevavirus|Escherichia virus PhiKT|Escherichia phage phiKT	S1	1141519	Viruses	Escherichia phage phiKT	0	0	0	0	0	0	0	0	0	0	0	0	0	0	0	0	0	0	0	0	0	0	0	0	0	0	0	0	0	1	0	0	2	0	0	0	0	0	1	0	0	0	0	0	0
root|Viruses|Duplodnaviria|Heunggongvirae|Uroviricota|Caudoviricetes|Caudovirales|Autographiviridae|Foturvirus	G	2731938	Viruses	Foturvirus	1	1	0	0	0	1	0	1	0	0	0	0	2	0	0	0	1	0	0	0	0	0	0	0	0	0	0	1	0	0	0	0	0	0	0	0	0	0	0	0	0	0	0	0	0
root|Viruses|Duplodnaviria|Heunggongvirae|Uroviricota|Caudoviricetes|Caudovirales|Autographiviridae|Foturvirus|Alteromonas virus H4-4	S	2733905	Viruses	Alteromonas virus H4-4	1	1	0	0	0	1	0	1	0	0	0	0	2	0	0	0	1	0	0	0	0	0	0	0	0	0	0	1	0	0	0	0	0	0	0	0	0	0	0	0	0	0	0	0	0
root|Viruses|Duplodnaviria|Heunggongvirae|Uroviricota|Caudoviricetes|Caudovirales|Autographiviridae|Foturvirus|Alteromonas virus H4-4|Alteromonas virus vB_AspP-H4/4	S1	2016032	Viruses	Alteromonas virus vB_AspP-H4/4	1	1	0	0	0	1	0	1	0	0	0	0	2	0	0	0	1	0	0	0	0	0	0	0	0	0	0	1	0	0	0	0	0	0	0	0	0	0	0	0	0	0	0	0	0
root|Viruses|Duplodnaviria|Heunggongvirae|Uroviricota|Caudoviricetes|Caudovirales|Autographiviridae|Foussvirus	G	2731939	Viruses	Foussvirus	0	0	0	0	1	1	0	0	0	0	0	0	0	0	0	0	0	0	0	0	0	1	0	0	0	0	1	0	0	0	0	1	0	0	0	0	0	0	0	0	0	0	0	0	0
root|Viruses|Duplodnaviria|Heunggongvirae|Uroviricota|Caudoviricetes|Caudovirales|Autographiviridae|Foussvirus|Foussvirus S46C10	S	2733906	Viruses	Foussvirus S46C10	0	0	0	0	1	1	0	0	0	0	0	0	0	0	0	0	0	0	0	0	0	1	0	0	0	0	1	0	0	0	0	1	0	0	0	0	0	0	0	0	0	0	0	0	0
root|Viruses|Duplodnaviria|Heunggongvirae|Uroviricota|Caudoviricetes|Caudovirales|Autographiviridae|Foussvirus|Foussvirus S46C10|uncultured phage_MedDCM-OCT-S46-C10	S1	2741074	Viruses	uncultured phage_MedDCM-OCT-S46-C10	0	0	0	0	1	1	0	0	0	0	0	0	0	0	0	0	0	0	0	0	0	1	0	0	0	0	1	0	0	0	0	1	0	0	0	0	0	0	0	0	0	0	0	0	0
root|Viruses|Duplodnaviria|Heunggongvirae|Uroviricota|Caudoviricetes|Caudovirales|Autographiviridae|Fussvirus	G	2731940	Viruses	Fussvirus	0	0	0	0	0	0	0	0	0	0	0	0	0	0	0	0	1	3	0	0	0	0	0	0	0	0	0	0	0	0	0	0	0	0	0	0	0	0	0	0	0	0	0	0	0
root|Viruses|Duplodnaviria|Heunggongvirae|Uroviricota|Caudoviricetes|Caudovirales|Autographiviridae|Fussvirus|Fussvirus S30C28	S	2733907	Viruses	Fussvirus S30C28	0	0	0	0	0	0	0	0	0	0	0	0	0	0	0	0	1	3	0	0	0	0	0	0	0	0	0	0	0	0	0	0	0	0	0	0	0	0	0	0	0	0	0	0	0
root|Viruses|Duplodnaviria|Heunggongvirae|Uroviricota|Caudoviricetes|Caudovirales|Autographiviridae|Fussvirus|Fussvirus S30C28|uncultured phage_MedDCM-OCT-S30-C28	S1	2741076	Viruses	uncultured phage_MedDCM-OCT-S30-C28	0	0	0	0	0	0	0	0	0	0	0	0	0	0	0	0	1	3	0	0	0	0	0	0	0	0	0	0	0	0	0	0	0	0	0	0	0	0	0	0	0	0	0	0	0
root|Viruses|Duplodnaviria|Heunggongvirae|Uroviricota|Caudoviricetes|Caudovirales|Autographiviridae|Gajwadongvirus	G	2731941	Viruses	Gajwadongvirus	0	0	1	0	0	0	0	0	0	0	0	0	0	0	0	0	0	0	0	0	0	0	0	0	0	0	0	0	0	0	0	0	0	0	0	0	0	0	0	0	0	0	0	0	0
root|Viruses|Duplodnaviria|Heunggongvirae|Uroviricota|Caudoviricetes|Caudovirales|Autographiviridae|Gajwadongvirus|Pectobacterium virus PP99	S	2733917	Viruses	Pectobacterium virus PP99	0	0	1	0	0	0	0	0	0	0	0	0	0	0	0	0	0	0	0	0	0	0	0	0	0	0	0	0	0	0	0	0	0	0	0	0	0	0	0	0	0	0	0	0	0
root|Viruses|Duplodnaviria|Heunggongvirae|Uroviricota|Caudoviricetes|Caudovirales|Autographiviridae|Gajwadongvirus|Pectobacterium virus PP99|Pectobacterium phage PP99	S1	1932883	Viruses	Pectobacterium phage PP99	0	0	1	0	0	0	0	0	0	0	0	0	0	0	0	0	0	0	0	0	0	0	0	0	0	0	0	0	0	0	0	0	0	0	0	0	0	0	0	0	0	0	0	0	0
root|Viruses|Duplodnaviria|Heunggongvirae|Uroviricota|Caudoviricetes|Caudovirales|Autographiviridae|Gyeongsanvirus	G	2731942	Viruses	Gyeongsanvirus	1	6	1	1	2	1	0	0	0	0	0	2	1	2	0	0	0	1	0	0	0	0	0	0	0	1	0	1	3	1	0	0	0	0	0	0	0	0	0	0	0	0	0	0	0
root|Viruses|Duplodnaviria|Heunggongvirae|Uroviricota|Caudoviricetes|Caudovirales|Autographiviridae|Gyeongsanvirus|Ralstonia virus DURPI	S	2733918	Viruses	Ralstonia virus DURPI	1	5	0	1	1	1	0	0	0	0	0	2	1	1	0	0	0	1	0	0	0	0	0	0	0	1	0	1	3	1	0	0	0	0	0	0	0	0	0	0	0	0	0	0	0
root|Viruses|Duplodnaviria|Heunggongvirae|Uroviricota|Caudoviricetes|Caudovirales|Autographiviridae|Gyeongsanvirus|Ralstonia virus DURPI|Ralstonia phage DU_RP_I	S1	2041493	Viruses	Ralstonia phage DU_RP_I	1	5	0	1	1	1	0	0	0	0	0	2	1	1	0	0	0	1	0	0	0	0	0	0	0	1	0	1	3	1	0	0	0	0	0	0	0	0	0	0	0	0	0	0	0
root|Viruses|Duplodnaviria|Heunggongvirae|Uroviricota|Caudoviricetes|Caudovirales|Autographiviridae|Gyeongsanvirus|Ralstonia virus RsoP1EGY	S	2733919	Viruses	Ralstonia virus RsoP1EGY	0	0	0	0	1	0	0	0	0	0	0	0	0	0	0	0	0	0	0	0	0	0	0	0	0	0	0	0	0	0	0	0	0	0	0	0	0	0	0	0	0	0	0	0	0
root|Viruses|Duplodnaviria|Heunggongvirae|Uroviricota|Caudoviricetes|Caudovirales|Autographiviridae|Gyeongsanvirus|Ralstonia virus RsoP1EGY|Ralstonia phage RsoP1EGY	S1	2070026	Viruses	Ralstonia phage RsoP1EGY	0	0	0	0	1	0	0	0	0	0	0	0	0	0	0	0	0	0	0	0	0	0	0	0	0	0	0	0	0	0	0	0	0	0	0	0	0	0	0	0	0	0	0	0	0
root|Viruses|Duplodnaviria|Heunggongvirae|Uroviricota|Caudoviricetes|Caudovirales|Autographiviridae|Igirivirus	G	2731943	Viruses	Igirivirus	0	0	0	0	0	1	0	0	0	1	1	0	0	1	0	0	0	0	0	0	0	0	0	0	0	0	0	1	0	0	0	0	0	0	0	0	0	0	0	0	0	1	0	0	0
root|Viruses|Duplodnaviria|Heunggongvirae|Uroviricota|Caudoviricetes|Caudovirales|Autographiviridae|Igirivirus|Synechococcus STIP37	S	2733920	Viruses	Synechococcus STIP37	0	0	0	0	0	1	0	0	0	1	1	0	0	1	0	0	0	0	0	0	0	0	0	0	0	0	0	1	0	0	0	0	0	0	0	0	0	0	0	0	0	1	0	0	0
root|Viruses|Duplodnaviria|Heunggongvirae|Uroviricota|Caudoviricetes|Caudovirales|Autographiviridae|Igirivirus|Synechococcus STIP37|Synechococcus T7-like virus S-TIP37	S1	1332145	Viruses	Synechococcus T7-like virus S-TIP37	0	0	0	0	0	1	0	0	0	1	1	0	0	1	0	0	0	0	0	0	0	0	0	0	0	0	0	1	0	0	0	0	0	0	0	0	0	0	0	0	0	1	0	0	0
root|Viruses|Duplodnaviria|Heunggongvirae|Uroviricota|Caudoviricetes|Caudovirales|Autographiviridae|Jiaoyazivirus	G	2731945	Viruses	Jiaoyazivirus	0	0	0	0	0	0	1	0	1	0	0	0	0	1	0	0	0	2	19	0	0	0	0	0	0	0	0	0	1	0	1	0	0	0	0	0	0	0	1	0	0	0	0	0	0
root|Viruses|Duplodnaviria|Heunggongvirae|Uroviricota|Caudoviricetes|Caudovirales|Autographiviridae|Jiaoyazivirus|Ralstonia virus RSB3	S	2733922	Viruses	Ralstonia virus RSB3	0	0	0	0	0	0	1	0	1	0	0	0	0	1	0	0	0	2	19	0	0	0	0	0	0	0	0	0	1	0	1	0	0	0	0	0	0	0	1	0	0	0	0	0	0
root|Viruses|Duplodnaviria|Heunggongvirae|Uroviricota|Caudoviricetes|Caudovirales|Autographiviridae|Jiaoyazivirus|Ralstonia virus RSB3|Ralstonia phage RSB3	S1	1402875	Viruses	Ralstonia phage RSB3	0	0	0	0	0	0	1	0	1	0	0	0	0	1	0	0	0	2	19	0	0	0	0	0	0	0	0	0	1	0	1	0	0	0	0	0	0	0	1	0	0	0	0	0	0
root|Viruses|Duplodnaviria|Heunggongvirae|Uroviricota|Caudoviricetes|Caudovirales|Autographiviridae|Kajamvirus	G	2731947	Viruses	Kajamvirus	0	1	0	0	0	0	0	0	0	1	0	0	1	0	0	0	0	0	0	0	0	0	0	1	0	0	1	0	1	0	0	0	0	0	1	0	0	0	0	0	0	0	0	0	0
root|Viruses|Duplodnaviria|Heunggongvirae|Uroviricota|Caudoviricetes|Caudovirales|Autographiviridae|Kajamvirus|Synechococcus virus SRIP1	S	2733924	Viruses	Synechococcus virus SRIP1	0	1	0	0	0	0	0	0	0	1	0	0	1	0	0	0	0	0	0	0	0	0	0	1	0	0	1	0	1	0	0	0	0	0	1	0	0	0	0	0	0	0	0	0	0
root|Viruses|Duplodnaviria|Heunggongvirae|Uroviricota|Caudoviricetes|Caudovirales|Autographiviridae|Kajamvirus|Synechococcus virus SRIP1|Synechococcus phage S-RIP1	S1	754041	Viruses	Synechococcus phage S-RIP1	0	1	0	0	0	0	0	0	0	1	0	0	1	0	0	0	0	0	0	0	0	0	0	1	0	0	1	0	1	0	0	0	0	0	1	0	0	0	0	0	0	0	0	0	0
root|Viruses|Duplodnaviria|Heunggongvirae|Uroviricota|Caudoviricetes|Caudovirales|Autographiviridae|Kalppathivirus	G	2731949	Viruses	Kalppathivirus	0	0	0	0	2	0	0	0	0	1	0	0	0	0	0	0	0	0	0	0	0	0	0	0	0	0	0	0	0	0	0	0	0	0	0	0	0	0	0	0	0	0	0	0	0
root|Viruses|Duplodnaviria|Heunggongvirae|Uroviricota|Caudoviricetes|Caudovirales|Autographiviridae|Kalppathivirus|Curvibacter virus P26059B	S	2733926	Viruses	Curvibacter virus P26059B	0	0	0	0	2	0	0	0	0	1	0	0	0	0	0	0	0	0	0	0	0	0	0	0	0	0	0	0	0	0	0	0	0	0	0	0	0	0	0	0	0	0	0	0	0
root|Viruses|Duplodnaviria|Heunggongvirae|Uroviricota|Caudoviricetes|Caudovirales|Autographiviridae|Kalppathivirus|Curvibacter virus P26059B|Curvibacter phage P26059B	S1	1983784	Viruses	Curvibacter phage P26059B	0	0	0	0	2	0	0	0	0	1	0	0	0	0	0	0	0	0	0	0	0	0	0	0	0	0	0	0	0	0	0	0	0	0	0	0	0	0	0	0	0	0	0	0	0
root|Viruses|Duplodnaviria|Heunggongvirae|Uroviricota|Caudoviricetes|Caudovirales|Autographiviridae|Kelmasvirus	G	2731950	Viruses	Kelmasvirus	1	0	0	0	0	1	0	1	0	0	0	1	0	0	0	0	0	1	0	0	0	0	0	0	0	0	0	0	0	0	0	0	0	0	1	0	0	0	0	0	0	0	0	0	0
root|Viruses|Duplodnaviria|Heunggongvirae|Uroviricota|Caudoviricetes|Caudovirales|Autographiviridae|Kelmasvirus|Ralstonia virus RSB2	S	2733927	Viruses	Ralstonia virus RSB2	1	0	0	0	0	1	0	1	0	0	0	1	0	0	0	0	0	1	0	0	0	0	0	0	0	0	0	0	0	0	0	0	0	0	1	0	0	0	0	0	0	0	0	0	0
root|Viruses|Duplodnaviria|Heunggongvirae|Uroviricota|Caudoviricetes|Caudovirales|Autographiviridae|Kelmasvirus|Ralstonia virus RSB2|Ralstonia phage RSB2	S1	913183	Viruses	Ralstonia phage RSB2	1	0	0	0	0	1	0	1	0	0	0	1	0	0	0	0	0	1	0	0	0	0	0	0	0	0	0	0	0	0	0	0	0	0	1	0	0	0	0	0	0	0	0	0	0
root|Viruses|Duplodnaviria|Heunggongvirae|Uroviricota|Caudoviricetes|Caudovirales|Autographiviridae|Kembevirus	G	2731951	Viruses	Kembevirus	0	0	0	0	0	0	0	1	0	0	0	0	0	0	0	0	0	1	1	0	0	0	0	0	0	0	0	0	0	0	0	0	0	0	0	0	0	0	1	0	0	0	0	0	0
root|Viruses|Duplodnaviria|Heunggongvirae|Uroviricota|Caudoviricetes|Caudovirales|Autographiviridae|Kembevirus|Synechococcus virus SCBP2	S	2733928	Viruses	Synechococcus virus SCBP2	0	0	0	0	0	0	0	1	0	0	0	0	0	0	0	0	0	1	1	0	0	0	0	0	0	0	0	0	0	0	0	0	0	0	0	0	0	0	1	0	0	0	0	0	0
root|Viruses|Duplodnaviria|Heunggongvirae|Uroviricota|Caudoviricetes|Caudovirales|Autographiviridae|Kembevirus|Synechococcus virus SCBP2|Synechococcus phage S-CBP2	S1	756277	Viruses	Synechococcus phage S-CBP2	0	0	0	0	0	0	0	1	0	0	0	0	0	0	0	0	0	1	1	0	0	0	0	0	0	0	0	0	0	0	0	0	0	0	0	0	0	0	1	0	0	0	0	0	0
root|Viruses|Duplodnaviria|Heunggongvirae|Uroviricota|Caudoviricetes|Caudovirales|Autographiviridae|Krakvirus	G	2731952	Viruses	Krakvirus	0	0	0	0	0	0	1	1	0	0	0	0	0	0	0	1	0	0	2	0	0	0	0	0	0	0	0	0	0	0	0	0	0	0	0	0	0	0	0	0	0	0	1	0	0
root|Viruses|Duplodnaviria|Heunggongvirae|Uroviricota|Caudoviricetes|Caudovirales|Autographiviridae|Krakvirus|Krakvirus S39C11	S	2733929	Viruses	Krakvirus S39C11	0	0	0	0	0	0	1	1	0	0	0	0	0	0	0	1	0	0	2	0	0	0	0	0	0	0	0	0	0	0	0	0	0	0	0	0	0	0	0	0	0	0	1	0	0
root|Viruses|Duplodnaviria|Heunggongvirae|Uroviricota|Caudoviricetes|Caudovirales|Autographiviridae|Krakvirus|Krakvirus S39C11|uncultured phage_MedDCM-OCT-S39-C11	S1	2740805	Viruses	uncultured phage_MedDCM-OCT-S39-C11	0	0	0	0	0	0	1	1	0	0	0	0	0	0	0	1	0	0	2	0	0	0	0	0	0	0	0	0	0	0	0	0	0	0	0	0	0	0	0	0	0	0	1	0	0
root|Viruses|Duplodnaviria|Heunggongvirae|Uroviricota|Caudoviricetes|Caudovirales|Autographiviridae|Krylovirinae	F1	2731648	Viruses	Krylovirinae	2	5	3	3	4	2	1	3	0	0	5	0	0	1	2	2	1	4	2	0	0	4	0	1	0	1	0	2	2	1	0	1	0	0	0	0	0	0	1	0	3	0	0	0	0
root|Viruses|Duplodnaviria|Heunggongvirae|Uroviricota|Caudoviricetes|Caudovirales|Autographiviridae|Krylovirinae|Phikmvvirus	G	477967	Viruses	Phikmvvirus	2	4	2	2	3	2	1	2	0	0	4	0	0	1	2	0	0	4	1	0	0	3	0	1	0	1	0	2	2	1	0	1	0	0	0	0	0	0	0	0	3	0	0	0	0
root|Viruses|Duplodnaviria|Heunggongvirae|Uroviricota|Caudoviricetes|Caudovirales|Autographiviridae|Krylovirinae|Phikmvvirus|Pseudomonas virus 130-113	S	2733348	Viruses	Pseudomonas virus 130-113	0	1	0	0	0	0	0	0	0	0	4	0	0	0	0	0	0	1	0	0	0	2	0	0	0	1	0	2	0	0	0	0	0	0	0	0	0	0	0	0	1	0	0	0	0
root|Viruses|Duplodnaviria|Heunggongvirae|Uroviricota|Caudoviricetes|Caudovirales|Autographiviridae|Krylovirinae|Phikmvvirus|Pseudomonas virus 130-113	S1	2161784	Viruses	Pseudomonas phage vB_PaeP_130_113	0	1	0	0	0	0	0	0	0	0	4	0	0	0	0	0	0	1	0	0	0	2	0	0	0	1	0	2	0	0	0	0	0	0	0	0	0	0	0	0	1	0	0	0	0
root|Viruses|Duplodnaviria|Heunggongvirae|Uroviricota|Caudoviricetes|Caudovirales|Autographiviridae|Krylovirinae|Phikmvvirus|Pseudomonas virus ABTNL	S	2733351	Viruses	Pseudomonas virus ABTNL	0	0	0	0	0	0	0	0	0	0	0	0	0	0	0	0	0	0	0	0	0	0	0	0	0	0	0	0	0	0	0	1	0	0	0	0	0	0	0	0	0	0	0	0	0
root|Viruses|Duplodnaviria|Heunggongvirae|Uroviricota|Caudoviricetes|Caudovirales|Autographiviridae|Krylovirinae|Phikmvvirus|Pseudomonas virus ABTNL	S1	1527525	Viruses	Pseudomonas phage vB_PaeP_PPA-ABTNL	0	0	0	0	0	0	0	0	0	0	0	0	0	0	0	0	0	0	0	0	0	0	0	0	0	0	0	0	0	0	0	1	0	0	0	0	0	0	0	0	0	0	0	0	0
root|Viruses|Duplodnaviria|Heunggongvirae|Uroviricota|Caudoviricetes|Caudovirales|Autographiviridae|Krylovirinae|Phikmvvirus|Pseudomonas virus LKD16	S	2733354	Viruses	Pseudomonas virus LKD16	1	0	1	1	2	0	0	0	0	0	0	0	0	0	0	0	0	0	0	0	0	0	0	0	0	0	0	0	1	0	0	0	0	0	0	0	0	0	0	0	0	0	0	0	0
root|Viruses|Duplodnaviria|Heunggongvirae|Uroviricota|Caudoviricetes|Caudovirales|Autographiviridae|Krylovirinae|Phikmvvirus|Pseudomonas virus LKD16	S1	386792	Viruses	Pseudomonas phage LKD16	1	0	1	1	2	0	0	0	0	0	0	0	0	0	0	0	0	0	0	0	0	0	0	0	0	0	0	0	1	0	0	0	0	0	0	0	0	0	0	0	0	0	0	0	0
root|Viruses|Duplodnaviria|Heunggongvirae|Uroviricota|Caudoviricetes|Caudovirales|Autographiviridae|Krylovirinae|Phikmvvirus|Pseudomonas virus LUZ19	S	2733355	Viruses	Pseudomonas virus LUZ19	0	0	0	0	0	0	0	0	0	0	0	0	0	0	2	0	0	0	0	0	0	0	0	0	0	0	0	0	0	0	0	0	0	0	0	0	0	0	0	0	0	0	0	0	0
root|Viruses|Duplodnaviria|Heunggongvirae|Uroviricota|Caudoviricetes|Caudovirales|Autographiviridae|Krylovirinae|Phikmvvirus|Pseudomonas virus LUZ19	S1	484896	Viruses	Pseudomonas phage LUZ19	0	0	0	0	0	0	0	0	0	0	0	0	0	0	2	0	0	0	0	0	0	0	0	0	0	0	0	0	0	0	0	0	0	0	0	0	0	0	0	0	0	0	0	0	0
root|Viruses|Duplodnaviria|Heunggongvirae|Uroviricota|Caudoviricetes|Caudovirales|Autographiviridae|Krylovirinae|Phikmvvirus|Pseudomonas virus PT5	S	2733361	Viruses	Pseudomonas virus PT5	0	0	0	0	0	0	0	0	0	0	0	0	0	0	0	0	0	0	0	0	0	1	0	0	0	0	0	0	0	0	0	0	0	0	0	0	0	0	0	0	0	0	0	0	0
root|Viruses|Duplodnaviria|Heunggongvirae|Uroviricota|Caudoviricetes|Caudovirales|Autographiviridae|Krylovirinae|Phikmvvirus|Pseudomonas virus PT5	S1	476523	Viruses	Pseudomonas phage PT5	0	0	0	0	0	0	0	0	0	0	0	0	0	0	0	0	0	0	0	0	0	1	0	0	0	0	0	0	0	0	0	0	0	0	0	0	0	0	0	0	0	0	0	0	0
root|Viruses|Duplodnaviria|Heunggongvirae|Uroviricota|Caudoviricetes|Caudovirales|Autographiviridae|Krylovirinae|Phikmvvirus|Pseudomonas virus kF77	S	2733353	Viruses	Pseudomonas virus kF77	0	1	0	0	0	0	0	0	0	0	0	0	0	1	0	0	0	0	0	0	0	0	0	0	0	0	0	0	0	0	0	0	0	0	0	0	0	0	0	0	0	0	0	0	0
root|Viruses|Duplodnaviria|Heunggongvirae|Uroviricota|Caudoviricetes|Caudovirales|Autographiviridae|Krylovirinae|Phikmvvirus|Pseudomonas virus kF77	S1	627480	Viruses	Pseudomonas phage phikF77	0	1	0	0	0	0	0	0	0	0	0	0	0	1	0	0	0	0	0	0	0	0	0	0	0	0	0	0	0	0	0	0	0	0	0	0	0	0	0	0	0	0	0	0	0
root|Viruses|Duplodnaviria|Heunggongvirae|Uroviricota|Caudoviricetes|Caudovirales|Autographiviridae|Krylovirinae|Stubburvirus	G	2732924	Viruses	Stubburvirus	0	0	1	1	0	0	0	1	0	0	0	0	0	0	0	2	1	0	1	0	0	0	0	0	0	0	0	0	0	0	0	0	0	0	0	0	0	0	1	0	0	0	0	0	0
root|Viruses|Duplodnaviria|Heunggongvirae|Uroviricota|Caudoviricetes|Caudovirales|Autographiviridae|Krylovirinae|Stubburvirus|Pseudomonas virus LKA1	S	1985731	Viruses	Pseudomonas virus LKA1	0	0	1	1	0	0	0	1	0	0	0	0	0	0	0	2	1	0	1	0	0	0	0	0	0	0	0	0	0	0	0	0	0	0	0	0	0	0	1	0	0	0	0	0	0
root|Viruses|Duplodnaviria|Heunggongvirae|Uroviricota|Caudoviricetes|Caudovirales|Autographiviridae|Krylovirinae|Stubburvirus|Pseudomonas virus LKA1	S1	386793	Viruses	Pseudomonas phage LKA1	0	0	1	1	0	0	0	1	0	0	0	0	0	0	0	2	1	0	1	0	0	0	0	0	0	0	0	0	0	0	0	0	0	0	0	0	0	0	1	0	0	0	0	0	0
root|Viruses|Duplodnaviria|Heunggongvirae|Uroviricota|Caudoviricetes|Caudovirales|Autographiviridae|Krylovirinae|Tunggulviirus	G	2732909	Viruses	Tunggulviirus	0	1	0	0	1	0	0	0	0	0	1	0	0	0	0	0	0	0	0	0	0	1	0	0	0	0	0	0	0	0	0	0	0	0	0	0	0	0	0	0	0	0	0	0	0
root|Viruses|Duplodnaviria|Heunggongvirae|Uroviricota|Caudoviricetes|Caudovirales|Autographiviridae|Krylovirinae|Tunggulviirus|Pseudomonas virus f2	S	2733363	Viruses	Pseudomonas virus f2	0	1	0	0	1	0	0	0	0	0	1	0	0	0	0	0	0	0	0	0	0	1	0	0	0	0	0	0	0	0	0	0	0	0	0	0	0	0	0	0	0	0	0	0	0
root|Viruses|Duplodnaviria|Heunggongvirae|Uroviricota|Caudoviricetes|Caudovirales|Autographiviridae|Krylovirinae|Tunggulviirus|Pseudomonas virus f2	S1	693582	Viruses	Pseudomonas phage phi-2	0	1	0	0	1	0	0	0	0	0	1	0	0	0	0	0	0	0	0	0	0	1	0	0	0	0	0	0	0	0	0	0	0	0	0	0	0	0	0	0	0	0	0	0	0
root|Viruses|Duplodnaviria|Heunggongvirae|Uroviricota|Caudoviricetes|Caudovirales|Autographiviridae|Lauvirus	G	2731953	Viruses	Lauvirus	0	1	0	2	1	1	3	1	0	0	0	0	1	0	0	0	0	0	1	0	0	1	0	0	0	0	0	0	0	0	0	2	0	0	0	0	0	0	0	1	0	0	0	0	0
root|Viruses|Duplodnaviria|Heunggongvirae|Uroviricota|Caudoviricetes|Caudovirales|Autographiviridae|Lauvirus|Podovirus Lau218	S	1465639	Viruses	Podovirus Lau218	0	1	0	2	1	1	3	1	0	0	0	0	1	0	0	0	0	0	1	0	0	1	0	0	0	0	0	0	0	0	0	2	0	0	0	0	0	0	0	1	0	0	0	0	0
root|Viruses|Duplodnaviria|Heunggongvirae|Uroviricota|Caudoviricetes|Caudovirales|Autographiviridae|Limelightvirus	G	2731954	Viruses	Limelightvirus	0	0	0	1	0	1	0	2	0	0	0	0	0	0	0	0	0	1	0	0	0	0	0	0	0	0	0	0	0	0	0	0	0	0	1	0	0	0	0	0	0	0	0	0	0
root|Viruses|Duplodnaviria|Heunggongvirae|Uroviricota|Caudoviricetes|Caudovirales|Autographiviridae|Limelightvirus|Pantoea virus Limelight	S	1985729	Viruses	Pantoea virus Limelight	0	0	0	1	0	1	0	2	0	0	0	0	0	0	0	0	0	1	0	0	0	0	0	0	0	0	0	0	0	0	0	0	0	0	1	0	0	0	0	0	0	0	0	0	0
root|Viruses|Duplodnaviria|Heunggongvirae|Uroviricota|Caudoviricetes|Caudovirales|Autographiviridae|Limelightvirus|Pantoea virus Limelight|Pantoea phage LIMElight	S1	881915	Viruses	Pantoea phage LIMElight	0	0	0	1	0	1	0	2	0	0	0	0	0	0	0	0	0	1	0	0	0	0	0	0	0	0	0	0	0	0	0	0	0	0	1	0	0	0	0	0	0	0	0	0	0
root|Viruses|Duplodnaviria|Heunggongvirae|Uroviricota|Caudoviricetes|Caudovirales|Autographiviridae|Lingvirus	G	2731955	Viruses	Lingvirus	0	1	0	1	0	0	0	0	0	0	0	0	0	3	0	0	0	0	1	0	0	0	0	0	0	0	0	0	0	0	0	0	0	0	0	0	0	0	0	0	0	2	0	0	0
root|Viruses|Duplodnaviria|Heunggongvirae|Uroviricota|Caudoviricetes|Caudovirales|Autographiviridae|Lingvirus|Prochlorococcus virus PGSP1	S	2733930	Viruses	Prochlorococcus virus PGSP1	0	1	0	1	0	0	0	0	0	0	0	0	0	3	0	0	0	0	1	0	0	0	0	0	0	0	0	0	0	0	0	0	0	0	0	0	0	0	0	0	0	2	0	0	0
root|Viruses|Duplodnaviria|Heunggongvirae|Uroviricota|Caudoviricetes|Caudovirales|Autographiviridae|Lingvirus|Prochlorococcus virus PGSP1|Prochlorococcus phage P-GSP1	S1	382262	Viruses	Prochlorococcus phage P-GSP1	0	1	0	1	0	0	0	0	0	0	0	0	0	3	0	0	0	0	1	0	0	0	0	0	0	0	0	0	0	0	0	0	0	0	0	0	0	0	0	0	0	2	0	0	0
root|Viruses|Duplodnaviria|Heunggongvirae|Uroviricota|Caudoviricetes|Caudovirales|Autographiviridae|Lullwatervirus	G	2731957	Viruses	Lullwatervirus	0	2	4	0	1	2	0	1	0	1	0	2	1	0	0	0	0	0	0	0	0	1	0	0	0	1	0	0	0	2	0	0	0	0	1	1	0	0	0	0	1	0	0	0	0
root|Viruses|Duplodnaviria|Heunggongvirae|Uroviricota|Caudoviricetes|Caudovirales|Autographiviridae|Lullwatervirus|Caulobacter virus Lullwater	S	2733932	Viruses	Caulobacter virus Lullwater	0	2	4	0	1	2	0	1	0	1	0	2	1	0	0	0	0	0	0	0	0	1	0	0	0	1	0	0	0	2	0	0	0	0	1	1	0	0	0	0	1	0	0	0	0
root|Viruses|Duplodnaviria|Heunggongvirae|Uroviricota|Caudoviricetes|Caudovirales|Autographiviridae|Lullwatervirus|Caulobacter virus Lullwater|Caulobacter phage Lullwater	S1	2024607	Viruses	Caulobacter phage Lullwater	0	2	4	0	1	2	0	1	0	1	0	2	1	0	0	0	0	0	0	0	0	1	0	0	0	1	0	0	0	2	0	0	0	0	1	1	0	0	0	0	1	0	0	0	0
root|Viruses|Duplodnaviria|Heunggongvirae|Uroviricota|Caudoviricetes|Caudovirales|Autographiviridae|Maculvirus	G	2731958	Viruses	Maculvirus	0	1	0	1	1	2	0	0	0	0	1	0	0	1	0	0	0	1	0	0	0	1	0	0	0	1	1	0	0	1	0	0	0	0	0	0	0	0	0	0	0	0	0	0	0
root|Viruses|Duplodnaviria|Heunggongvirae|Uroviricota|Caudoviricetes|Caudovirales|Autographiviridae|Maculvirus|Vibrio virus KF2	S	2733934	Viruses	Vibrio virus KF2	0	1	0	1	1	1	0	0	0	0	1	0	0	0	0	0	0	1	0	0	0	1	0	0	0	1	1	0	0	1	0	0	0	0	0	0	0	0	0	0	0	0	0	0	0
root|Viruses|Duplodnaviria|Heunggongvirae|Uroviricota|Caudoviricetes|Caudovirales|Autographiviridae|Maculvirus|Vibrio virus KF2|Vibrio phage vB_VpaP_KF2	S1	2041473	Viruses	Vibrio phage vB_VpaP_KF2	0	1	0	1	1	1	0	0	0	0	1	0	0	0	0	0	0	1	0	0	0	1	0	0	0	1	1	0	0	1	0	0	0	0	0	0	0	0	0	0	0	0	0	0	0
root|Viruses|Duplodnaviria|Heunggongvirae|Uroviricota|Caudoviricetes|Caudovirales|Autographiviridae|Maculvirus|Vibrio virus OWB	S	2733935	Viruses	Vibrio virus OWB	0	0	0	0	0	0	0	0	0	0	0	0	0	1	0	0	0	0	0	0	0	0	0	0	0	0	0	0	0	0	0	0	0	0	0	0	0	0	0	0	0	0	0	0	0
root|Viruses|Duplodnaviria|Heunggongvirae|Uroviricota|Caudoviricetes|Caudovirales|Autographiviridae|Maculvirus|Vibrio virus OWB|Vibrio phage vB_VpaS_OWB	S1	2419783	Viruses	Vibrio phage vB_VpaS_OWB	0	0	0	0	0	0	0	0	0	0	0	0	0	1	0	0	0	0	0	0	0	0	0	0	0	0	0	0	0	0	0	0	0	0	0	0	0	0	0	0	0	0	0	0	0
root|Viruses|Duplodnaviria|Heunggongvirae|Uroviricota|Caudoviricetes|Caudovirales|Autographiviridae|Melnykvirinae	F1	2731649	Viruses	Melnykvirinae	5	4	4	5	5	2	5	3	3	2	1	3	3	2	0	4	3	3	2	0	0	0	1	0	0	0	1	1	1	2	1	0	0	0	0	0	10	0	0	0	0	3	0	1	0
root|Viruses|Duplodnaviria|Heunggongvirae|Uroviricota|Caudoviricetes|Caudovirales|Autographiviridae|Melnykvirinae|Aerosvirus	G	2732910	Viruses	Aerosvirus	1	0	0	2	1	0	3	0	2	0	0	0	0	0	0	2	0	1	0	0	0	0	0	0	0	0	0	1	0	0	0	0	0	0	0	0	0	0	0	0	0	0	0	0	0
root|Viruses|Duplodnaviria|Heunggongvirae|Uroviricota|Caudoviricetes|Caudovirales|Autographiviridae|Melnykvirinae|Aerosvirus|Aeromonas virus 25AhydR2PP	S	2733364	Viruses	Aeromonas virus 25AhydR2PP	1	0	0	0	1	0	0	0	1	0	0	0	0	0	0	0	0	0	0	0	0	0	0	0	0	0	0	0	0	0	0	0	0	0	0	0	0	0	0	0	0	0	0	0	0
root|Viruses|Duplodnaviria|Heunggongvirae|Uroviricota|Caudoviricetes|Caudovirales|Autographiviridae|Melnykvirinae|Aerosvirus|Aeromonas virus 25AhydR2PP	S1	2163976	Viruses	Aeromonas phage 25AhydR2PP	1	0	0	0	1	0	0	0	1	0	0	0	0	0	0	0	0	0	0	0	0	0	0	0	0	0	0	0	0	0	0	0	0	0	0	0	0	0	0	0	0	0	0	0	0
root|Viruses|Duplodnaviria|Heunggongvirae|Uroviricota|Caudoviricetes|Caudovirales|Autographiviridae|Melnykvirinae|Aerosvirus|Aeromonas virus AS7	S	2733365	Viruses	Aeromonas virus AS7	0	0	0	1	0	0	0	0	0	0	0	0	0	0	0	0	0	0	0	0	0	0	0	0	0	0	0	1	0	0	0	0	0	0	0	0	0	0	0	0	0	0	0	0	0
root|Viruses|Duplodnaviria|Heunggongvirae|Uroviricota|Caudoviricetes|Caudovirales|Autographiviridae|Melnykvirinae|Aerosvirus|Aeromonas virus AS7	S1	1141132	Viruses	Aeromonas phage phiAS7	0	0	0	1	0	0	0	0	0	0	0	0	0	0	0	0	0	0	0	0	0	0	0	0	0	0	0	1	0	0	0	0	0	0	0	0	0	0	0	0	0	0	0	0	0
root|Viruses|Duplodnaviria|Heunggongvirae|Uroviricota|Caudoviricetes|Caudovirales|Autographiviridae|Melnykvirinae|Aerosvirus|Aeromonas virus ZPAH7	S	2733366	Viruses	Aeromonas virus ZPAH7	0	0	0	1	0	0	3	0	1	0	0	0	0	0	0	1	0	0	0	0	0	0	0	0	0	0	0	0	0	0	0	0	0	0	0	0	0	0	0	0	0	0	0	0	0
root|Viruses|Duplodnaviria|Heunggongvirae|Uroviricota|Caudoviricetes|Caudovirales|Autographiviridae|Melnykvirinae|Aerosvirus|Aeromonas virus ZPAH7	S1	2420320	Viruses	Aeromonas phage ZPAH7	0	0	0	1	0	0	3	0	1	0	0	0	0	0	0	1	0	0	0	0	0	0	0	0	0	0	0	0	0	0	0	0	0	0	0	0	0	0	0	0	0	0	0	0	0
root|Viruses|Duplodnaviria|Heunggongvirae|Uroviricota|Caudoviricetes|Caudovirales|Autographiviridae|Melnykvirinae|Aghbyvirus	G	2732911	Viruses	Aghbyvirus	0	0	0	0	0	0	1	0	0	0	0	0	0	0	0	1	0	0	0	0	0	0	0	0	0	0	0	0	0	0	0	0	0	0	0	0	0	0	0	0	0	1	0	0	0
root|Viruses|Duplodnaviria|Heunggongvirae|Uroviricota|Caudoviricetes|Caudovirales|Autographiviridae|Melnykvirinae|Aghbyvirus|Yersinia virus ISAO8	S	2733367	Viruses	Yersinia virus ISAO8	0	0	0	0	0	0	1	0	0	0	0	0	0	0	0	1	0	0	0	0	0	0	0	0	0	0	0	0	0	0	0	0	0	0	0	0	0	0	0	0	0	1	0	0	0
root|Viruses|Duplodnaviria|Heunggongvirae|Uroviricota|Caudoviricetes|Caudovirales|Autographiviridae|Melnykvirinae|Aghbyvirus|Yersinia virus ISAO8	S1	1675027	Viruses	Yersinia phage vB_YenP_ISAO8	0	0	0	0	0	0	1	0	0	0	0	0	0	0	0	1	0	0	0	0	0	0	0	0	0	0	0	0	0	0	0	0	0	0	0	0	0	0	0	0	0	1	0	0	0
root|Viruses|Duplodnaviria|Heunggongvirae|Uroviricota|Caudoviricetes|Caudovirales|Autographiviridae|Melnykvirinae|Ahphunavirus	G	2732912	Viruses	Ahphunavirus	2	1	2	1	4	2	0	2	0	0	0	2	2	0	0	1	2	1	2	0	0	0	1	0	0	0	1	0	1	1	0	0	0	0	0	0	1	0	0	0	0	0	0	0	0
root|Viruses|Duplodnaviria|Heunggongvirae|Uroviricota|Caudoviricetes|Caudovirales|Autographiviridae|Melnykvirinae|Ahphunavirus|Aeromonas virus Ahp1	S	2733368	Viruses	Aeromonas virus Ahp1	1	1	0	0	1	0	0	2	0	0	0	1	1	0	0	0	0	1	2	0	0	0	0	0	0	0	0	0	1	0	0	0	0	0	0	0	0	0	0	0	0	0	0	0	0
root|Viruses|Duplodnaviria|Heunggongvirae|Uroviricota|Caudoviricetes|Caudovirales|Autographiviridae|Melnykvirinae|Ahphunavirus|Aeromonas virus Ahp1	S1	1747286	Viruses	Aeromonas phage Ahp1	1	1	0	0	1	0	0	2	0	0	0	1	1	0	0	0	0	1	2	0	0	0	0	0	0	0	0	0	1	0	0	0	0	0	0	0	0	0	0	0	0	0	0	0	0
root|Viruses|Duplodnaviria|Heunggongvirae|Uroviricota|Caudoviricetes|Caudovirales|Autographiviridae|Melnykvirinae|Ahphunavirus|Aeromonas virus CF7	S	2733369	Viruses	Aeromonas virus CF7	1	0	2	0	2	0	0	0	0	0	0	0	1	0	0	1	1	0	0	0	0	0	0	0	0	0	1	0	0	0	0	0	0	0	0	0	1	0	0	0	0	0	0	0	0
root|Viruses|Duplodnaviria|Heunggongvirae|Uroviricota|Caudoviricetes|Caudovirales|Autographiviridae|Melnykvirinae|Ahphunavirus|Aeromonas virus CF7	S1	2507411	Viruses	Aeromonas phage CF7	1	0	2	0	2	0	0	0	0	0	0	0	1	0	0	1	1	0	0	0	0	0	0	0	0	0	1	0	0	0	0	0	0	0	0	0	1	0	0	0	0	0	0	0	0
root|Viruses|Duplodnaviria|Heunggongvirae|Uroviricota|Caudoviricetes|Caudovirales|Autographiviridae|Melnykvirinae|Cronosvirus	G	2732913	Viruses	Cronosvirus	0	2	2	0	0	0	1	0	0	1	1	0	1	1	0	0	0	1	0	0	0	0	0	0	0	0	0	0	0	1	0	0	0	0	0	0	9	0	0	0	0	2	0	0	0
root|Viruses|Duplodnaviria|Heunggongvirae|Uroviricota|Caudoviricetes|Caudovirales|Autographiviridae|Melnykvirinae|Cronosvirus|Cronobacter virus DevCD23823	S	2733370	Viruses	Cronobacter virus DevCD23823	0	2	2	0	0	0	0	0	0	1	1	0	1	1	0	0	0	1	0	0	0	0	0	0	0	0	0	0	0	0	0	0	0	0	0	0	0	0	0	0	0	1	0	0	0
root|Viruses|Duplodnaviria|Heunggongvirae|Uroviricota|Caudoviricetes|Caudovirales|Autographiviridae|Melnykvirinae|Cronosvirus|Cronobacter virus DevCD23823	S1	1712539	Viruses	Cronobacter phage Dev-CD-23823	0	2	2	0	0	0	0	0	0	1	1	0	1	1	0	0	0	1	0	0	0	0	0	0	0	0	0	0	0	0	0	0	0	0	0	0	0	0	0	0	0	1	0	0	0
root|Viruses|Duplodnaviria|Heunggongvirae|Uroviricota|Caudoviricetes|Caudovirales|Autographiviridae|Melnykvirinae|Cronosvirus|Cronobacter virus GAP227	S	2733371	Viruses	Cronobacter virus GAP227	0	0	0	0	0	0	0	0	0	0	0	0	0	0	0	0	0	0	0	0	0	0	0	0	0	0	0	0	0	1	0	0	0	0	0	0	9	0	0	0	0	1	0	0	0
root|Viruses|Duplodnaviria|Heunggongvirae|Uroviricota|Caudoviricetes|Caudovirales|Autographiviridae|Melnykvirinae|Cronosvirus|Cronobacter virus GAP227	S1	1264737	Viruses	Cronobacter phage vB_CskP_GAP227	0	0	0	0	0	0	0	0	0	0	0	0	0	0	0	0	0	0	0	0	0	0	0	0	0	0	0	0	0	1	0	0	0	0	0	0	9	0	0	0	0	1	0	0	0
root|Viruses|Duplodnaviria|Heunggongvirae|Uroviricota|Caudoviricetes|Caudovirales|Autographiviridae|Melnykvirinae|Panjvirus	G	2732914	Viruses	Panjvirus	0	1	0	0	0	0	0	0	0	0	0	0	0	0	0	0	0	0	0	0	0	0	0	0	0	0	0	0	0	0	0	0	0	0	0	0	0	0	0	0	0	0	0	0	0
root|Viruses|Duplodnaviria|Heunggongvirae|Uroviricota|Caudoviricetes|Caudovirales|Autographiviridae|Melnykvirinae|Panjvirus|Salmonella virus Spp16	S	2733372	Viruses	Salmonella virus Spp16	0	1	0	0	0	0	0	0	0	0	0	0	0	0	0	0	0	0	0	0	0	0	0	0	0	0	0	0	0	0	0	0	0	0	0	0	0	0	0	0	0	0	0	0	0
root|Viruses|Duplodnaviria|Heunggongvirae|Uroviricota|Caudoviricetes|Caudovirales|Autographiviridae|Melnykvirinae|Panjvirus|Salmonella virus Spp16	S1	2081603	Viruses	Salmonella phage vB_SpuP_Spp16	0	1	0	0	0	0	0	0	0	0	0	0	0	0	0	0	0	0	0	0	0	0	0	0	0	0	0	0	0	0	0	0	0	0	0	0	0	0	0	0	0	0	0	0	0
root|Viruses|Duplodnaviria|Heunggongvirae|Uroviricota|Caudoviricetes|Caudovirales|Autographiviridae|Melnykvirinae|Pienvirus	G	2732915	Viruses	Pienvirus	0	0	0	0	0	0	0	0	1	0	0	1	0	0	0	0	0	0	0	0	0	0	0	0	0	0	0	0	0	0	0	0	0	0	0	0	0	0	0	0	0	0	0	1	0
root|Viruses|Duplodnaviria|Heunggongvirae|Uroviricota|Caudoviricetes|Caudovirales|Autographiviridae|Melnykvirinae|Pienvirus|Yersinia virus R8-01	S	2733373	Viruses	Yersinia virus R8-01	0	0	0	0	0	0	0	0	1	0	0	1	0	0	0	0	0	0	0	0	0	0	0	0	0	0	0	0	0	0	0	0	0	0	0	0	0	0	0	0	0	0	0	1	0
root|Viruses|Duplodnaviria|Heunggongvirae|Uroviricota|Caudoviricetes|Caudovirales|Autographiviridae|Melnykvirinae|Pienvirus|Yersinia virus R8-01	S1	1206556	Viruses	Yersinia phage phiR8-01	0	0	0	0	0	0	0	0	1	0	0	1	0	0	0	0	0	0	0	0	0	0	0	0	0	0	0	0	0	0	0	0	0	0	0	0	0	0	0	0	0	0	0	1	0
root|Viruses|Duplodnaviria|Heunggongvirae|Uroviricota|Caudoviricetes|Caudovirales|Autographiviridae|Melnykvirinae|Pokrovskaiavirus	G	2732916	Viruses	Pokrovskaiavirus	2	0	0	2	0	0	0	1	0	1	0	0	0	1	0	0	0	0	0	0	0	0	0	0	0	0	0	0	0	0	1	0	0	0	0	0	0	0	0	0	0	0	0	0	0
root|Viruses|Duplodnaviria|Heunggongvirae|Uroviricota|Caudoviricetes|Caudovirales|Autographiviridae|Melnykvirinae|Wanjuvirus	G	2732917	Viruses	Wanjuvirus	0	0	0	0	0	0	0	0	0	0	0	0	0	0	0	0	1	0	0	0	0	0	0	0	0	0	0	0	0	0	0	0	0	0	0	0	0	0	0	0	0	0	0	0	0
root|Viruses|Duplodnaviria|Heunggongvirae|Uroviricota|Caudoviricetes|Caudovirales|Autographiviridae|Melnykvirinae|Wanjuvirus|Pectobacterium virus PP2	S	2733377	Viruses	Pectobacterium virus PP2	0	0	0	0	0	0	0	0	0	0	0	0	0	0	0	0	1	0	0	0	0	0	0	0	0	0	0	0	0	0	0	0	0	0	0	0	0	0	0	0	0	0	0	0	0
root|Viruses|Duplodnaviria|Heunggongvirae|Uroviricota|Caudoviricetes|Caudovirales|Autographiviridae|Melnykvirinae|Wanjuvirus|Pectobacterium virus PP2	S1	1897743	Viruses	Pectobacterium phage PP2	0	0	0	0	0	0	0	0	0	0	0	0	0	0	0	0	1	0	0	0	0	0	0	0	0	0	0	0	0	0	0	0	0	0	0	0	0	0	0	0	0	0	0	0	0
root|Viruses|Duplodnaviria|Heunggongvirae|Uroviricota|Caudoviricetes|Caudovirales|Autographiviridae|Molineuxvirinae	F1	2731650	Viruses	Molineuxvirinae	1	0	1	2	4	3	3	0	1	4	2	2	4	2	0	3	1	4	3	0	0	0	1	0	0	1	2	4	5	2	0	1	0	1	0	1	5	0	0	1	0	4	2	0	0
root|Viruses|Duplodnaviria|Heunggongvirae|Uroviricota|Caudoviricetes|Caudovirales|Autographiviridae|Molineuxvirinae|Acadevirus	G	2732918	Viruses	Acadevirus	0	0	0	0	1	1	0	0	0	0	0	0	0	0	0	1	0	0	1	0	0	0	0	0	0	0	0	2	1	0	0	0	0	0	0	0	1	0	0	1	0	0	0	0	0
root|Viruses|Duplodnaviria|Heunggongvirae|Uroviricota|Caudoviricetes|Caudovirales|Autographiviridae|Molineuxvirinae|Acadevirus|Proteus virus PM116	S	2733576	Viruses	Proteus virus PM116	0	0	0	0	0	1	0	0	0	0	0	0	0	0	0	1	0	0	0	0	0	0	0	0	0	0	0	0	0	0	0	0	0	0	0	0	0	0	0	0	0	0	0	0	0
root|Viruses|Duplodnaviria|Heunggongvirae|Uroviricota|Caudoviricetes|Caudovirales|Autographiviridae|Molineuxvirinae|Acadevirus|Proteus virus PM116	S1	1837877	Viruses	Proteus phage PM 116	0	0	0	0	0	1	0	0	0	0	0	0	0	0	0	1	0	0	0	0	0	0	0	0	0	0	0	0	0	0	0	0	0	0	0	0	0	0	0	0	0	0	0	0	0
root|Viruses|Duplodnaviria|Heunggongvirae|Uroviricota|Caudoviricetes|Caudovirales|Autographiviridae|Molineuxvirinae|Acadevirus|Proteus virus PM85	S	2733574	Viruses	Proteus virus PM85	0	0	0	0	0	0	0	0	0	0	0	0	0	0	0	0	0	0	0	0	0	0	0	0	0	0	0	0	1	0	0	0	0	0	0	0	0	0	0	0	0	0	0	0	0
root|Viruses|Duplodnaviria|Heunggongvirae|Uroviricota|Caudoviricetes|Caudovirales|Autographiviridae|Molineuxvirinae|Acadevirus|Proteus virus PM85	S1	1560283	Viruses	Proteus phage PM 85	0	0	0	0	0	0	0	0	0	0	0	0	0	0	0	0	0	0	0	0	0	0	0	0	0	0	0	0	1	0	0	0	0	0	0	0	0	0	0	0	0	0	0	0	0
root|Viruses|Duplodnaviria|Heunggongvirae|Uroviricota|Caudoviricetes|Caudovirales|Autographiviridae|Molineuxvirinae|Acadevirus|Proteus virus PM93	S	2733575	Viruses	Proteus virus PM93	0	0	0	0	0	0	0	0	0	0	0	0	0	0	0	0	0	0	0	0	0	0	0	0	0	0	0	2	0	0	0	0	0	0	0	0	0	0	0	0	0	0	0	0	0
root|Viruses|Duplodnaviria|Heunggongvirae|Uroviricota|Caudoviricetes|Caudovirales|Autographiviridae|Molineuxvirinae|Acadevirus|Proteus virus PM93	S1	1560284	Viruses	Proteus phage PM 93	0	0	0	0	0	0	0	0	0	0	0	0	0	0	0	0	0	0	0	0	0	0	0	0	0	0	0	2	0	0	0	0	0	0	0	0	0	0	0	0	0	0	0	0	0
root|Viruses|Duplodnaviria|Heunggongvirae|Uroviricota|Caudoviricetes|Caudovirales|Autographiviridae|Molineuxvirinae|Acadevirus|Proteus virus Pm5460	S	2733577	Viruses	Proteus virus Pm5460	0	0	0	0	0	0	0	0	0	0	0	0	0	0	0	0	0	0	1	0	0	0	0	0	0	0	0	0	0	0	0	0	0	0	0	0	0	0	0	1	0	0	0	0	0
root|Viruses|Duplodnaviria|Heunggongvirae|Uroviricota|Caudoviricetes|Caudovirales|Autographiviridae|Molineuxvirinae|Acadevirus|Proteus virus Pm5460	S1	1636249	Viruses	Proteus phage vB_PmiP_Pm5460	0	0	0	0	0	0	0	0	0	0	0	0	0	0	0	0	0	0	1	0	0	0	0	0	0	0	0	0	0	0	0	0	0	0	0	0	0	0	0	1	0	0	0	0	0
root|Viruses|Duplodnaviria|Heunggongvirae|Uroviricota|Caudoviricetes|Caudovirales|Autographiviridae|Molineuxvirinae|Axomammavirus	G	2732925	Viruses	Axomammavirus	0	0	0	0	0	0	0	0	0	0	0	0	0	0	0	0	0	0	0	0	0	0	0	0	0	0	0	0	0	0	0	0	0	0	0	0	0	0	0	0	0	0	0	0	0
root|Viruses|Duplodnaviria|Heunggongvirae|Uroviricota|Caudoviricetes|Caudovirales|Autographiviridae|Molineuxvirinae|Axomammavirus|Pectobacterium virus PP1	S	2733578	Viruses	Pectobacterium virus PP1	0	0	0	0	0	0	0	0	0	0	0	0	0	0	0	0	0	0	0	0	0	0	0	0	0	0	0	0	0	0	0	0	0	0	0	0	0	0	0	0	0	0	0	0	0
root|Viruses|Duplodnaviria|Heunggongvirae|Uroviricota|Caudoviricetes|Caudovirales|Autographiviridae|Molineuxvirinae|Axomammavirus|Pectobacterium virus PP1	S1	1217810	Viruses	Pectobacterium phage PP1	0	0	0	0	0	0	0	0	0	0	0	0	0	0	0	0	0	0	0	0	0	0	0	0	0	0	0	0	0	0	0	0	0	0	0	0	0	0	0	0	0	0	0	0	0
root|Viruses|Duplodnaviria|Heunggongvirae|Uroviricota|Caudoviricetes|Caudovirales|Autographiviridae|Molineuxvirinae|Eracentumvirus	G	2732926	Viruses	Eracentumvirus	1	0	0	0	0	2	1	0	0	0	0	0	2	1	0	1	0	0	1	0	0	0	1	0	0	0	0	1	2	1	0	0	0	0	0	1	1	0	0	0	0	2	0	0	0
root|Viruses|Duplodnaviria|Heunggongvirae|Uroviricota|Caudoviricetes|Caudovirales|Autographiviridae|Molineuxvirinae|Eracentumvirus|Erwinia virus Era103	S	1985737	Viruses	Erwinia virus Era103	0	0	0	0	0	0	0	0	0	0	0	0	0	0	0	0	0	0	0	0	0	0	1	0	0	0	0	0	0	0	0	0	0	0	0	0	1	0	0	0	0	0	0	0	0
root|Viruses|Duplodnaviria|Heunggongvirae|Uroviricota|Caudoviricetes|Caudovirales|Autographiviridae|Molineuxvirinae|Eracentumvirus|Erwinia virus Era103	S1	418443	Viruses	Erwinia amylovora phage Era103	0	0	0	0	0	0	0	0	0	0	0	0	0	0	0	0	0	0	0	0	0	0	1	0	0	0	0	0	0	0	0	0	0	0	0	0	1	0	0	0	0	0	0	0	0
root|Viruses|Duplodnaviria|Heunggongvirae|Uroviricota|Caudoviricetes|Caudovirales|Autographiviridae|Molineuxvirinae|Eracentumvirus|Erwinia virus S2	S	2733579	Viruses	Erwinia virus S2	1	0	0	0	0	0	0	0	0	0	0	0	2	1	0	1	0	0	1	0	0	0	0	0	0	0	0	1	2	1	0	0	0	0	0	1	0	0	0	0	0	1	0	0	0
root|Viruses|Duplodnaviria|Heunggongvirae|Uroviricota|Caudoviricetes|Caudovirales|Autographiviridae|Molineuxvirinae|Eracentumvirus|Erwinia virus S2	S1	2070198	Viruses	Erwinia phage vB_EamP-S2	1	0	0	0	0	0	0	0	0	0	0	0	2	1	0	1	0	0	1	0	0	0	0	0	0	0	0	1	2	1	0	0	0	0	0	1	0	0	0	0	0	1	0	0	0
root|Viruses|Duplodnaviria|Heunggongvirae|Uroviricota|Caudoviricetes|Caudovirales|Autographiviridae|Molineuxvirinae|Tuodvirus	G	2732927	Viruses	Tuodvirus	0	0	0	2	1	0	0	0	0	0	0	0	0	0	0	0	0	2	0	0	0	0	0	0	0	0	0	0	1	0	0	0	0	0	0	0	0	0	0	0	0	0	0	0	0
root|Viruses|Duplodnaviria|Heunggongvirae|Uroviricota|Caudoviricetes|Caudovirales|Autographiviridae|Molineuxvirinae|Tuodvirus|Lelliottia virus phD2B	S	2733580	Viruses	Lelliottia virus phD2B	0	0	0	2	1	0	0	0	0	0	0	0	0	0	0	0	0	2	0	0	0	0	0	0	0	0	0	0	1	0	0	0	0	0	0	0	0	0	0	0	0	0	0	0	0
root|Viruses|Duplodnaviria|Heunggongvirae|Uroviricota|Caudoviricetes|Caudovirales|Autographiviridae|Molineuxvirinae|Tuodvirus|Lelliottia virus phD2B	S1	1542498	Viruses	Lelliottia phage phD2B	0	0	0	2	1	0	0	0	0	0	0	0	0	0	0	0	0	2	0	0	0	0	0	0	0	0	0	0	1	0	0	0	0	0	0	0	0	0	0	0	0	0	0	0	0
root|Viruses|Duplodnaviria|Heunggongvirae|Uroviricota|Caudoviricetes|Caudovirales|Autographiviridae|Molineuxvirinae|Vectrevirus	G	2732928	Viruses	Vectrevirus	0	0	1	0	1	0	0	0	0	2	1	0	0	0	0	1	0	2	1	0	0	0	0	0	0	0	1	0	0	0	0	1	0	1	0	0	3	0	0	0	0	2	2	0	0
root|Viruses|Duplodnaviria|Heunggongvirae|Uroviricota|Caudoviricetes|Caudovirales|Autographiviridae|Molineuxvirinae|Vectrevirus|Citrobacter CrRp3	S	2733581	Viruses	Citrobacter CrRp3	0	0	0	0	0	0	0	0	0	1	0	0	0	0	0	0	0	1	1	0	0	0	0	0	0	0	1	0	0	0	0	0	0	0	0	0	0	0	0	0	0	1	1	0	0
root|Viruses|Duplodnaviria|Heunggongvirae|Uroviricota|Caudoviricetes|Caudovirales|Autographiviridae|Molineuxvirinae|Vectrevirus|Citrobacter CrRp3	S1	2079275	Viruses	Citrobacter phage vB_CroP_CrRp3	0	0	0	0	0	0	0	0	0	1	0	0	0	0	0	0	0	1	1	0	0	0	0	0	0	0	1	0	0	0	0	0	0	0	0	0	0	0	0	0	0	1	1	0	0
root|Viruses|Duplodnaviria|Heunggongvirae|Uroviricota|Caudoviricetes|Caudovirales|Autographiviridae|Molineuxvirinae|Vectrevirus|Escherichia virus VEc3	S	2053697	Viruses	Escherichia virus VEc3	0	0	0	0	0	0	0	0	0	0	1	0	0	0	0	1	0	0	0	0	0	0	0	0	0	0	0	0	0	0	0	0	0	0	0	0	0	0	0	0	0	0	0	0	0
root|Viruses|Duplodnaviria|Heunggongvirae|Uroviricota|Caudoviricetes|Caudovirales|Autographiviridae|Molineuxvirinae|Vectrevirus|Escherichia virus mutPK1A2	S	2047761	Viruses	Escherichia virus mutPK1A2	0	0	0	0	0	0	0	0	0	0	0	0	0	0	0	0	0	0	0	0	0	0	0	0	0	0	0	0	0	0	0	0	0	0	0	0	1	0	0	0	0	0	0	0	0
root|Viruses|Duplodnaviria|Heunggongvirae|Uroviricota|Caudoviricetes|Caudovirales|Autographiviridae|Molineuxvirinae|Zindervirus	G	542837	Viruses	Zindervirus	0	0	0	0	1	0	2	0	0	1	1	2	2	1	0	0	1	0	0	0	0	0	0	0	0	1	0	1	1	1	0	0	0	0	0	0	0	0	0	0	0	0	0	0	0
root|Viruses|Duplodnaviria|Heunggongvirae|Uroviricota|Caudoviricetes|Caudovirales|Autographiviridae|Molineuxvirinae|Zindervirus|Salmonella virus BP12B	S	2733588	Viruses	Salmonella virus BP12B	0	0	0	0	0	0	2	0	0	1	0	0	1	0	0	0	0	0	0	0	0	0	0	0	0	0	0	1	1	0	0	0	0	0	0	0	0	0	0	0	0	0	0	0	0
root|Viruses|Duplodnaviria|Heunggongvirae|Uroviricota|Caudoviricetes|Caudovirales|Autographiviridae|Molineuxvirinae|Zindervirus|Salmonella virus BP12B	S1	1543201	Viruses	Salmonella phage BP12B	0	0	0	0	0	0	2	0	0	1	0	0	1	0	0	0	0	0	0	0	0	0	0	0	0	0	0	1	1	0	0	0	0	0	0	0	0	0	0	0	0	0	0	0	0
root|Viruses|Duplodnaviria|Heunggongvirae|Uroviricota|Caudoviricetes|Caudovirales|Autographiviridae|Molineuxvirinae|Zindervirus|Salmonella virus SP6	S	194966	Viruses	Salmonella virus SP6	0	0	0	0	1	0	0	0	0	0	1	0	1	1	0	0	0	0	0	0	0	0	0	0	0	1	0	0	0	1	0	0	0	0	0	0	0	0	0	0	0	0	0	0	0
root|Viruses|Duplodnaviria|Heunggongvirae|Uroviricota|Caudoviricetes|Caudovirales|Autographiviridae|Molineuxvirinae|Zindervirus|unclassified Zindervirus	G1	979725	Viruses	unclassified Zindervirus	0	0	0	0	0	0	0	0	0	0	0	2	0	0	0	0	1	0	0	0	0	0	0	0	0	0	0	0	0	0	0	0	0	0	0	0	0	0	0	0	0	0	0	0	0
root|Viruses|Duplodnaviria|Heunggongvirae|Uroviricota|Caudoviricetes|Caudovirales|Autographiviridae|Molineuxvirinae|Zindervirus|unclassified Zindervirus	S	979726	Viruses	Enterobacteria phage UAB_Phi78	0	0	0	0	0	0	0	0	0	0	0	2	0	0	0	0	1	0	0	0	0	0	0	0	0	0	0	0	0	0	0	0	0	0	0	0	0	0	0	0	0	0	0	0	0
root|Viruses|Duplodnaviria|Heunggongvirae|Uroviricota|Caudoviricetes|Caudovirales|Autographiviridae|Napahaivirus	G	2560184	Viruses	Napahaivirus	0	0	0	1	0	0	0	0	0	0	0	0	0	0	0	1	0	0	0	0	0	0	0	0	0	0	0	0	0	0	0	0	0	0	0	0	0	0	0	0	0	0	0	0	0
root|Viruses|Duplodnaviria|Heunggongvirae|Uroviricota|Caudoviricetes|Caudovirales|Autographiviridae|Napahaivirus|Pseudomonas virus VSW3	S	2560686	Viruses	Pseudomonas virus VSW3	0	0	0	1	0	0	0	0	0	0	0	0	0	0	0	1	0	0	0	0	0	0	0	0	0	0	0	0	0	0	0	0	0	0	0	0	0	0	0	0	0	0	0	0	0
root|Viruses|Duplodnaviria|Heunggongvirae|Uroviricota|Caudoviricetes|Caudovirales|Autographiviridae|Napahaivirus|Pseudomonas virus VSW3|Pseudomonas phage VSW-3	S1	1852562	Viruses	Pseudomonas phage VSW-3	0	0	0	1	0	0	0	0	0	0	0	0	0	0	0	1	0	0	0	0	0	0	0	0	0	0	0	0	0	0	0	0	0	0	0	0	0	0	0	0	0	0	0	0	0
root|Viruses|Duplodnaviria|Heunggongvirae|Uroviricota|Caudoviricetes|Caudovirales|Autographiviridae|Nohivirus	G	2731959	Viruses	Nohivirus	1	1	0	3	0	0	1	0	1	2	1	1	1	1	0	0	1	0	0	0	0	0	0	0	0	0	0	0	2	0	0	0	0	0	0	0	0	0	0	0	0	0	0	0	0
root|Viruses|Duplodnaviria|Heunggongvirae|Uroviricota|Caudoviricetes|Caudovirales|Autographiviridae|Nohivirus|Nohivirus S31C1	S	2733937	Viruses	Nohivirus S31C1	1	1	0	3	0	0	1	0	1	2	1	1	1	1	0	0	1	0	0	0	0	0	0	0	0	0	0	0	2	0	0	0	0	0	0	0	0	0	0	0	0	0	0	0	0
root|Viruses|Duplodnaviria|Heunggongvirae|Uroviricota|Caudoviricetes|Caudovirales|Autographiviridae|Nohivirus|Nohivirus S31C1|uncultured phage_MedDCM-OCT-S31-C1	S1	2740800	Viruses	uncultured phage_MedDCM-OCT-S31-C1	1	1	0	3	0	0	1	0	1	2	1	1	1	1	0	0	1	0	0	0	0	0	0	0	0	0	0	0	2	0	0	0	0	0	0	0	0	0	0	0	0	0	0	0	0
root|Viruses|Duplodnaviria|Heunggongvirae|Uroviricota|Caudoviricetes|Caudovirales|Autographiviridae|Oinezvirus	G	2731960	Viruses	Oinezvirus	0	1	3	0	0	0	0	1	1	0	0	0	0	0	0	0	0	1	0	0	0	0	0	0	0	0	0	0	0	0	0	0	0	0	0	0	0	0	0	0	0	0	0	0	0
root|Viruses|Duplodnaviria|Heunggongvirae|Uroviricota|Caudoviricetes|Caudovirales|Autographiviridae|Oinezvirus|Oinezvirus S37C6	S	2733938	Viruses	Oinezvirus S37C6	0	1	3	0	0	0	0	1	1	0	0	0	0	0	0	0	0	1	0	0	0	0	0	0	0	0	0	0	0	0	0	0	0	0	0	0	0	0	0	0	0	0	0	0	0
root|Viruses|Duplodnaviria|Heunggongvirae|Uroviricota|Caudoviricetes|Caudovirales|Autographiviridae|Oinezvirus|Oinezvirus S37C6|uncultured phage_MedDCM-OCT-S37-C6	S1	2740804	Viruses	uncultured phage_MedDCM-OCT-S37-C6	0	1	3	0	0	0	0	1	1	0	0	0	0	0	0	0	0	1	0	0	0	0	0	0	0	0	0	0	0	0	0	0	0	0	0	0	0	0	0	0	0	0	0	0	0
root|Viruses|Duplodnaviria|Heunggongvirae|Uroviricota|Caudoviricetes|Caudovirales|Autographiviridae|Okabevirinae	F1	2731651	Viruses	Okabevirinae	3	3	1	1	4	7	5	3	3	0	0	3	0	1	1	0	2	13	30	0	0	2	0	1	8	1	0	4	1	2	0	1	0	0	0	0	1	0	0	2	1	1	0	0	1
root|Viruses|Duplodnaviria|Heunggongvirae|Uroviricota|Caudoviricetes|Caudovirales|Autographiviridae|Okabevirinae|Ampunavirus	G	2732929	Viruses	Ampunavirus	1	0	0	0	3	3	1	1	1	0	0	2	0	0	0	0	0	0	0	0	0	0	0	1	8	0	0	1	0	0	0	0	0	0	0	0	0	0	0	2	1	1	0	0	1
root|Viruses|Duplodnaviria|Heunggongvirae|Uroviricota|Caudoviricetes|Caudovirales|Autographiviridae|Okabevirinae|Ampunavirus|Burkholderia virus BpAMP1	S	2733589	Viruses	Burkholderia virus BpAMP1	0	0	0	0	3	0	1	1	1	0	0	2	0	0	0	0	0	0	0	0	0	0	0	1	0	0	0	1	0	0	0	0	0	0	0	0	0	0	0	0	0	1	0	0	1
root|Viruses|Duplodnaviria|Heunggongvirae|Uroviricota|Caudoviricetes|Caudovirales|Autographiviridae|Okabevirinae|Ampunavirus|Burkholderia virus BpAMP1	S1	1432428	Viruses	Burkholderia phage Bp-AMP1	0	0	0	0	3	0	1	1	1	0	0	2	0	0	0	0	0	0	0	0	0	0	0	1	0	0	0	1	0	0	0	0	0	0	0	0	0	0	0	0	0	1	0	0	1
root|Viruses|Duplodnaviria|Heunggongvirae|Uroviricota|Caudoviricetes|Caudovirales|Autographiviridae|Okabevirinae|Ampunavirus|Ralstonia virus RSPI1	S	2733590	Viruses	Ralstonia virus RSPI1	1	0	0	0	0	3	0	0	0	0	0	0	0	0	0	0	0	0	0	0	0	0	0	0	8	0	0	0	0	0	0	0	0	0	0	0	0	0	0	2	1	0	0	0	0
root|Viruses|Duplodnaviria|Heunggongvirae|Uroviricota|Caudoviricetes|Caudovirales|Autographiviridae|Okabevirinae|Ampunavirus|Ralstonia virus RSPI1	S1	1958965	Viruses	Ralstonia phage RS-PI-1	1	0	0	0	0	3	0	0	0	0	0	0	0	0	0	0	0	0	0	0	0	0	0	0	8	0	0	0	0	0	0	0	0	0	0	0	0	0	0	2	1	0	0	0	0
root|Viruses|Duplodnaviria|Heunggongvirae|Uroviricota|Caudoviricetes|Caudovirales|Autographiviridae|Okabevirinae|Higashivirus	G	2732930	Viruses	Higashivirus	0	0	0	0	1	3	2	2	0	0	0	1	0	0	0	0	1	13	30	0	0	2	0	0	0	0	0	2	0	1	0	0	0	0	0	0	1	0	0	0	0	0	0	0	0
root|Viruses|Duplodnaviria|Heunggongvirae|Uroviricota|Caudoviricetes|Caudovirales|Autographiviridae|Okabevirinae|Higashivirus|Ralstonia virus RSB1	S	2733591	Viruses	Ralstonia virus RSB1	0	0	0	0	1	1	0	2	0	0	0	1	0	0	0	0	0	6	1	0	0	2	0	0	0	0	0	0	0	0	0	0	0	0	0	0	1	0	0	0	0	0	0	0	0
root|Viruses|Duplodnaviria|Heunggongvirae|Uroviricota|Caudoviricetes|Caudovirales|Autographiviridae|Okabevirinae|Higashivirus|Ralstonia virus RSB1	S1	551790	Viruses	Ralstonia phage RSB1	0	0	0	0	1	1	0	2	0	0	0	1	0	0	0	0	0	6	1	0	0	2	0	0	0	0	0	0	0	0	0	0	0	0	0	0	1	0	0	0	0	0	0	0	0
root|Viruses|Duplodnaviria|Heunggongvirae|Uroviricota|Caudoviricetes|Caudovirales|Autographiviridae|Okabevirinae|Higashivirus|Ralstonia virus RsoP1IDN	S	2733592	Viruses	Ralstonia virus RsoP1IDN	0	0	0	0	0	2	2	0	0	0	0	0	0	0	0	0	1	7	29	0	0	0	0	0	0	0	0	2	0	1	0	0	0	0	0	0	0	0	0	0	0	0	0	0	0
root|Viruses|Duplodnaviria|Heunggongvirae|Uroviricota|Caudoviricetes|Caudovirales|Autographiviridae|Okabevirinae|Higashivirus|Ralstonia virus RsoP1IDN	S1	2060091	Viruses	Ralstonia phage RsoP1IDN	0	0	0	0	0	2	2	0	0	0	0	0	0	0	0	0	1	7	29	0	0	0	0	0	0	0	0	2	0	1	0	0	0	0	0	0	0	0	0	0	0	0	0	0	0
root|Viruses|Duplodnaviria|Heunggongvirae|Uroviricota|Caudoviricetes|Caudovirales|Autographiviridae|Okabevirinae|Mguuvirus	G	2732931	Viruses	Mguuvirus	2	2	0	0	0	0	2	0	2	0	0	0	0	1	0	0	0	0	0	0	0	0	0	0	0	0	0	0	0	0	0	0	0	0	0	0	0	0	0	0	0	0	0	0	0
root|Viruses|Duplodnaviria|Heunggongvirae|Uroviricota|Caudoviricetes|Caudovirales|Autographiviridae|Okabevirinae|Mguuvirus|Burkholderia virus JG068	S	2733593	Viruses	Burkholderia virus JG068	2	2	0	0	0	0	2	0	2	0	0	0	0	1	0	0	0	0	0	0	0	0	0	0	0	0	0	0	0	0	0	0	0	0	0	0	0	0	0	0	0	0	0	0	0
root|Viruses|Duplodnaviria|Heunggongvirae|Uroviricota|Caudoviricetes|Caudovirales|Autographiviridae|Okabevirinae|Mguuvirus|Burkholderia virus JG068	S1	1401297	Viruses	Burkholderia phage JG068	2	2	0	0	0	0	2	0	2	0	0	0	0	1	0	0	0	0	0	0	0	0	0	0	0	0	0	0	0	0	0	0	0	0	0	0	0	0	0	0	0	0	0	0	0
root|Viruses|Duplodnaviria|Heunggongvirae|Uroviricota|Caudoviricetes|Caudovirales|Autographiviridae|Okabevirinae|Risjevirus	G	2732932	Viruses	Risjevirus	0	0	0	0	0	1	0	0	0	0	0	0	0	0	0	0	1	0	0	0	0	0	0	0	0	1	0	0	1	0	0	1	0	0	0	0	0	0	0	0	0	0	0	0	0
root|Viruses|Duplodnaviria|Heunggongvirae|Uroviricota|Caudoviricetes|Caudovirales|Autographiviridae|Okabevirinae|Risjevirus|Ralstonia virus RSJ2	S	2733594	Viruses	Ralstonia virus RSJ2	0	0	0	0	0	0	0	0	0	0	0	0	0	0	0	0	1	0	0	0	0	0	0	0	0	1	0	0	1	0	0	0	0	0	0	0	0	0	0	0	0	0	0	0	0
root|Viruses|Duplodnaviria|Heunggongvirae|Uroviricota|Caudoviricetes|Caudovirales|Autographiviridae|Okabevirinae|Risjevirus|Ralstonia virus RSJ2	S1	1481785	Viruses	Ralstonia phage RSJ2	0	0	0	0	0	0	0	0	0	0	0	0	0	0	0	0	1	0	0	0	0	0	0	0	0	1	0	0	1	0	0	0	0	0	0	0	0	0	0	0	0	0	0	0	0
root|Viruses|Duplodnaviria|Heunggongvirae|Uroviricota|Caudoviricetes|Caudovirales|Autographiviridae|Okabevirinae|Risjevirus|Ralstonia virus RSJ5	S	2733595	Viruses	Ralstonia virus RSJ5	0	0	0	0	0	1	0	0	0	0	0	0	0	0	0	0	0	0	0	0	0	0	0	0	0	0	0	0	0	0	0	1	0	0	0	0	0	0	0	0	0	0	0	0	0
root|Viruses|Duplodnaviria|Heunggongvirae|Uroviricota|Caudoviricetes|Caudovirales|Autographiviridae|Okabevirinae|Risjevirus|Ralstonia virus RSJ5	S1	1538364	Viruses	Ralstonia phage RSJ5	0	0	0	0	0	1	0	0	0	0	0	0	0	0	0	0	0	0	0	0	0	0	0	0	0	0	0	0	0	0	0	1	0	0	0	0	0	0	0	0	0	0	0	0	0
root|Viruses|Duplodnaviria|Heunggongvirae|Uroviricota|Caudoviricetes|Caudovirales|Autographiviridae|Okabevirinae|Sukuvirus	G	2732933	Viruses	Sukuvirus	0	1	1	0	0	0	0	0	0	0	0	0	0	0	0	0	0	0	0	0	0	0	0	0	0	0	0	1	0	1	0	0	0	0	0	0	0	0	0	0	0	0	0	0	0
root|Viruses|Duplodnaviria|Heunggongvirae|Uroviricota|Caudoviricetes|Caudovirales|Autographiviridae|Okabevirinae|Sukuvirus|Ralstonia virus RSPII1	S	2733596	Viruses	Ralstonia virus RSPII1	0	1	1	0	0	0	0	0	0	0	0	0	0	0	0	0	0	0	0	0	0	0	0	0	0	0	0	1	0	1	0	0	0	0	0	0	0	0	0	0	0	0	0	0	0
root|Viruses|Duplodnaviria|Heunggongvirae|Uroviricota|Caudoviricetes|Caudovirales|Autographiviridae|Okabevirinae|Sukuvirus|Ralstonia virus RSPII1	S1	1932892	Viruses	Ralstonia phage RS-PII-1	0	1	1	0	0	0	0	0	0	0	0	0	0	0	0	0	0	0	0	0	0	0	0	0	0	0	0	1	0	1	0	0	0	0	0	0	0	0	0	0	0	0	0	0	0
root|Viruses|Duplodnaviria|Heunggongvirae|Uroviricota|Caudoviricetes|Caudovirales|Autographiviridae|Paadamvirus	G	2731961	Viruses	Paadamvirus	1	0	0	0	0	0	0	1	0	0	0	0	0	0	0	0	0	0	0	0	0	0	0	0	0	0	0	0	0	1	0	0	0	0	0	0	0	0	0	0	0	2	0	0	0
root|Viruses|Duplodnaviria|Heunggongvirae|Uroviricota|Caudoviricetes|Caudovirales|Autographiviridae|Paadamvirus|Rhizobium virus RHEph01	S	2733939	Viruses	Rhizobium virus RHEph01	1	0	0	0	0	0	0	1	0	0	0	0	0	0	0	0	0	0	0	0	0	0	0	0	0	0	0	0	0	1	0	0	0	0	0	0	0	0	0	0	0	2	0	0	0
root|Viruses|Duplodnaviria|Heunggongvirae|Uroviricota|Caudoviricetes|Caudovirales|Autographiviridae|Paadamvirus|Rhizobium virus RHEph01|Rhizobium phage RHEph01	S1	1220601	Viruses	Rhizobium phage RHEph01	1	0	0	0	0	0	0	1	0	0	0	0	0	0	0	0	0	0	0	0	0	0	0	0	0	0	0	0	0	1	0	0	0	0	0	0	0	0	0	0	0	2	0	0	0
root|Viruses|Duplodnaviria|Heunggongvirae|Uroviricota|Caudoviricetes|Caudovirales|Autographiviridae|Pairvirus	G	2731963	Viruses	Pairvirus	0	0	0	1	0	2	0	0	0	0	1	0	0	1	0	0	1	1	1	0	0	0	0	0	0	1	0	1	0	0	0	0	0	0	0	0	1	0	1	0	0	0	0	0	0
root|Viruses|Duplodnaviria|Heunggongvirae|Uroviricota|Caudoviricetes|Caudovirales|Autographiviridae|Pairvirus|Mesorhizobium virus Lo5R7ANS	S	2733941	Viruses	Mesorhizobium virus Lo5R7ANS	0	0	0	1	0	2	0	0	0	0	1	0	0	1	0	0	1	1	1	0	0	0	0	0	0	1	0	1	0	0	0	0	0	0	0	0	1	0	1	0	0	0	0	0	0
root|Viruses|Duplodnaviria|Heunggongvirae|Uroviricota|Caudoviricetes|Caudovirales|Autographiviridae|Pairvirus|Mesorhizobium virus Lo5R7ANS|Mesorhizobium phage vB_MloP_Lo5R7ANS	S1	1527771	Viruses	Mesorhizobium phage vB_MloP_Lo5R7ANS	0	0	0	1	0	2	0	0	0	0	1	0	0	1	0	0	1	1	1	0	0	0	0	0	0	1	0	1	0	0	0	0	0	0	0	0	1	0	1	0	0	0	0	0	0
root|Viruses|Duplodnaviria|Heunggongvirae|Uroviricota|Caudoviricetes|Caudovirales|Autographiviridae|Pedosvirus	G	2731964	Viruses	Pedosvirus	0	0	0	0	0	0	1	0	0	0	0	0	0	0	0	0	0	0	0	0	0	0	0	0	0	0	0	1	0	0	0	0	0	0	0	0	0	0	0	0	0	0	0	0	0
root|Viruses|Duplodnaviria|Heunggongvirae|Uroviricota|Caudoviricetes|Caudovirales|Autographiviridae|Pedosvirus|Pedosvirus S28C3	S	2733942	Viruses	Pedosvirus S28C3	0	0	0	0	0	0	1	0	0	0	0	0	0	0	0	0	0	0	0	0	0	0	0	0	0	0	0	1	0	0	0	0	0	0	0	0	0	0	0	0	0	0	0	0	0
root|Viruses|Duplodnaviria|Heunggongvirae|Uroviricota|Caudoviricetes|Caudovirales|Autographiviridae|Pedosvirus|Pedosvirus S28C3|uncultured phage_MedDCM-OCT-S28-C3	S1	2740802	Viruses	uncultured phage_MedDCM-OCT-S28-C3	0	0	0	0	0	0	1	0	0	0	0	0	0	0	0	0	0	0	0	0	0	0	0	0	0	0	0	1	0	0	0	0	0	0	0	0	0	0	0	0	0	0	0	0	0
root|Viruses|Duplodnaviria|Heunggongvirae|Uroviricota|Caudoviricetes|Caudovirales|Autographiviridae|Pelagivirus	G	2731966	Viruses	Pelagivirus	2	2	3	2	0	2	0	0	0	1	2	1	1	1	1	1	1	0	0	0	0	0	0	1	0	1	1	0	1	0	0	0	0	0	0	1	2	0	0	0	0	0	0	0	1
root|Viruses|Duplodnaviria|Heunggongvirae|Uroviricota|Caudoviricetes|Caudovirales|Autographiviridae|Pelagivirus|Pelagibacter virus HTVC019P	S	2733944	Viruses	Pelagibacter virus HTVC019P	1	1	1	1	0	2	0	0	0	1	1	1	1	1	1	1	1	0	0	0	0	0	0	1	0	1	1	0	1	0	0	0	0	0	0	0	0	0	0	0	0	0	0	0	0
root|Viruses|Duplodnaviria|Heunggongvirae|Uroviricota|Caudoviricetes|Caudovirales|Autographiviridae|Pelagivirus|Pelagibacter virus HTVC019P|Pelagibacter phage HTVC019P	S1	1283079	Viruses	Pelagibacter phage HTVC019P	1	1	1	1	0	2	0	0	0	1	1	1	1	1	1	1	1	0	0	0	0	0	0	1	0	1	1	0	1	0	0	0	0	0	0	0	0	0	0	0	0	0	0	0	0
root|Viruses|Duplodnaviria|Heunggongvirae|Uroviricota|Caudoviricetes|Caudovirales|Autographiviridae|Pelagivirus|Pelagivirus S35C6	S	2733945	Viruses	Pelagivirus S35C6	1	1	2	1	0	0	0	0	0	0	1	0	0	0	0	0	0	0	0	0	0	0	0	0	0	0	0	0	0	0	0	0	0	0	0	1	2	0	0	0	0	0	0	0	1
root|Viruses|Duplodnaviria|Heunggongvirae|Uroviricota|Caudoviricetes|Caudovirales|Autographiviridae|Pelagivirus|Pelagivirus S35C6|uncultured phage_MedDCM-OCT-S35-C6	S1	2741075	Viruses	uncultured phage_MedDCM-OCT-S35-C6	1	1	2	1	0	0	0	0	0	0	1	0	0	0	0	0	0	0	0	0	0	0	0	0	0	0	0	0	0	0	0	0	0	0	0	1	2	0	0	0	0	0	0	0	1
root|Viruses|Duplodnaviria|Heunggongvirae|Uroviricota|Caudoviricetes|Caudovirales|Autographiviridae|Percyvirus	G	2731967	Viruses	Percyvirus	0	0	0	0	1	1	7	0	0	3	1	0	1	0	0	2	0	1	1	0	0	0	0	0	0	0	0	0	0	0	0	0	0	0	0	0	1	0	0	1	0	0	1	0	0
root|Viruses|Duplodnaviria|Heunggongvirae|Uroviricota|Caudoviricetes|Caudovirales|Autographiviridae|Percyvirus|Caulobacter virus Percy	S	2733946	Viruses	Caulobacter virus Percy	0	0	0	0	1	1	7	0	0	3	1	0	1	0	0	2	0	1	1	0	0	0	0	0	0	0	0	0	0	0	0	0	0	0	0	0	1	0	0	1	0	0	1	0	0
root|Viruses|Duplodnaviria|Heunggongvirae|Uroviricota|Caudoviricetes|Caudovirales|Autographiviridae|Percyvirus|Caulobacter virus Percy|Caulobacter phage Percy	S1	1701809	Viruses	Caulobacter phage Percy	0	0	0	0	1	1	7	0	0	3	1	0	1	0	0	2	0	1	1	0	0	0	0	0	0	0	0	0	0	0	0	0	0	0	0	0	1	0	0	1	0	0	1	0	0
root|Viruses|Duplodnaviria|Heunggongvirae|Uroviricota|Caudoviricetes|Caudovirales|Autographiviridae|Piedvirus	G	2731968	Viruses	Piedvirus	2	1	3	0	1	0	0	0	1	1	2	1	0	6	0	1	1	1	0	0	0	1	0	0	0	0	0	0	1	0	0	0	0	0	0	0	0	0	0	0	1	1	0	0	0
root|Viruses|Duplodnaviria|Heunggongvirae|Uroviricota|Caudoviricetes|Caudovirales|Autographiviridae|Piedvirus|Delftia virus IMEDE1	S	2733947	Viruses	Delftia virus IMEDE1	2	1	3	0	1	0	0	0	1	1	2	1	0	6	0	1	1	1	0	0	0	1	0	0	0	0	0	0	1	0	0	0	0	0	0	0	0	0	0	0	1	1	0	0	0
root|Viruses|Duplodnaviria|Heunggongvirae|Uroviricota|Caudoviricetes|Caudovirales|Autographiviridae|Piedvirus|Delftia virus IMEDE1|Delftia phage IME-DE1	S1	1647385	Viruses	Delftia phage IME-DE1	2	1	3	0	1	0	0	0	1	1	2	1	0	6	0	1	1	1	0	0	0	1	0	0	0	0	0	0	1	0	0	0	0	0	0	0	0	0	0	0	1	1	0	0	0
root|Viruses|Duplodnaviria|Heunggongvirae|Uroviricota|Caudoviricetes|Caudovirales|Autographiviridae|Pollyceevirus	G	2560206	Viruses	Pollyceevirus	1	1	0	0	0	2	0	0	0	0	0	0	0	0	0	0	0	2	0	0	0	0	0	0	0	1	0	0	0	0	0	0	0	0	0	0	0	0	0	0	0	1	0	0	0
root|Viruses|Duplodnaviria|Heunggongvirae|Uroviricota|Caudoviricetes|Caudovirales|Autographiviridae|Pollyceevirus|Pseudomonas virus PollyC	S	2560679	Viruses	Pseudomonas virus PollyC	1	1	0	0	0	2	0	0	0	0	0	0	0	0	0	0	0	2	0	0	0	0	0	0	0	1	0	0	0	0	0	0	0	0	0	0	0	0	0	0	0	1	0	0	0
root|Viruses|Duplodnaviria|Heunggongvirae|Uroviricota|Caudoviricetes|Caudovirales|Autographiviridae|Pollyceevirus|Pseudomonas virus PollyC|Pseudomonas phage PollyC	S1	2079290	Viruses	Pseudomonas phage PollyC	1	1	0	0	0	2	0	0	0	0	0	0	0	0	0	0	0	2	0	0	0	0	0	0	0	1	0	0	0	0	0	0	0	0	0	0	0	0	0	0	0	1	0	0	0
root|Viruses|Duplodnaviria|Heunggongvirae|Uroviricota|Caudoviricetes|Caudovirales|Autographiviridae|Poseidonvirus	G	2731970	Viruses	Poseidonvirus	0	0	0	0	0	0	0	0	0	0	0	0	0	0	2	0	0	0	0	0	0	0	0	0	0	0	0	0	0	0	0	0	0	0	0	0	0	0	0	0	0	0	1	0	0
root|Viruses|Duplodnaviria|Heunggongvirae|Uroviricota|Caudoviricetes|Caudovirales|Autographiviridae|Poseidonvirus|Synechococcus virus SCBP4	S	2733949	Viruses	Synechococcus virus SCBP4	0	0	0	0	0	0	0	0	0	0	0	0	0	0	2	0	0	0	0	0	0	0	0	0	0	0	0	0	0	0	0	0	0	0	0	0	0	0	0	0	0	0	1	0	0
root|Viruses|Duplodnaviria|Heunggongvirae|Uroviricota|Caudoviricetes|Caudovirales|Autographiviridae|Poseidonvirus|Synechococcus virus SCBP4|Synechococcus phage S-CBP4	S1	754059	Viruses	Synechococcus phage S-CBP4	0	0	0	0	0	0	0	0	0	0	0	0	0	0	2	0	0	0	0	0	0	0	0	0	0	0	0	0	0	0	0	0	0	0	0	0	0	0	0	0	0	0	1	0	0
root|Viruses|Duplodnaviria|Heunggongvirae|Uroviricota|Caudoviricetes|Caudovirales|Autographiviridae|Powvirus	G	2731971	Viruses	Powvirus	0	0	0	0	0	0	0	0	0	0	0	0	0	1	0	0	0	0	0	0	0	0	0	0	0	0	0	0	0	0	0	0	0	0	0	0	0	0	0	0	0	0	0	0	0
root|Viruses|Duplodnaviria|Heunggongvirae|Uroviricota|Caudoviricetes|Caudovirales|Autographiviridae|Powvirus|Powvirus S08C41	S	2733950	Viruses	Powvirus S08C41	0	0	0	0	0	0	0	0	0	0	0	0	0	1	0	0	0	0	0	0	0	0	0	0	0	0	0	0	0	0	0	0	0	0	0	0	0	0	0	0	0	0	0	0	0
root|Viruses|Duplodnaviria|Heunggongvirae|Uroviricota|Caudoviricetes|Caudovirales|Autographiviridae|Powvirus|Powvirus S08C41|uncultured phage MedDCM-OCT-S08-C41	S1	743578	Viruses	uncultured phage MedDCM-OCT-S08-C41	0	0	0	0	0	0	0	0	0	0	0	0	0	1	0	0	0	0	0	0	0	0	0	0	0	0	0	0	0	0	0	0	0	0	0	0	0	0	0	0	0	0	0	0	0
root|Viruses|Duplodnaviria|Heunggongvirae|Uroviricota|Caudoviricetes|Caudovirales|Autographiviridae|Pradovirus	G	1985733	Viruses	Pradovirus	4	4	6	5	2	3	4	3	0	1	1	0	0	0	0	0	4	4	2	4	0	2	17	49	0	2	1	1	5	1	0	3	0	0	0	0	5	0	0	24	0	3	2	0	0
root|Viruses|Duplodnaviria|Heunggongvirae|Uroviricota|Caudoviricetes|Caudovirales|Autographiviridae|Pradovirus|Xanthomonas virus XAJ24	S	2733951	Viruses	Xanthomonas virus XAJ24	2	0	2	2	2	1	0	0	0	0	0	0	0	0	0	0	2	1	2	1	0	1	1	0	0	0	0	0	4	0	0	0	0	0	0	0	5	0	0	0	0	3	0	0	0
root|Viruses|Duplodnaviria|Heunggongvirae|Uroviricota|Caudoviricetes|Caudovirales|Autographiviridae|Pradovirus|Xanthomonas virus XAJ24|Xanthomonas phage XAJ24	S1	1775250	Viruses	Xanthomonas phage XAJ24	2	0	2	2	2	1	0	0	0	0	0	0	0	0	0	0	2	1	2	1	0	1	1	0	0	0	0	0	4	0	0	0	0	0	0	0	5	0	0	0	0	3	0	0	0
root|Viruses|Duplodnaviria|Heunggongvirae|Uroviricota|Caudoviricetes|Caudovirales|Autographiviridae|Pradovirus|Xanthomonas virus Xc10	S	2733952	Viruses	Xanthomonas virus Xc10	0	0	2	0	0	0	1	0	0	0	0	0	0	0	0	0	2	1	0	3	0	0	14	47	0	1	0	0	0	0	0	1	0	0	0	0	0	0	0	24	0	0	1	0	0
root|Viruses|Duplodnaviria|Heunggongvirae|Uroviricota|Caudoviricetes|Caudovirales|Autographiviridae|Pradovirus|Xanthomonas virus Xc10|Xanthomonas phage phi Xc10	S1	2024237	Viruses	Xanthomonas phage phi Xc10	0	0	2	0	0	0	1	0	0	0	0	0	0	0	0	0	2	1	0	3	0	0	14	47	0	1	0	0	0	0	0	1	0	0	0	0	0	0	0	24	0	0	1	0	0
root|Viruses|Duplodnaviria|Heunggongvirae|Uroviricota|Caudoviricetes|Caudovirales|Autographiviridae|Pradovirus|Xanthomonas virus f20	S	1985734	Viruses	Xanthomonas virus f20	0	0	0	1	0	0	2	1	0	0	1	0	0	0	0	0	0	0	0	0	0	0	1	2	0	0	1	0	0	0	0	0	0	0	0	0	0	0	0	0	0	0	0	0	0
root|Viruses|Duplodnaviria|Heunggongvirae|Uroviricota|Caudoviricetes|Caudovirales|Autographiviridae|Pradovirus|Xanthomonas virus f20|Xanthomonas phage f20-Xaj	S1	1784979	Viruses	Xanthomonas phage f20-Xaj	0	0	0	1	0	0	2	1	0	0	1	0	0	0	0	0	0	0	0	0	0	0	1	2	0	0	1	0	0	0	0	0	0	0	0	0	0	0	0	0	0	0	0	0	0
root|Viruses|Duplodnaviria|Heunggongvirae|Uroviricota|Caudoviricetes|Caudovirales|Autographiviridae|Pradovirus|Xanthomonas virus f30	S	1985735	Viruses	Xanthomonas virus f30	0	0	0	1	0	0	0	0	0	0	0	0	0	0	0	0	0	0	0	0	0	0	0	0	0	0	0	0	0	0	0	0	0	0	0	0	0	0	0	0	0	0	0	0	0
root|Viruses|Duplodnaviria|Heunggongvirae|Uroviricota|Caudoviricetes|Caudovirales|Autographiviridae|Pradovirus|Xanthomonas virus f30|Xanthomonas phage f30-Xaj	S1	1784981	Viruses	Xanthomonas phage f30-Xaj	0	0	0	1	0	0	0	0	0	0	0	0	0	0	0	0	0	0	0	0	0	0	0	0	0	0	0	0	0	0	0	0	0	0	0	0	0	0	0	0	0	0	0	0	0
root|Viruses|Duplodnaviria|Heunggongvirae|Uroviricota|Caudoviricetes|Caudovirales|Autographiviridae|Pradovirus|Xylella virus Prado	S	1985736	Viruses	Xylella virus Prado	0	3	1	1	0	2	0	1	0	0	0	0	0	0	0	0	0	1	0	0	0	1	1	0	0	0	0	0	0	1	0	1	0	0	0	0	0	0	0	0	0	0	0	0	0
root|Viruses|Duplodnaviria|Heunggongvirae|Uroviricota|Caudoviricetes|Caudovirales|Autographiviridae|Pradovirus|Xylella virus Prado|Xylella phage Prado	S1	1415146	Viruses	Xylella phage Prado	0	3	1	1	0	2	0	1	0	0	0	0	0	0	0	0	0	1	0	0	0	1	1	0	0	0	0	0	0	1	0	1	0	0	0	0	0	0	0	0	0	0	0	0	0
root|Viruses|Duplodnaviria|Heunggongvirae|Uroviricota|Caudoviricetes|Caudovirales|Autographiviridae|Pradovirus|unclassified Pradovirus	G1	2108328	Viruses	unclassified Pradovirus	2	1	0	0	0	0	1	0	0	0	0	0	0	0	0	0	0	0	0	0	0	0	0	0	0	1	0	0	0	0	0	1	0	0	0	0	0	0	0	0	0	0	0	0	0
root|Viruses|Duplodnaviria|Heunggongvirae|Uroviricota|Caudoviricetes|Caudovirales|Autographiviridae|Pradovirus|unclassified Pradovirus|Xylella phage Paz	S	1415145	Viruses	Xylella phage Paz	2	1	0	0	0	0	1	0	0	0	0	0	0	0	0	0	0	0	0	0	0	0	0	0	0	1	0	0	0	0	0	1	0	0	0	0	0	0	0	0	0	0	0	0	0
root|Viruses|Duplodnaviria|Heunggongvirae|Uroviricota|Caudoviricetes|Caudovirales|Autographiviridae|Qadamvirus	G	2731972	Viruses	Qadamvirus	0	0	0	0	1	0	0	0	0	0	0	0	0	0	0	0	0	1	0	0	0	0	0	0	0	0	0	1	0	0	0	0	0	0	0	0	0	0	0	0	0	0	0	0	0
root|Viruses|Duplodnaviria|Heunggongvirae|Uroviricota|Caudoviricetes|Caudovirales|Autographiviridae|Qadamvirus|Synechococcus virus SB28	S	2733953	Viruses	Synechococcus virus SB28	0	0	0	0	1	0	0	0	0	0	0	0	0	0	0	0	0	1	0	0	0	0	0	0	0	0	0	1	0	0	0	0	0	0	0	0	0	0	0	0	0	0	0	0	0
root|Viruses|Duplodnaviria|Heunggongvirae|Uroviricota|Caudoviricetes|Caudovirales|Autographiviridae|Qadamvirus|Synechococcus virus SB28|Synechococcus phage S-B28	S1	2545435	Viruses	Synechococcus phage S-B28	0	0	0	0	1	0	0	0	0	0	0	0	0	0	0	0	0	1	0	0	0	0	0	0	0	0	0	1	0	0	0	0	0	0	0	0	0	0	0	0	0	0	0	0	0
root|Viruses|Duplodnaviria|Heunggongvirae|Uroviricota|Caudoviricetes|Caudovirales|Autographiviridae|Scottvirus	G	2731973	Viruses	Scottvirus	1	0	0	2	0	3	2	0	0	1	0	1	0	0	0	0	2	0	0	1	0	0	0	0	0	2	0	1	2	0	0	0	0	0	1	0	1	0	0	0	0	0	0	0	0
root|Viruses|Duplodnaviria|Heunggongvirae|Uroviricota|Caudoviricetes|Caudovirales|Autographiviridae|Scottvirus|Sphingomonas virus Scott	S	2733954	Viruses	Sphingomonas virus Scott	1	0	0	2	0	3	2	0	0	1	0	1	0	0	0	0	2	0	0	1	0	0	0	0	0	2	0	1	2	0	0	0	0	0	1	0	1	0	0	0	0	0	0	0	0
root|Viruses|Duplodnaviria|Heunggongvirae|Uroviricota|Caudoviricetes|Caudovirales|Autographiviridae|Scottvirus|Sphingomonas virus Scott|Sphingomonas phage Scott	S1	2282912	Viruses	Sphingomonas phage Scott	1	0	0	2	0	3	2	0	0	1	0	1	0	0	0	0	2	0	0	1	0	0	0	0	0	2	0	1	2	0	0	0	0	0	1	0	1	0	0	0	0	0	0	0	0
root|Viruses|Duplodnaviria|Heunggongvirae|Uroviricota|Caudoviricetes|Caudovirales|Autographiviridae|Serkorvirus	G	2731975	Viruses	Serkorvirus	2	0	0	0	0	0	2	1	0	0	0	0	0	0	0	0	1	1	2	0	0	0	0	0	0	0	0	1	0	0	0	0	0	0	0	0	0	0	0	0	0	1	0	0	0
root|Viruses|Duplodnaviria|Heunggongvirae|Uroviricota|Caudoviricetes|Caudovirales|Autographiviridae|Serkorvirus|Ralstonia virus ITL1	S	2733956	Viruses	Ralstonia virus ITL1	2	0	0	0	0	0	2	1	0	0	0	0	0	0	0	0	1	1	2	0	0	0	0	0	0	0	0	1	0	0	0	0	0	0	0	0	0	0	0	0	0	1	0	0	0
root|Viruses|Duplodnaviria|Heunggongvirae|Uroviricota|Caudoviricetes|Caudovirales|Autographiviridae|Serkorvirus|Ralstonia virus ITL1|Ralstonia phage phiITL-1	S1	1597967	Viruses	Ralstonia phage phiITL-1	2	0	0	0	0	0	2	1	0	0	0	0	0	0	0	0	1	1	2	0	0	0	0	0	0	0	0	1	0	0	0	0	0	0	0	0	0	0	0	0	0	1	0	0	0
root|Viruses|Duplodnaviria|Heunggongvirae|Uroviricota|Caudoviricetes|Caudovirales|Autographiviridae|Sieqvirus	G	2731976	Viruses	Sieqvirus	3	1	0	2	0	1	0	0	0	1	1	0	0	1	1	0	2	3	0	0	0	0	0	0	0	0	0	0	0	0	0	0	0	0	0	0	0	0	1	0	0	0	0	1	1
root|Viruses|Duplodnaviria|Heunggongvirae|Uroviricota|Caudoviricetes|Caudovirales|Autographiviridae|Sieqvirus|Sieqvirus S42C7	S	2733957	Viruses	Sieqvirus S42C7	3	1	0	2	0	1	0	0	0	1	1	0	0	1	1	0	2	3	0	0	0	0	0	0	0	0	0	0	0	0	0	0	0	0	0	0	0	0	1	0	0	0	0	1	1
root|Viruses|Duplodnaviria|Heunggongvirae|Uroviricota|Caudoviricetes|Caudovirales|Autographiviridae|Sieqvirus|Sieqvirus S42C7|uncultured phage_MedDCM-OCT-S42-C7	S1	2741073	Viruses	uncultured phage_MedDCM-OCT-S42-C7	3	1	0	2	0	1	0	0	0	1	1	0	0	1	1	0	2	3	0	0	0	0	0	0	0	0	0	0	0	0	0	0	0	0	0	0	0	0	1	0	0	0	0	1	1
root|Viruses|Duplodnaviria|Heunggongvirae|Uroviricota|Caudoviricetes|Caudovirales|Autographiviridae|Slopekvirinae	F1	2731652	Viruses	Slopekvirinae	7	8	7	9	4	5	5	4	1	5	8	3	4	4	0	0	3	10	3	0	0	2	3	0	0	3	1	7	4	5	0	0	0	0	0	2	2	0	0	2	1	1	0	0	1
root|Viruses|Duplodnaviria|Heunggongvirae|Uroviricota|Caudoviricetes|Caudovirales|Autographiviridae|Slopekvirinae|Drulisvirus	G	1920774	Viruses	Drulisvirus	6	8	6	9	4	5	5	4	1	4	8	3	4	4	0	0	3	8	3	0	0	2	3	0	0	3	1	7	4	5	0	0	0	0	0	2	2	0	0	2	0	1	0	0	1
root|Viruses|Duplodnaviria|Heunggongvirae|Uroviricota|Caudoviricetes|Caudovirales|Autographiviridae|Slopekvirinae|Drulisvirus|Escherichia virus Minorna	S	2733598	Viruses	Escherichia virus Minorna	1	0	0	0	0	1	0	0	0	0	0	0	0	0	0	0	0	0	0	0	0	0	0	0	0	0	0	0	1	0	0	0	0	0	0	1	0	0	0	0	0	0	0	0	0
root|Viruses|Duplodnaviria|Heunggongvirae|Uroviricota|Caudoviricetes|Caudovirales|Autographiviridae|Slopekvirinae|Drulisvirus|Escherichia virus Minorna	S1	2547246	Viruses	Escherichia phage Minorna	1	0	0	0	0	1	0	0	0	0	0	0	0	0	0	0	0	0	0	0	0	0	0	0	0	0	0	0	1	0	0	0	0	0	0	1	0	0	0	0	0	0	0	0	0
root|Viruses|Duplodnaviria|Heunggongvirae|Uroviricota|Caudoviricetes|Caudovirales|Autographiviridae|Slopekvirinae|Drulisvirus|Klebsiella virus BO1E	S	2733600	Viruses	Klebsiella virus BO1E	2	3	2	6	3	2	3	2	1	2	2	2	1	1	0	0	1	4	3	0	0	1	3	0	0	2	0	3	2	3	0	0	0	0	0	1	0	0	0	0	0	0	0	0	0
root|Viruses|Duplodnaviria|Heunggongvirae|Uroviricota|Caudoviricetes|Caudovirales|Autographiviridae|Slopekvirinae|Drulisvirus|Klebsiella virus BO1E	S1	1555207	Viruses	Klebsiella phage phiBO1E	2	3	2	6	3	2	3	2	1	2	2	2	1	1	0	0	1	4	3	0	0	1	3	0	0	2	0	3	2	3	0	0	0	0	0	1	0	0	0	0	0	0	0	0	0
root|Viruses|Duplodnaviria|Heunggongvirae|Uroviricota|Caudoviricetes|Caudovirales|Autographiviridae|Slopekvirinae|Drulisvirus|Klebsiella virus KP34	S	1920777	Viruses	Klebsiella virus KP34	0	0	0	0	0	0	0	0	0	0	0	0	0	0	0	0	0	1	0	0	0	0	0	0	0	0	0	0	0	0	0	0	0	0	0	0	0	0	0	0	0	0	0	0	0
root|Viruses|Duplodnaviria|Heunggongvirae|Uroviricota|Caudoviricetes|Caudovirales|Autographiviridae|Slopekvirinae|Drulisvirus|Klebsiella virus KP34	S1	674081	Viruses	Klebsiella phage KP34	0	0	0	0	0	0	0	0	0	0	0	0	0	0	0	0	0	1	0	0	0	0	0	0	0	0	0	0	0	0	0	0	0	0	0	0	0	0	0	0	0	0	0	0	0
root|Viruses|Duplodnaviria|Heunggongvirae|Uroviricota|Caudoviricetes|Caudovirales|Autographiviridae|Slopekvirinae|Drulisvirus|Klebsiella virus KPRio2015	S	2733601	Viruses	Klebsiella virus KPRio2015	2	1	1	1	0	0	1	0	0	1	1	0	0	0	0	0	1	0	0	0	0	0	0	0	0	1	0	2	0	0	0	0	0	0	0	0	1	0	0	0	0	0	0	0	1
root|Viruses|Duplodnaviria|Heunggongvirae|Uroviricota|Caudoviricetes|Caudovirales|Autographiviridae|Slopekvirinae|Drulisvirus|Klebsiella virus KPRio2015	S1	1904925	Viruses	Klebsiella phage KP-Rio/2015	2	1	1	1	0	0	1	0	0	1	1	0	0	0	0	0	1	0	0	0	0	0	0	0	0	1	0	2	0	0	0	0	0	0	0	0	1	0	0	0	0	0	0	0	1
root|Viruses|Duplodnaviria|Heunggongvirae|Uroviricota|Caudoviricetes|Caudovirales|Autographiviridae|Slopekvirinae|Drulisvirus|Klebsiella virus KpS2	S	2733602	Viruses	Klebsiella virus KpS2	0	0	0	0	0	0	0	1	0	0	0	0	0	0	0	0	0	0	0	0	0	0	0	0	0	0	0	0	0	0	0	0	0	0	0	0	0	0	0	0	0	0	0	0	0
root|Viruses|Duplodnaviria|Heunggongvirae|Uroviricota|Caudoviricetes|Caudovirales|Autographiviridae|Slopekvirinae|Drulisvirus|Klebsiella virus KpS2	S1	1897515	Viruses	Klebsiella phage phiKpS2	0	0	0	0	0	0	0	1	0	0	0	0	0	0	0	0	0	0	0	0	0	0	0	0	0	0	0	0	0	0	0	0	0	0	0	0	0	0	0	0	0	0	0	0	0
root|Viruses|Duplodnaviria|Heunggongvirae|Uroviricota|Caudoviricetes|Caudovirales|Autographiviridae|Slopekvirinae|Drulisvirus|Klebsiella virus KpV475	S	1980958	Viruses	Klebsiella virus KpV475	0	1	1	0	0	0	0	0	0	0	3	0	2	0	0	0	0	0	0	0	0	0	0	0	0	0	1	2	0	0	0	0	0	0	0	0	0	0	0	0	0	0	0	0	0
root|Viruses|Duplodnaviria|Heunggongvirae|Uroviricota|Caudoviricetes|Caudovirales|Autographiviridae|Slopekvirinae|Drulisvirus|Klebsiella virus KpV475	S1	1852657	Viruses	Klebsiella phage KpV475	0	1	1	0	0	0	0	0	0	0	3	0	2	0	0	0	0	0	0	0	0	0	0	0	0	0	1	2	0	0	0	0	0	0	0	0	0	0	0	0	0	0	0	0	0
root|Viruses|Duplodnaviria|Heunggongvirae|Uroviricota|Caudoviricetes|Caudovirales|Autographiviridae|Slopekvirinae|Drulisvirus|Klebsiella virus KpV74	S	2733604	Viruses	Klebsiella virus KpV74	0	0	0	0	0	1	0	0	0	0	0	0	0	0	0	0	0	0	0	0	0	0	0	0	0	0	0	0	0	1	0	0	0	0	0	0	0	0	0	0	0	0	0	0	0
root|Viruses|Duplodnaviria|Heunggongvirae|Uroviricota|Caudoviricetes|Caudovirales|Autographiviridae|Slopekvirinae|Drulisvirus|Klebsiella virus KpV74	S1	1933773	Viruses	Klebsiella phage vB_KpnP_KpV74	0	0	0	0	0	1	0	0	0	0	0	0	0	0	0	0	0	0	0	0	0	0	0	0	0	0	0	0	0	1	0	0	0	0	0	0	0	0	0	0	0	0	0	0	0
root|Viruses|Duplodnaviria|Heunggongvirae|Uroviricota|Caudoviricetes|Caudovirales|Autographiviridae|Slopekvirinae|Drulisvirus|Klebsiella virus SU552A	S	1920779	Viruses	Klebsiella virus SU552A	0	0	0	1	0	0	0	0	0	1	0	0	0	0	0	0	0	0	0	0	0	1	0	0	0	0	0	0	0	0	0	0	0	0	0	0	0	0	0	0	0	0	0	0	0
root|Viruses|Duplodnaviria|Heunggongvirae|Uroviricota|Caudoviricetes|Caudovirales|Autographiviridae|Slopekvirinae|Drulisvirus|Klebsiella virus SU552A	S1	1610835	Viruses	Klebsiella phage vB_KpnP_SU552A	0	0	0	1	0	0	0	0	0	1	0	0	0	0	0	0	0	0	0	0	0	1	0	0	0	0	0	0	0	0	0	0	0	0	0	0	0	0	0	0	0	0	0	0	0
root|Viruses|Duplodnaviria|Heunggongvirae|Uroviricota|Caudoviricetes|Caudovirales|Autographiviridae|Slopekvirinae|Drulisvirus|Klebsiella virus myPSH1235	S	2733606	Viruses	Klebsiella virus myPSH1235	0	0	0	0	0	0	0	0	0	0	0	0	1	0	0	0	0	0	0	0	0	0	0	0	0	0	0	0	0	0	0	0	0	0	0	0	0	0	0	0	0	0	0	0	0
root|Viruses|Duplodnaviria|Heunggongvirae|Uroviricota|Caudoviricetes|Caudovirales|Autographiviridae|Slopekvirinae|Drulisvirus|Klebsiella virus myPSH1235	S1	2099390	Viruses	Klebsiella phage myPSH1235	0	0	0	0	0	0	0	0	0	0	0	0	1	0	0	0	0	0	0	0	0	0	0	0	0	0	0	0	0	0	0	0	0	0	0	0	0	0	0	0	0	0	0	0	0
root|Viruses|Duplodnaviria|Heunggongvirae|Uroviricota|Caudoviricetes|Caudovirales|Autographiviridae|Slopekvirinae|Drulisvirus|Shigella virus SFN6B	S	2733607	Viruses	Shigella virus SFN6B	0	0	1	0	1	0	1	0	0	0	0	0	0	0	0	0	0	0	0	0	0	0	0	0	0	0	0	0	0	0	0	0	0	0	0	0	0	0	0	0	0	0	0	0	0
root|Viruses|Duplodnaviria|Heunggongvirae|Uroviricota|Caudoviricetes|Caudovirales|Autographiviridae|Slopekvirinae|Drulisvirus|Shigella virus SFN6B	S1	1785176	Viruses	Shigella phage SFN6B	0	0	1	0	1	0	1	0	0	0	0	0	0	0	0	0	0	0	0	0	0	0	0	0	0	0	0	0	0	0	0	0	0	0	0	0	0	0	0	0	0	0	0	0	0
root|Viruses|Duplodnaviria|Heunggongvirae|Uroviricota|Caudoviricetes|Caudovirales|Autographiviridae|Slopekvirinae|Drulisvirus|unclassified Drulisvirus	G1	2562725	Viruses	unclassified Drulisvirus	0	0	0	0	0	0	0	0	0	0	0	0	0	0	0	0	0	0	0	0	0	0	0	0	0	0	0	0	0	0	0	0	0	0	0	0	0	0	0	0	0	0	0	0	0
root|Viruses|Duplodnaviria|Heunggongvirae|Uroviricota|Caudoviricetes|Caudovirales|Autographiviridae|Slopekvirinae|Drulisvirus|unclassified Drulisvirus	S	2530183	Viruses	Shigella phage HRP29	0	0	0	0	0	0	0	0	0	0	0	0	0	0	0	0	0	0	0	0	0	0	0	0	0	0	0	0	0	0	0	0	0	0	0	0	0	0	0	0	0	0	0	0	0
root|Viruses|Duplodnaviria|Heunggongvirae|Uroviricota|Caudoviricetes|Caudovirales|Autographiviridae|Slopekvirinae|Koutsourovirus	G	2732938	Viruses	Koutsourovirus	0	0	1	0	0	0	0	0	0	0	0	0	0	0	0	0	0	0	0	0	0	0	0	0	0	0	0	0	0	0	0	0	0	0	0	0	0	0	0	0	1	0	0	0	0
root|Viruses|Duplodnaviria|Heunggongvirae|Uroviricota|Caudoviricetes|Caudovirales|Autographiviridae|Slopekvirinae|Koutsourovirus|Enterobacter virus KDA1	S	2733608	Viruses	Enterobacter virus KDA1	0	0	1	0	0	0	0	0	0	0	0	0	0	0	0	0	0	0	0	0	0	0	0	0	0	0	0	0	0	0	0	0	0	0	0	0	0	0	0	0	1	0	0	0	0
root|Viruses|Duplodnaviria|Heunggongvirae|Uroviricota|Caudoviricetes|Caudovirales|Autographiviridae|Slopekvirinae|Koutsourovirus|Enterobacter virus KDA1	S1	1147139	Viruses	Enterobacter phage phiKDA1	0	0	1	0	0	0	0	0	0	0	0	0	0	0	0	0	0	0	0	0	0	0	0	0	0	0	0	0	0	0	0	0	0	0	0	0	0	0	0	0	1	0	0	0	0
root|Viruses|Duplodnaviria|Heunggongvirae|Uroviricota|Caudoviricetes|Caudovirales|Autographiviridae|Slopekvirinae|Novosibovirus	G	2732939	Viruses	Novosibovirus	1	0	0	0	0	0	0	0	0	1	0	0	0	0	0	0	0	2	0	0	0	0	0	0	0	0	0	0	0	0	0	0	0	0	0	0	0	0	0	0	0	0	0	0	0
root|Viruses|Duplodnaviria|Heunggongvirae|Uroviricota|Caudoviricetes|Caudovirales|Autographiviridae|Slopekvirinae|Novosibovirus|Proteus virus PM16	S	2733609	Viruses	Proteus virus PM16	1	0	0	0	0	0	0	0	0	0	0	0	0	0	0	0	0	0	0	0	0	0	0	0	0	0	0	0	0	0	0	0	0	0	0	0	0	0	0	0	0	0	0	0	0
root|Viruses|Duplodnaviria|Heunggongvirae|Uroviricota|Caudoviricetes|Caudovirales|Autographiviridae|Slopekvirinae|Novosibovirus|Proteus virus PM16	S1	1357704	Viruses	Proteus phage PM16	1	0	0	0	0	0	0	0	0	0	0	0	0	0	0	0	0	0	0	0	0	0	0	0	0	0	0	0	0	0	0	0	0	0	0	0	0	0	0	0	0	0	0	0	0
root|Viruses|Duplodnaviria|Heunggongvirae|Uroviricota|Caudoviricetes|Caudovirales|Autographiviridae|Slopekvirinae|Novosibovirus|unclassified Novosibovirus	G1	2749212	Viruses	unclassified Novosibovirus	0	0	0	0	0	0	0	0	0	1	0	0	0	0	0	0	0	2	0	0	0	0	0	0	0	0	0	0	0	0	0	0	0	0	0	0	0	0	0	0	0	0	0	0	0
root|Viruses|Duplodnaviria|Heunggongvirae|Uroviricota|Caudoviricetes|Caudovirales|Autographiviridae|Slopekvirinae|Novosibovirus|unclassified Novosibovirus	S	2508090	Viruses	Providencia phage vB_PstP_Stuart	0	0	0	0	0	0	0	0	0	1	0	0	0	0	0	0	0	2	0	0	0	0	0	0	0	0	0	0	0	0	0	0	0	0	0	0	0	0	0	0	0	0	0	0	0
root|Viruses|Duplodnaviria|Heunggongvirae|Uroviricota|Caudoviricetes|Caudovirales|Autographiviridae|Stompelvirus	G	2731977	Viruses	Stompelvirus	2	6	2	0	0	4	6	0	0	0	3	1	0	1	0	1	1	0	0	0	0	0	0	0	0	0	0	3	0	0	0	0	1	0	0	0	0	0	0	0	0	0	0	0	0
root|Viruses|Duplodnaviria|Heunggongvirae|Uroviricota|Caudoviricetes|Caudovirales|Autographiviridae|Stompelvirus|Ralstonia virus RPSC1	S	2733958	Viruses	Ralstonia virus RPSC1	2	6	2	0	0	4	6	0	0	0	3	1	0	1	0	1	1	0	0	0	0	0	0	0	0	0	0	3	0	0	0	0	1	0	0	0	0	0	0	0	0	0	0	0	0
root|Viruses|Duplodnaviria|Heunggongvirae|Uroviricota|Caudoviricetes|Caudovirales|Autographiviridae|Stompelvirus|Ralstonia virus RPSC1|Ralstonia phage RPSC1	S1	2041351	Viruses	Ralstonia phage RPSC1	2	6	2	0	0	4	6	0	0	0	3	1	0	1	0	1	1	0	0	0	0	0	0	0	0	0	0	3	0	0	0	0	1	0	0	0	0	0	0	0	0	0	0	0	0
root|Viruses|Duplodnaviria|Heunggongvirae|Uroviricota|Caudoviricetes|Caudovirales|Autographiviridae|Stopalavirus	G	2731978	Viruses	Stopalavirus	0	0	0	0	0	1	0	0	0	0	0	0	1	1	1	0	0	1	0	0	0	0	0	0	0	0	0	0	0	1	0	0	0	0	0	0	0	0	0	0	0	0	0	0	0
root|Viruses|Duplodnaviria|Heunggongvirae|Uroviricota|Caudoviricetes|Caudovirales|Autographiviridae|Stopalavirus|Stopalavirus S38C3	S	2733959	Viruses	Stopalavirus S38C3	0	0	0	0	0	1	0	0	0	0	0	0	1	1	1	0	0	1	0	0	0	0	0	0	0	0	0	0	0	1	0	0	0	0	0	0	0	0	0	0	0	0	0	0	0
root|Viruses|Duplodnaviria|Heunggongvirae|Uroviricota|Caudoviricetes|Caudovirales|Autographiviridae|Stopalavirus|Stopalavirus S38C3|uncultured phage_MedDCM-OCT-S38-C3	S1	2740803	Viruses	uncultured phage_MedDCM-OCT-S38-C3	0	0	0	0	0	1	0	0	0	0	0	0	1	1	1	0	0	1	0	0	0	0	0	0	0	0	0	0	0	1	0	0	0	0	0	0	0	0	0	0	0	0	0	0	0
root|Viruses|Duplodnaviria|Heunggongvirae|Uroviricota|Caudoviricetes|Caudovirales|Autographiviridae|Stopavirus	G	2731979	Viruses	Stopavirus	0	0	0	0	0	0	0	0	0	0	1	1	0	0	0	0	1	0	0	0	0	0	0	0	0	0	1	0	0	0	0	0	0	0	0	0	0	0	0	0	0	0	0	0	1
root|Viruses|Duplodnaviria|Heunggongvirae|Uroviricota|Caudoviricetes|Caudovirales|Autographiviridae|Stopavirus|Pelagibacter virus HTVC011P	S	2733960	Viruses	Pelagibacter virus HTVC011P	0	0	0	0	0	0	0	0	0	0	1	1	0	0	0	0	1	0	0	0	0	0	0	0	0	0	1	0	0	0	0	0	0	0	0	0	0	0	0	0	0	0	0	0	1
root|Viruses|Duplodnaviria|Heunggongvirae|Uroviricota|Caudoviricetes|Caudovirales|Autographiviridae|Stopavirus|Pelagibacter virus HTVC011P|Pelagibacter phage HTVC011P	S1	1283078	Viruses	Pelagibacter phage HTVC011P	0	0	0	0	0	0	0	0	0	0	1	1	0	0	0	0	1	0	0	0	0	0	0	0	0	0	1	0	0	0	0	0	0	0	0	0	0	0	0	0	0	0	0	0	1
root|Viruses|Duplodnaviria|Heunggongvirae|Uroviricota|Caudoviricetes|Caudovirales|Autographiviridae|Studiervirinae	F1	2731653	Viruses	Studiervirinae	18	15	21	7	10	14	22	13	5	9	15	228	7	25	5	24	7	16	5	41	11	54	18	24	2	37	6	7	15	5	3	99	31	123	19	219	56	5	1	16	96	47	7	3	51
root|Viruses|Duplodnaviria|Heunggongvirae|Uroviricota|Caudoviricetes|Caudovirales|Autographiviridae|Studiervirinae|Aarhusvirus	G	2732675	Viruses	Aarhusvirus	3	6	6	0	0	1	2	4	0	1	1	0	1	1	0	0	0	0	1	0	0	0	0	0	0	0	0	1	1	0	0	1	0	0	0	0	0	0	0	0	0	0	0	0	0
root|Viruses|Duplodnaviria|Heunggongvirae|Uroviricota|Caudoviricetes|Caudovirales|Autographiviridae|Studiervirinae|Aarhusvirus|Dickeya virus Luksen	S	2732764	Viruses	Dickeya virus Luksen	0	0	1	0	0	0	0	0	0	0	0	0	0	0	0	0	0	0	0	0	0	0	0	0	0	0	0	0	0	0	0	0	0	0	0	0	0	0	0	0	0	0	0	0	0
root|Viruses|Duplodnaviria|Heunggongvirae|Uroviricota|Caudoviricetes|Caudovirales|Autographiviridae|Studiervirinae|Aarhusvirus|Dickeya virus Luksen	S1	2320192	Viruses	Dickeya phage Luksen	0	0	1	0	0	0	0	0	0	0	0	0	0	0	0	0	0	0	0	0	0	0	0	0	0	0	0	0	0	0	0	0	0	0	0	0	0	0	0	0	0	0	0	0	0
root|Viruses|Duplodnaviria|Heunggongvirae|Uroviricota|Caudoviricetes|Caudovirales|Autographiviridae|Studiervirinae|Aarhusvirus|Dickeya virus Mysterion	S	2732765	Viruses	Dickeya virus Mysterion	0	0	0	0	0	0	1	0	0	1	0	0	0	0	0	0	0	0	0	0	0	0	0	0	0	0	0	0	0	0	0	0	0	0	0	0	0	0	0	0	0	0	0	0	0
root|Viruses|Duplodnaviria|Heunggongvirae|Uroviricota|Caudoviricetes|Caudovirales|Autographiviridae|Studiervirinae|Aarhusvirus|Dickeya virus Mysterion	S1	2320193	Viruses	Dickeya phage Mysterion	0	0	0	0	0	0	1	0	0	1	0	0	0	0	0	0	0	0	0	0	0	0	0	0	0	0	0	0	0	0	0	0	0	0	0	0	0	0	0	0	0	0	0	0	0
root|Viruses|Duplodnaviria|Heunggongvirae|Uroviricota|Caudoviricetes|Caudovirales|Autographiviridae|Studiervirinae|Apdecimavirus	G	2732676	Viruses	Apdecimavirus	2	0	0	0	0	0	2	0	0	0	0	0	0	0	0	0	1	0	0	0	0	0	0	0	0	0	0	0	0	0	0	0	0	0	0	0	0	0	0	0	0	0	0	0	0
root|Viruses|Duplodnaviria|Heunggongvirae|Uroviricota|Caudoviricetes|Caudovirales|Autographiviridae|Studiervirinae|Apdecimavirus|Yersinia virus AP10	S	2732775	Viruses	Yersinia virus AP10	2	0	0	0	0	0	2	0	0	0	0	0	0	0	0	0	1	0	0	0	0	0	0	0	0	0	0	0	0	0	0	0	0	0	0	0	0	0	0	0	0	0	0	0	0
root|Viruses|Duplodnaviria|Heunggongvirae|Uroviricota|Caudoviricetes|Caudovirales|Autographiviridae|Studiervirinae|Apdecimavirus|Yersinia virus AP10	S1	1735591	Viruses	Yersinia phage vB_YenP_AP10	2	0	0	0	0	0	2	0	0	0	0	0	0	0	0	0	1	0	0	0	0	0	0	0	0	0	0	0	0	0	0	0	0	0	0	0	0	0	0	0	0	0	0	0	0
root|Viruses|Duplodnaviria|Heunggongvirae|Uroviricota|Caudoviricetes|Caudovirales|Autographiviridae|Studiervirinae|Berlinvirus	G	2732677	Viruses	Berlinvirus	1	1	4	4	0	2	4	4	1	4	6	3	2	5	0	5	1	7	2	26	10	3	9	5	0	27	1	2	0	0	0	46	8	99	19	216	18	0	0	12	42	23	3	1	48
root|Viruses|Duplodnaviria|Heunggongvirae|Uroviricota|Caudoviricetes|Caudovirales|Autographiviridae|Studiervirinae|Berlinvirus|Escherichia virus BA14	S	2732778	Viruses	Escherichia virus BA14	0	0	0	0	0	0	0	0	0	0	0	0	0	0	0	0	0	0	0	0	0	0	0	1	0	0	0	0	0	0	0	0	0	1	0	0	0	0	0	0	0	0	0	0	0
root|Viruses|Duplodnaviria|Heunggongvirae|Uroviricota|Caudoviricetes|Caudovirales|Autographiviridae|Studiervirinae|Berlinvirus|Escherichia virus BA14	S1	532074	Viruses	Enterobacteria phage BA14	0	0	0	0	0	0	0	0	0	0	0	0	0	0	0	0	0	0	0	0	0	0	0	1	0	0	0	0	0	0	0	0	0	1	0	0	0	0	0	0	0	0	0	0	0
root|Viruses|Duplodnaviria|Heunggongvirae|Uroviricota|Caudoviricetes|Caudovirales|Autographiviridae|Studiervirinae|Berlinvirus|Escherichia virus S523	S	2732781	Viruses	Escherichia virus S523	0	0	0	2	0	0	2	0	0	0	0	0	0	0	0	0	0	0	0	0	0	0	0	0	0	0	0	1	0	0	0	0	0	0	0	0	0	0	0	0	0	0	0	0	0
root|Viruses|Duplodnaviria|Heunggongvirae|Uroviricota|Caudoviricetes|Caudovirales|Autographiviridae|Studiervirinae|Berlinvirus|Escherichia virus S523	S1	2233775	Viruses	Escherichia phage vB_EcoP_S523	0	0	0	2	0	0	2	0	0	0	0	0	0	0	0	0	0	0	0	0	0	0	0	0	0	0	0	1	0	0	0	0	0	0	0	0	0	0	0	0	0	0	0	0	0
root|Viruses|Duplodnaviria|Heunggongvirae|Uroviricota|Caudoviricetes|Caudovirales|Autographiviridae|Studiervirinae|Berlinvirus|Pectobacterium virus PP74	S	2732782	Viruses	Pectobacterium virus PP74	1	0	4	1	0	1	0	1	0	0	1	1	2	5	0	5	1	5	1	0	0	2	0	3	0	0	0	0	0	0	0	0	0	0	1	0	3	0	0	0	0	0	0	0	0
root|Viruses|Duplodnaviria|Heunggongvirae|Uroviricota|Caudoviricetes|Caudovirales|Autographiviridae|Studiervirinae|Berlinvirus|Pectobacterium virus PP74	S1	1916101	Viruses	Pectobacterium phage PP74	1	0	4	1	0	1	0	1	0	0	1	1	2	5	0	5	1	5	1	0	0	2	0	3	0	0	0	0	0	0	0	0	0	0	1	0	3	0	0	0	0	0	0	0	0
root|Viruses|Duplodnaviria|Heunggongvirae|Uroviricota|Caudoviricetes|Caudovirales|Autographiviridae|Studiervirinae|Berlinvirus|Salmonella virus BP12A	S	2732783	Viruses	Salmonella virus BP12A	0	0	0	0	0	0	1	0	0	1	0	0	0	0	0	0	0	1	0	0	0	0	0	0	0	0	0	0	0	0	0	0	0	0	0	0	0	0	0	0	0	0	0	0	0
root|Viruses|Duplodnaviria|Heunggongvirae|Uroviricota|Caudoviricetes|Caudovirales|Autographiviridae|Studiervirinae|Berlinvirus|Salmonella virus BP12A	S1	1543199	Viruses	Salmonella phage BP12A	0	0	0	0	0	0	1	0	0	1	0	0	0	0	0	0	0	1	0	0	0	0	0	0	0	0	0	0	0	0	0	0	0	0	0	0	0	0	0	0	0	0	0	0	0
root|Viruses|Duplodnaviria|Heunggongvirae|Uroviricota|Caudoviricetes|Caudovirales|Autographiviridae|Studiervirinae|Berlinvirus|Shigella virus A7	S	2732785	Viruses	Shigella virus A7	0	0	0	0	0	0	0	0	0	0	0	0	0	0	0	0	0	0	1	0	0	0	0	0	0	0	0	0	0	0	0	0	0	0	0	0	0	0	0	0	0	0	0	0	0
root|Viruses|Duplodnaviria|Heunggongvirae|Uroviricota|Caudoviricetes|Caudovirales|Autographiviridae|Studiervirinae|Berlinvirus|Shigella virus A7	S1	2562138	Viruses	Shigella phage VB_Ship_A7	0	0	0	0	0	0	0	0	0	0	0	0	0	0	0	0	0	0	1	0	0	0	0	0	0	0	0	0	0	0	0	0	0	0	0	0	0	0	0	0	0	0	0	0	0
root|Viruses|Duplodnaviria|Heunggongvirae|Uroviricota|Caudoviricetes|Caudovirales|Autographiviridae|Studiervirinae|Berlinvirus|Yersinia virus PYPS50	S	2732787	Viruses	Yersinia virus PYPS50	0	0	0	0	0	1	0	2	1	3	3	0	0	0	0	0	0	1	0	26	10	1	9	0	0	27	1	1	0	0	0	46	8	98	18	216	15	0	0	11	42	23	3	1	48
root|Viruses|Duplodnaviria|Heunggongvirae|Uroviricota|Caudoviricetes|Caudovirales|Autographiviridae|Studiervirinae|Berlinvirus|Yersinia virus PYPS50	S1	2321391	Viruses	Yersinia phage PYPS50	0	0	0	0	0	1	0	2	1	3	3	0	0	0	0	0	0	1	0	26	10	1	9	0	0	27	1	1	0	0	0	46	8	98	18	216	15	0	0	11	42	23	3	1	48
root|Viruses|Duplodnaviria|Heunggongvirae|Uroviricota|Caudoviricetes|Caudovirales|Autographiviridae|Studiervirinae|Berlinvirus|Yersinia virus Yepe2	S	2732788	Viruses	Yersinia virus Yepe2	0	1	0	1	0	0	0	1	0	0	1	2	0	0	0	0	0	0	0	0	0	0	0	0	0	0	0	0	0	0	0	0	0	0	0	0	0	0	0	1	0	0	0	0	0
root|Viruses|Duplodnaviria|Heunggongvirae|Uroviricota|Caudoviricetes|Caudovirales|Autographiviridae|Studiervirinae|Berlinvirus|Yersinia virus Yepe2	S1	532078	Viruses	Yersinia phage Yepe2	0	1	0	1	0	0	0	1	0	0	1	2	0	0	0	0	0	0	0	0	0	0	0	0	0	0	0	0	0	0	0	0	0	0	0	0	0	0	0	1	0	0	0	0	0
root|Viruses|Duplodnaviria|Heunggongvirae|Uroviricota|Caudoviricetes|Caudovirales|Autographiviridae|Studiervirinae|Caroctavirus	G	2732678	Viruses	Caroctavirus	0	0	0	0	0	0	0	0	0	0	0	0	0	1	0	0	0	0	0	0	0	0	0	0	0	0	0	0	0	0	0	0	0	0	0	0	0	0	0	0	0	0	0	0	0
root|Viruses|Duplodnaviria|Heunggongvirae|Uroviricota|Caudoviricetes|Caudovirales|Autographiviridae|Studiervirinae|Caroctavirus|Citrobacter virus CR8	S	2733611	Viruses	Citrobacter virus CR8	0	0	0	0	0	0	0	0	0	0	0	0	0	1	0	0	0	0	0	0	0	0	0	0	0	0	0	0	0	0	0	0	0	0	0	0	0	0	0	0	0	0	0	0	0
root|Viruses|Duplodnaviria|Heunggongvirae|Uroviricota|Caudoviricetes|Caudovirales|Autographiviridae|Studiervirinae|Caroctavirus|Citrobacter virus CR8	S1	1455076	Viruses	Citrobacter phage CR8	0	0	0	0	0	0	0	0	0	0	0	0	0	1	0	0	0	0	0	0	0	0	0	0	0	0	0	0	0	0	0	0	0	0	0	0	0	0	0	0	0	0	0	0	0
root|Viruses|Duplodnaviria|Heunggongvirae|Uroviricota|Caudoviricetes|Caudovirales|Autographiviridae|Studiervirinae|Chatterjeevirus	G	2732679	Viruses	Chatterjeevirus	0	0	0	0	0	0	0	0	0	0	0	1	0	0	0	0	0	0	0	0	0	0	0	0	0	1	0	0	0	0	0	0	0	0	0	0	0	0	0	0	0	0	0	0	0
root|Viruses|Duplodnaviria|Heunggongvirae|Uroviricota|Caudoviricetes|Caudovirales|Autographiviridae|Studiervirinae|Chatterjeevirus|Vibrio virus ICP3	S	2733612	Viruses	Vibrio virus ICP3	0	0	0	0	0	0	0	0	0	0	0	1	0	0	0	0	0	0	0	0	0	0	0	0	0	0	0	0	0	0	0	0	0	0	0	0	0	0	0	0	0	0	0	0	0
root|Viruses|Duplodnaviria|Heunggongvirae|Uroviricota|Caudoviricetes|Caudovirales|Autographiviridae|Studiervirinae|Chatterjeevirus|Vibrio virus ICP3	S1	979535	Viruses	Vibrio phage ICP3	0	0	0	0	0	0	0	0	0	0	0	1	0	0	0	0	0	0	0	0	0	0	0	0	0	0	0	0	0	0	0	0	0	0	0	0	0	0	0	0	0	0	0	0	0
root|Viruses|Duplodnaviria|Heunggongvirae|Uroviricota|Caudoviricetes|Caudovirales|Autographiviridae|Studiervirinae|Chatterjeevirus|Vibrio virus N4	S	2733613	Viruses	Vibrio virus N4	0	0	0	0	0	0	0	0	0	0	0	0	0	0	0	0	0	0	0	0	0	0	0	0	0	1	0	0	0	0	0	0	0	0	0	0	0	0	0	0	0	0	0	0	0
root|Viruses|Duplodnaviria|Heunggongvirae|Uroviricota|Caudoviricetes|Caudovirales|Autographiviridae|Studiervirinae|Chatterjeevirus|Vibrio virus N4	S1	644563	Viruses	Vibrio phage N4	0	0	0	0	0	0	0	0	0	0	0	0	0	0	0	0	0	0	0	0	0	0	0	0	0	1	0	0	0	0	0	0	0	0	0	0	0	0	0	0	0	0	0	0	0
root|Viruses|Duplodnaviria|Heunggongvirae|Uroviricota|Caudoviricetes|Caudovirales|Autographiviridae|Studiervirinae|Eapunavirus	G	2732680	Viruses	Eapunavirus	0	0	0	0	0	0	0	0	0	0	0	0	0	0	0	0	1	0	0	0	0	0	0	0	0	0	0	0	0	0	0	0	0	0	0	0	0	0	0	0	0	0	0	0	0
root|Viruses|Duplodnaviria|Heunggongvirae|Uroviricota|Caudoviricetes|Caudovirales|Autographiviridae|Studiervirinae|Eapunavirus|Enterobacter virus Eap1	S	2733615	Viruses	Enterobacter virus Eap1	0	0	0	0	0	0	0	0	0	0	0	0	0	0	0	0	1	0	0	0	0	0	0	0	0	0	0	0	0	0	0	0	0	0	0	0	0	0	0	0	0	0	0	0	0
root|Viruses|Duplodnaviria|Heunggongvirae|Uroviricota|Caudoviricetes|Caudovirales|Autographiviridae|Studiervirinae|Eapunavirus|Enterobacter virus Eap1	S1	1587520	Viruses	Enterobacter phage phiEap-1	0	0	0	0	0	0	0	0	0	0	0	0	0	0	0	0	1	0	0	0	0	0	0	0	0	0	0	0	0	0	0	0	0	0	0	0	0	0	0	0	0	0	0	0	0
root|Viruses|Duplodnaviria|Heunggongvirae|Uroviricota|Caudoviricetes|Caudovirales|Autographiviridae|Studiervirinae|Elunavirus	G	2732681	Viruses	Elunavirus	0	0	0	0	1	0	1	2	0	0	0	0	0	0	0	0	0	0	0	0	0	0	0	0	0	0	0	0	0	0	0	0	0	0	0	0	0	0	0	0	0	0	0	0	0
root|Viruses|Duplodnaviria|Heunggongvirae|Uroviricota|Caudoviricetes|Caudovirales|Autographiviridae|Studiervirinae|Elunavirus|Erwinia virus L1	S	2733616	Viruses	Erwinia virus L1	0	0	0	0	1	0	1	2	0	0	0	0	0	0	0	0	0	0	0	0	0	0	0	0	0	0	0	0	0	0	0	0	0	0	0	0	0	0	0	0	0	0	0	0	0
root|Viruses|Duplodnaviria|Heunggongvirae|Uroviricota|Caudoviricetes|Caudovirales|Autographiviridae|Studiervirinae|Elunavirus|Erwinia virus L1	S1	1051673	Viruses	Erwinia phage vB_EamP-L1	0	0	0	0	1	0	1	2	0	0	0	0	0	0	0	0	0	0	0	0	0	0	0	0	0	0	0	0	0	0	0	0	0	0	0	0	0	0	0	0	0	0	0	0	0
root|Viruses|Duplodnaviria|Heunggongvirae|Uroviricota|Caudoviricetes|Caudovirales|Autographiviridae|Studiervirinae|Ghunavirus	G	2732683	Viruses	Ghunavirus	2	0	3	2	0	0	1	0	1	0	1	0	0	0	0	1	0	0	0	0	0	0	0	0	0	2	1	0	1	1	0	0	0	0	0	0	1	0	0	0	0	0	0	0	0
root|Viruses|Duplodnaviria|Heunggongvirae|Uroviricota|Caudoviricetes|Caudovirales|Autographiviridae|Studiervirinae|Ghunavirus|Pseudomonas virus 17A	S	2733618	Viruses	Pseudomonas virus 17A	1	0	2	0	0	0	0	0	1	0	0	0	0	0	0	1	0	0	0	0	0	0	0	0	0	2	1	0	1	1	0	0	0	0	0	0	1	0	0	0	0	0	0	0	0
root|Viruses|Duplodnaviria|Heunggongvirae|Uroviricota|Caudoviricetes|Caudovirales|Autographiviridae|Studiervirinae|Ghunavirus|Pseudomonas virus 17A	S1	1729936	Viruses	Pseudomonas phage 17A	1	0	2	0	0	0	0	0	1	0	0	0	0	0	0	1	0	0	0	0	0	0	0	0	0	2	1	0	1	1	0	0	0	0	0	0	1	0	0	0	0	0	0	0	0
root|Viruses|Duplodnaviria|Heunggongvirae|Uroviricota|Caudoviricetes|Caudovirales|Autographiviridae|Studiervirinae|Ghunavirus|Pseudomonas virus Henninger	S	2733619	Viruses	Pseudomonas virus Henninger	0	0	1	1	0	0	0	0	0	0	0	0	0	0	0	0	0	0	0	0	0	0	0	0	0	0	0	0	0	0	0	0	0	0	0	0	0	0	0	0	0	0	0	0	0
root|Viruses|Duplodnaviria|Heunggongvirae|Uroviricota|Caudoviricetes|Caudovirales|Autographiviridae|Studiervirinae|Ghunavirus|Pseudomonas virus Henninger	S1	2079287	Viruses	Pseudomonas phage Henninger	0	0	1	1	0	0	0	0	0	0	0	0	0	0	0	0	0	0	0	0	0	0	0	0	0	0	0	0	0	0	0	0	0	0	0	0	0	0	0	0	0	0	0	0	0
root|Viruses|Duplodnaviria|Heunggongvirae|Uroviricota|Caudoviricetes|Caudovirales|Autographiviridae|Studiervirinae|Ghunavirus|Pseudomonas virus PhiPsa17	S	2733622	Viruses	Pseudomonas virus PhiPsa17	1	0	0	0	0	0	0	0	0	0	0	0	0	0	0	0	0	0	0	0	0	0	0	0	0	0	0	0	0	0	0	0	0	0	0	0	0	0	0	0	0	0	0	0	0
root|Viruses|Duplodnaviria|Heunggongvirae|Uroviricota|Caudoviricetes|Caudovirales|Autographiviridae|Studiervirinae|Ghunavirus|Pseudomonas virus PhiPsa17	S1	1629654	Viruses	Pseudomonas phage phiPsa17	1	0	0	0	0	0	0	0	0	0	0	0	0	0	0	0	0	0	0	0	0	0	0	0	0	0	0	0	0	0	0	0	0	0	0	0	0	0	0	0	0	0	0	0	0
root|Viruses|Duplodnaviria|Heunggongvirae|Uroviricota|Caudoviricetes|Caudovirales|Autographiviridae|Studiervirinae|Ghunavirus|Pseudomonas virus WRT	S	1981932	Viruses	Pseudomonas virus WRT	0	0	0	1	0	0	0	0	0	0	0	0	0	0	0	0	0	0	0	0	0	0	0	0	0	0	0	0	0	0	0	0	0	0	0	0	0	0	0	0	0	0	0	0	0
root|Viruses|Duplodnaviria|Heunggongvirae|Uroviricota|Caudoviricetes|Caudovirales|Autographiviridae|Studiervirinae|Ghunavirus|Pseudomonas virus shl2	S	2733624	Viruses	Pseudomonas virus shl2	0	0	0	0	0	0	1	0	0	0	1	0	0	0	0	0	0	0	0	0	0	0	0	0	0	0	0	0	0	0	0	0	0	0	0	0	0	0	0	0	0	0	0	0	0
root|Viruses|Duplodnaviria|Heunggongvirae|Uroviricota|Caudoviricetes|Caudovirales|Autographiviridae|Studiervirinae|Ghunavirus|Pseudomonas virus shl2	S1	1729933	Viruses	Pseudomonas phage shl2	0	0	0	0	0	0	1	0	0	0	1	0	0	0	0	0	0	0	0	0	0	0	0	0	0	0	0	0	0	0	0	0	0	0	0	0	0	0	0	0	0	0	0	0	0
root|Viruses|Duplodnaviria|Heunggongvirae|Uroviricota|Caudoviricetes|Caudovirales|Autographiviridae|Studiervirinae|Helsettvirus	G	2732684	Viruses	Helsettvirus	0	0	0	0	0	1	1	0	0	0	0	0	0	0	0	0	1	0	0	0	0	0	0	0	0	0	0	0	0	0	0	0	0	0	0	0	0	0	0	0	0	0	0	0	0
root|Viruses|Duplodnaviria|Heunggongvirae|Uroviricota|Caudoviricetes|Caudovirales|Autographiviridae|Studiervirinae|Helsettvirus|Yersinia virus fPS59	S	2733627	Viruses	Yersinia virus fPS59	0	0	0	0	0	0	1	0	0	0	0	0	0	0	0	0	0	0	0	0	0	0	0	0	0	0	0	0	0	0	0	0	0	0	0	0	0	0	0	0	0	0	0	0	0
root|Viruses|Duplodnaviria|Heunggongvirae|Uroviricota|Caudoviricetes|Caudovirales|Autographiviridae|Studiervirinae|Helsettvirus|Yersinia virus fPS59	S1	2052754	Viruses	Yersinia phage fPS-59	0	0	0	0	0	0	1	0	0	0	0	0	0	0	0	0	0	0	0	0	0	0	0	0	0	0	0	0	0	0	0	0	0	0	0	0	0	0	0	0	0	0	0	0	0
root|Viruses|Duplodnaviria|Heunggongvirae|Uroviricota|Caudoviricetes|Caudovirales|Autographiviridae|Studiervirinae|Helsettvirus|Yersinia virus fPS9	S	2733625	Viruses	Yersinia virus fPS9	0	0	0	0	0	1	0	0	0	0	0	0	0	0	0	0	0	0	0	0	0	0	0	0	0	0	0	0	0	0	0	0	0	0	0	0	0	0	0	0	0	0	0	0	0
root|Viruses|Duplodnaviria|Heunggongvirae|Uroviricota|Caudoviricetes|Caudovirales|Autographiviridae|Studiervirinae|Helsettvirus|Yersinia virus fPS9	S1	2052746	Viruses	Yersinia phage fPS-9	0	0	0	0	0	1	0	0	0	0	0	0	0	0	0	0	0	0	0	0	0	0	0	0	0	0	0	0	0	0	0	0	0	0	0	0	0	0	0	0	0	0	0	0	0
root|Viruses|Duplodnaviria|Heunggongvirae|Uroviricota|Caudoviricetes|Caudovirales|Autographiviridae|Studiervirinae|Jarilovirus	G	2732685	Viruses	Jarilovirus	0	0	0	0	1	0	0	0	0	0	0	0	0	0	0	0	0	0	0	0	0	0	0	0	0	0	0	0	0	0	0	0	0	0	0	0	0	0	0	0	0	0	0	0	0
root|Viruses|Duplodnaviria|Heunggongvirae|Uroviricota|Caudoviricetes|Caudovirales|Autographiviridae|Studiervirinae|Jarilovirus|Pectobacterium virus Jarilo	S	2733629	Viruses	Pectobacterium virus Jarilo	0	0	0	0	1	0	0	0	0	0	0	0	0	0	0	0	0	0	0	0	0	0	0	0	0	0	0	0	0	0	0	0	0	0	0	0	0	0	0	0	0	0	0	0	0
root|Viruses|Duplodnaviria|Heunggongvirae|Uroviricota|Caudoviricetes|Caudovirales|Autographiviridae|Studiervirinae|Jarilovirus|Pectobacterium virus Jarilo	S1	2163634	Viruses	Pectobacterium phage Jarilo	0	0	0	0	1	0	0	0	0	0	0	0	0	0	0	0	0	0	0	0	0	0	0	0	0	0	0	0	0	0	0	0	0	0	0	0	0	0	0	0	0	0	0	0	0
root|Viruses|Duplodnaviria|Heunggongvirae|Uroviricota|Caudoviricetes|Caudovirales|Autographiviridae|Studiervirinae|Kayfunavirus	G	2732686	Viruses	Kayfunavirus	2	2	2	0	3	3	3	0	1	0	1	2	2	12	3	1	0	2	1	2	0	2	7	0	0	0	0	0	9	0	3	29	17	13	0	3	4	1	0	0	28	6	4	0	1
root|Viruses|Duplodnaviria|Heunggongvirae|Uroviricota|Caudoviricetes|Caudovirales|Autographiviridae|Studiervirinae|Kayfunavirus|Citrobacter virus CR44b	S	2733630	Viruses	Citrobacter virus CR44b	0	0	0	0	0	0	0	0	0	0	0	0	1	0	0	0	0	0	0	0	0	0	0	0	0	0	0	0	0	0	0	0	0	0	0	0	0	0	0	0	0	0	0	0	0
root|Viruses|Duplodnaviria|Heunggongvirae|Uroviricota|Caudoviricetes|Caudovirales|Autographiviridae|Studiervirinae|Kayfunavirus|Citrobacter virus CR44b	S1	1455075	Viruses	Citrobacter phage CR44b	0	0	0	0	0	0	0	0	0	0	0	0	1	0	0	0	0	0	0	0	0	0	0	0	0	0	0	0	0	0	0	0	0	0	0	0	0	0	0	0	0	0	0	0	0
root|Viruses|Duplodnaviria|Heunggongvirae|Uroviricota|Caudoviricetes|Caudovirales|Autographiviridae|Studiervirinae|Kayfunavirus|Cronobacter virus Dev2	S	2733633	Viruses	Cronobacter virus Dev2	0	0	0	0	0	0	0	0	0	0	0	0	0	0	0	0	0	0	0	1	0	0	0	0	0	0	0	0	0	0	0	0	0	0	0	0	0	0	0	0	0	0	0	0	0
root|Viruses|Duplodnaviria|Heunggongvirae|Uroviricota|Caudoviricetes|Caudovirales|Autographiviridae|Studiervirinae|Kayfunavirus|Cronobacter virus Dev2	S1	1410331	Viruses	Cronobacter phage Dev2	0	0	0	0	0	0	0	0	0	0	0	0	0	0	0	0	0	0	0	1	0	0	0	0	0	0	0	0	0	0	0	0	0	0	0	0	0	0	0	0	0	0	0	0	0
root|Viruses|Duplodnaviria|Heunggongvirae|Uroviricota|Caudoviricetes|Caudovirales|Autographiviridae|Studiervirinae|Kayfunavirus|Enterobacter virus EcpYZU01	S	2733635	Viruses	Enterobacter virus EcpYZU01	0	0	0	0	0	0	0	0	0	0	0	0	0	2	0	0	0	0	0	0	0	0	0	0	0	0	0	0	1	0	0	0	0	0	0	0	0	0	0	0	0	0	0	0	0
root|Viruses|Duplodnaviria|Heunggongvirae|Uroviricota|Caudoviricetes|Caudovirales|Autographiviridae|Studiervirinae|Kayfunavirus|Enterobacter virus EcpYZU01	S1	2483604	Viruses	Enterobacter phage EcpYZU01	0	0	0	0	0	0	0	0	0	0	0	0	0	2	0	0	0	0	0	0	0	0	0	0	0	0	0	0	1	0	0	0	0	0	0	0	0	0	0	0	0	0	0	0	0
root|Viruses|Duplodnaviria|Heunggongvirae|Uroviricota|Caudoviricetes|Caudovirales|Autographiviridae|Studiervirinae|Kayfunavirus|Escherichia virus IMM002	S	2733639	Viruses	Escherichia virus IMM002	0	0	0	0	0	0	1	0	0	0	0	0	0	0	0	1	0	1	0	0	0	0	0	0	0	0	0	0	0	0	0	0	0	0	0	0	0	0	0	0	0	0	0	0	0
root|Viruses|Duplodnaviria|Heunggongvirae|Uroviricota|Caudoviricetes|Caudovirales|Autographiviridae|Studiervirinae|Kayfunavirus|Escherichia virus IMM002	S1	2041760	Viruses	Escherichia phage IMM-002	0	0	0	0	0	0	1	0	0	0	0	0	0	0	0	1	0	1	0	0	0	0	0	0	0	0	0	0	0	0	0	0	0	0	0	0	0	0	0	0	0	0	0	0	0
root|Viruses|Duplodnaviria|Heunggongvirae|Uroviricota|Caudoviricetes|Caudovirales|Autographiviridae|Studiervirinae|Kayfunavirus|Escherichia virus LM33P1	S	2733641	Viruses	Escherichia virus LM33P1	0	0	0	0	2	0	0	0	0	0	0	1	0	0	0	0	0	0	0	0	0	0	0	0	0	0	0	0	0	0	0	0	0	0	0	0	0	0	0	0	0	0	0	0	0
root|Viruses|Duplodnaviria|Heunggongvirae|Uroviricota|Caudoviricetes|Caudovirales|Autographiviridae|Studiervirinae|Kayfunavirus|Escherichia virus LM33P1	S1	1788294	Viruses	Escherichia phage LM33_P1	0	0	0	0	2	0	0	0	0	0	0	1	0	0	0	0	0	0	0	0	0	0	0	0	0	0	0	0	0	0	0	0	0	0	0	0	0	0	0	0	0	0	0	0	0
root|Viruses|Duplodnaviria|Heunggongvirae|Uroviricota|Caudoviricetes|Caudovirales|Autographiviridae|Studiervirinae|Kayfunavirus|Escherichia virus PE3-1	S	2733642	Viruses	Escherichia virus PE3-1	0	0	0	0	0	0	0	0	0	0	0	0	0	1	0	0	0	0	0	0	0	0	0	0	0	0	0	0	0	0	0	0	0	0	0	0	0	0	0	0	0	0	0	0	0
root|Viruses|Duplodnaviria|Heunggongvirae|Uroviricota|Caudoviricetes|Caudovirales|Autographiviridae|Studiervirinae|Kayfunavirus|Escherichia virus PE3-1	S1	1498170	Viruses	Escherichia phage PE3-1	0	0	0	0	0	0	0	0	0	0	0	0	0	1	0	0	0	0	0	0	0	0	0	0	0	0	0	0	0	0	0	0	0	0	0	0	0	0	0	0	0	0	0	0	0
root|Viruses|Duplodnaviria|Heunggongvirae|Uroviricota|Caudoviricetes|Caudovirales|Autographiviridae|Studiervirinae|Kayfunavirus|Escherichia virus Ro45lw	S	2733643	Viruses	Escherichia virus Ro45lw	2	2	2	0	1	1	1	0	1	0	0	0	1	0	0	0	0	0	0	1	0	2	7	0	0	0	0	0	8	0	2	1	0	0	0	3	0	0	0	0	28	6	4	0	1
root|Viruses|Duplodnaviria|Heunggongvirae|Uroviricota|Caudoviricetes|Caudovirales|Autographiviridae|Studiervirinae|Kayfunavirus|Escherichia virus Ro45lw	S1	2498616	Viruses	Escherichia phage vB_EcoP-Ro45lw	2	2	2	0	1	1	1	0	1	0	0	0	1	0	0	0	0	0	0	1	0	2	7	0	0	0	0	0	8	0	2	1	0	0	0	3	0	0	0	0	28	6	4	0	1
root|Viruses|Duplodnaviria|Heunggongvirae|Uroviricota|Caudoviricetes|Caudovirales|Autographiviridae|Studiervirinae|Kayfunavirus|Escherichia virus Vec13	S	2282173	Viruses	Escherichia virus Vec13	0	0	0	0	0	1	0	0	0	0	0	0	0	0	0	0	0	0	0	0	0	0	0	0	0	0	0	0	0	0	0	0	0	0	0	0	0	0	0	0	0	0	0	0	0
root|Viruses|Duplodnaviria|Heunggongvirae|Uroviricota|Caudoviricetes|Caudovirales|Autographiviridae|Studiervirinae|Kayfunavirus|Escherichia virus ZG49	S	2733646	Viruses	Escherichia virus ZG49	0	0	0	0	0	0	0	0	0	0	1	0	0	0	0	0	0	0	0	0	0	0	0	0	0	0	0	0	0	0	0	0	0	0	0	0	0	0	0	0	0	0	0	0	0
root|Viruses|Duplodnaviria|Heunggongvirae|Uroviricota|Caudoviricetes|Caudovirales|Autographiviridae|Studiervirinae|Kayfunavirus|Escherichia virus ZG49	S1	1897641	Viruses	Escherichia phage ZG49	0	0	0	0	0	0	0	0	0	0	1	0	0	0	0	0	0	0	0	0	0	0	0	0	0	0	0	0	0	0	0	0	0	0	0	0	0	0	0	0	0	0	0	0	0
root|Viruses|Duplodnaviria|Heunggongvirae|Uroviricota|Caudoviricetes|Caudovirales|Autographiviridae|Studiervirinae|Kayfunavirus|Shigella virus SFPH2	S	2733647	Viruses	Shigella virus SFPH2	0	0	0	0	0	0	0	0	0	0	0	1	0	0	0	0	0	0	0	0	0	0	0	0	0	0	0	0	0	0	0	0	0	0	0	0	0	0	0	0	0	0	0	0	0
root|Viruses|Duplodnaviria|Heunggongvirae|Uroviricota|Caudoviricetes|Caudovirales|Autographiviridae|Studiervirinae|Kayfunavirus|Shigella virus SFPH2	S1	2269380	Viruses	Shigella phage SFPH2	0	0	0	0	0	0	0	0	0	0	0	1	0	0	0	0	0	0	0	0	0	0	0	0	0	0	0	0	0	0	0	0	0	0	0	0	0	0	0	0	0	0	0	0	0
root|Viruses|Duplodnaviria|Heunggongvirae|Uroviricota|Caudoviricetes|Caudovirales|Autographiviridae|Studiervirinae|Minipunavirus	G	2732687	Viruses	Minipunavirus	0	0	0	0	0	2	0	0	0	0	0	0	0	0	2	0	0	1	0	0	0	0	0	0	0	0	0	0	0	0	0	0	0	0	0	0	0	0	0	0	0	0	0	0	0
root|Viruses|Duplodnaviria|Heunggongvirae|Uroviricota|Caudoviricetes|Caudovirales|Autographiviridae|Studiervirinae|Minipunavirus|Morganella virus MP2	S	2733649	Viruses	Morganella virus MP2	0	0	0	0	0	0	0	0	0	0	0	0	0	0	2	0	0	0	0	0	0	0	0	0	0	0	0	0	0	0	0	0	0	0	0	0	0	0	0	0	0	0	0	0	0
root|Viruses|Duplodnaviria|Heunggongvirae|Uroviricota|Caudoviricetes|Caudovirales|Autographiviridae|Studiervirinae|Minipunavirus|Morganella virus MP2	S1	1852627	Viruses	Morganella phage vB_MmoP_MP2	0	0	0	0	0	0	0	0	0	0	0	0	0	0	2	0	0	0	0	0	0	0	0	0	0	0	0	0	0	0	0	0	0	0	0	0	0	0	0	0	0	0	0	0	0
root|Viruses|Duplodnaviria|Heunggongvirae|Uroviricota|Caudoviricetes|Caudovirales|Autographiviridae|Studiervirinae|Minipunavirus|Morganella virus MmP1	S	2733648	Viruses	Morganella virus MmP1	0	0	0	0	0	2	0	0	0	0	0	0	0	0	0	0	0	1	0	0	0	0	0	0	0	0	0	0	0	0	0	0	0	0	0	0	0	0	0	0	0	0	0	0	0
root|Viruses|Duplodnaviria|Heunggongvirae|Uroviricota|Caudoviricetes|Caudovirales|Autographiviridae|Studiervirinae|Minipunavirus|Morganella virus MmP1	S1	526118	Viruses	Morganella phage MmP1	0	0	0	0	0	2	0	0	0	0	0	0	0	0	0	0	0	1	0	0	0	0	0	0	0	0	0	0	0	0	0	0	0	0	0	0	0	0	0	0	0	0	0	0	0
root|Viruses|Duplodnaviria|Heunggongvirae|Uroviricota|Caudoviricetes|Caudovirales|Autographiviridae|Studiervirinae|Ningirsuvirus	G	2732688	Viruses	Ningirsuvirus	0	0	0	0	0	0	0	0	0	1	0	0	0	0	0	0	0	0	0	0	0	0	0	0	0	0	0	0	0	0	0	0	0	0	0	0	0	0	0	0	0	0	0	0	0
root|Viruses|Duplodnaviria|Heunggongvirae|Uroviricota|Caudoviricetes|Caudovirales|Autographiviridae|Studiervirinae|Ningirsuvirus|Dickeya virus Ninurta	S	2733651	Viruses	Dickeya virus Ninurta	0	0	0	0	0	0	0	0	0	1	0	0	0	0	0	0	0	0	0	0	0	0	0	0	0	0	0	0	0	0	0	0	0	0	0	0	0	0	0	0	0	0	0	0	0
root|Viruses|Duplodnaviria|Heunggongvirae|Uroviricota|Caudoviricetes|Caudovirales|Autographiviridae|Studiervirinae|Ningirsuvirus|Dickeya virus Ninurta	S1	2163631	Viruses	Dickeya phage Ninurta	0	0	0	0	0	0	0	0	0	1	0	0	0	0	0	0	0	0	0	0	0	0	0	0	0	0	0	0	0	0	0	0	0	0	0	0	0	0	0	0	0	0	0	0	0
root|Viruses|Duplodnaviria|Heunggongvirae|Uroviricota|Caudoviricetes|Caudovirales|Autographiviridae|Studiervirinae|Pektosvirus	G	2732689	Viruses	Pektosvirus	0	0	0	0	0	0	1	0	0	0	0	0	0	0	0	0	0	1	0	0	0	0	1	0	0	0	0	0	0	0	0	0	0	0	0	0	0	0	0	0	0	0	0	0	0
root|Viruses|Duplodnaviria|Heunggongvirae|Uroviricota|Caudoviricetes|Caudovirales|Autographiviridae|Studiervirinae|Phutvirus	G	2732690	Viruses	Phutvirus	1	0	1	0	0	0	0	0	0	0	0	0	0	0	0	0	0	0	0	0	0	0	0	0	0	0	1	0	0	0	0	0	0	0	0	0	0	0	0	0	0	0	0	0	0
root|Viruses|Duplodnaviria|Heunggongvirae|Uroviricota|Caudoviricetes|Caudovirales|Autographiviridae|Studiervirinae|Phutvirus|Pseudomonas virus PPpW4	S	2733655	Viruses	Pseudomonas virus PPpW4	1	0	1	0	0	0	0	0	0	0	0	0	0	0	0	0	0	0	0	0	0	0	0	0	0	0	1	0	0	0	0	0	0	0	0	0	0	0	0	0	0	0	0	0	0
root|Viruses|Duplodnaviria|Heunggongvirae|Uroviricota|Caudoviricetes|Caudovirales|Autographiviridae|Studiervirinae|Phutvirus|Pseudomonas virus PPpW4	S1	1279083	Viruses	Pseudomonas phage PPpW-4	1	0	1	0	0	0	0	0	0	0	0	0	0	0	0	0	0	0	0	0	0	0	0	0	0	0	1	0	0	0	0	0	0	0	0	0	0	0	0	0	0	0	0	0	0
root|Viruses|Duplodnaviria|Heunggongvirae|Uroviricota|Caudoviricetes|Caudovirales|Autographiviridae|Studiervirinae|Pifdecavirus	G	2732691	Viruses	Pifdecavirus	0	3	0	0	2	0	1	0	1	2	3	1	2	2	0	0	0	0	0	1	0	0	0	0	0	1	0	1	0	0	0	0	0	0	0	0	2	0	0	0	0	0	0	0	1
root|Viruses|Duplodnaviria|Heunggongvirae|Uroviricota|Caudoviricetes|Caudovirales|Autographiviridae|Studiervirinae|Pifdecavirus|Pseudomonas virus IBBPF7A	S	2733657	Viruses	Pseudomonas virus IBBPF7A	0	0	0	0	0	0	0	0	0	0	0	1	0	0	0	0	0	0	0	1	0	0	0	0	0	0	0	0	0	0	0	0	0	0	0	0	0	0	0	0	0	0	0	0	0
root|Viruses|Duplodnaviria|Heunggongvirae|Uroviricota|Caudoviricetes|Caudovirales|Autographiviridae|Studiervirinae|Pifdecavirus|Pseudomonas virus IBBPF7A	S1	942165	Viruses	Pseudomonas phage phiIBB-PF7A	0	0	0	0	0	0	0	0	0	0	0	1	0	0	0	0	0	0	0	1	0	0	0	0	0	0	0	0	0	0	0	0	0	0	0	0	0	0	0	0	0	0	0	0	0
root|Viruses|Duplodnaviria|Heunggongvirae|Uroviricota|Caudoviricetes|Caudovirales|Autographiviridae|Studiervirinae|Pifdecavirus|Pseudomonas virus PFP1	S	2733659	Viruses	Pseudomonas virus PFP1	0	0	0	0	0	0	0	0	1	0	3	0	0	0	0	0	0	0	0	0	0	0	0	0	0	1	0	0	0	0	0	0	0	0	0	0	0	0	0	0	0	0	0	0	0
root|Viruses|Duplodnaviria|Heunggongvirae|Uroviricota|Caudoviricetes|Caudovirales|Autographiviridae|Studiervirinae|Pifdecavirus|Pseudomonas virus PFP1	S1	2201462	Viruses	Pseudomonas phage PFP1	0	0	0	0	0	0	0	0	1	0	3	0	0	0	0	0	0	0	0	0	0	0	0	0	0	1	0	0	0	0	0	0	0	0	0	0	0	0	0	0	0	0	0	0	0
root|Viruses|Duplodnaviria|Heunggongvirae|Uroviricota|Caudoviricetes|Caudovirales|Autographiviridae|Studiervirinae|Pifdecavirus|Pseudomonas virus Pf10	S	2733658	Viruses	Pseudomonas virus Pf10	0	1	0	0	2	0	1	0	0	2	0	0	0	2	0	0	0	0	0	0	0	0	0	0	0	0	0	0	0	0	0	0	0	0	0	0	2	0	0	0	0	0	0	0	1
root|Viruses|Duplodnaviria|Heunggongvirae|Uroviricota|Caudoviricetes|Caudovirales|Autographiviridae|Studiervirinae|Pifdecavirus|Pseudomonas virus Pf10	S1	1562076	Viruses	Pseudomonas phage Pf-10	0	1	0	0	2	0	1	0	0	2	0	0	0	2	0	0	0	0	0	0	0	0	0	0	0	0	0	0	0	0	0	0	0	0	0	0	2	0	0	0	0	0	0	0	1
root|Viruses|Duplodnaviria|Heunggongvirae|Uroviricota|Caudoviricetes|Caudovirales|Autographiviridae|Studiervirinae|Pifdecavirus|Pseudomonas virus PhiS1	S	2733660	Viruses	Pseudomonas virus PhiS1	0	0	0	0	0	0	0	0	0	0	0	0	0	0	0	0	0	0	0	0	0	0	0	0	0	0	0	1	0	0	0	0	0	0	0	0	0	0	0	0	0	0	0	0	0
root|Viruses|Duplodnaviria|Heunggongvirae|Uroviricota|Caudoviricetes|Caudovirales|Autographiviridae|Studiervirinae|Pifdecavirus|Pseudomonas virus PhiS1	S1	1204538	Viruses	Pseudomonas phage Phi-S1	0	0	0	0	0	0	0	0	0	0	0	0	0	0	0	0	0	0	0	0	0	0	0	0	0	0	0	1	0	0	0	0	0	0	0	0	0	0	0	0	0	0	0	0	0
root|Viruses|Duplodnaviria|Heunggongvirae|Uroviricota|Caudoviricetes|Caudovirales|Autographiviridae|Studiervirinae|Pijolavirus	G	2732692	Viruses	Pijolavirus	0	0	0	0	0	0	0	2	0	0	0	0	0	0	0	0	0	0	0	0	0	0	0	0	0	0	0	0	0	0	0	0	0	0	0	0	0	0	0	0	0	0	0	0	0
root|Viruses|Duplodnaviria|Heunggongvirae|Uroviricota|Caudoviricetes|Caudovirales|Autographiviridae|Studiervirinae|Pijolavirus|Pseudomonas virus PspYZU08	S	2733662	Viruses	Pseudomonas virus PspYZU08	0	0	0	0	0	0	0	2	0	0	0	0	0	0	0	0	0	0	0	0	0	0	0	0	0	0	0	0	0	0	0	0	0	0	0	0	0	0	0	0	0	0	0	0	0
root|Viruses|Duplodnaviria|Heunggongvirae|Uroviricota|Caudoviricetes|Caudovirales|Autographiviridae|Studiervirinae|Pijolavirus|Pseudomonas virus PspYZU08	S1	1983557	Viruses	Pseudomonas phage PspYZU08	0	0	0	0	0	0	0	2	0	0	0	0	0	0	0	0	0	0	0	0	0	0	0	0	0	0	0	0	0	0	0	0	0	0	0	0	0	0	0	0	0	0	0	0	0
root|Viruses|Duplodnaviria|Heunggongvirae|Uroviricota|Caudoviricetes|Caudovirales|Autographiviridae|Studiervirinae|Przondovirus	G	1985720	Viruses	Przondovirus	1	0	2	0	0	2	2	0	1	1	3	2	0	3	0	0	0	1	0	2	0	0	1	6	0	1	0	1	0	2	0	2	0	1	0	0	2	0	0	1	0	2	0	0	0
root|Viruses|Duplodnaviria|Heunggongvirae|Uroviricota|Caudoviricetes|Caudovirales|Autographiviridae|Studiervirinae|Przondovirus|Escherichia virus K30	S	1985722	Viruses	Escherichia virus K30	0	0	0	0	0	0	0	0	0	0	0	0	0	0	0	0	0	0	0	0	0	0	0	0	0	0	0	0	0	0	0	0	0	1	0	0	0	0	0	0	0	0	0	0	0
root|Viruses|Duplodnaviria|Heunggongvirae|Uroviricota|Caudoviricetes|Caudovirales|Autographiviridae|Studiervirinae|Przondovirus|Escherichia virus K30	S1	1041524	Viruses	Escherichia phage K30	0	0	0	0	0	0	0	0	0	0	0	0	0	0	0	0	0	0	0	0	0	0	0	0	0	0	0	0	0	0	0	0	0	1	0	0	0	0	0	0	0	0	0	0	0
root|Viruses|Duplodnaviria|Heunggongvirae|Uroviricota|Caudoviricetes|Caudovirales|Autographiviridae|Studiervirinae|Przondovirus|Klebsiella virus Henu1	S	2733665	Viruses	Klebsiella virus Henu1	0	0	0	0	0	0	0	0	1	0	0	0	0	0	0	0	0	0	0	0	0	0	0	0	0	0	0	0	0	0	0	0	0	0	0	0	0	0	0	0	0	0	0	0	0
root|Viruses|Duplodnaviria|Heunggongvirae|Uroviricota|Caudoviricetes|Caudovirales|Autographiviridae|Studiervirinae|Przondovirus|Klebsiella virus Henu1	S1	2492437	Viruses	Klebsiella phage Henu1	0	0	0	0	0	0	0	0	1	0	0	0	0	0	0	0	0	0	0	0	0	0	0	0	0	0	0	0	0	0	0	0	0	0	0	0	0	0	0	0	0	0	0	0	0
root|Viruses|Duplodnaviria|Heunggongvirae|Uroviricota|Caudoviricetes|Caudovirales|Autographiviridae|Studiervirinae|Przondovirus|Klebsiella virus IME321	S	2733668	Viruses	Klebsiella virus IME321	0	0	0	0	0	0	0	0	0	0	1	0	0	2	0	0	0	0	0	0	0	0	0	0	0	0	0	0	0	1	0	0	0	0	0	0	1	0	0	0	0	0	0	0	0
root|Viruses|Duplodnaviria|Heunggongvirae|Uroviricota|Caudoviricetes|Caudovirales|Autographiviridae|Studiervirinae|Przondovirus|Klebsiella virus IME321	S1	2268396	Viruses	Klebsiella phage vB_KpnP_IME321	0	0	0	0	0	0	0	0	0	0	1	0	0	2	0	0	0	0	0	0	0	0	0	0	0	0	0	0	0	1	0	0	0	0	0	0	1	0	0	0	0	0	0	0	0
root|Viruses|Duplodnaviria|Heunggongvirae|Uroviricota|Caudoviricetes|Caudovirales|Autographiviridae|Studiervirinae|Przondovirus|Klebsiella virus K5-2	S	2733669	Viruses	Klebsiella virus K5-2	0	0	0	0	0	0	0	0	0	0	0	0	0	0	0	0	0	0	0	0	0	0	0	2	0	0	0	0	0	0	0	0	0	0	0	0	0	0	0	0	0	1	0	0	0
root|Viruses|Duplodnaviria|Heunggongvirae|Uroviricota|Caudoviricetes|Caudovirales|Autographiviridae|Studiervirinae|Przondovirus|Klebsiella virus K5-2	S1	1932361	Viruses	Klebsiella phage K5-2	0	0	0	0	0	0	0	0	0	0	0	0	0	0	0	0	0	0	0	0	0	0	0	2	0	0	0	0	0	0	0	0	0	0	0	0	0	0	0	0	0	1	0	0	0
root|Viruses|Duplodnaviria|Heunggongvirae|Uroviricota|Caudoviricetes|Caudovirales|Autographiviridae|Studiervirinae|Przondovirus|Klebsiella virus KN1-1	S	2733671	Viruses	Klebsiella virus KN1-1	0	0	0	0	0	0	0	0	0	0	0	0	0	0	0	0	0	0	0	1	0	0	0	0	0	0	0	0	0	0	0	0	0	0	0	0	0	0	0	0	0	0	0	0	0
root|Viruses|Duplodnaviria|Heunggongvirae|Uroviricota|Caudoviricetes|Caudovirales|Autographiviridae|Studiervirinae|Przondovirus|Klebsiella virus KN1-1	S1	2282629	Viruses	Klebsiella phage KN1-1	0	0	0	0	0	0	0	0	0	0	0	0	0	0	0	0	0	0	0	1	0	0	0	0	0	0	0	0	0	0	0	0	0	0	0	0	0	0	0	0	0	0	0	0	0
root|Viruses|Duplodnaviria|Heunggongvirae|Uroviricota|Caudoviricetes|Caudovirales|Autographiviridae|Studiervirinae|Przondovirus|Klebsiella virus KN3-1	S	2733672	Viruses	Klebsiella virus KN3-1	0	0	0	0	0	0	0	0	0	0	0	0	0	1	0	0	0	0	0	0	0	0	0	0	0	0	0	0	0	0	0	0	0	0	0	0	0	0	0	0	0	1	0	0	0
root|Viruses|Duplodnaviria|Heunggongvirae|Uroviricota|Caudoviricetes|Caudovirales|Autographiviridae|Studiervirinae|Przondovirus|Klebsiella virus KN3-1	S1	2282630	Viruses	Klebsiella phage KN3-1	0	0	0	0	0	0	0	0	0	0	0	0	0	1	0	0	0	0	0	0	0	0	0	0	0	0	0	0	0	0	0	0	0	0	0	0	0	0	0	0	0	1	0	0	0
root|Viruses|Duplodnaviria|Heunggongvirae|Uroviricota|Caudoviricetes|Caudovirales|Autographiviridae|Studiervirinae|Przondovirus|Klebsiella virus KP32	S	1985726	Viruses	Klebsiella virus KP32	0	0	0	0	0	0	1	0	0	1	0	0	0	0	0	0	0	0	0	1	0	0	1	4	0	0	0	0	0	1	0	0	0	0	0	0	0	0	0	1	0	0	0	0	0
root|Viruses|Duplodnaviria|Heunggongvirae|Uroviricota|Caudoviricetes|Caudovirales|Autographiviridae|Studiervirinae|Przondovirus|Klebsiella virus KP32	S1	674082	Viruses	Klebsiella phage KP32	0	0	0	0	0	0	0	0	0	1	0	0	0	0	0	0	0	0	0	0	0	0	0	0	0	0	0	0	0	0	0	0	0	0	0	0	0	0	0	0	0	0	0	0	0
root|Viruses|Duplodnaviria|Heunggongvirae|Uroviricota|Caudoviricetes|Caudovirales|Autographiviridae|Studiervirinae|Przondovirus|Klebsiella virus KpV289	S	1985727	Viruses	Klebsiella virus KpV289	0	0	0	0	0	2	1	0	0	0	1	0	0	0	0	0	0	1	0	0	0	0	0	0	0	1	0	0	0	0	0	0	0	0	0	0	0	0	0	0	0	0	0	0	0
root|Viruses|Duplodnaviria|Heunggongvirae|Uroviricota|Caudoviricetes|Caudovirales|Autographiviridae|Studiervirinae|Przondovirus|Klebsiella virus KpV289	S1	1671396	Viruses	Klebsiella phage vB_KpnP_KpV289	0	0	0	0	0	2	1	0	0	0	1	0	0	0	0	0	0	1	0	0	0	0	0	0	0	1	0	0	0	0	0	0	0	0	0	0	0	0	0	0	0	0	0	0	0
root|Viruses|Duplodnaviria|Heunggongvirae|Uroviricota|Caudoviricetes|Caudovirales|Autographiviridae|Studiervirinae|Przondovirus|Klebsiella virus KpV767	S	2733681	Viruses	Klebsiella virus KpV767	0	0	1	0	0	0	0	0	0	0	0	0	0	0	0	0	0	0	0	0	0	0	0	0	0	0	0	0	0	0	0	0	0	0	0	0	0	0	0	0	0	0	0	0	0
root|Viruses|Duplodnaviria|Heunggongvirae|Uroviricota|Caudoviricetes|Caudovirales|Autographiviridae|Studiervirinae|Przondovirus|Klebsiella virus KpV767	S1	1897430	Viruses	Klebsiella phage vB_KpnP_KpV767	0	0	1	0	0	0	0	0	0	0	0	0	0	0	0	0	0	0	0	0	0	0	0	0	0	0	0	0	0	0	0	0	0	0	0	0	0	0	0	0	0	0	0	0	0
root|Viruses|Duplodnaviria|Heunggongvirae|Uroviricota|Caudoviricetes|Caudovirales|Autographiviridae|Studiervirinae|Teetrevirus	G	2732693	Viruses	Teetrevirus	1	0	0	0	0	0	0	1	0	0	0	0	0	1	0	0	2	3	0	0	0	0	0	0	0	0	0	1	0	1	0	0	0	0	0	0	0	0	0	0	0	0	0	0	0
root|Viruses|Duplodnaviria|Heunggongvirae|Uroviricota|Caudoviricetes|Caudovirales|Autographiviridae|Studiervirinae|Teetrevirus|Citrobacter virus SH2	S	2732699	Viruses	Citrobacter virus SH2	1	0	0	0	0	0	0	0	0	0	0	0	0	0	0	0	0	0	0	0	0	0	0	0	0	0	0	0	0	0	0	0	0	0	0	0	0	0	0	0	0	0	0	0	0
root|Viruses|Duplodnaviria|Heunggongvirae|Uroviricota|Caudoviricetes|Caudovirales|Autographiviridae|Studiervirinae|Teetrevirus|Citrobacter virus SH2	S1	1805465	Viruses	Citrobacter phage SH2	1	0	0	0	0	0	0	0	0	0	0	0	0	0	0	0	0	0	0	0	0	0	0	0	0	0	0	0	0	0	0	0	0	0	0	0	0	0	0	0	0	0	0	0	0
root|Viruses|Duplodnaviria|Heunggongvirae|Uroviricota|Caudoviricetes|Caudovirales|Autographiviridae|Studiervirinae|Teetrevirus|Enterobacter virus E3	S	2732701	Viruses	Enterobacter virus E3	0	0	0	0	0	0	0	0	0	0	0	0	0	0	0	0	1	0	0	0	0	0	0	0	0	0	0	0	0	0	0	0	0	0	0	0	0	0	0	0	0	0	0	0	0
root|Viruses|Duplodnaviria|Heunggongvirae|Uroviricota|Caudoviricetes|Caudovirales|Autographiviridae|Studiervirinae|Teetrevirus|Enterobacter virus E3	S1	1636314	Viruses	Enterobacter phage E-3	0	0	0	0	0	0	0	0	0	0	0	0	0	0	0	0	1	0	0	0	0	0	0	0	0	0	0	0	0	0	0	0	0	0	0	0	0	0	0	0	0	0	0	0	0
root|Viruses|Duplodnaviria|Heunggongvirae|Uroviricota|Caudoviricetes|Caudovirales|Autographiviridae|Studiervirinae|Teetrevirus|Escherichia virus ECA2	S	2732704	Viruses	Escherichia virus ECA2	0	0	0	0	0	0	0	0	0	0	0	0	0	1	0	0	0	3	0	0	0	0	0	0	0	0	0	0	0	0	0	0	0	0	0	0	0	0	0	0	0	0	0	0	0
root|Viruses|Duplodnaviria|Heunggongvirae|Uroviricota|Caudoviricetes|Caudovirales|Autographiviridae|Studiervirinae|Teetrevirus|Escherichia virus ECA2	S1	1852630	Viruses	Escherichia phage ECA2	0	0	0	0	0	0	0	0	0	0	0	0	0	1	0	0	0	3	0	0	0	0	0	0	0	0	0	0	0	0	0	0	0	0	0	0	0	0	0	0	0	0	0	0	0
root|Viruses|Duplodnaviria|Heunggongvirae|Uroviricota|Caudoviricetes|Caudovirales|Autographiviridae|Studiervirinae|Teseptimavirus	G	110456	Viruses	Teseptimavirus	4	3	3	0	2	2	2	0	0	0	0	218	0	0	0	17	1	1	1	10	1	49	0	13	2	5	2	0	3	1	0	21	6	10	0	0	29	4	1	3	26	16	0	2	1
root|Viruses|Duplodnaviria|Heunggongvirae|Uroviricota|Caudoviricetes|Caudovirales|Autographiviridae|Studiervirinae|Teseptimavirus|Enterobacteria virus IME390	S	2733870	Viruses	Enterobacteria virus IME390	0	0	0	0	0	0	0	0	0	0	0	0	0	0	0	0	0	0	0	0	0	0	0	0	0	0	0	0	0	0	0	0	0	0	0	0	0	0	0	0	0	0	0	0	0
root|Viruses|Duplodnaviria|Heunggongvirae|Uroviricota|Caudoviricetes|Caudovirales|Autographiviridae|Studiervirinae|Teseptimavirus|Enterobacteria virus IME390	S1	2315471	Viruses	Enterobacteria phage vB_EcoP_IME390	0	0	0	0	0	0	0	0	0	0	0	0	0	0	0	0	0	0	0	0	0	0	0	0	0	0	0	0	0	0	0	0	0	0	0	0	0	0	0	0	0	0	0	0	0
root|Viruses|Duplodnaviria|Heunggongvirae|Uroviricota|Caudoviricetes|Caudovirales|Autographiviridae|Studiervirinae|Teseptimavirus|Escherichia virus 64795ec1	S	2733872	Viruses	Escherichia virus 64795ec1	2	2	0	0	1	0	0	0	0	0	0	0	0	0	0	0	0	0	0	0	0	0	0	0	0	0	0	0	0	0	0	0	0	0	0	0	0	0	0	0	0	0	0	0	0
root|Viruses|Duplodnaviria|Heunggongvirae|Uroviricota|Caudoviricetes|Caudovirales|Autographiviridae|Studiervirinae|Teseptimavirus|Escherichia virus 64795ec1	S1	1837842	Viruses	Escherichia phage 64795_ec1	2	2	0	0	1	0	0	0	0	0	0	0	0	0	0	0	0	0	0	0	0	0	0	0	0	0	0	0	0	0	0	0	0	0	0	0	0	0	0	0	0	0	0	0	0
root|Viruses|Duplodnaviria|Heunggongvirae|Uroviricota|Caudoviricetes|Caudovirales|Autographiviridae|Studiervirinae|Teseptimavirus|Escherichia virus HZP2	S	2733878	Viruses	Escherichia virus HZP2	0	0	0	0	0	0	0	0	0	0	0	3	0	0	0	0	0	0	0	0	0	0	0	0	0	0	0	0	0	0	0	0	0	0	0	0	0	0	0	0	0	0	0	0	0
root|Viruses|Duplodnaviria|Heunggongvirae|Uroviricota|Caudoviricetes|Caudovirales|Autographiviridae|Studiervirinae|Teseptimavirus|Escherichia virus HZP2	S1	2530019	Viruses	Escherichia phage HZP2	0	0	0	0	0	0	0	0	0	0	0	3	0	0	0	0	0	0	0	0	0	0	0	0	0	0	0	0	0	0	0	0	0	0	0	0	0	0	0	0	0	0	0	0	0
root|Viruses|Duplodnaviria|Heunggongvirae|Uroviricota|Caudoviricetes|Caudovirales|Autographiviridae|Studiervirinae|Teseptimavirus|Escherichia virus NCA	S	2733880	Viruses	Escherichia virus NCA	1	0	0	0	0	0	0	0	0	0	0	0	0	0	0	0	0	0	0	0	0	0	0	0	0	0	0	0	0	0	0	0	0	0	0	0	0	0	0	0	0	0	0	0	0
root|Viruses|Duplodnaviria|Heunggongvirae|Uroviricota|Caudoviricetes|Caudovirales|Autographiviridae|Studiervirinae|Teseptimavirus|Escherichia virus NCA	S1	2528528	Viruses	Phage NC-A	1	0	0	0	0	0	0	0	0	0	0	0	0	0	0	0	0	0	0	0	0	0	0	0	0	0	0	0	0	0	0	0	0	0	0	0	0	0	0	0	0	0	0	0	0
root|Viruses|Duplodnaviria|Heunggongvirae|Uroviricota|Caudoviricetes|Caudovirales|Autographiviridae|Studiervirinae|Teseptimavirus|Salmonella virus Vi06	S	2733882	Viruses	Salmonella virus Vi06	0	0	0	0	0	0	0	0	0	0	0	0	0	0	0	0	1	0	0	0	0	0	0	0	0	0	0	0	0	0	0	0	0	0	0	0	0	0	0	0	0	0	0	0	0
root|Viruses|Duplodnaviria|Heunggongvirae|Uroviricota|Caudoviricetes|Caudovirales|Autographiviridae|Studiervirinae|Teseptimavirus|Salmonella virus Vi06	S1	866889	Viruses	Salmonella phage Vi06	0	0	0	0	0	0	0	0	0	0	0	0	0	0	0	0	1	0	0	0	0	0	0	0	0	0	0	0	0	0	0	0	0	0	0	0	0	0	0	0	0	0	0	0	0
root|Viruses|Duplodnaviria|Heunggongvirae|Uroviricota|Caudoviricetes|Caudovirales|Autographiviridae|Studiervirinae|Teseptimavirus|Stenotrophomonas virus IME15	S	2733883	Viruses	Stenotrophomonas virus IME15	0	0	1	0	0	0	0	0	0	0	0	0	0	0	0	0	0	0	0	0	0	0	0	0	0	0	0	0	0	0	0	0	0	0	0	0	1	0	0	0	0	0	0	0	0
root|Viruses|Duplodnaviria|Heunggongvirae|Uroviricota|Caudoviricetes|Caudovirales|Autographiviridae|Studiervirinae|Teseptimavirus|Stenotrophomonas virus IME15	S1	1239382	Viruses	Stenotrophomonas phage IME15	0	0	1	0	0	0	0	0	0	0	0	0	0	0	0	0	0	0	0	0	0	0	0	0	0	0	0	0	0	0	0	0	0	0	0	0	1	0	0	0	0	0	0	0	0
root|Viruses|Duplodnaviria|Heunggongvirae|Uroviricota|Caudoviricetes|Caudovirales|Autographiviridae|Studiervirinae|Teseptimavirus|unclassified Teseptimavirus	G1	329157	Viruses	unclassified Teseptimavirus	0	0	2	0	0	2	2	0	0	0	0	0	0	0	0	1	0	0	0	10	1	0	0	12	0	5	1	0	1	0	0	20	6	10	0	0	23	4	0	3	0	1	0	0	0
root|Viruses|Duplodnaviria|Heunggongvirae|Uroviricota|Caudoviricetes|Caudovirales|Autographiviridae|Studiervirinae|Teseptimavirus|unclassified Teseptimavirus	S	2283033	Viruses	Dickeya phage vB_DsoP_JA10	0	0	0	0	0	0	1	0	0	0	0	0	0	0	0	1	0	0	0	0	1	0	0	0	0	0	0	0	0	0	0	0	0	0	0	0	1	0	0	0	0	0	0	0	0
root|Viruses|Duplodnaviria|Heunggongvirae|Uroviricota|Caudoviricetes|Caudovirales|Autographiviridae|Studiervirinae|Teseptimavirus|unclassified Teseptimavirus	S	329886	Viruses	Vibriophage VP4	0	0	0	0	0	0	0	0	0	0	0	0	0	0	0	0	0	0	0	0	0	0	0	0	0	0	0	0	0	0	0	0	0	0	0	0	0	0	0	0	0	1	0	0	0
root|Viruses|Duplodnaviria|Heunggongvirae|Uroviricota|Caudoviricetes|Caudovirales|Autographiviridae|Studiervirinae|Teseptimavirus|unclassified Teseptimavirus	S	344021	Viruses	Enterobacteria phage K1F	0	0	0	0	0	0	1	0	0	0	0	0	0	0	0	0	0	0	0	0	0	0	0	0	0	0	0	0	0	0	0	0	0	0	0	0	0	0	0	0	0	0	0	0	0
root|Viruses|Duplodnaviria|Heunggongvirae|Uroviricota|Caudoviricetes|Caudovirales|Autographiviridae|Studiervirinae|Teseptimavirus|unclassified Teseptimavirus	S	532075	Viruses	Enterobacteria phage EcoDS1	0	0	2	0	0	2	0	0	0	0	0	0	0	0	0	0	0	0	0	1	0	0	0	0	0	0	1	0	0	0	0	20	6	10	0	0	22	4	0	2	0	0	0	0	0
root|Viruses|Duplodnaviria|Heunggongvirae|Uroviricota|Caudoviricetes|Caudovirales|Autographiviridae|Studiervirinae|Teseptimavirus|unclassified Teseptimavirus	S	532076	Viruses	Enterobacteria phage 13a	0	0	0	0	0	0	0	0	0	0	0	0	0	0	0	0	0	0	0	0	0	0	0	0	0	0	0	0	1	0	0	0	0	0	0	0	0	0	0	0	0	0	0	0	0
root|Viruses|Duplodnaviria|Heunggongvirae|Uroviricota|Caudoviricetes|Caudovirales|Autographiviridae|Studiervirinae|Teseptimavirus|unclassified Teseptimavirus	S	669008	Viruses	Enterobacteria phage 285P	0	0	0	0	0	0	0	0	0	0	0	0	0	0	0	0	0	0	0	9	0	0	0	12	0	5	0	0	0	0	0	0	0	0	0	0	0	0	0	1	0	0	0	0	0
root|Viruses|Duplodnaviria|Heunggongvirae|Uroviricota|Caudoviricetes|Caudovirales|Autographiviridae|Studiervirinae|Troedvirus	G	2732694	Viruses	Troedvirus	0	0	0	1	0	0	1	0	0	0	0	0	0	0	0	0	0	0	0	0	0	0	0	0	0	0	1	0	0	0	0	0	0	0	0	0	0	0	0	0	0	0	0	0	0
root|Viruses|Duplodnaviria|Heunggongvirae|Uroviricota|Caudoviricetes|Caudovirales|Autographiviridae|Studiervirinae|Troedvirus|Pseudomonas virus Phi15	S	2733886	Viruses	Pseudomonas virus Phi15	0	0	0	1	0	0	1	0	0	0	0	0	0	0	0	0	0	0	0	0	0	0	0	0	0	0	1	0	0	0	0	0	0	0	0	0	0	0	0	0	0	0	0	0	0
root|Viruses|Duplodnaviria|Heunggongvirae|Uroviricota|Caudoviricetes|Caudovirales|Autographiviridae|Studiervirinae|Troedvirus|Pseudomonas virus Phi15	S1	988656	Viruses	Pseudomonas phage phi15	0	0	0	1	0	0	1	0	0	0	0	0	0	0	0	0	0	0	0	0	0	0	0	0	0	0	1	0	0	0	0	0	0	0	0	0	0	0	0	0	0	0	0	0	0
root|Viruses|Duplodnaviria|Heunggongvirae|Uroviricota|Caudoviricetes|Caudovirales|Autographiviridae|Studiervirinae|unclassified Studiervirinae	F2	2756217	Viruses	unclassified Studiervirinae	1	0	0	0	0	0	0	0	0	0	0	0	0	0	0	0	0	0	0	0	0	0	0	0	0	0	0	0	0	0	0	0	0	0	0	0	0	0	0	0	0	0	0	0	0
root|Viruses|Duplodnaviria|Heunggongvirae|Uroviricota|Caudoviricetes|Caudovirales|Autographiviridae|Studiervirinae|unclassified Studiervirinae|Pasteurella phage PHB02	F3	2005054	Viruses	Pasteurella phage PHB02	1	0	0	0	0	0	0	0	0	0	0	0	0	0	0	0	0	0	0	0	0	0	0	0	0	0	0	0	0	0	0	0	0	0	0	0	0	0	0	0	0	0	0	0	0
root|Viruses|Duplodnaviria|Heunggongvirae|Uroviricota|Caudoviricetes|Caudovirales|Autographiviridae|Tangaroavirus	G	2731981	Viruses	Tangaroavirus	0	4	3	1	0	0	2	1	0	0	3	0	1	2	0	1	0	2	0	0	0	0	0	0	0	0	0	0	1	1	0	0	0	0	0	0	0	0	1	0	0	0	0	0	0
root|Viruses|Duplodnaviria|Heunggongvirae|Uroviricota|Caudoviricetes|Caudovirales|Autographiviridae|Tangaroavirus|Prochlorococcus virus 951510a	S	2733962	Viruses	Prochlorococcus virus 951510a	0	2	0	0	0	0	0	0	0	0	0	0	0	0	0	1	0	1	0	0	0	0	0	0	0	0	0	0	1	0	0	0	0	0	0	0	0	0	1	0	0	0	0	0	0
root|Viruses|Duplodnaviria|Heunggongvirae|Uroviricota|Caudoviricetes|Caudovirales|Autographiviridae|Tangaroavirus|Prochlorococcus virus 951510a|Cyanophage 9515-10a	S1	444875	Viruses	Cyanophage 9515-10a	0	2	0	0	0	0	0	0	0	0	0	0	0	0	0	1	0	1	0	0	0	0	0	0	0	0	0	0	1	0	0	0	0	0	0	0	0	0	1	0	0	0	0	0	0
root|Viruses|Duplodnaviria|Heunggongvirae|Uroviricota|Caudoviricetes|Caudovirales|Autographiviridae|Tangaroavirus|Prochlorococcus virus NATL2A133	S	2733963	Viruses	Prochlorococcus virus NATL2A133	0	2	1	0	0	0	1	1	0	0	1	0	1	0	0	0	0	0	0	0	0	0	0	0	0	0	0	0	0	1	0	0	0	0	0	0	0	0	0	0	0	0	0	0	0
root|Viruses|Duplodnaviria|Heunggongvirae|Uroviricota|Caudoviricetes|Caudovirales|Autographiviridae|Tangaroavirus|Prochlorococcus virus NATL2A133|Cyanophage NATL2A-133	S1	445692	Viruses	Cyanophage NATL2A-133	0	2	1	0	0	0	1	1	0	0	1	0	1	0	0	0	0	0	0	0	0	0	0	0	0	0	0	0	0	1	0	0	0	0	0	0	0	0	0	0	0	0	0	0	0
root|Viruses|Duplodnaviria|Heunggongvirae|Uroviricota|Caudoviricetes|Caudovirales|Autographiviridae|Tangaroavirus|Prochlorococcus virus PSSP10	S	2733964	Viruses	Prochlorococcus virus PSSP10	0	0	1	0	0	0	0	0	0	0	0	0	0	0	0	0	0	0	0	0	0	0	0	0	0	0	0	0	0	0	0	0	0	0	0	0	0	0	0	0	0	0	0	0	0
root|Viruses|Duplodnaviria|Heunggongvirae|Uroviricota|Caudoviricetes|Caudovirales|Autographiviridae|Tangaroavirus|Prochlorococcus virus PSSP10|Prochlorococcus phage P-SSP10	S1	885867	Viruses	Prochlorococcus phage P-SSP10	0	0	1	0	0	0	0	0	0	0	0	0	0	0	0	0	0	0	0	0	0	0	0	0	0	0	0	0	0	0	0	0	0	0	0	0	0	0	0	0	0	0	0	0	0
root|Viruses|Duplodnaviria|Heunggongvirae|Uroviricota|Caudoviricetes|Caudovirales|Autographiviridae|Tawavirus	G	2731982	Viruses	Tawavirus	0	0	0	0	0	0	1	0	0	0	0	0	0	0	0	0	0	0	0	0	0	0	0	0	0	0	0	0	0	0	0	0	0	0	0	0	0	0	0	0	0	0	0	0	0
root|Viruses|Duplodnaviria|Heunggongvirae|Uroviricota|Caudoviricetes|Caudovirales|Autographiviridae|Tawavirus|Vibrio virus JSF7	S	2733965	Viruses	Vibrio virus JSF7	0	0	0	0	0	0	1	0	0	0	0	0	0	0	0	0	0	0	0	0	0	0	0	0	0	0	0	0	0	0	0	0	0	0	0	0	0	0	0	0	0	0	0	0	0
root|Viruses|Duplodnaviria|Heunggongvirae|Uroviricota|Caudoviricetes|Caudovirales|Autographiviridae|Tawavirus|Vibrio virus JSF7|Vibrio phage JSF7	S1	1292086	Viruses	Vibrio phage JSF7	0	0	0	0	0	0	1	0	0	0	0	0	0	0	0	0	0	0	0	0	0	0	0	0	0	0	0	0	0	0	0	0	0	0	0	0	0	0	0	0	0	0	0	0	0
root|Viruses|Duplodnaviria|Heunggongvirae|Uroviricota|Caudoviricetes|Caudovirales|Autographiviridae|Tiamatvirus	G	2731983	Viruses	Tiamatvirus	1	0	0	0	2	0	2	1	1	0	0	0	0	1	0	0	0	0	0	0	0	0	0	1	0	0	0	1	1	0	0	0	0	0	0	0	2	0	0	0	0	0	0	0	0
root|Viruses|Duplodnaviria|Heunggongvirae|Uroviricota|Caudoviricetes|Caudovirales|Autographiviridae|Tiamatvirus|Prochlorococcus virus PSSP7	S	268748	Viruses	Prochlorococcus virus PSSP7	1	0	0	0	2	0	2	1	1	0	0	0	0	1	0	0	0	0	0	0	0	0	0	1	0	0	0	1	1	0	0	0	0	0	0	0	2	0	0	0	0	0	0	0	0
root|Viruses|Duplodnaviria|Heunggongvirae|Uroviricota|Caudoviricetes|Caudovirales|Autographiviridae|Tiilvirus	G	2731984	Viruses	Tiilvirus	2	2	4	1	1	1	5	0	4	0	0	1	0	2	0	0	0	0	0	0	0	0	1	1	0	0	0	0	0	2	0	0	0	0	0	0	0	0	0	0	0	0	0	0	0
root|Viruses|Duplodnaviria|Heunggongvirae|Uroviricota|Caudoviricetes|Caudovirales|Autographiviridae|Tiilvirus|Synechococcus virus P60	S	151528	Viruses	Synechococcus virus P60	2	2	4	1	1	1	5	0	4	0	0	1	0	2	0	0	0	0	0	0	0	0	1	1	0	0	0	0	0	2	0	0	0	0	0	0	0	0	0	0	0	0	0	0	0
root|Viruses|Duplodnaviria|Heunggongvirae|Uroviricota|Caudoviricetes|Caudovirales|Autographiviridae|Tritonvirus	G	2731985	Viruses	Tritonvirus	0	0	0	0	0	0	1	0	0	1	0	0	0	0	0	0	1	1	0	0	0	0	0	0	0	0	0	0	0	0	0	0	0	0	0	0	1	0	0	0	0	0	0	0	0
root|Viruses|Duplodnaviria|Heunggongvirae|Uroviricota|Caudoviricetes|Caudovirales|Autographiviridae|Tritonvirus|Synechococcus virus PSSP2	S	2733967	Viruses	Synechococcus virus PSSP2	0	0	0	0	0	0	1	0	0	0	0	0	0	0	0	0	0	0	0	0	0	0	0	0	0	0	0	0	0	0	0	0	0	0	0	0	0	0	0	0	0	0	0	0	0
root|Viruses|Duplodnaviria|Heunggongvirae|Uroviricota|Caudoviricetes|Caudovirales|Autographiviridae|Tritonvirus|Synechococcus virus PSSP2|Cyanophage P-SSP2	S1	444876	Viruses	Cyanophage P-SSP2	0	0	0	0	0	0	1	0	0	0	0	0	0	0	0	0	0	0	0	0	0	0	0	0	0	0	0	0	0	0	0	0	0	0	0	0	0	0	0	0	0	0	0	0	0
root|Viruses|Duplodnaviria|Heunggongvirae|Uroviricota|Caudoviricetes|Caudovirales|Autographiviridae|Voetvirus	G	2731986	Viruses	Voetvirus	0	0	0	0	0	0	0	0	0	0	0	0	0	0	0	0	0	0	0	0	0	0	0	0	0	0	0	0	0	0	0	0	0	0	0	0	0	0	0	0	0	0	0	0	0
root|Viruses|Duplodnaviria|Heunggongvirae|Uroviricota|Caudoviricetes|Caudovirales|Autographiviridae|Voetvirus|Synechococcus virus Syn5	S	438482	Viruses	Synechococcus virus Syn5	0	0	0	0	0	0	0	0	0	0	0	0	0	0	0	0	0	0	0	0	0	0	0	0	0	0	0	0	0	0	0	0	0	0	0	0	0	0	0	0	0	0	0	0	0
root|Viruses|Duplodnaviria|Heunggongvirae|Uroviricota|Caudoviricetes|Caudovirales|Autographiviridae|Votkovvirus	G	2731987	Viruses	Votkovvirus	0	0	1	0	0	1	2	0	1	0	0	0	0	0	0	0	0	0	0	0	0	0	0	0	0	0	0	0	1	0	0	0	0	0	1	0	0	0	0	0	0	0	0	0	0
root|Viruses|Duplodnaviria|Heunggongvirae|Uroviricota|Caudoviricetes|Caudovirales|Autographiviridae|Votkovvirus|Votkovvirus S28C10	S	2733968	Viruses	Votkovvirus S28C10	0	0	1	0	0	1	2	0	1	0	0	0	0	0	0	0	0	0	0	0	0	0	0	0	0	0	0	0	1	0	0	0	0	0	1	0	0	0	0	0	0	0	0	0	0
root|Viruses|Duplodnaviria|Heunggongvirae|Uroviricota|Caudoviricetes|Caudovirales|Autographiviridae|Votkovvirus|Votkovvirus S28C10|uncultured phage_MedDCM-OCT-S28-C10	S1	2741077	Viruses	uncultured phage_MedDCM-OCT-S28-C10	0	0	1	0	0	1	2	0	1	0	0	0	0	0	0	0	0	0	0	0	0	0	0	0	0	0	0	0	1	0	0	0	0	0	1	0	0	0	0	0	0	0	0	0	0
root|Viruses|Duplodnaviria|Heunggongvirae|Uroviricota|Caudoviricetes|Caudovirales|Autographiviridae|Waewaevirus	G	2731988	Viruses	Waewaevirus	0	0	0	1	0	1	0	0	0	0	2	0	2	0	0	0	0	0	0	0	0	1	0	0	0	0	0	0	0	0	0	0	0	0	0	0	0	0	0	0	0	0	0	0	0
root|Viruses|Duplodnaviria|Heunggongvirae|Uroviricota|Caudoviricetes|Caudovirales|Autographiviridae|Waewaevirus|Pantoea virus Limezero	S	1985730	Viruses	Pantoea virus Limezero	0	0	0	1	0	1	0	0	0	0	2	0	2	0	0	0	0	0	0	0	0	1	0	0	0	0	0	0	0	0	0	0	0	0	0	0	0	0	0	0	0	0	0	0	0
root|Viruses|Duplodnaviria|Heunggongvirae|Uroviricota|Caudoviricetes|Caudovirales|Autographiviridae|Waewaevirus|Pantoea virus Limezero|Pantoea phage LIMEzero	S1	943335	Viruses	Pantoea phage LIMEzero	0	0	0	1	0	1	0	0	0	0	2	0	2	0	0	0	0	0	0	0	0	1	0	0	0	0	0	0	0	0	0	0	0	0	0	0	0	0	0	0	0	0	0	0	0
root|Viruses|Duplodnaviria|Heunggongvirae|Uroviricota|Caudoviricetes|Caudovirales|Autographiviridae|environmental samples	F1	2731991	Viruses	environmental samples	0	1	0	0	0	0	1	0	0	0	0	0	0	0	0	0	0	0	0	0	0	1	0	0	0	0	0	0	0	0	0	0	0	0	0	0	1	0	0	0	0	0	0	0	0
root|Viruses|Duplodnaviria|Heunggongvirae|Uroviricota|Caudoviricetes|Caudovirales|Autographiviridae|environmental samples|uncultured phage MedDCM-OCT-S05-C243	S	743558	Viruses	uncultured phage MedDCM-OCT-S05-C243	0	1	0	0	0	0	0	0	0	0	0	0	0	0	0	0	0	0	0	0	0	0	0	0	0	0	0	0	0	0	0	0	0	0	0	0	0	0	0	0	0	0	0	0	0
root|Viruses|Duplodnaviria|Heunggongvirae|Uroviricota|Caudoviricetes|Caudovirales|Autographiviridae|environmental samples|uncultured phage MedDCM-OCT-S05-C849	S	743565	Viruses	uncultured phage MedDCM-OCT-S05-C849	0	0	0	0	0	0	0	0	0	0	0	0	0	0	0	0	0	0	0	0	0	0	0	0	0	0	0	0	0	0	0	0	0	0	0	0	1	0	0	0	0	0	0	0	0
root|Viruses|Duplodnaviria|Heunggongvirae|Uroviricota|Caudoviricetes|Caudovirales|Autographiviridae|environmental samples|uncultured phage MedDCM-OCT-S08-C159	S	743571	Viruses	uncultured phage MedDCM-OCT-S08-C159	0	0	0	0	0	0	1	0	0	0	0	0	0	0	0	0	0	0	0	0	0	1	0	0	0	0	0	0	0	0	0	0	0	0	0	0	0	0	0	0	0	0	0	0	0
root|Viruses|Duplodnaviria|Heunggongvirae|Uroviricota|Caudoviricetes|Caudovirales|Autographiviridae|unclassified Autographiviridae	F1	2731990	Viruses	unclassified Autographiviridae	0	0	0	0	1	0	0	0	0	0	0	0	0	0	0	0	0	0	1	4	0	0	8	0	0	0	0	0	0	0	0	0	0	0	0	0	0	0	0	26	0	0	1	0	0
root|Viruses|Duplodnaviria|Heunggongvirae|Uroviricota|Caudoviricetes|Caudovirales|Autographiviridae|unclassified Autographiviridae|Enterobacteria phage J8-65	S	1536597	Viruses	Enterobacteria phage J8-65	0	0	0	0	0	0	0	0	0	0	0	0	0	0	0	0	0	0	0	0	0	0	0	0	0	0	0	0	0	0	0	0	0	0	0	0	0	0	0	0	0	0	1	0	0
root|Viruses|Duplodnaviria|Heunggongvirae|Uroviricota|Caudoviricetes|Caudovirales|Autographiviridae|unclassified Autographiviridae|Synechococcus phage S-CBP1	S	1273711	Viruses	Synechococcus phage S-CBP1	0	0	0	0	1	0	0	0	0	0	0	0	0	0	0	0	0	0	1	4	0	0	8	0	0	0	0	0	0	0	0	0	0	0	0	0	0	0	0	26	0	0	0	0	0
root|Viruses|Duplodnaviria|Heunggongvirae|Uroviricota|Caudoviricetes|Caudovirales|Chaseviridae	F	2731689	Viruses	Chaseviridae	2	12	1	3	4	0	3	3	2	2	11	5	3	4	1	0	2	3	3	0	0	0	1	0	0	1	9	2	3	5	3	1	0	0	0	0	0	0	0	0	0	3	0	1	1
root|Viruses|Duplodnaviria|Heunggongvirae|Uroviricota|Caudoviricetes|Caudovirales|Chaseviridae|Carltongylesvirus	G	2732960	Viruses	Carltongylesvirus	0	3	0	1	1	0	0	1	0	0	0	0	1	1	0	0	0	1	0	0	0	0	0	0	0	0	0	1	0	0	0	0	0	0	0	0	0	0	0	0	0	0	0	0	0
root|Viruses|Duplodnaviria|Heunggongvirae|Uroviricota|Caudoviricetes|Caudovirales|Chaseviridae|Carltongylesvirus|unclassified Carltongylesvirus	G1	2746223	Viruses	unclassified Carltongylesvirus	0	0	0	1	0	0	0	0	0	0	0	0	1	0	0	0	0	1	0	0	0	0	0	0	0	0	0	1	0	0	0	0	0	0	0	0	0	0	0	0	0	0	0	0	0
root|Viruses|Duplodnaviria|Heunggongvirae|Uroviricota|Caudoviricetes|Caudovirales|Chaseviridae|Carltongylesvirus|unclassified Carltongylesvirus|Enterobacteria phage phiEcoM-GJ1	S	451705	Viruses	Enterobacteria phage phiEcoM-GJ1	0	0	0	1	0	0	0	0	0	0	0	0	0	0	0	0	0	1	0	0	0	0	0	0	0	0	0	0	0	0	0	0	0	0	0	0	0	0	0	0	0	0	0	0	0
root|Viruses|Duplodnaviria|Heunggongvirae|Uroviricota|Caudoviricetes|Caudovirales|Chaseviridae|Carltongylesvirus|unclassified Carltongylesvirus|Escherichia phage Mangalitsa	S	2589658	Viruses	Escherichia phage Mangalitsa	0	0	0	0	0	0	0	0	0	0	0	0	0	0	0	0	0	0	0	0	0	0	0	0	0	0	0	1	0	0	0	0	0	0	0	0	0	0	0	0	0	0	0	0	0
root|Viruses|Duplodnaviria|Heunggongvirae|Uroviricota|Caudoviricetes|Caudovirales|Chaseviridae|Carltongylesvirus|unclassified Carltongylesvirus|Escherichia phage flopper	S	2696397	Viruses	Escherichia phage flopper	0	0	0	0	0	0	0	0	0	0	0	0	1	0	0	0	0	0	0	0	0	0	0	0	0	0	0	0	0	0	0	0	0	0	0	0	0	0	0	0	0	0	0	0	0
root|Viruses|Duplodnaviria|Heunggongvirae|Uroviricota|Caudoviricetes|Caudovirales|Chaseviridae|Faunusvirus	G	2732961	Viruses	Faunusvirus	0	0	0	0	0	0	0	0	0	0	1	0	0	0	0	0	0	0	0	0	0	0	0	0	0	0	0	0	1	0	0	0	0	0	0	0	0	0	0	0	0	0	0	0	1
root|Viruses|Duplodnaviria|Heunggongvirae|Uroviricota|Caudoviricetes|Caudovirales|Chaseviridae|Faunusvirus|Erwinia virus Faunus	S	2733973	Viruses	Erwinia virus Faunus	0	0	0	0	0	0	0	0	0	0	1	0	0	0	0	0	0	0	0	0	0	0	0	0	0	0	0	0	1	0	0	0	0	0	0	0	0	0	0	0	0	0	0	0	1
root|Viruses|Duplodnaviria|Heunggongvirae|Uroviricota|Caudoviricetes|Caudovirales|Chaseviridae|Faunusvirus|Erwinia virus Faunus|Erwinia phage Faunus	S1	2182346	Viruses	Erwinia phage Faunus	0	0	0	0	0	0	0	0	0	0	1	0	0	0	0	0	0	0	0	0	0	0	0	0	0	0	0	0	1	0	0	0	0	0	0	0	0	0	0	0	0	0	0	0	1
root|Viruses|Duplodnaviria|Heunggongvirae|Uroviricota|Caudoviricetes|Caudovirales|Chaseviridae|Loessnervirus	G	2732962	Viruses	Loessnervirus	0	4	0	1	1	0	0	1	0	0	2	1	0	3	0	0	0	0	2	0	0	0	0	0	0	1	1	0	0	0	2	0	0	0	0	0	0	0	0	0	0	2	0	0	0
root|Viruses|Duplodnaviria|Heunggongvirae|Uroviricota|Caudoviricetes|Caudovirales|Chaseviridae|Loessnervirus|Erwinia virus Y2	S	2733974	Viruses	Erwinia virus Y2	0	0	0	1	0	0	0	0	0	0	0	0	0	0	0	0	0	0	0	0	0	0	0	0	0	0	0	0	0	0	0	0	0	0	0	0	0	0	0	0	0	0	0	0	0
root|Viruses|Duplodnaviria|Heunggongvirae|Uroviricota|Caudoviricetes|Caudovirales|Chaseviridae|Loessnervirus|Erwinia virus Y2|Erwinia phage vB_EamM-Y2	S1	1051676	Viruses	Erwinia phage vB_EamM-Y2	0	0	0	1	0	0	0	0	0	0	0	0	0	0	0	0	0	0	0	0	0	0	0	0	0	0	0	0	0	0	0	0	0	0	0	0	0	0	0	0	0	0	0	0	0
root|Viruses|Duplodnaviria|Heunggongvirae|Uroviricota|Caudoviricetes|Caudovirales|Chaseviridae|Loessnervirus|unclassified Loessnervirus	G1	2752520	Viruses	unclassified Loessnervirus	0	0	0	0	0	0	0	0	0	0	0	0	0	0	0	0	0	0	2	0	0	0	0	0	0	0	0	0	0	0	0	0	0	0	0	0	0	0	0	0	0	0	0	0	0
root|Viruses|Duplodnaviria|Heunggongvirae|Uroviricota|Caudoviricetes|Caudovirales|Chaseviridae|Loessnervirus|unclassified Loessnervirus|Pantoea phage vB_PagM_SSEM1	S	2721760	Viruses	Pantoea phage vB_PagM_SSEM1	0	0	0	0	0	0	0	0	0	0	0	0	0	0	0	0	0	0	2	0	0	0	0	0	0	0	0	0	0	0	0	0	0	0	0	0	0	0	0	0	0	0	0	0	0
root|Viruses|Duplodnaviria|Heunggongvirae|Uroviricota|Caudoviricetes|Caudovirales|Chaseviridae|Pahsextavirus	G	2732963	Viruses	Pahsextavirus	2	0	0	0	2	0	0	1	0	0	0	0	0	0	0	0	1	1	1	0	0	0	0	0	0	0	0	0	1	2	0	0	0	0	0	0	0	0	0	0	0	1	0	0	0
root|Viruses|Duplodnaviria|Heunggongvirae|Uroviricota|Caudoviricetes|Caudovirales|Chaseviridae|Pahsextavirus|Aeromonas virus pAh6C	S	2733975	Viruses	Aeromonas virus pAh6C	2	0	0	0	2	0	0	1	0	0	0	0	0	0	0	0	1	1	1	0	0	0	0	0	0	0	0	0	1	2	0	0	0	0	0	0	0	0	0	0	0	1	0	0	0
root|Viruses|Duplodnaviria|Heunggongvirae|Uroviricota|Caudoviricetes|Caudovirales|Chaseviridae|Pahsextavirus|Aeromonas virus pAh6C|Aeromonas phage pAh6-C	S1	1505227	Viruses	Aeromonas phage pAh6-C	2	0	0	0	2	0	0	1	0	0	0	0	0	0	0	0	1	1	1	0	0	0	0	0	0	0	0	0	1	2	0	0	0	0	0	0	0	0	0	0	0	1	0	0	0
root|Viruses|Duplodnaviria|Heunggongvirae|Uroviricota|Caudoviricetes|Caudovirales|Chaseviridae|Suwonvirus	G	2732964	Viruses	Suwonvirus	0	1	0	0	0	0	0	0	0	0	0	1	2	0	0	0	1	1	0	0	0	0	0	0	0	0	0	0	0	2	0	0	0	0	0	0	0	0	0	0	0	0	0	1	0
root|Viruses|Duplodnaviria|Heunggongvirae|Uroviricota|Caudoviricetes|Caudovirales|Chaseviridae|Suwonvirus|Pectobacterium virus PM1	S	2733976	Viruses	Pectobacterium virus PM1	0	0	0	0	0	0	0	0	0	0	0	0	0	0	0	0	0	0	0	0	0	0	0	0	0	0	0	0	0	0	0	0	0	0	0	0	0	0	0	0	0	0	0	1	0
root|Viruses|Duplodnaviria|Heunggongvirae|Uroviricota|Caudoviricetes|Caudovirales|Chaseviridae|Suwonvirus|Pectobacterium virus PM1|Pectobacterium phage PM1	S1	1399915	Viruses	Pectobacterium phage PM1	0	0	0	0	0	0	0	0	0	0	0	0	0	0	0	0	0	0	0	0	0	0	0	0	0	0	0	0	0	0	0	0	0	0	0	0	0	0	0	0	0	0	0	1	0
root|Viruses|Duplodnaviria|Heunggongvirae|Uroviricota|Caudoviricetes|Caudovirales|Chaseviridae|Suwonvirus|Pectobacterium virus PP101	S	2733977	Viruses	Pectobacterium virus PP101	0	1	0	0	0	0	0	0	0	0	0	0	0	0	0	0	1	1	0	0	0	0	0	0	0	0	0	0	0	0	0	0	0	0	0	0	0	0	0	0	0	0	0	0	0
root|Viruses|Duplodnaviria|Heunggongvirae|Uroviricota|Caudoviricetes|Caudovirales|Chaseviridae|Suwonvirus|Pectobacterium virus PP101|Pectobacterium phage PP101	S1	1916414	Viruses	Pectobacterium phage PP101	0	1	0	0	0	0	0	0	0	0	0	0	0	0	0	0	1	1	0	0	0	0	0	0	0	0	0	0	0	0	0	0	0	0	0	0	0	0	0	0	0	0	0	0	0
root|Viruses|Duplodnaviria|Heunggongvirae|Uroviricota|Caudoviricetes|Caudovirales|Chaseviridae|Yushanvirus	G	2732965	Viruses	Yushanvirus	0	4	1	1	0	0	3	0	2	2	8	3	0	0	1	0	0	0	0	0	0	0	1	0	0	0	8	1	1	1	1	1	0	0	0	0	0	0	0	0	0	0	0	0	0
root|Viruses|Duplodnaviria|Heunggongvirae|Uroviricota|Caudoviricetes|Caudovirales|Chaseviridae|Yushanvirus|Shewanella virus Spp001	S	2733978	Viruses	Shewanella virus Spp001	0	4	1	0	0	0	3	0	2	2	8	3	0	0	1	0	0	0	0	0	0	0	1	0	0	0	8	1	1	1	1	1	0	0	0	0	0	0	0	0	0	0	0	0	0
root|Viruses|Duplodnaviria|Heunggongvirae|Uroviricota|Caudoviricetes|Caudovirales|Chaseviridae|Yushanvirus|Shewanella virus Spp001|Shewanella phage Spp001	S1	1445859	Viruses	Shewanella phage Spp001	0	4	1	0	0	0	3	0	2	2	8	3	0	0	1	0	0	0	0	0	0	0	1	0	0	0	8	1	1	1	1	1	0	0	0	0	0	0	0	0	0	0	0	0	0
root|Viruses|Duplodnaviria|Heunggongvirae|Uroviricota|Caudoviricetes|Caudovirales|Chaseviridae|Yushanvirus|Shewanella virus SppYZU05	S	2733979	Viruses	Shewanella virus SppYZU05	0	0	0	1	0	0	0	0	0	0	0	0	0	0	0	0	0	0	0	0	0	0	0	0	0	0	0	0	0	0	0	0	0	0	0	0	0	0	0	0	0	0	0	0	0
root|Viruses|Duplodnaviria|Heunggongvirae|Uroviricota|Caudoviricetes|Caudovirales|Chaseviridae|Yushanvirus|Shewanella virus SppYZU05|Shewanella phage SppYZU05	S1	1970795	Viruses	Shewanella phage SppYZU05	0	0	0	1	0	0	0	0	0	0	0	0	0	0	0	0	0	0	0	0	0	0	0	0	0	0	0	0	0	0	0	0	0	0	0	0	0	0	0	0	0	0	0	0	0
root|Viruses|Duplodnaviria|Heunggongvirae|Uroviricota|Caudoviricetes|Caudovirales|Demerecviridae	F	2731690	Viruses	Demerecviridae	20	27	38	25	30	24	28	20	8	12	31	12	9	23	5	6	12	29	6	0	1	10	3	2	0	9	8	19	18	11	1	19	7	23	5	7	21	4	5	8	17	12	0	6	7
root|Viruses|Duplodnaviria|Heunggongvirae|Uroviricota|Caudoviricetes|Caudovirales|Demerecviridae|Ermolyevavirinae	F1	2732012	Viruses	Ermolyevavirinae	8	3	3	3	6	2	0	0	2	1	3	2	1	5	1	2	0	3	0	0	0	1	0	0	0	2	1	2	1	3	1	1	0	0	0	0	2	0	1	0	1	3	0	2	0
root|Viruses|Duplodnaviria|Heunggongvirae|Uroviricota|Caudoviricetes|Caudovirales|Demerecviridae|Ermolyevavirinae|Cetovirus	G	2560112	Viruses	Cetovirus	8	3	2	1	4	0	0	0	2	1	1	1	1	2	0	2	0	1	0	0	0	1	0	0	0	1	0	2	0	3	0	0	0	0	0	0	1	0	0	0	0	1	0	0	0
root|Viruses|Duplodnaviria|Heunggongvirae|Uroviricota|Caudoviricetes|Caudovirales|Demerecviridae|Ermolyevavirinae|Cetovirus|Vibrio virus Ceto	S	2060092	Viruses	Vibrio virus Ceto	0	0	0	0	1	0	0	0	0	0	0	0	0	0	0	0	0	1	0	0	0	0	0	0	0	0	0	1	0	1	0	0	0	0	0	0	0	0	0	0	0	0	0	0	0
root|Viruses|Duplodnaviria|Heunggongvirae|Uroviricota|Caudoviricetes|Caudovirales|Demerecviridae|Ermolyevavirinae|Cetovirus|Vibrio virus Ceto	S1	2570300	Viruses	Vibrio phage Ceto	0	0	0	0	1	0	0	0	0	0	0	0	0	0	0	0	0	1	0	0	0	0	0	0	0	0	0	1	0	1	0	0	0	0	0	0	0	0	0	0	0	0	0	0	0
root|Viruses|Duplodnaviria|Heunggongvirae|Uroviricota|Caudoviricetes|Caudovirales|Demerecviridae|Ermolyevavirinae|Cetovirus|Vibrio virus Thalassa	S	2060093	Viruses	Vibrio virus Thalassa	8	3	2	1	3	0	0	0	1	1	1	1	1	2	0	2	0	0	0	0	0	1	0	0	0	1	0	1	0	2	0	0	0	0	0	0	1	0	0	0	0	1	0	0	0
root|Viruses|Duplodnaviria|Heunggongvirae|Uroviricota|Caudoviricetes|Caudovirales|Demerecviridae|Ermolyevavirinae|Cetovirus|Vibrio virus Thalassa	S1	2570301	Viruses	Vibrio phage Thalassa	8	3	2	1	3	0	0	0	1	1	1	1	1	2	0	2	0	0	0	0	0	1	0	0	0	1	0	1	0	2	0	0	0	0	0	0	1	0	0	0	0	1	0	0	0
root|Viruses|Duplodnaviria|Heunggongvirae|Uroviricota|Caudoviricetes|Caudovirales|Demerecviridae|Ermolyevavirinae|Jesfedecavirus	G	2560156	Viruses	Jesfedecavirus	0	0	0	1	0	0	0	0	0	0	1	0	0	0	1	0	0	0	0	0	0	0	0	0	0	1	1	0	0	0	1	1	0	0	0	0	1	0	0	0	1	0	0	2	0
root|Viruses|Duplodnaviria|Heunggongvirae|Uroviricota|Caudoviricetes|Caudovirales|Demerecviridae|Ermolyevavirinae|Jesfedecavirus|Vibrio virus phi3	S	2560836	Viruses	Vibrio virus phi3	0	0	0	1	0	0	0	0	0	0	0	0	0	0	0	0	0	0	0	0	0	0	0	0	0	0	0	0	0	0	1	0	0	0	0	0	0	0	0	0	0	0	0	0	0
root|Viruses|Duplodnaviria|Heunggongvirae|Uroviricota|Caudoviricetes|Caudovirales|Demerecviridae|Ermolyevavirinae|Jesfedecavirus|Vibrio virus phi3	S1	1589298	Viruses	Vibrio phage phi 3	0	0	0	1	0	0	0	0	0	0	0	0	0	0	0	0	0	0	0	0	0	0	0	0	0	0	0	0	0	0	1	0	0	0	0	0	0	0	0	0	0	0	0	0	0
root|Viruses|Duplodnaviria|Heunggongvirae|Uroviricota|Caudoviricetes|Caudovirales|Demerecviridae|Ermolyevavirinae|Vipunavirus	G	2732016	Viruses	Vipunavirus	0	0	0	1	1	2	0	0	0	0	1	0	0	2	0	0	0	0	0	0	0	0	0	0	0	0	0	0	1	0	0	0	0	0	0	0	0	0	1	0	0	2	0	0	0
root|Viruses|Duplodnaviria|Heunggongvirae|Uroviricota|Caudoviricetes|Caudovirales|Demerecviridae|Ermolyevavirinae|Vipunavirus|Vibrio virus pVp1	S	2560835	Viruses	Vibrio virus pVp1	0	0	0	1	1	2	0	0	0	0	1	0	0	2	0	0	0	0	0	0	0	0	0	0	0	0	0	0	1	0	0	0	0	0	0	0	0	0	1	0	0	2	0	0	0
root|Viruses|Duplodnaviria|Heunggongvirae|Uroviricota|Caudoviricetes|Caudovirales|Demerecviridae|Ermolyevavirinae|Vipunavirus|Vibrio virus pVp1	S1	1150989	Viruses	Vibrio phage pVp-1	0	0	0	1	1	2	0	0	0	0	1	0	0	2	0	0	0	0	0	0	0	0	0	0	0	0	0	0	1	0	0	0	0	0	0	0	0	0	1	0	0	2	0	0	0
root|Viruses|Duplodnaviria|Heunggongvirae|Uroviricota|Caudoviricetes|Caudovirales|Demerecviridae|Markadamsvirinae	F1	2732013	Viruses	Markadamsvirinae	10	20	33	19	16	20	18	18	5	6	23	9	8	15	3	4	10	14	5	0	1	7	2	1	0	6	4	15	15	8	0	13	5	21	4	6	15	3	2	8	15	8	0	3	6
root|Viruses|Duplodnaviria|Heunggongvirae|Uroviricota|Caudoviricetes|Caudovirales|Demerecviridae|Markadamsvirinae|Epseptimavirus	G	2732017	Viruses	Epseptimavirus	6	11	12	9	10	11	9	7	1	2	15	3	5	8	2	3	2	7	4	0	0	1	0	1	0	3	3	4	10	3	0	2	0	5	0	3	2	0	1	1	1	1	0	0	1
root|Viruses|Duplodnaviria|Heunggongvirae|Uroviricota|Caudoviricetes|Caudovirales|Demerecviridae|Markadamsvirinae|Epseptimavirus|Escherichia virus EPS7	S	491003	Viruses	Escherichia virus EPS7	0	0	0	0	0	0	0	0	0	0	0	0	0	1	0	0	0	0	0	0	0	0	0	0	0	0	0	0	0	0	0	0	0	0	0	0	0	0	0	0	0	0	0	0	0
root|Viruses|Duplodnaviria|Heunggongvirae|Uroviricota|Caudoviricetes|Caudovirales|Demerecviridae|Markadamsvirinae|Epseptimavirus|Escherichia virus saus132	S	2732020	Viruses	Escherichia virus saus132	0	1	0	0	0	0	0	0	0	0	0	0	0	0	0	0	0	0	0	0	0	0	0	0	0	0	0	0	0	0	0	0	0	0	0	0	1	0	0	0	0	0	0	0	0
root|Viruses|Duplodnaviria|Heunggongvirae|Uroviricota|Caudoviricetes|Caudovirales|Demerecviridae|Markadamsvirinae|Epseptimavirus|Escherichia virus saus132	S1	2024325	Viruses	Escherichia phage saus132	0	1	0	0	0	0	0	0	0	0	0	0	0	0	0	0	0	0	0	0	0	0	0	0	0	0	0	0	0	0	0	0	0	0	0	0	1	0	0	0	0	0	0	0	0
root|Viruses|Duplodnaviria|Heunggongvirae|Uroviricota|Caudoviricetes|Caudovirales|Demerecviridae|Markadamsvirinae|Epseptimavirus|Salmonella virus 123	S	2732021	Viruses	Salmonella virus 123	0	0	0	0	0	0	0	0	0	1	0	0	0	0	0	0	0	0	0	0	0	0	0	0	0	0	0	0	0	0	0	0	0	0	0	0	0	0	0	0	0	0	0	0	0
root|Viruses|Duplodnaviria|Heunggongvirae|Uroviricota|Caudoviricetes|Caudovirales|Demerecviridae|Markadamsvirinae|Epseptimavirus|Salmonella virus 123	S1	2508061	Viruses	Salmonella phage 1-23	0	0	0	0	0	0	0	0	0	1	0	0	0	0	0	0	0	0	0	0	0	0	0	0	0	0	0	0	0	0	0	0	0	0	0	0	0	0	0	0	0	0	0	0	0
root|Viruses|Duplodnaviria|Heunggongvirae|Uroviricota|Caudoviricetes|Caudovirales|Demerecviridae|Markadamsvirinae|Epseptimavirus|Salmonella virus LVR16A	S	2732023	Viruses	Salmonella virus LVR16A	0	0	1	0	1	0	1	1	0	0	0	0	0	0	0	0	0	0	0	0	0	0	0	0	0	0	0	0	0	0	0	0	0	0	0	0	0	0	0	0	0	0	0	0	0
root|Viruses|Duplodnaviria|Heunggongvirae|Uroviricota|Caudoviricetes|Caudovirales|Demerecviridae|Markadamsvirinae|Epseptimavirus|Salmonella virus LVR16A	S1	2041204	Viruses	Salmonella phage LVR16A	0	0	1	0	1	0	1	1	0	0	0	0	0	0	0	0	0	0	0	0	0	0	0	0	0	0	0	0	0	0	0	0	0	0	0	0	0	0	0	0	0	0	0	0	0
root|Viruses|Duplodnaviria|Heunggongvirae|Uroviricota|Caudoviricetes|Caudovirales|Demerecviridae|Markadamsvirinae|Epseptimavirus|Salmonella virus S113	S	2732024	Viruses	Salmonella virus S113	0	0	0	0	1	0	0	0	0	0	0	0	0	0	0	0	0	0	1	0	0	0	0	0	0	0	0	0	0	0	0	0	0	0	0	0	0	0	0	0	0	0	0	0	0
root|Viruses|Duplodnaviria|Heunggongvirae|Uroviricota|Caudoviricetes|Caudovirales|Demerecviridae|Markadamsvirinae|Epseptimavirus|Salmonella virus S113	S1	2231342	Viruses	Salmonella phage S113	0	0	0	0	1	0	0	0	0	0	0	0	0	0	0	0	0	0	1	0	0	0	0	0	0	0	0	0	0	0	0	0	0	0	0	0	0	0	0	0	0	0	0	0	0
root|Viruses|Duplodnaviria|Heunggongvirae|Uroviricota|Caudoviricetes|Caudovirales|Demerecviridae|Markadamsvirinae|Epseptimavirus|Salmonella virus S124	S	2732027	Viruses	Salmonella virus S124	0	0	2	0	1	0	0	1	0	0	0	0	0	0	0	0	0	0	0	0	0	0	0	1	0	0	0	0	0	0	0	0	0	0	0	0	0	0	0	1	0	0	0	0	0
root|Viruses|Duplodnaviria|Heunggongvirae|Uroviricota|Caudoviricetes|Caudovirales|Demerecviridae|Markadamsvirinae|Epseptimavirus|Salmonella virus S124	S1	2231351	Viruses	Salmonella phage S124	0	0	2	0	1	0	0	1	0	0	0	0	0	0	0	0	0	0	0	0	0	0	0	1	0	0	0	0	0	0	0	0	0	0	0	0	0	0	0	1	0	0	0	0	0
root|Viruses|Duplodnaviria|Heunggongvirae|Uroviricota|Caudoviricetes|Caudovirales|Demerecviridae|Markadamsvirinae|Epseptimavirus|Salmonella virus S132	S	2732029	Viruses	Salmonella virus S132	0	1	0	0	1	0	1	0	0	0	2	0	0	1	0	0	0	0	1	0	0	0	0	0	0	0	0	0	0	0	0	0	0	0	0	0	0	0	0	0	0	0	0	0	0
root|Viruses|Duplodnaviria|Heunggongvirae|Uroviricota|Caudoviricetes|Caudovirales|Demerecviridae|Markadamsvirinae|Epseptimavirus|Salmonella virus S132	S1	2231355	Viruses	Salmonella phage S132	0	1	0	0	1	0	1	0	0	0	2	0	0	1	0	0	0	0	1	0	0	0	0	0	0	0	0	0	0	0	0	0	0	0	0	0	0	0	0	0	0	0	0	0	0
root|Viruses|Duplodnaviria|Heunggongvirae|Uroviricota|Caudoviricetes|Caudovirales|Demerecviridae|Markadamsvirinae|Epseptimavirus|Salmonella virus S147	S	2732031	Viruses	Salmonella virus S147	0	0	0	0	0	0	0	0	0	0	0	0	0	0	0	0	0	0	0	0	0	0	0	0	0	0	0	1	0	0	0	0	0	0	0	0	0	0	0	0	0	0	0	0	0
root|Viruses|Duplodnaviria|Heunggongvirae|Uroviricota|Caudoviricetes|Caudovirales|Demerecviridae|Markadamsvirinae|Epseptimavirus|Salmonella virus S147	S1	2231362	Viruses	Salmonella phage S147	0	0	0	0	0	0	0	0	0	0	0	0	0	0	0	0	0	0	0	0	0	0	0	0	0	0	0	1	0	0	0	0	0	0	0	0	0	0	0	0	0	0	0	0	0
root|Viruses|Duplodnaviria|Heunggongvirae|Uroviricota|Caudoviricetes|Caudovirales|Demerecviridae|Markadamsvirinae|Epseptimavirus|Salmonella virus SH9	S	2732033	Viruses	Salmonella virus SH9	2	2	0	0	1	2	3	0	0	0	3	2	2	2	0	0	0	0	0	0	0	0	0	0	0	0	1	0	4	1	0	0	0	0	0	0	0	0	0	0	0	0	0	0	0
root|Viruses|Duplodnaviria|Heunggongvirae|Uroviricota|Caudoviricetes|Caudovirales|Demerecviridae|Markadamsvirinae|Epseptimavirus|Salmonella virus SH9	S1	2025819	Viruses	Salmonella phage SH9	2	2	0	0	1	2	3	0	0	0	3	2	2	2	0	0	0	0	0	0	0	0	0	0	0	0	1	0	4	1	0	0	0	0	0	0	0	0	0	0	0	0	0	0	0
root|Viruses|Duplodnaviria|Heunggongvirae|Uroviricota|Caudoviricetes|Caudovirales|Demerecviridae|Markadamsvirinae|Epseptimavirus|Salmonella virus STG2	S	2732034	Viruses	Salmonella virus STG2	0	1	0	1	0	1	1	0	0	1	2	0	1	1	0	2	0	2	0	0	0	1	0	0	0	0	0	0	0	0	0	1	0	0	0	0	0	0	0	0	0	0	0	0	0
root|Viruses|Duplodnaviria|Heunggongvirae|Uroviricota|Caudoviricetes|Caudovirales|Demerecviridae|Markadamsvirinae|Epseptimavirus|Salmonella virus STG2	S1	2480623	Viruses	Salmonella phage STG2	0	1	0	1	0	1	1	0	0	1	2	0	1	1	0	2	0	2	0	0	0	1	0	0	0	0	0	0	0	0	0	1	0	0	0	0	0	0	0	0	0	0	0	0	0
root|Viruses|Duplodnaviria|Heunggongvirae|Uroviricota|Caudoviricetes|Caudovirales|Demerecviridae|Markadamsvirinae|Epseptimavirus|Salmonella virus Stitch	S	1540099	Viruses	Salmonella virus Stitch	0	0	0	0	0	0	0	0	0	0	0	0	0	0	0	0	0	0	0	0	0	0	0	0	0	0	0	0	0	0	0	0	0	0	0	0	0	0	0	0	0	0	0	0	0
root|Viruses|Duplodnaviria|Heunggongvirae|Uroviricota|Caudoviricetes|Caudovirales|Demerecviridae|Markadamsvirinae|Epseptimavirus|Salmonella virus Sw2	S	2732035	Viruses	Salmonella virus Sw2	2	3	9	4	2	3	1	5	1	0	3	1	2	3	2	0	1	1	0	0	0	0	0	0	0	1	0	1	5	1	0	0	0	0	0	0	0	0	0	0	0	0	0	0	0
root|Viruses|Duplodnaviria|Heunggongvirae|Uroviricota|Caudoviricetes|Caudovirales|Demerecviridae|Markadamsvirinae|Epseptimavirus|Salmonella virus Sw2	S1	2316014	Viruses	Salmonella phage Sw2	2	3	9	4	2	3	1	5	1	0	3	1	2	3	2	0	1	1	0	0	0	0	0	0	0	1	0	1	5	1	0	0	0	0	0	0	0	0	0	0	0	0	0	0	0
root|Viruses|Duplodnaviria|Heunggongvirae|Uroviricota|Caudoviricetes|Caudovirales|Demerecviridae|Markadamsvirinae|Epseptimavirus|unclassified Epseptimavirus	G1	2738138	Viruses	unclassified Epseptimavirus	1	0	0	1	3	2	0	0	0	0	1	0	0	0	0	1	0	0	0	0	0	0	0	0	0	0	1	0	1	0	0	0	0	0	0	0	0	0	0	0	0	1	0	0	0
root|Viruses|Duplodnaviria|Heunggongvirae|Uroviricota|Caudoviricetes|Caudovirales|Demerecviridae|Markadamsvirinae|Epseptimavirus|unclassified Epseptimavirus	S	2565517	Viruses	Salmonella phage Sepoy	0	0	0	0	0	0	0	0	0	0	1	0	0	0	0	0	0	0	0	0	0	0	0	0	0	0	0	0	0	0	0	0	0	0	0	0	0	0	0	0	0	0	0	0	0
root|Viruses|Duplodnaviria|Heunggongvirae|Uroviricota|Caudoviricetes|Caudovirales|Demerecviridae|Markadamsvirinae|Epseptimavirus|unclassified Epseptimavirus	S	2591135	Viruses	Salmonella phage vB_SenS_SB13	1	0	0	1	1	2	0	0	0	0	0	0	0	0	0	1	0	0	0	0	0	0	0	0	0	0	0	0	0	0	0	0	0	0	0	0	0	0	0	0	0	0	0	0	0
root|Viruses|Duplodnaviria|Heunggongvirae|Uroviricota|Caudoviricetes|Caudovirales|Demerecviridae|Markadamsvirinae|Epseptimavirus|unclassified Epseptimavirus	S	2713277	Viruses	Salmonella phage atrejo	0	0	0	0	0	0	0	0	0	0	0	0	0	0	0	0	0	0	0	0	0	0	0	0	0	0	0	0	1	0	0	0	0	0	0	0	0	0	0	0	0	0	0	0	0
root|Viruses|Duplodnaviria|Heunggongvirae|Uroviricota|Caudoviricetes|Caudovirales|Demerecviridae|Markadamsvirinae|Haartmanvirus	G	2732018	Viruses	Haartmanvirus	1	0	0	1	2	0	0	0	0	0	0	0	0	0	0	0	1	1	0	0	1	1	0	0	0	0	0	1	1	0	0	0	0	1	0	3	2	0	0	0	0	5	0	1	1
root|Viruses|Duplodnaviria|Heunggongvirae|Uroviricota|Caudoviricetes|Caudovirales|Demerecviridae|Markadamsvirinae|Haartmanvirus|Yersinia virus phiR201	S	2732036	Viruses	Yersinia virus phiR201	1	0	0	1	2	0	0	0	0	0	0	0	0	0	0	0	1	1	0	0	1	1	0	0	0	0	0	1	1	0	0	0	0	1	0	3	2	0	0	0	0	5	0	1	1
root|Viruses|Duplodnaviria|Heunggongvirae|Uroviricota|Caudoviricetes|Caudovirales|Demerecviridae|Markadamsvirinae|Haartmanvirus|Yersinia virus phiR201	S1	1206557	Viruses	Yersinia phage phiR201	1	0	0	1	2	0	0	0	0	0	0	0	0	0	0	0	1	1	0	0	1	1	0	0	0	0	0	1	1	0	0	0	0	1	0	3	2	0	0	0	0	5	0	1	1
root|Viruses|Duplodnaviria|Heunggongvirae|Uroviricota|Caudoviricetes|Caudovirales|Demerecviridae|Markadamsvirinae|Tequintavirus	G	187218	Viruses	Tequintavirus	3	9	20	9	3	9	7	10	4	3	8	5	2	5	1	0	6	4	1	0	0	4	2	0	0	2	1	10	2	4	0	10	5	7	2	0	7	1	1	3	4	2	0	2	2
root|Viruses|Duplodnaviria|Heunggongvirae|Uroviricota|Caudoviricetes|Caudovirales|Demerecviridae|Markadamsvirinae|Tequintavirus|Escherichia virus AKFV33	S	1112008	Viruses	Escherichia virus AKFV33	1	0	7	2	0	0	0	0	0	0	0	0	0	0	0	0	0	0	0	0	0	0	0	0	0	0	0	0	0	0	0	0	0	0	0	0	1	0	0	0	0	0	0	0	0
root|Viruses|Duplodnaviria|Heunggongvirae|Uroviricota|Caudoviricetes|Caudovirales|Demerecviridae|Markadamsvirinae|Tequintavirus|Escherichia virus AKFV33	S1	2681605	Viruses	Escherichia phage vB_EcoS_AKFV33	1	0	7	2	0	0	0	0	0	0	0	0	0	0	0	0	0	0	0	0	0	0	0	0	0	0	0	0	0	0	0	0	0	0	0	0	1	0	0	0	0	0	0	0	0
root|Viruses|Duplodnaviria|Heunggongvirae|Uroviricota|Caudoviricetes|Caudovirales|Demerecviridae|Markadamsvirinae|Tequintavirus|Escherichia virus BF23	S	10707	Viruses	Escherichia virus BF23	0	0	0	0	0	0	0	0	0	0	0	0	0	0	0	0	0	1	0	0	0	0	0	0	0	0	0	0	0	0	0	0	0	0	0	0	0	0	0	0	0	0	0	0	0
root|Viruses|Duplodnaviria|Heunggongvirae|Uroviricota|Caudoviricetes|Caudovirales|Demerecviridae|Markadamsvirinae|Tequintavirus|Escherichia virus DT57C	S	1567006	Viruses	Escherichia virus DT57C	0	0	1	0	0	0	0	0	0	0	0	0	0	0	0	0	0	0	0	0	0	0	0	0	0	0	0	0	0	0	0	0	1	0	0	0	0	0	0	0	0	0	0	0	0
root|Viruses|Duplodnaviria|Heunggongvirae|Uroviricota|Caudoviricetes|Caudovirales|Demerecviridae|Markadamsvirinae|Tequintavirus|Escherichia virus FFH1	S	2049893	Viruses	Escherichia virus FFH1	0	0	1	0	0	0	0	0	0	0	0	0	0	0	0	0	1	0	0	0	0	0	0	0	0	0	0	0	0	0	0	0	0	0	0	0	1	0	0	0	0	0	0	0	0
root|Viruses|Duplodnaviria|Heunggongvirae|Uroviricota|Caudoviricetes|Caudovirales|Demerecviridae|Markadamsvirinae|Tequintavirus|Escherichia virus FFH1	S1	1446489	Viruses	Escherichia phage vB_EcoS_FFH_1	0	0	1	0	0	0	0	0	0	0	0	0	0	0	0	0	1	0	0	0	0	0	0	0	0	0	0	0	0	0	0	0	0	0	0	0	1	0	0	0	0	0	0	0	0
root|Viruses|Duplodnaviria|Heunggongvirae|Uroviricota|Caudoviricetes|Caudovirales|Demerecviridae|Markadamsvirinae|Tequintavirus|Escherichia virus Gostya9	S	2733983	Viruses	Escherichia virus Gostya9	0	0	0	3	0	0	0	0	0	0	0	0	0	0	0	0	0	0	0	0	0	0	0	0	0	0	0	2	0	0	0	0	0	0	0	0	0	0	0	0	0	0	0	0	0
root|Viruses|Duplodnaviria|Heunggongvirae|Uroviricota|Caudoviricetes|Caudovirales|Demerecviridae|Markadamsvirinae|Tequintavirus|Escherichia virus Gostya9	S1	2182345	Viruses	Escherichia phage Gostya9	0	0	0	3	0	0	0	0	0	0	0	0	0	0	0	0	0	0	0	0	0	0	0	0	0	0	0	2	0	0	0	0	0	0	0	0	0	0	0	0	0	0	0	0	0
root|Viruses|Duplodnaviria|Heunggongvirae|Uroviricota|Caudoviricetes|Caudovirales|Demerecviridae|Markadamsvirinae|Tequintavirus|Escherichia virus H8	S	352889	Viruses	Escherichia virus H8	0	0	0	0	0	0	2	0	0	0	0	0	0	0	0	0	0	0	1	0	0	0	0	0	0	0	0	0	0	0	0	0	0	0	0	0	0	0	0	0	0	0	0	0	0
root|Viruses|Duplodnaviria|Heunggongvirae|Uroviricota|Caudoviricetes|Caudovirales|Demerecviridae|Markadamsvirinae|Tequintavirus|Escherichia virus T5	S	10726	Viruses	Escherichia virus T5	0	0	0	0	0	1	0	0	0	0	0	0	0	1	0	0	0	0	0	0	0	0	0	0	0	0	0	0	0	0	0	0	0	0	0	0	0	0	0	0	0	0	0	0	0
root|Viruses|Duplodnaviria|Heunggongvirae|Uroviricota|Caudoviricetes|Caudovirales|Demerecviridae|Markadamsvirinae|Tequintavirus|Escherichia virus slur09	S	1982564	Viruses	Escherichia virus slur09	0	0	0	0	0	0	0	0	0	0	0	0	0	0	0	0	0	0	0	0	0	0	0	0	0	0	0	0	0	0	0	0	0	0	1	0	0	0	0	0	0	0	0	0	0
root|Viruses|Duplodnaviria|Heunggongvirae|Uroviricota|Caudoviricetes|Caudovirales|Demerecviridae|Markadamsvirinae|Tequintavirus|Escherichia virus slur09	S1	1728958	Viruses	Escherichia phage slur09	0	0	0	0	0	0	0	0	0	0	0	0	0	0	0	0	0	0	0	0	0	0	0	0	0	0	0	0	0	0	0	0	0	0	1	0	0	0	0	0	0	0	0	0	0
root|Viruses|Duplodnaviria|Heunggongvirae|Uroviricota|Caudoviricetes|Caudovirales|Demerecviridae|Markadamsvirinae|Tequintavirus|Salmonella virus NR01	S	2733988	Viruses	Salmonella virus NR01	0	0	0	0	1	0	0	0	0	0	0	0	0	0	0	0	0	0	0	0	0	0	0	0	0	0	0	0	0	0	0	0	0	0	0	0	0	0	0	0	0	0	0	0	0
root|Viruses|Duplodnaviria|Heunggongvirae|Uroviricota|Caudoviricetes|Caudovirales|Demerecviridae|Markadamsvirinae|Tequintavirus|Salmonella virus NR01	S1	1647411	Viruses	Salmonella phage NR01	0	0	0	0	1	0	0	0	0	0	0	0	0	0	0	0	0	0	0	0	0	0	0	0	0	0	0	0	0	0	0	0	0	0	0	0	0	0	0	0	0	0	0	0	0
root|Viruses|Duplodnaviria|Heunggongvirae|Uroviricota|Caudoviricetes|Caudovirales|Demerecviridae|Markadamsvirinae|Tequintavirus|Salmonella virus S131	S	2733989	Viruses	Salmonella virus S131	0	0	0	0	0	0	0	0	0	0	0	0	0	0	0	0	0	1	0	0	0	0	0	0	0	0	0	0	0	0	0	0	0	0	0	0	0	0	0	0	0	0	0	0	0
root|Viruses|Duplodnaviria|Heunggongvirae|Uroviricota|Caudoviricetes|Caudovirales|Demerecviridae|Markadamsvirinae|Tequintavirus|Salmonella virus S131	S1	2231354	Viruses	Salmonella phage S131	0	0	0	0	0	0	0	0	0	0	0	0	0	0	0	0	0	1	0	0	0	0	0	0	0	0	0	0	0	0	0	0	0	0	0	0	0	0	0	0	0	0	0	0	0
root|Viruses|Duplodnaviria|Heunggongvirae|Uroviricota|Caudoviricetes|Caudovirales|Demerecviridae|Markadamsvirinae|Tequintavirus|Salmonella virus SP01	S	2733990	Viruses	Salmonella virus SP01	0	0	0	0	0	0	0	0	0	0	0	0	0	0	0	0	0	0	0	0	0	0	0	0	0	0	0	0	0	0	0	1	0	0	0	0	0	0	0	0	0	0	0	1	0
root|Viruses|Duplodnaviria|Heunggongvirae|Uroviricota|Caudoviricetes|Caudovirales|Demerecviridae|Markadamsvirinae|Tequintavirus|Salmonella virus SP01	S1	1920294	Viruses	Salmonella phage SP01	0	0	0	0	0	0	0	0	0	0	0	0	0	0	0	0	0	0	0	0	0	0	0	0	0	0	0	0	0	0	0	1	0	0	0	0	0	0	0	0	0	0	0	1	0
root|Viruses|Duplodnaviria|Heunggongvirae|Uroviricota|Caudoviricetes|Caudovirales|Demerecviridae|Markadamsvirinae|Tequintavirus|Salmonella virus SP3	S	2733991	Viruses	Salmonella virus SP3	0	1	0	0	0	0	0	0	0	0	1	1	0	0	0	0	0	0	0	0	0	0	0	0	0	0	0	0	0	1	0	1	0	0	1	0	0	0	0	0	0	0	0	0	0
root|Viruses|Duplodnaviria|Heunggongvirae|Uroviricota|Caudoviricetes|Caudovirales|Demerecviridae|Markadamsvirinae|Tequintavirus|Salmonella virus SP3	S1	2053625	Viruses	Salmonella phage SP3	0	1	0	0	0	0	0	0	0	0	1	1	0	0	0	0	0	0	0	0	0	0	0	0	0	0	0	0	0	1	0	1	0	0	1	0	0	0	0	0	0	0	0	0	0
root|Viruses|Duplodnaviria|Heunggongvirae|Uroviricota|Caudoviricetes|Caudovirales|Demerecviridae|Markadamsvirinae|Tequintavirus|Salmonella virus SPC35	S	977927	Viruses	Salmonella virus SPC35	0	0	0	0	0	0	0	0	0	0	0	0	0	0	0	0	1	0	0	0	0	0	0	0	0	0	0	0	0	0	0	0	0	0	0	0	0	0	0	0	0	0	0	0	0
root|Viruses|Duplodnaviria|Heunggongvirae|Uroviricota|Caudoviricetes|Caudovirales|Demerecviridae|Markadamsvirinae|Tequintavirus|Shigella virus SHSML45	S	2733992	Viruses	Shigella virus SHSML45	0	1	1	0	0	1	0	0	0	0	0	0	0	2	0	0	0	0	0	0	0	0	0	0	0	0	0	0	0	0	0	0	0	0	0	0	0	0	0	0	0	0	0	0	0
root|Viruses|Duplodnaviria|Heunggongvirae|Uroviricota|Caudoviricetes|Caudovirales|Demerecviridae|Markadamsvirinae|Tequintavirus|Shigella virus SHSML45	S1	1863010	Viruses	Shigella phage SHSML-45	0	1	1	0	0	1	0	0	0	0	0	0	0	2	0	0	0	0	0	0	0	0	0	0	0	0	0	0	0	0	0	0	0	0	0	0	0	0	0	0	0	0	0	0	0
root|Viruses|Duplodnaviria|Heunggongvirae|Uroviricota|Caudoviricetes|Caudovirales|Demerecviridae|Markadamsvirinae|Tequintavirus|Shigella virus SSP1	S	2733993	Viruses	Shigella virus SSP1	0	0	0	0	0	0	0	1	1	0	0	0	0	0	0	0	0	0	0	0	0	0	0	0	0	0	0	0	0	0	0	0	0	0	0	0	0	0	0	0	1	0	0	0	0
root|Viruses|Duplodnaviria|Heunggongvirae|Uroviricota|Caudoviricetes|Caudovirales|Demerecviridae|Markadamsvirinae|Tequintavirus|Shigella virus SSP1	S1	1983588	Viruses	Shigella phage SSP1	0	0	0	0	0	0	0	1	1	0	0	0	0	0	0	0	0	0	0	0	0	0	0	0	0	0	0	0	0	0	0	0	0	0	0	0	0	0	0	0	1	0	0	0	0
root|Viruses|Duplodnaviria|Heunggongvirae|Uroviricota|Caudoviricetes|Caudovirales|Demerecviridae|Markadamsvirinae|Tequintavirus|unclassified Tequintavirus	G1	352888	Viruses	unclassified Tequintavirus	1	5	6	2	2	4	5	9	1	1	5	2	0	0	1	0	2	1	0	0	0	4	0	0	0	0	0	5	1	2	0	2	3	2	0	0	2	0	1	0	3	0	0	0	2
root|Viruses|Duplodnaviria|Heunggongvirae|Uroviricota|Caudoviricetes|Caudovirales|Demerecviridae|Markadamsvirinae|Tequintavirus|unclassified Tequintavirus	S	1655307	Viruses	Escherichia phage APCEc03	0	0	0	0	0	1	0	0	0	0	0	0	0	0	0	0	0	0	0	0	0	0	0	0	0	0	0	0	0	0	0	0	0	0	0	0	0	0	0	0	0	0	0	0	0
root|Viruses|Duplodnaviria|Heunggongvirae|Uroviricota|Caudoviricetes|Caudovirales|Demerecviridae|Markadamsvirinae|Tequintavirus|unclassified Tequintavirus	S	2024330	Viruses	Bacteriophage T5-like chee24	0	0	0	0	0	0	1	0	0	0	0	0	0	0	0	0	2	0	0	0	0	0	0	0	0	0	0	0	0	0	0	0	0	0	0	0	0	0	0	0	0	0	0	0	0
root|Viruses|Duplodnaviria|Heunggongvirae|Uroviricota|Caudoviricetes|Caudovirales|Demerecviridae|Markadamsvirinae|Tequintavirus|unclassified Tequintavirus	S	2184265	Viruses	Escherichia phage SP15	0	0	0	0	0	0	0	0	0	0	0	1	0	0	0	0	0	0	0	0	0	0	0	0	0	0	0	0	0	0	0	0	0	0	0	0	0	0	0	0	0	0	0	0	0
root|Viruses|Duplodnaviria|Heunggongvirae|Uroviricota|Caudoviricetes|Caudovirales|Demerecviridae|Markadamsvirinae|Tequintavirus|unclassified Tequintavirus	S	2315695	Viruses	Escherichia phage fp01	0	0	1	0	0	0	0	0	0	0	0	0	0	0	0	0	0	0	0	0	0	0	0	0	0	0	0	0	0	0	0	0	0	0	0	0	0	0	0	0	0	0	0	0	0
root|Viruses|Duplodnaviria|Heunggongvirae|Uroviricota|Caudoviricetes|Caudovirales|Demerecviridae|Markadamsvirinae|Tequintavirus|unclassified Tequintavirus	S	2508174	Viruses	Escherichia phage vB_EcoS_HdH2	0	0	0	0	0	1	0	5	0	0	1	0	0	0	0	0	0	1	0	0	0	2	0	0	0	0	0	4	0	0	0	0	0	0	0	0	0	0	0	0	0	0	0	0	0
root|Viruses|Duplodnaviria|Heunggongvirae|Uroviricota|Caudoviricetes|Caudovirales|Demerecviridae|Markadamsvirinae|Tequintavirus|unclassified Tequintavirus	S	2589656	Viruses	Salmonella phage Th1	0	0	0	0	0	0	0	0	0	0	1	0	0	0	0	0	0	0	0	0	0	0	0	0	0	0	0	0	0	0	0	0	0	0	0	0	0	0	0	0	0	0	0	0	0
root|Viruses|Duplodnaviria|Heunggongvirae|Uroviricota|Caudoviricetes|Caudovirales|Demerecviridae|Markadamsvirinae|Tequintavirus|unclassified Tequintavirus	S	2592163	Viruses	Salmonella virus VSe12	0	0	1	0	0	0	0	0	0	0	0	0	0	0	0	0	0	0	0	0	0	0	0	0	0	0	0	0	0	0	0	0	0	0	0	0	0	0	0	0	0	0	0	0	0
root|Viruses|Duplodnaviria|Heunggongvirae|Uroviricota|Caudoviricetes|Caudovirales|Demerecviridae|Markadamsvirinae|Tequintavirus|unclassified Tequintavirus	S	2592195	Viruses	Salmonella phage SE11	0	4	2	0	1	0	0	0	0	0	1	0	0	0	0	0	0	0	0	0	0	0	0	0	0	0	0	0	0	0	0	1	0	0	0	0	0	0	0	0	1	0	0	0	0
root|Viruses|Duplodnaviria|Heunggongvirae|Uroviricota|Caudoviricetes|Caudovirales|Demerecviridae|Markadamsvirinae|Tequintavirus|unclassified Tequintavirus	S	2608320	Viruses	Escherichia virus VEc33	0	0	0	0	0	2	3	4	1	0	0	0	0	0	1	0	0	0	0	0	0	1	0	0	0	0	0	1	0	0	0	1	0	0	0	0	1	0	0	0	2	0	0	0	0
root|Viruses|Duplodnaviria|Heunggongvirae|Uroviricota|Caudoviricetes|Caudovirales|Demerecviridae|Markadamsvirinae|Tequintavirus|unclassified Tequintavirus	S	2712970	Viruses	Phage NBEco001	0	0	0	1	0	0	0	0	0	0	0	0	0	0	0	0	0	0	0	0	0	0	0	0	0	0	0	0	1	0	0	0	0	0	0	0	0	0	0	0	0	0	0	0	0
root|Viruses|Duplodnaviria|Heunggongvirae|Uroviricota|Caudoviricetes|Caudovirales|Demerecviridae|Markadamsvirinae|Tequintavirus|unclassified Tequintavirus	S	2712971	Viruses	Phage NBEco002	0	0	1	0	1	0	1	0	0	0	1	0	0	0	0	0	0	0	0	0	0	0	0	0	0	0	0	0	0	0	0	0	3	1	0	0	1	0	1	0	0	0	0	0	2
root|Viruses|Duplodnaviria|Heunggongvirae|Uroviricota|Caudoviricetes|Caudovirales|Demerecviridae|Markadamsvirinae|Tequintavirus|unclassified Tequintavirus	S	2712977	Viruses	Phage NBSal003	0	0	0	0	0	0	0	0	0	0	0	0	0	0	0	0	0	0	0	0	0	1	0	0	0	0	0	0	0	0	0	0	0	0	0	0	0	0	0	0	0	0	0	0	0
root|Viruses|Duplodnaviria|Heunggongvirae|Uroviricota|Caudoviricetes|Caudovirales|Demerecviridae|Markadamsvirinae|Tequintavirus|unclassified Tequintavirus	S	2713222	Viruses	Salmonella phage L6jm	1	0	1	0	0	0	0	0	0	0	0	1	0	0	0	0	0	0	0	0	0	0	0	0	0	0	0	0	0	2	0	0	0	0	0	0	0	0	0	0	0	0	0	0	0
root|Viruses|Duplodnaviria|Heunggongvirae|Uroviricota|Caudoviricetes|Caudovirales|Demerecviridae|Markadamsvirinae|Tequintavirus|unclassified Tequintavirus	S	2713308	Viruses	Salmonella phage oldekolle	0	0	0	0	0	0	0	0	0	0	1	0	0	0	0	0	0	0	0	0	0	0	0	0	0	0	0	0	0	0	0	0	0	1	0	0	0	0	0	0	0	0	0	0	0
root|Viruses|Duplodnaviria|Heunggongvirae|Uroviricota|Caudoviricetes|Caudovirales|Demerecviridae|Mccorquodalevirinae	F1	2732014	Viruses	Mccorquodalevirinae	1	0	1	0	1	0	1	1	0	0	0	0	0	0	0	0	0	0	0	0	0	1	0	0	0	1	0	0	0	0	0	0	0	1	0	0	2	0	1	0	0	0	0	0	0
root|Viruses|Duplodnaviria|Heunggongvirae|Uroviricota|Caudoviricetes|Caudovirales|Demerecviridae|Mccorquodalevirinae|Hongcheonvirus	G	2732966	Viruses	Hongcheonvirus	1	0	0	0	0	0	0	1	0	0	0	0	0	0	0	0	0	0	0	0	0	0	0	0	0	1	0	0	0	0	0	0	0	1	0	0	1	0	1	0	0	0	0	0	0
root|Viruses|Duplodnaviria|Heunggongvirae|Uroviricota|Caudoviricetes|Caudovirales|Demerecviridae|Mccorquodalevirinae|Hongcheonvirus|Pectobacterium virus DUPPV	S	2733994	Viruses	Pectobacterium virus DUPPV	1	0	0	0	0	0	0	1	0	0	0	0	0	0	0	0	0	0	0	0	0	0	0	0	0	1	0	0	0	0	0	0	0	1	0	0	1	0	1	0	0	0	0	0	0
root|Viruses|Duplodnaviria|Heunggongvirae|Uroviricota|Caudoviricetes|Caudovirales|Demerecviridae|Mccorquodalevirinae|Hongcheonvirus|Pectobacterium virus DUPPV	S1	2041492	Viruses	Pectobacterium phage DU_PP_V	1	0	0	0	0	0	0	1	0	0	0	0	0	0	0	0	0	0	0	0	0	0	0	0	0	1	0	0	0	0	0	0	0	1	0	0	1	0	1	0	0	0	0	0	0
root|Viruses|Duplodnaviria|Heunggongvirae|Uroviricota|Caudoviricetes|Caudovirales|Demerecviridae|Mccorquodalevirinae|Myunavirus	G	2560180	Viruses	Myunavirus	0	0	1	0	1	0	1	0	0	0	0	0	0	0	0	0	0	0	0	0	0	1	0	0	0	0	0	0	0	0	0	0	0	0	0	0	1	0	0	0	0	0	0	0	0
root|Viruses|Duplodnaviria|Heunggongvirae|Uroviricota|Caudoviricetes|Caudovirales|Demerecviridae|Mccorquodalevirinae|Myunavirus|Pectobacterium virus My1	S	2560631	Viruses	Pectobacterium virus My1	0	0	1	0	1	0	1	0	0	0	0	0	0	0	0	0	0	0	0	0	0	1	0	0	0	0	0	0	0	0	0	0	0	0	0	0	1	0	0	0	0	0	0	0	0
root|Viruses|Duplodnaviria|Heunggongvirae|Uroviricota|Caudoviricetes|Caudovirales|Demerecviridae|Mccorquodalevirinae|Myunavirus|Pectobacterium virus My1	S1	1204539	Viruses	Pectobacterium phage My1	0	0	1	0	1	0	1	0	0	0	0	0	0	0	0	0	0	0	0	0	0	1	0	0	0	0	0	0	0	0	0	0	0	0	0	0	1	0	0	0	0	0	0	0	0
root|Viruses|Duplodnaviria|Heunggongvirae|Uroviricota|Caudoviricetes|Caudovirales|Demerecviridae|Novosibvirus	G	2560189	Viruses	Novosibvirus	0	1	0	0	7	1	0	0	0	1	2	0	0	2	0	0	0	6	0	0	0	0	0	1	0	0	0	0	0	0	0	5	2	1	1	0	1	1	0	0	0	0	0	0	0
root|Viruses|Duplodnaviria|Heunggongvirae|Uroviricota|Caudoviricetes|Caudovirales|Demerecviridae|Novosibvirus|Proteus virus PM135	S	2560651	Viruses	Proteus virus PM135	0	0	0	0	4	1	0	0	0	0	1	0	0	1	0	0	0	2	0	0	0	0	0	0	0	0	0	0	0	0	0	1	0	0	0	0	0	0	0	0	0	0	0	0	0
root|Viruses|Duplodnaviria|Heunggongvirae|Uroviricota|Caudoviricetes|Caudovirales|Demerecviridae|Novosibvirus|Proteus virus PM135|Proteus phage PM135	S1	2048008	Viruses	Proteus phage PM135	0	0	0	0	4	1	0	0	0	0	1	0	0	1	0	0	0	2	0	0	0	0	0	0	0	0	0	0	0	0	0	1	0	0	0	0	0	0	0	0	0	0	0	0	0
root|Viruses|Duplodnaviria|Heunggongvirae|Uroviricota|Caudoviricetes|Caudovirales|Demerecviridae|Novosibvirus|Proteus virus Stubb	S	2733995	Viruses	Proteus virus Stubb	0	0	0	0	2	0	0	0	0	0	1	0	0	0	0	0	0	4	0	0	0	0	0	1	0	0	0	0	0	0	0	0	0	0	0	0	1	0	0	0	0	0	0	0	0
root|Viruses|Duplodnaviria|Heunggongvirae|Uroviricota|Caudoviricetes|Caudovirales|Demerecviridae|Novosibvirus|Proteus virus Stubb|Proteus phage Stubb	S1	2315597	Viruses	Proteus phage Stubb	0	0	0	0	2	0	0	0	0	0	1	0	0	0	0	0	0	4	0	0	0	0	0	1	0	0	0	0	0	0	0	0	0	0	0	0	1	0	0	0	0	0	0	0	0
root|Viruses|Duplodnaviria|Heunggongvirae|Uroviricota|Caudoviricetes|Caudovirales|Demerecviridae|Pogseptimavirus	G	2732037	Viruses	Pogseptimavirus	0	0	0	2	0	0	1	0	1	2	0	1	0	0	0	0	0	4	0	0	0	0	0	0	0	0	0	1	1	0	0	0	0	0	0	0	1	0	0	0	0	1	0	0	0
root|Viruses|Duplodnaviria|Heunggongvirae|Uroviricota|Caudoviricetes|Caudovirales|Demerecviridae|Pogseptimavirus|Vibrio virus PG07	S	2733996	Viruses	Vibrio virus PG07	0	0	0	1	0	0	1	0	0	0	0	1	0	0	0	0	0	2	0	0	0	0	0	0	0	0	0	0	1	0	0	0	0	0	0	0	0	0	0	0	0	1	0	0	0
root|Viruses|Duplodnaviria|Heunggongvirae|Uroviricota|Caudoviricetes|Caudovirales|Demerecviridae|Pogseptimavirus|Vibrio virus PG07|Vibrio phage vB_VpS_PG07	S1	2301664	Viruses	Vibrio phage vB_VpS_PG07	0	0	0	1	0	0	1	0	0	0	0	1	0	0	0	0	0	2	0	0	0	0	0	0	0	0	0	0	1	0	0	0	0	0	0	0	0	0	0	0	0	1	0	0	0
root|Viruses|Duplodnaviria|Heunggongvirae|Uroviricota|Caudoviricetes|Caudovirales|Demerecviridae|Pogseptimavirus|Vibrio virus VspSw1	S	2733997	Viruses	Vibrio virus VspSw1	0	0	0	1	0	0	0	0	1	1	0	0	0	0	0	0	0	1	0	0	0	0	0	0	0	0	0	0	0	0	0	0	0	0	0	0	0	0	0	0	0	0	0	0	0
root|Viruses|Duplodnaviria|Heunggongvirae|Uroviricota|Caudoviricetes|Caudovirales|Demerecviridae|Pogseptimavirus|Vibrio virus VspSw1|Vibrio phage VspSw_1	S1	2484249	Viruses	Vibrio phage VspSw_1	0	0	0	1	0	0	0	0	1	1	0	0	0	0	0	0	0	1	0	0	0	0	0	0	0	0	0	0	0	0	0	0	0	0	0	0	0	0	0	0	0	0	0	0	0
root|Viruses|Duplodnaviria|Heunggongvirae|Uroviricota|Caudoviricetes|Caudovirales|Demerecviridae|Shenzhenvirus	G	2732038	Viruses	Shenzhenvirus	1	2	1	0	0	1	4	1	0	1	3	0	0	1	1	0	0	1	1	0	0	1	0	0	0	0	2	1	1	0	0	0	0	0	0	1	0	0	1	0	0	0	0	1	0
root|Viruses|Duplodnaviria|Heunggongvirae|Uroviricota|Caudoviricetes|Caudovirales|Demerecviridae|Shenzhenvirus|Aeromonas virus AhSzq1	S	2733998	Viruses	Aeromonas virus AhSzq1	0	0	1	0	0	0	1	0	0	0	1	0	0	0	0	0	0	0	0	0	0	0	0	0	0	0	0	0	1	0	0	0	0	0	0	1	0	0	1	0	0	0	0	1	0
root|Viruses|Duplodnaviria|Heunggongvirae|Uroviricota|Caudoviricetes|Caudovirales|Demerecviridae|Shenzhenvirus|Aeromonas virus AhSzq1|Aeromonas phage AhSzq-1	S1	2138298	Viruses	Aeromonas phage AhSzq-1	0	0	1	0	0	0	1	0	0	0	1	0	0	0	0	0	0	0	0	0	0	0	0	0	0	0	0	0	1	0	0	0	0	0	0	1	0	0	1	0	0	0	0	1	0
root|Viruses|Duplodnaviria|Heunggongvirae|Uroviricota|Caudoviricetes|Caudovirales|Demerecviridae|Shenzhenvirus|Aeromonas virus AhSzw1	S	2733999	Viruses	Aeromonas virus AhSzw1	1	2	0	0	0	1	3	1	0	1	2	0	0	1	1	0	0	1	1	0	0	1	0	0	0	0	1	1	0	0	0	0	0	0	0	0	0	0	0	0	0	0	0	0	0
root|Viruses|Duplodnaviria|Heunggongvirae|Uroviricota|Caudoviricetes|Caudovirales|Demerecviridae|Shenzhenvirus|Aeromonas virus AhSzw1|Aeromonas phage AhSzw-1	S1	2138299	Viruses	Aeromonas phage AhSzw-1	1	2	0	0	0	1	3	1	0	1	2	0	0	1	1	0	0	1	1	0	0	1	0	0	0	0	1	1	0	0	0	0	0	0	0	0	0	0	0	0	0	0	0	0	0
root|Viruses|Duplodnaviria|Heunggongvirae|Uroviricota|Caudoviricetes|Caudovirales|Demerecviridae|Sugarlandvirus	G	2560233	Viruses	Sugarlandvirus	0	1	0	1	0	0	4	0	0	1	0	0	0	0	0	0	0	0	0	0	0	0	1	0	0	0	1	0	0	0	0	0	0	0	0	0	0	0	0	0	1	0	0	0	1
root|Viruses|Duplodnaviria|Heunggongvirae|Uroviricota|Caudoviricetes|Caudovirales|Demerecviridae|Sugarlandvirus|Klebsiella virus IME260	S	2560539	Viruses	Klebsiella virus IME260	0	0	0	0	0	0	3	0	0	1	0	0	0	0	0	0	0	0	0	0	0	0	1	0	0	0	1	0	0	0	0	0	0	0	0	0	0	0	0	0	1	0	0	0	0
root|Viruses|Duplodnaviria|Heunggongvirae|Uroviricota|Caudoviricetes|Caudovirales|Demerecviridae|Sugarlandvirus|Klebsiella virus IME260|Klebsiella phage vB_Kpn_IME260	S1	1912318	Viruses	Klebsiella phage vB_Kpn_IME260	0	0	0	0	0	0	3	0	0	1	0	0	0	0	0	0	0	0	0	0	0	0	1	0	0	0	1	0	0	0	0	0	0	0	0	0	0	0	0	0	1	0	0	0	0
root|Viruses|Duplodnaviria|Heunggongvirae|Uroviricota|Caudoviricetes|Caudovirales|Demerecviridae|Sugarlandvirus|Klebsiella virus Sugarland	S	2560546	Viruses	Klebsiella virus Sugarland	0	1	0	0	0	0	0	0	0	0	0	0	0	0	0	0	0	0	0	0	0	0	0	0	0	0	0	0	0	0	0	0	0	0	0	0	0	0	0	0	0	0	0	0	1
root|Viruses|Duplodnaviria|Heunggongvirae|Uroviricota|Caudoviricetes|Caudovirales|Demerecviridae|Sugarlandvirus|Klebsiella virus Sugarland|Klebsiella phage Sugarland	S1	2053603	Viruses	Klebsiella phage Sugarland	0	1	0	0	0	0	0	0	0	0	0	0	0	0	0	0	0	0	0	0	0	0	0	0	0	0	0	0	0	0	0	0	0	0	0	0	0	0	0	0	0	0	0	0	1
root|Viruses|Duplodnaviria|Heunggongvirae|Uroviricota|Caudoviricetes|Caudovirales|Drexlerviridae	F	2731691	Viruses	Drexlerviridae	16	26	22	15	23	9	13	7	4	3	6	8	10	7	2	4	12	20	12	50	0	3	30	88	40	22	1	10	5	5	8	33	44	35	2	65	16	2	1	8	5	47	1	1	30
root|Viruses|Duplodnaviria|Heunggongvirae|Uroviricota|Caudoviricetes|Caudovirales|Drexlerviridae|Braunvirinae	F1	2732045	Viruses	Braunvirinae	3	5	8	5	6	0	4	1	0	0	0	1	2	1	0	0	1	4	1	0	0	0	0	0	0	0	0	1	0	0	0	0	0	0	0	1	0	0	0	0	0	0	0	0	0
root|Viruses|Duplodnaviria|Heunggongvirae|Uroviricota|Caudoviricetes|Caudovirales|Drexlerviridae|Braunvirinae|Christensenvirus	G	2732061	Viruses	Christensenvirus	0	0	0	0	1	0	1	0	0	0	0	1	0	1	0	0	0	0	0	0	0	0	0	0	0	0	0	1	0	0	0	0	0	0	0	0	0	0	0	0	0	0	0	0	0
root|Viruses|Duplodnaviria|Heunggongvirae|Uroviricota|Caudoviricetes|Caudovirales|Drexlerviridae|Braunvirinae|Christensenvirus|Escherichia virus IME542	S	2734000	Viruses	Escherichia virus IME542	0	0	0	0	1	0	1	0	0	0	0	1	0	1	0	0	0	0	0	0	0	0	0	0	0	0	0	1	0	0	0	0	0	0	0	0	0	0	0	0	0	0	0	0	0
root|Viruses|Duplodnaviria|Heunggongvirae|Uroviricota|Caudoviricetes|Caudovirales|Drexlerviridae|Braunvirinae|Christensenvirus|Escherichia virus IME542	S1	2507711	Viruses	Escherichia phage vB_EcoS_IME542	0	0	0	0	1	0	1	0	0	0	0	1	0	1	0	0	0	0	0	0	0	0	0	0	0	0	0	1	0	0	0	0	0	0	0	0	0	0	0	0	0	0	0	0	0
root|Viruses|Duplodnaviria|Heunggongvirae|Uroviricota|Caudoviricetes|Caudovirales|Drexlerviridae|Braunvirinae|Guelphvirus	G	2732062	Viruses	Guelphvirus	2	2	4	1	2	0	2	0	0	0	0	0	0	0	0	0	0	1	0	0	0	0	0	0	0	0	0	0	0	0	0	0	0	0	0	1	0	0	0	0	0	0	0	0	0
root|Viruses|Duplodnaviria|Heunggongvirae|Uroviricota|Caudoviricetes|Caudovirales|Drexlerviridae|Braunvirinae|Guelphvirus|Escherichia virus ACGM12	S	1945565	Viruses	Escherichia virus ACGM12	2	2	3	0	1	0	1	0	0	0	0	0	0	0	0	0	0	1	0	0	0	0	0	0	0	0	0	0	0	0	0	0	0	0	0	0	0	0	0	0	0	0	0	0	0
root|Viruses|Duplodnaviria|Heunggongvirae|Uroviricota|Caudoviricetes|Caudovirales|Drexlerviridae|Braunvirinae|Guelphvirus|Escherichia virus ACGM12	S1	1141140	Viruses	Escherichia phage vB_Eco_ACG-M12	2	2	3	0	1	0	1	0	0	0	0	0	0	0	0	0	0	1	0	0	0	0	0	0	0	0	0	0	0	0	0	0	0	0	0	0	0	0	0	0	0	0	0	0	0
root|Viruses|Duplodnaviria|Heunggongvirae|Uroviricota|Caudoviricetes|Caudovirales|Drexlerviridae|Braunvirinae|Guelphvirus|Escherichia virus EC3a	S	2734001	Viruses	Escherichia virus EC3a	0	0	1	1	1	0	1	0	0	0	0	0	0	0	0	0	0	0	0	0	0	0	0	0	0	0	0	0	0	0	0	0	0	0	0	1	0	0	0	0	0	0	0	0	0
root|Viruses|Duplodnaviria|Heunggongvirae|Uroviricota|Caudoviricetes|Caudovirales|Drexlerviridae|Braunvirinae|Guelphvirus|Escherichia virus EC3a	S1	1933774	Viruses	Escherichia phage vB_EcoS_CEB_EC3a	0	0	1	1	1	0	1	0	0	0	0	0	0	0	0	0	0	0	0	0	0	0	0	0	0	0	0	0	0	0	0	0	0	0	0	1	0	0	0	0	0	0	0	0	0
root|Viruses|Duplodnaviria|Heunggongvirae|Uroviricota|Caudoviricetes|Caudovirales|Drexlerviridae|Braunvirinae|Loudonvirus	G	2732063	Viruses	Loudonvirus	1	1	0	3	0	0	0	0	0	0	0	0	0	0	0	0	0	0	1	0	0	0	0	0	0	0	0	0	0	0	0	0	0	0	0	0	0	0	0	0	0	0	0	0	0
root|Viruses|Duplodnaviria|Heunggongvirae|Uroviricota|Caudoviricetes|Caudovirales|Drexlerviridae|Braunvirinae|Loudonvirus|Escherichia virus DTL	S	2734002	Viruses	Escherichia virus DTL	1	1	0	3	0	0	0	0	0	0	0	0	0	0	0	0	0	0	1	0	0	0	0	0	0	0	0	0	0	0	0	0	0	0	0	0	0	0	0	0	0	0	0	0	0
root|Viruses|Duplodnaviria|Heunggongvirae|Uroviricota|Caudoviricetes|Caudovirales|Drexlerviridae|Braunvirinae|Loudonvirus|Escherichia virus DTL	S1	2048061	Viruses	Escherichia phage DTL	1	1	0	3	0	0	0	0	0	0	0	0	0	0	0	0	0	0	1	0	0	0	0	0	0	0	0	0	0	0	0	0	0	0	0	0	0	0	0	0	0	0	0	0	0
root|Viruses|Duplodnaviria|Heunggongvirae|Uroviricota|Caudoviricetes|Caudovirales|Drexlerviridae|Braunvirinae|Rtpvirus	G	1920864	Viruses	Rtpvirus	0	2	4	1	3	0	1	1	0	0	0	0	2	0	0	0	1	3	0	0	0	0	0	0	0	0	0	0	0	0	0	0	0	0	0	0	0	0	0	0	0	0	0	0	0
root|Viruses|Duplodnaviria|Heunggongvirae|Uroviricota|Caudoviricetes|Caudovirales|Drexlerviridae|Braunvirinae|Rtpvirus|Escherichia virus IME253	S	2734003	Viruses	Escherichia virus IME253	0	0	1	0	1	0	0	1	0	0	0	0	0	0	0	0	0	0	0	0	0	0	0	0	0	0	0	0	0	0	0	0	0	0	0	0	0	0	0	0	0	0	0	0	0
root|Viruses|Duplodnaviria|Heunggongvirae|Uroviricota|Caudoviricetes|Caudovirales|Drexlerviridae|Braunvirinae|Rtpvirus|Escherichia virus IME253	S1	1933412	Viruses	Escherichia phage vB_EcoS-IME253	0	0	1	0	1	0	0	1	0	0	0	0	0	0	0	0	0	0	0	0	0	0	0	0	0	0	0	0	0	0	0	0	0	0	0	0	0	0	0	0	0	0	0	0	0
root|Viruses|Duplodnaviria|Heunggongvirae|Uroviricota|Caudoviricetes|Caudovirales|Drexlerviridae|Braunvirinae|Rtpvirus|Escherichia virus Rtp	S	355246	Viruses	Escherichia virus Rtp	0	1	0	0	0	0	0	0	0	0	0	0	0	0	0	0	0	2	0	0	0	0	0	0	0	0	0	0	0	0	0	0	0	0	0	0	0	0	0	0	0	0	0	0	0
root|Viruses|Duplodnaviria|Heunggongvirae|Uroviricota|Caudoviricetes|Caudovirales|Drexlerviridae|Braunvirinae|Rtpvirus|unclassified Rtpvirus	G1	2315201	Viruses	unclassified Rtpvirus	0	0	0	1	2	0	1	0	0	0	0	0	2	0	0	0	1	1	0	0	0	0	0	0	0	0	0	0	0	0	0	0	0	0	0	0	0	0	0	0	0	0	0	0	0
root|Viruses|Duplodnaviria|Heunggongvirae|Uroviricota|Caudoviricetes|Caudovirales|Drexlerviridae|Braunvirinae|Rtpvirus|unclassified Rtpvirus	S	2576500	Viruses	Escherichia phage vB_EcoS-12210I	0	0	0	1	2	0	1	0	0	0	0	0	2	0	0	0	1	1	0	0	0	0	0	0	0	0	0	0	0	0	0	0	0	0	0	0	0	0	0	0	0	0	0	0	0
root|Viruses|Duplodnaviria|Heunggongvirae|Uroviricota|Caudoviricetes|Caudovirales|Drexlerviridae|Eclunavirus	G	2560123	Viruses	Eclunavirus	2	0	1	0	0	0	0	0	1	0	0	0	1	0	0	1	2	1	1	0	0	0	0	0	0	0	0	1	0	0	0	0	0	0	0	0	0	0	0	0	0	0	0	0	0
root|Viruses|Duplodnaviria|Heunggongvirae|Uroviricota|Caudoviricetes|Caudovirales|Drexlerviridae|Eclunavirus|Enterobacter virus EcL1	S	2560414	Viruses	Enterobacter virus EcL1	1	0	0	0	0	0	0	0	1	0	0	0	1	0	0	0	1	0	1	0	0	0	0	0	0	0	0	1	0	0	0	0	0	0	0	0	0	0	0	0	0	0	0	0	0
root|Viruses|Duplodnaviria|Heunggongvirae|Uroviricota|Caudoviricetes|Caudovirales|Drexlerviridae|Eclunavirus|Enterobacter virus EcL1|Enterobacter phage Ec_L1	S1	2070180	Viruses	Enterobacter phage Ec_L1	1	0	0	0	0	0	0	0	1	0	0	0	1	0	0	0	1	0	1	0	0	0	0	0	0	0	0	1	0	0	0	0	0	0	0	0	0	0	0	0	0	0	0	0	0
root|Viruses|Duplodnaviria|Heunggongvirae|Uroviricota|Caudoviricetes|Caudovirales|Drexlerviridae|Eclunavirus|unclassified Eclunavirus	G1	2571108	Viruses	unclassified Eclunavirus	1	0	1	0	0	0	0	0	0	0	0	0	0	0	0	1	1	1	0	0	0	0	0	0	0	0	0	0	0	0	0	0	0	0	0	0	0	0	0	0	0	0	0	0	0
root|Viruses|Duplodnaviria|Heunggongvirae|Uroviricota|Caudoviricetes|Caudovirales|Drexlerviridae|Eclunavirus|unclassified Eclunavirus|Enterobacteria phage vB_EcoS_NBD2	S	1852563	Viruses	Enterobacteria phage vB_EcoS_NBD2	1	0	1	0	0	0	0	0	0	0	0	0	0	0	0	1	1	1	0	0	0	0	0	0	0	0	0	0	0	0	0	0	0	0	0	0	0	0	0	0	0	0	0	0	0
root|Viruses|Duplodnaviria|Heunggongvirae|Uroviricota|Caudoviricetes|Caudovirales|Drexlerviridae|Nouzillyvirus	G	2732049	Viruses	Nouzillyvirus	0	4	0	0	3	0	0	0	0	0	0	0	0	0	0	0	2	1	2	0	0	0	0	0	0	0	0	0	0	0	0	0	0	0	0	0	0	0	0	0	0	0	0	0	0
root|Viruses|Duplodnaviria|Heunggongvirae|Uroviricota|Caudoviricetes|Caudovirales|Drexlerviridae|Nouzillyvirus|Escherichia virus ESCO41	S	2734029	Viruses	Escherichia virus ESCO41	0	4	0	0	3	0	0	0	0	0	0	0	0	0	0	0	2	1	2	0	0	0	0	0	0	0	0	0	0	0	0	0	0	0	0	0	0	0	0	0	0	0	0	0	0
root|Viruses|Duplodnaviria|Heunggongvirae|Uroviricota|Caudoviricetes|Caudovirales|Drexlerviridae|Nouzillyvirus|Escherichia virus ESCO41|Escherichia phage vB_EcoS_ESCO41	S1	2496547	Viruses	Escherichia phage vB_EcoS_ESCO41	0	4	0	0	3	0	0	0	0	0	0	0	0	0	0	0	2	1	2	0	0	0	0	0	0	0	0	0	0	0	0	0	0	0	0	0	0	0	0	0	0	0	0	0	0
root|Viruses|Duplodnaviria|Heunggongvirae|Uroviricota|Caudoviricetes|Caudovirales|Drexlerviridae|Rogunavirinae	F1	2732046	Viruses	Rogunavirinae	1	3	3	2	3	3	0	3	1	0	0	3	3	0	0	2	0	1	1	0	0	1	1	0	0	1	0	1	3	2	1	1	1	7	0	0	0	0	0	0	0	1	0	0	0
root|Viruses|Duplodnaviria|Heunggongvirae|Uroviricota|Caudoviricetes|Caudovirales|Drexlerviridae|Rogunavirinae|Eastlansingvirus	G	2732064	Viruses	Eastlansingvirus	1	2	2	2	3	1	0	1	0	0	0	0	1	0	0	1	0	0	1	0	0	1	1	0	0	1	0	0	1	1	0	0	1	0	0	0	0	0	0	0	0	0	0	0	0
root|Viruses|Duplodnaviria|Heunggongvirae|Uroviricota|Caudoviricetes|Caudovirales|Drexlerviridae|Rogunavirinae|Eastlansingvirus|Shigella virus Sf12	S	2734004	Viruses	Shigella virus Sf12	1	2	2	2	3	1	0	1	0	0	0	0	1	0	0	1	0	0	1	0	0	1	1	0	0	1	0	0	1	1	0	0	1	0	0	0	0	0	0	0	0	0	0	0	0
root|Viruses|Duplodnaviria|Heunggongvirae|Uroviricota|Caudoviricetes|Caudovirales|Drexlerviridae|Rogunavirinae|Eastlansingvirus|Shigella virus Sf12	S1	2024315	Viruses	Shigella phage Sf12	1	2	2	2	3	1	0	1	0	0	0	0	1	0	0	1	0	0	1	0	0	1	1	0	0	1	0	0	1	1	0	0	1	0	0	0	0	0	0	0	0	0	0	0	0
root|Viruses|Duplodnaviria|Heunggongvirae|Uroviricota|Caudoviricetes|Caudovirales|Drexlerviridae|Rogunavirinae|Rogunavirus	G	1920866	Viruses	Rogunavirus	0	1	0	0	0	2	0	1	1	0	0	2	2	0	0	1	0	0	0	0	0	0	0	0	0	0	0	1	2	0	0	1	0	7	0	0	0	0	0	0	0	1	0	0	0
root|Viruses|Duplodnaviria|Heunggongvirae|Uroviricota|Caudoviricetes|Caudovirales|Drexlerviridae|Rogunavirinae|Rogunavirus|Escherichia virus E41c	S	1920996	Viruses	Escherichia virus E41c	0	1	0	0	0	0	0	1	0	0	0	0	0	0	0	0	0	0	0	0	0	0	0	0	0	0	0	0	1	0	0	0	0	0	0	0	0	0	0	0	0	0	0	0	0
root|Viruses|Duplodnaviria|Heunggongvirae|Uroviricota|Caudoviricetes|Caudovirales|Drexlerviridae|Rogunavirinae|Rogunavirus|Escherichia virus E41c	S1	1495286	Viruses	Escherichia phage e4/1c	0	1	0	0	0	0	0	1	0	0	0	0	0	0	0	0	0	0	0	0	0	0	0	0	0	0	0	0	1	0	0	0	0	0	0	0	0	0	0	0	0	0	0	0	0
root|Viruses|Duplodnaviria|Heunggongvirae|Uroviricota|Caudoviricetes|Caudovirales|Drexlerviridae|Rogunavirinae|Rogunavirus|Escherichia virus KP26	S	1920999	Viruses	Escherichia virus KP26	0	0	0	0	0	1	0	0	0	0	0	1	1	0	0	0	0	0	0	0	0	0	0	0	0	0	0	0	0	0	0	0	0	0	0	0	0	0	0	0	0	0	0	0	0
root|Viruses|Duplodnaviria|Heunggongvirae|Uroviricota|Caudoviricetes|Caudovirales|Drexlerviridae|Rogunavirinae|Wilsonroadvirus	G	2732066	Viruses	Wilsonroadvirus	0	0	0	0	0	0	0	0	0	0	0	0	0	0	0	0	0	1	0	0	0	0	0	0	0	0	0	0	0	1	1	0	0	0	0	0	0	0	0	0	0	0	0	0	0
root|Viruses|Duplodnaviria|Heunggongvirae|Uroviricota|Caudoviricetes|Caudovirales|Drexlerviridae|Rogunavirinae|Wilsonroadvirus|Shigella virus Sd1	S	2734007	Viruses	Shigella virus Sd1	0	0	0	0	0	0	0	0	0	0	0	0	0	0	0	0	0	1	0	0	0	0	0	0	0	0	0	0	0	1	1	0	0	0	0	0	0	0	0	0	0	0	0	0	0
root|Viruses|Duplodnaviria|Heunggongvirae|Uroviricota|Caudoviricetes|Caudovirales|Drexlerviridae|Rogunavirinae|Wilsonroadvirus|Shigella virus Sd1	S1	2024313	Viruses	Shigella phage Sd1	0	0	0	0	0	0	0	0	0	0	0	0	0	0	0	0	0	1	0	0	0	0	0	0	0	0	0	0	0	1	1	0	0	0	0	0	0	0	0	0	0	0	0	0	0
root|Viruses|Duplodnaviria|Heunggongvirae|Uroviricota|Caudoviricetes|Caudovirales|Drexlerviridae|Sauletekiovirus	G	2732050	Viruses	Sauletekiovirus	0	0	0	0	0	0	0	0	0	0	1	0	0	0	0	0	0	2	0	0	0	0	0	0	0	0	0	0	0	0	0	0	0	0	1	0	1	0	0	0	0	0	0	0	0
root|Viruses|Duplodnaviria|Heunggongvirae|Uroviricota|Caudoviricetes|Caudovirales|Drexlerviridae|Sauletekiovirus|Pantoea virus AAS23	S	2734030	Viruses	Pantoea virus AAS23	0	0	0	0	0	0	0	0	0	0	1	0	0	0	0	0	0	2	0	0	0	0	0	0	0	0	0	0	0	0	0	0	0	0	1	0	1	0	0	0	0	0	0	0	0
root|Viruses|Duplodnaviria|Heunggongvirae|Uroviricota|Caudoviricetes|Caudovirales|Drexlerviridae|Sauletekiovirus|Pantoea virus AAS23|Pantoea phage vB_PagS_AAS23	S1	2499073	Viruses	Pantoea phage vB_PagS_AAS23	0	0	0	0	0	0	0	0	0	0	1	0	0	0	0	0	0	2	0	0	0	0	0	0	0	0	0	0	0	0	0	0	0	0	1	0	1	0	0	0	0	0	0	0	0
root|Viruses|Duplodnaviria|Heunggongvirae|Uroviricota|Caudoviricetes|Caudovirales|Drexlerviridae|Tempevirinae	F1	2732047	Viruses	Tempevirinae	6	8	2	3	4	2	4	1	2	0	2	1	2	5	1	1	4	4	2	10	0	0	0	2	0	4	1	4	2	0	0	26	42	27	1	47	13	2	1	7	5	44	1	0	23
root|Viruses|Duplodnaviria|Heunggongvirae|Uroviricota|Caudoviricetes|Caudovirales|Drexlerviridae|Tempevirinae|Hanrivervirus	G	2560145	Viruses	Hanrivervirus	3	4	1	2	3	0	2	0	2	0	1	0	0	4	0	0	0	4	0	0	0	0	0	2	0	0	1	3	2	0	0	1	0	0	0	0	2	0	0	0	0	3	1	0	0
root|Viruses|Duplodnaviria|Heunggongvirae|Uroviricota|Caudoviricetes|Caudovirales|Drexlerviridae|Tempevirinae|Hanrivervirus|unclassified Hanrivervirus	G1	2585109	Viruses	unclassified Hanrivervirus	2	2	1	2	2	0	2	0	2	0	0	0	0	4	0	0	0	3	0	0	0	0	0	2	0	0	0	3	0	0	0	1	0	0	0	0	2	0	0	0	0	3	1	0	0
root|Viruses|Duplodnaviria|Heunggongvirae|Uroviricota|Caudoviricetes|Caudovirales|Drexlerviridae|Tempevirinae|Hanrivervirus|unclassified Hanrivervirus	S	2596677	Viruses	Escherichia phage Henu8	0	0	0	0	0	0	0	0	0	0	0	0	0	0	0	0	0	1	0	0	0	0	0	0	0	0	0	1	0	0	0	0	0	0	0	0	0	0	0	0	0	0	0	0	0
root|Viruses|Duplodnaviria|Heunggongvirae|Uroviricota|Caudoviricetes|Caudovirales|Drexlerviridae|Tempevirinae|Hanrivervirus|unclassified Hanrivervirus	S	2696376	Viruses	Escherichia phage aaroes	0	0	0	0	0	0	0	0	2	0	0	0	0	0	0	0	0	0	0	0	0	0	0	0	0	0	0	0	0	0	0	0	0	0	0	0	0	0	0	0	0	0	0	0	0
root|Viruses|Duplodnaviria|Heunggongvirae|Uroviricota|Caudoviricetes|Caudovirales|Drexlerviridae|Tempevirinae|Hanrivervirus|unclassified Hanrivervirus	S	2696402	Viruses	Escherichia phage haarsle	0	0	0	1	0	0	0	0	0	0	0	0	0	0	0	0	0	0	0	0	0	0	0	0	0	0	0	0	0	0	0	0	0	0	0	0	0	0	0	0	0	0	0	0	0
root|Viruses|Duplodnaviria|Heunggongvirae|Uroviricota|Caudoviricetes|Caudovirales|Drexlerviridae|Tempevirinae|Hanrivervirus|unclassified Hanrivervirus	S	2696404	Viruses	Escherichia phage herni	0	0	0	0	0	0	0	0	0	0	0	0	0	0	0	0	0	1	0	0	0	0	0	0	0	0	0	0	0	0	0	0	0	0	0	0	0	0	0	0	0	0	0	0	0
root|Viruses|Duplodnaviria|Heunggongvirae|Uroviricota|Caudoviricetes|Caudovirales|Drexlerviridae|Tempevirinae|Hanrivervirus|unclassified Hanrivervirus	S	2714735	Viruses	Escherichia phage PGN590	1	2	0	0	2	0	0	0	0	0	0	0	0	0	0	0	0	0	0	0	0	0	0	0	0	0	0	2	0	0	0	0	0	0	0	0	0	0	0	0	0	0	0	0	0
root|Viruses|Duplodnaviria|Heunggongvirae|Uroviricota|Caudoviricetes|Caudovirales|Drexlerviridae|Tempevirinae|Hanrivervirus|unclassified Hanrivervirus	S	2736192	Viruses	Shigella virus 2019SD1	1	0	1	0	0	0	1	0	0	0	0	0	0	4	0	0	0	0	0	0	0	0	0	2	0	0	0	0	0	0	0	0	0	0	0	0	2	0	0	0	0	3	1	0	0
root|Viruses|Duplodnaviria|Heunggongvirae|Uroviricota|Caudoviricetes|Caudovirales|Drexlerviridae|Tempevirinae|Tlsvirus	G	1920865	Viruses	Tlsvirus	1	0	1	1	1	2	0	1	0	0	0	0	1	0	1	1	2	0	2	10	0	0	0	0	0	4	0	0	0	0	0	25	42	27	0	47	10	2	1	7	5	41	0	0	23
root|Viruses|Duplodnaviria|Heunggongvirae|Uroviricota|Caudoviricetes|Caudovirales|Drexlerviridae|Tempevirinae|Tlsvirus|Citrobacter virus DK2017	S	2734008	Viruses	Citrobacter virus DK2017	0	0	0	0	0	0	0	1	0	0	0	0	1	0	0	0	1	0	1	0	0	0	0	0	0	0	0	0	0	0	0	0	0	0	0	0	0	0	0	0	0	0	0	0	0
root|Viruses|Duplodnaviria|Heunggongvirae|Uroviricota|Caudoviricetes|Caudovirales|Drexlerviridae|Tempevirinae|Tlsvirus|Citrobacter virus DK2017	S1	2267237	Viruses	Citrobacter phage CF1 DK-2017	0	0	0	0	0	0	0	1	0	0	0	0	1	0	0	0	1	0	1	0	0	0	0	0	0	0	0	0	0	0	0	0	0	0	0	0	0	0	0	0	0	0	0	0	0
root|Viruses|Duplodnaviria|Heunggongvirae|Uroviricota|Caudoviricetes|Caudovirales|Drexlerviridae|Tempevirinae|Tlsvirus|Citrobacter virus Stevie	S	1540096	Viruses	Citrobacter virus Stevie	0	0	0	0	0	1	0	0	0	0	0	0	0	0	0	1	0	0	0	0	0	0	0	0	0	0	0	0	0	0	0	0	0	0	0	0	0	0	0	0	0	0	0	0	0
root|Viruses|Duplodnaviria|Heunggongvirae|Uroviricota|Caudoviricetes|Caudovirales|Drexlerviridae|Tempevirinae|Tlsvirus|Salmonella virus PHB07	S	2734012	Viruses	Salmonella virus PHB07	0	0	0	1	0	0	0	0	0	0	0	0	0	0	0	0	0	0	0	0	0	0	0	0	0	0	0	0	0	0	0	0	0	0	0	0	0	0	0	0	0	0	0	0	0
root|Viruses|Duplodnaviria|Heunggongvirae|Uroviricota|Caudoviricetes|Caudovirales|Drexlerviridae|Tempevirinae|Tlsvirus|Salmonella virus PHB07	S1	2136179	Viruses	Salmonella phage vB_SenS_PHB07	0	0	0	1	0	0	0	0	0	0	0	0	0	0	0	0	0	0	0	0	0	0	0	0	0	0	0	0	0	0	0	0	0	0	0	0	0	0	0	0	0	0	0	0	0
root|Viruses|Duplodnaviria|Heunggongvirae|Uroviricota|Caudoviricetes|Caudovirales|Drexlerviridae|Tempevirinae|Tlsvirus|Salmonella virus SP126	S	1173741	Viruses	Salmonella virus SP126	1	0	0	0	0	0	0	0	0	0	0	0	0	0	0	0	0	0	1	0	0	0	0	0	0	0	0	0	0	0	0	0	0	0	0	0	0	0	0	0	0	0	0	0	0
root|Viruses|Duplodnaviria|Heunggongvirae|Uroviricota|Caudoviricetes|Caudovirales|Drexlerviridae|Tempevirinae|Tlsvirus|Salmonella virus phSE2	S	2734013	Viruses	Salmonella virus phSE2	0	0	0	0	0	0	0	0	0	0	0	0	0	0	0	0	1	0	0	0	0	0	0	0	0	0	0	0	0	0	0	0	0	0	0	0	0	0	0	0	0	0	0	0	0
root|Viruses|Duplodnaviria|Heunggongvirae|Uroviricota|Caudoviricetes|Caudovirales|Drexlerviridae|Tempevirinae|Tlsvirus|Salmonella virus phSE2	S1	1837218	Viruses	Salmonella phage phSE-2	0	0	0	0	0	0	0	0	0	0	0	0	0	0	0	0	1	0	0	0	0	0	0	0	0	0	0	0	0	0	0	0	0	0	0	0	0	0	0	0	0	0	0	0	0
root|Viruses|Duplodnaviria|Heunggongvirae|Uroviricota|Caudoviricetes|Caudovirales|Drexlerviridae|Tempevirinae|Warwickvirus	G	2732068	Viruses	Warwickvirus	2	4	0	0	0	0	2	0	0	0	1	1	1	1	0	0	2	0	0	0	0	0	0	0	0	0	0	1	0	0	0	0	0	0	1	0	1	0	0	0	0	0	0	0	0
root|Viruses|Duplodnaviria|Heunggongvirae|Uroviricota|Caudoviricetes|Caudovirales|Drexlerviridae|Tempevirinae|Warwickvirus|unclassified Warwickvirus	G1	2752589	Viruses	unclassified Warwickvirus	0	1	0	0	0	0	1	0	0	0	0	0	0	0	0	0	0	0	0	0	0	0	0	0	0	0	0	0	0	0	0	0	0	0	0	0	0	0	0	0	0	0	0	0	0
root|Viruses|Duplodnaviria|Heunggongvirae|Uroviricota|Caudoviricetes|Caudovirales|Drexlerviridae|Tempevirinae|Warwickvirus|unclassified Warwickvirus	S	2696450	Viruses	Escherichia phage tonijn	0	1	0	0	0	0	0	0	0	0	0	0	0	0	0	0	0	0	0	0	0	0	0	0	0	0	0	0	0	0	0	0	0	0	0	0	0	0	0	0	0	0	0	0	0
root|Viruses|Duplodnaviria|Heunggongvirae|Uroviricota|Caudoviricetes|Caudovirales|Drexlerviridae|Tempevirinae|Warwickvirus|unclassified Warwickvirus	S	2696456	Viruses	Escherichia phage tunus	0	0	0	0	0	0	1	0	0	0	0	0	0	0	0	0	0	0	0	0	0	0	0	0	0	0	0	0	0	0	0	0	0	0	0	0	0	0	0	0	0	0	0	0	0
root|Viruses|Duplodnaviria|Heunggongvirae|Uroviricota|Caudoviricetes|Caudovirales|Drexlerviridae|Tunavirinae	F1	1910999	Viruses	Tunavirinae	1	3	4	1	4	3	2	1	0	2	0	1	0	0	1	0	1	0	1	0	0	0	29	83	40	17	0	2	0	1	7	2	0	0	0	16	0	0	0	0	0	0	0	1	7
root|Viruses|Duplodnaviria|Heunggongvirae|Uroviricota|Caudoviricetes|Caudovirales|Drexlerviridae|Tunavirinae|Cronobacter virus Esp2949-1	S	1073767	Viruses	Cronobacter virus Esp2949-1	0	0	0	0	0	0	2	0	0	0	0	0	0	0	0	0	0	0	0	0	0	0	0	0	0	0	0	0	0	0	0	0	0	0	0	0	0	0	0	0	0	0	0	0	0
root|Viruses|Duplodnaviria|Heunggongvirae|Uroviricota|Caudoviricetes|Caudovirales|Drexlerviridae|Tunavirinae|Sertoctavirus	G	2560227	Viruses	Sertoctavirus	0	0	2	0	0	0	0	0	0	0	0	0	0	0	0	0	0	0	1	0	0	0	0	0	0	0	0	0	0	0	0	0	0	0	0	0	0	0	0	0	0	0	0	0	0
root|Viruses|Duplodnaviria|Heunggongvirae|Uroviricota|Caudoviricetes|Caudovirales|Drexlerviridae|Tunavirinae|Sertoctavirus|Escherichia virus SRT8	S	2560453	Viruses	Escherichia virus SRT8	0	0	2	0	0	0	0	0	0	0	0	0	0	0	0	0	0	0	1	0	0	0	0	0	0	0	0	0	0	0	0	0	0	0	0	0	0	0	0	0	0	0	0	0	0
root|Viruses|Duplodnaviria|Heunggongvirae|Uroviricota|Caudoviricetes|Caudovirales|Drexlerviridae|Tunavirinae|Sertoctavirus|Escherichia virus SRT8	S1	2496545	Viruses	Escherichia phage SRT8	0	0	2	0	0	0	0	0	0	0	0	0	0	0	0	0	0	0	1	0	0	0	0	0	0	0	0	0	0	0	0	0	0	0	0	0	0	0	0	0	0	0	0	0	0
root|Viruses|Duplodnaviria|Heunggongvirae|Uroviricota|Caudoviricetes|Caudovirales|Drexlerviridae|Tunavirinae|Tunavirus	G	187217	Viruses	Tunavirus	0	3	0	1	2	0	0	1	0	0	0	1	0	0	0	0	1	0	0	0	0	0	29	83	40	17	0	2	0	1	7	2	0	0	0	16	0	0	0	0	0	0	0	1	7
root|Viruses|Duplodnaviria|Heunggongvirae|Uroviricota|Caudoviricetes|Caudovirales|Drexlerviridae|Tunavirinae|Tunavirus|Escherichia virus JMPW1	S	2049887	Viruses	Escherichia virus JMPW1	0	1	0	0	0	0	0	0	0	0	0	0	0	0	0	0	0	0	0	0	0	0	0	0	0	0	0	0	0	0	0	0	0	0	0	0	0	0	0	0	0	0	0	0	0
root|Viruses|Duplodnaviria|Heunggongvirae|Uroviricota|Caudoviricetes|Caudovirales|Drexlerviridae|Tunavirinae|Tunavirus|Escherichia virus JMPW1	S1	1772219	Viruses	Escherichia phage JMPW1	0	1	0	0	0	0	0	0	0	0	0	0	0	0	0	0	0	0	0	0	0	0	0	0	0	0	0	0	0	0	0	0	0	0	0	0	0	0	0	0	0	0	0	0	0
root|Viruses|Duplodnaviria|Heunggongvirae|Uroviricota|Caudoviricetes|Caudovirales|Drexlerviridae|Tunavirinae|Tunavirus|Escherichia virus SH2	S	2734023	Viruses	Escherichia virus SH2	0	0	0	1	0	0	0	0	0	0	0	0	0	0	0	0	0	0	0	0	0	0	0	0	0	0	0	0	0	0	0	0	0	0	0	0	0	0	0	0	0	0	0	0	0
root|Viruses|Duplodnaviria|Heunggongvirae|Uroviricota|Caudoviricetes|Caudovirales|Drexlerviridae|Tunavirinae|Tunavirus|Escherichia virus SH2	S1	1983554	Viruses	Escherichia phage vB_EcoS_SH2	0	0	0	1	0	0	0	0	0	0	0	0	0	0	0	0	0	0	0	0	0	0	0	0	0	0	0	0	0	0	0	0	0	0	0	0	0	0	0	0	0	0	0	0	0
root|Viruses|Duplodnaviria|Heunggongvirae|Uroviricota|Caudoviricetes|Caudovirales|Drexlerviridae|Tunavirinae|Tunavirus|Escherichia virus T1	S	1921008	Viruses	Escherichia virus T1	0	1	0	0	0	0	0	0	0	0	0	0	0	0	0	0	0	0	0	0	0	0	0	0	0	0	0	0	0	0	0	1	0	0	0	0	0	0	0	0	0	0	0	0	0
root|Viruses|Duplodnaviria|Heunggongvirae|Uroviricota|Caudoviricetes|Caudovirales|Drexlerviridae|Tunavirinae|Tunavirus|Shigella virus 008	S	2734024	Viruses	Shigella virus 008	0	0	0	0	1	0	0	0	0	0	0	0	0	0	0	0	0	0	0	0	0	0	29	83	40	16	0	0	0	0	7	1	0	0	0	16	0	0	0	0	0	0	0	1	7
root|Viruses|Duplodnaviria|Heunggongvirae|Uroviricota|Caudoviricetes|Caudovirales|Drexlerviridae|Tunavirinae|Tunavirus|Shigella virus 008	S1	2507846	Viruses	Shigella phage vB_SsoS_008	0	0	0	0	1	0	0	0	0	0	0	0	0	0	0	0	0	0	0	0	0	0	29	83	40	16	0	0	0	0	7	1	0	0	0	16	0	0	0	0	0	0	0	1	7
root|Viruses|Duplodnaviria|Heunggongvirae|Uroviricota|Caudoviricetes|Caudovirales|Drexlerviridae|Tunavirinae|Tunavirus|Shigella virus PSf2	S	1921005	Viruses	Shigella virus PSf2	0	0	0	0	0	0	0	0	0	0	0	0	0	0	0	0	0	0	0	0	0	0	0	0	0	0	0	0	0	0	0	0	0	0	0	0	0	0	0	0	0	0	0	0	0
root|Viruses|Duplodnaviria|Heunggongvirae|Uroviricota|Caudoviricetes|Caudovirales|Drexlerviridae|Tunavirinae|Tunavirus|Shigella virus PSf2	S1	1572702	Viruses	Shigella phage pSf-2	0	0	0	0	0	0	0	0	0	0	0	0	0	0	0	0	0	0	0	0	0	0	0	0	0	0	0	0	0	0	0	0	0	0	0	0	0	0	0	0	0	0	0	0	0
root|Viruses|Duplodnaviria|Heunggongvirae|Uroviricota|Caudoviricetes|Caudovirales|Drexlerviridae|Tunavirinae|Tunavirus|Shigella virus SH6	S	2734027	Viruses	Shigella virus SH6	0	1	0	0	0	0	0	0	0	0	0	0	0	0	0	0	0	0	0	0	0	0	0	0	0	0	0	1	0	0	0	0	0	0	0	0	0	0	0	0	0	0	0	0	0
root|Viruses|Duplodnaviria|Heunggongvirae|Uroviricota|Caudoviricetes|Caudovirales|Drexlerviridae|Tunavirinae|Tunavirus|Shigella virus SH6	S1	1913048	Viruses	Shigella phage SH6	0	1	0	0	0	0	0	0	0	0	0	0	0	0	0	0	0	0	0	0	0	0	0	0	0	0	0	1	0	0	0	0	0	0	0	0	0	0	0	0	0	0	0	0	0
root|Viruses|Duplodnaviria|Heunggongvirae|Uroviricota|Caudoviricetes|Caudovirales|Drexlerviridae|Tunavirinae|Tunavirus|Shigella virus Shfl1	S	1002724	Viruses	Shigella virus Shfl1	0	0	0	0	0	0	0	0	0	0	0	1	0	0	0	0	0	0	0	0	0	0	0	0	0	0	0	0	0	1	0	0	0	0	0	0	0	0	0	0	0	0	0	0	0
root|Viruses|Duplodnaviria|Heunggongvirae|Uroviricota|Caudoviricetes|Caudovirales|Drexlerviridae|Tunavirinae|unclassified Tunavirinae	F2	2419759	Viruses	unclassified Tunavirinae	1	0	1	0	2	3	0	0	0	1	0	0	0	0	1	0	0	0	0	0	0	0	0	0	0	0	0	0	0	0	0	0	0	0	0	0	0	0	0	0	0	0	0	0	0
root|Viruses|Duplodnaviria|Heunggongvirae|Uroviricota|Caudoviricetes|Caudovirales|Drexlerviridae|Tunavirinae|unclassified Tunavirinae|Cronobacter phage CS01	S	2496544	Viruses	Cronobacter phage CS01	0	0	0	0	2	0	0	0	0	1	0	0	0	0	1	0	0	0	0	0	0	0	0	0	0	0	0	0	0	0	0	0	0	0	0	0	0	0	0	0	0	0	0	0	0
root|Viruses|Duplodnaviria|Heunggongvirae|Uroviricota|Caudoviricetes|Caudovirales|Drexlerviridae|Tunavirinae|unclassified Tunavirinae|Enterobacteria phage vB_EcoS_IME347	S	2496546	Viruses	Enterobacteria phage vB_EcoS_IME347	1	0	1	0	0	3	0	0	0	0	0	0	0	0	0	0	0	0	0	0	0	0	0	0	0	0	0	0	0	0	0	0	0	0	0	0	0	0	0	0	0	0	0	0	0
root|Viruses|Duplodnaviria|Heunggongvirae|Uroviricota|Caudoviricetes|Caudovirales|Drexlerviridae|Webervirus	G	1920860	Viruses	Webervirus	3	2	4	4	3	1	3	1	0	1	3	2	2	1	0	0	2	7	3	40	0	2	0	3	0	0	0	1	0	2	0	4	1	1	0	1	2	0	0	1	0	2	0	0	0
root|Viruses|Duplodnaviria|Heunggongvirae|Uroviricota|Caudoviricetes|Caudovirales|Drexlerviridae|Webervirus|Enterobacter virus F20	S	1095076	Viruses	Enterobacter virus F20	0	0	1	0	0	0	0	0	0	0	1	0	0	0	0	0	0	2	0	0	0	0	0	0	0	0	0	0	0	0	0	0	0	0	0	0	0	0	0	0	0	0	0	0	0
root|Viruses|Duplodnaviria|Heunggongvirae|Uroviricota|Caudoviricetes|Caudovirales|Drexlerviridae|Webervirus|Klebsiella virus 1513	S	1920862	Viruses	Klebsiella virus 1513	0	0	0	0	0	0	0	0	0	0	0	0	0	0	0	0	0	0	0	0	0	0	0	0	0	0	0	0	0	0	0	1	0	0	0	0	0	0	0	0	0	0	0	0	0
root|Viruses|Duplodnaviria|Heunggongvirae|Uroviricota|Caudoviricetes|Caudovirales|Drexlerviridae|Webervirus|Klebsiella virus 1513|Klebsiella phage 1513	S1	1610829	Viruses	Klebsiella phage 1513	0	0	0	0	0	0	0	0	0	0	0	0	0	0	0	0	0	0	0	0	0	0	0	0	0	0	0	0	0	0	0	1	0	0	0	0	0	0	0	0	0	0	0	0	0
root|Viruses|Duplodnaviria|Heunggongvirae|Uroviricota|Caudoviricetes|Caudovirales|Drexlerviridae|Webervirus|Klebsiella virus KpCol1	S	2734034	Viruses	Klebsiella virus KpCol1	0	1	0	0	0	0	0	0	0	0	0	0	0	0	0	0	0	0	0	0	0	0	0	0	0	0	0	0	0	0	0	0	0	0	0	0	0	0	0	0	0	0	0	0	0
root|Viruses|Duplodnaviria|Heunggongvirae|Uroviricota|Caudoviricetes|Caudovirales|Drexlerviridae|Webervirus|Klebsiella virus KpCol1|Klebsiella virus GML-KpCol1	S1	2060945	Viruses	Klebsiella virus GML-KpCol1	0	1	0	0	0	0	0	0	0	0	0	0	0	0	0	0	0	0	0	0	0	0	0	0	0	0	0	0	0	0	0	0	0	0	0	0	0	0	0	0	0	0	0	0	0
root|Viruses|Duplodnaviria|Heunggongvirae|Uroviricota|Caudoviricetes|Caudovirales|Drexlerviridae|Webervirus|Klebsiella virus KpV522	S	2734037	Viruses	Klebsiella virus KpV522	1	0	0	0	0	0	0	0	0	0	0	0	0	0	0	0	0	0	0	0	0	1	0	0	0	0	0	0	0	0	0	0	0	0	0	0	0	0	0	0	0	0	0	0	0
root|Viruses|Duplodnaviria|Heunggongvirae|Uroviricota|Caudoviricetes|Caudovirales|Drexlerviridae|Webervirus|Klebsiella virus KpV522|Klebsiella phage vB_KpnS_KpV522	S1	1912320	Viruses	Klebsiella phage vB_KpnS_KpV522	1	0	0	0	0	0	0	0	0	0	0	0	0	0	0	0	0	0	0	0	0	1	0	0	0	0	0	0	0	0	0	0	0	0	0	0	0	0	0	0	0	0	0	0	0
root|Viruses|Duplodnaviria|Heunggongvirae|Uroviricota|Caudoviricetes|Caudovirales|Drexlerviridae|Webervirus|Klebsiella virus NJR15	S	2734039	Viruses	Klebsiella virus NJR15	0	0	0	0	0	0	0	0	0	0	0	0	0	0	0	0	1	0	0	1	0	0	0	0	0	0	0	0	0	0	0	1	1	1	0	1	1	0	0	0	0	1	0	0	0
root|Viruses|Duplodnaviria|Heunggongvirae|Uroviricota|Caudoviricetes|Caudovirales|Drexlerviridae|Webervirus|Klebsiella virus NJR15|Klebsiella phage NJR15	S1	2301687	Viruses	Klebsiella phage NJR15	0	0	0	0	0	0	0	0	0	0	0	0	0	0	0	0	1	0	0	1	0	0	0	0	0	0	0	0	0	0	0	1	1	1	0	1	1	0	0	0	0	1	0	0	0
root|Viruses|Duplodnaviria|Heunggongvirae|Uroviricota|Caudoviricetes|Caudovirales|Drexlerviridae|Webervirus|Klebsiella virus NJS2	S	2734041	Viruses	Klebsiella virus NJS2	0	0	1	0	0	0	0	0	0	0	0	0	0	0	0	0	0	0	0	0	0	0	0	0	0	0	0	0	0	0	0	0	0	0	0	0	0	0	0	0	0	0	0	0	0
root|Viruses|Duplodnaviria|Heunggongvirae|Uroviricota|Caudoviricetes|Caudovirales|Drexlerviridae|Webervirus|Klebsiella virus NJS2|Klebsiella phage NJS2	S1	2301688	Viruses	Klebsiella phage NJS2	0	0	1	0	0	0	0	0	0	0	0	0	0	0	0	0	0	0	0	0	0	0	0	0	0	0	0	0	0	0	0	0	0	0	0	0	0	0	0	0	0	0	0	0	0
root|Viruses|Duplodnaviria|Heunggongvirae|Uroviricota|Caudoviricetes|Caudovirales|Drexlerviridae|Webervirus|Klebsiella virus TAH8	S	2734042	Viruses	Klebsiella virus TAH8	0	0	0	0	1	0	0	0	0	0	1	0	0	0	0	0	0	0	0	0	0	0	0	0	0	0	0	0	0	0	0	0	0	0	0	0	0	0	0	0	0	0	0	0	0
root|Viruses|Duplodnaviria|Heunggongvirae|Uroviricota|Caudoviricetes|Caudovirales|Drexlerviridae|Webervirus|Klebsiella virus TAH8|Klebsiella phage TAH8	S1	2301690	Viruses	Klebsiella phage TAH8	0	0	0	0	1	0	0	0	0	0	1	0	0	0	0	0	0	0	0	0	0	0	0	0	0	0	0	0	0	0	0	0	0	0	0	0	0	0	0	0	0	0	0	0	0
root|Viruses|Duplodnaviria|Heunggongvirae|Uroviricota|Caudoviricetes|Caudovirales|Drexlerviridae|Webervirus|Klebsiella virus TSK1	S	2734043	Viruses	Klebsiella virus TSK1	0	0	0	0	0	0	0	0	0	0	0	0	0	0	0	0	0	0	1	0	0	0	0	0	0	0	0	0	0	0	0	0	0	0	0	0	0	0	0	0	0	0	0	0	0
root|Viruses|Duplodnaviria|Heunggongvirae|Uroviricota|Caudoviricetes|Caudovirales|Drexlerviridae|Webervirus|Klebsiella virus TSK1|Klebsiella phage TSK1	S1	2301532	Viruses	Klebsiella phage TSK1	0	0	0	0	0	0	0	0	0	0	0	0	0	0	0	0	0	0	1	0	0	0	0	0	0	0	0	0	0	0	0	0	0	0	0	0	0	0	0	0	0	0	0	0	0
root|Viruses|Duplodnaviria|Heunggongvirae|Uroviricota|Caudoviricetes|Caudovirales|Drexlerviridae|Webervirus|unclassified Webervirus	G1	2026949	Viruses	unclassified Webervirus	2	1	1	2	1	0	2	0	0	1	1	2	2	0	0	0	0	0	2	0	0	0	0	1	0	0	0	0	0	2	0	0	0	0	0	0	0	0	0	0	0	0	0	0	0
root|Viruses|Duplodnaviria|Heunggongvirae|Uroviricota|Caudoviricetes|Caudovirales|Drexlerviridae|Webervirus|unclassified Webervirus|Klebsiella phage JY917	S	2099585	Viruses	Klebsiella phage JY917	1	0	0	0	0	0	0	0	0	0	0	0	0	0	0	0	0	0	0	0	0	0	0	0	0	0	0	0	0	0	0	0	0	0	0	0	0	0	0	0	0	0	0	0	0
root|Viruses|Duplodnaviria|Heunggongvirae|Uroviricota|Caudoviricetes|Caudovirales|Drexlerviridae|Webervirus|unclassified Webervirus|Klebsiella phage KL	S	2608376	Viruses	Klebsiella phage KL	0	0	1	2	1	0	0	0	0	1	1	2	0	0	0	0	0	0	0	0	0	0	0	1	0	0	0	0	0	0	0	0	0	0	0	0	0	0	0	0	0	0	0	0	0
root|Viruses|Duplodnaviria|Heunggongvirae|Uroviricota|Caudoviricetes|Caudovirales|Drexlerviridae|Webervirus|unclassified Webervirus|Klebsiella phage KP1801	S	2678563	Viruses	Klebsiella phage KP1801	0	0	0	0	0	0	1	0	0	0	0	0	0	0	0	0	0	0	0	0	0	0	0	0	0	0	0	0	0	0	0	0	0	0	0	0	0	0	0	0	0	0	0	0	0
root|Viruses|Duplodnaviria|Heunggongvirae|Uroviricota|Caudoviricetes|Caudovirales|Drexlerviridae|Webervirus|unclassified Webervirus|Klebsiella phage PhiKpNIH-2	S	2689114	Viruses	Klebsiella phage PhiKpNIH-2	0	1	0	0	0	0	0	0	0	0	0	0	0	0	0	0	0	0	0	0	0	0	0	0	0	0	0	0	0	0	0	0	0	0	0	0	0	0	0	0	0	0	0	0	0
root|Viruses|Duplodnaviria|Heunggongvirae|Uroviricota|Caudoviricetes|Caudovirales|Drexlerviridae|Webervirus|unclassified Webervirus|Klebsiella phage Sin4	S	2580406	Viruses	Klebsiella phage Sin4	1	0	0	0	0	0	1	0	0	0	0	0	2	0	0	0	0	0	0	0	0	0	0	0	0	0	0	0	0	2	0	0	0	0	0	0	0	0	0	0	0	0	0	0	0
root|Viruses|Duplodnaviria|Heunggongvirae|Uroviricota|Caudoviricetes|Caudovirales|Drexlerviridae|Webervirus|unclassified Webervirus|Klebsiella phage vB_KpnS_FZ10	S	2530029	Viruses	Klebsiella phage vB_KpnS_FZ10	0	0	0	0	0	0	0	0	0	0	0	0	0	0	0	0	0	0	1	0	0	0	0	0	0	0	0	0	0	0	0	0	0	0	0	0	0	0	0	0	0	0	0	0	0
root|Viruses|Duplodnaviria|Heunggongvirae|Uroviricota|Caudoviricetes|Caudovirales|Herelleviridae	F	2560065	Viruses	Herelleviridae	128	176	133	102	134	104	111	113	58	77	138	1635	57	165	239	32035	88	131	163	39	8	275	49	75	54	51	1191	105	76	52	484	196	162	208	260	86	110	18	355	42	107	213	42	16	32
root|Viruses|Duplodnaviria|Heunggongvirae|Uroviricota|Caudoviricetes|Caudovirales|Herelleviridae|Bastillevirinae	F1	2560070	Viruses	Bastillevirinae	34	49	33	33	49	33	39	40	13	29	43	28	19	43	16	21	28	50	102	19	2	13	16	24	5	10	17	29	19	12	9	63	30	70	8	6	33	7	5	23	6	95	5	4	10
root|Viruses|Duplodnaviria|Heunggongvirae|Uroviricota|Caudoviricetes|Caudovirales|Herelleviridae|Bastillevirinae|Agatevirus	G	1910931	Viruses	Agatevirus	1	3	6	2	8	2	1	2	2	1	1	0	3	2	4	3	1	1	1	0	0	0	0	0	0	2	0	5	2	2	0	2	2	0	0	0	0	0	1	0	0	0	0	0	0
root|Viruses|Duplodnaviria|Heunggongvirae|Uroviricota|Caudoviricetes|Caudovirales|Herelleviridae|Bastillevirinae|Agatevirus|Bacillus virus Agate	S	1910935	Viruses	Bacillus virus Agate	0	2	2	0	6	2	1	0	1	1	0	0	1	1	3	1	1	1	0	0	0	0	0	0	0	0	0	2	0	2	0	2	0	0	0	0	0	0	1	0	0	0	0	0	0
root|Viruses|Duplodnaviria|Heunggongvirae|Uroviricota|Caudoviricetes|Caudovirales|Herelleviridae|Bastillevirinae|Agatevirus|Bacillus virus Agate	S1	1204533	Viruses	Bacillus phage phiAGATE	0	2	2	0	6	2	1	0	1	1	0	0	1	1	3	1	1	1	0	0	0	0	0	0	0	0	0	2	0	2	0	2	0	0	0	0	0	0	1	0	0	0	0	0	0
root|Viruses|Duplodnaviria|Heunggongvirae|Uroviricota|Caudoviricetes|Caudovirales|Herelleviridae|Bastillevirinae|Agatevirus|Bacillus virus Bobb	S	1910936	Viruses	Bacillus virus Bobb	1	0	1	1	1	0	0	0	0	0	0	0	0	0	1	1	0	0	1	0	0	0	0	0	0	0	0	1	0	0	0	0	0	0	0	0	0	0	0	0	0	0	0	0	0
root|Viruses|Duplodnaviria|Heunggongvirae|Uroviricota|Caudoviricetes|Caudovirales|Herelleviridae|Bastillevirinae|Agatevirus|Bacillus virus Bobb	S1	1527469	Viruses	Bacillus phage Bobb	1	0	1	1	1	0	0	0	0	0	0	0	0	0	1	1	0	0	1	0	0	0	0	0	0	0	0	1	0	0	0	0	0	0	0	0	0	0	0	0	0	0	0	0	0
root|Viruses|Duplodnaviria|Heunggongvirae|Uroviricota|Caudoviricetes|Caudovirales|Herelleviridae|Bastillevirinae|Agatevirus|Bacillus virus Bp8pC	S	1910937	Viruses	Bacillus virus Bp8pC	0	0	0	0	1	0	0	2	1	0	1	0	0	1	0	0	0	0	0	0	0	0	0	0	0	1	0	1	0	0	0	0	2	0	0	0	0	0	0	0	0	0	0	0	0
root|Viruses|Duplodnaviria|Heunggongvirae|Uroviricota|Caudoviricetes|Caudovirales|Herelleviridae|Bastillevirinae|Bacillus virus Mater	S	2560332	Viruses	Bacillus virus Mater	1	1	0	2	1	0	1	2	0	1	0	0	0	2	0	0	0	1	0	0	0	0	3	0	0	0	1	0	0	1	0	1	0	0	0	0	0	6	0	2	0	1	0	0	0
root|Viruses|Duplodnaviria|Heunggongvirae|Uroviricota|Caudoviricetes|Caudovirales|Herelleviridae|Bastillevirinae|Bacillus virus Mater|Bacillus phage Mater	S1	1540090	Viruses	Bacillus phage Mater	1	1	0	2	1	0	1	2	0	1	0	0	0	2	0	0	0	1	0	0	0	0	3	0	0	0	1	0	0	1	0	1	0	0	0	0	0	6	0	2	0	1	0	0	0
root|Viruses|Duplodnaviria|Heunggongvirae|Uroviricota|Caudoviricetes|Caudovirales|Herelleviridae|Bastillevirinae|Bacillus virus Moonbeam	S	2560334	Viruses	Bacillus virus Moonbeam	2	1	1	4	5	0	4	1	1	1	2	3	0	0	2	1	3	2	0	0	0	0	0	0	0	0	1	2	1	0	0	0	0	0	0	0	0	0	0	0	0	0	1	0	0
root|Viruses|Duplodnaviria|Heunggongvirae|Uroviricota|Caudoviricetes|Caudovirales|Herelleviridae|Bastillevirinae|Bacillus virus Moonbeam|Bacillus phage Moonbeam	S1	1540091	Viruses	Bacillus phage Moonbeam	2	1	1	4	5	0	4	1	1	1	2	3	0	0	2	1	3	2	0	0	0	0	0	0	0	0	1	2	1	0	0	0	0	0	0	0	0	0	0	0	0	0	1	0	0
root|Viruses|Duplodnaviria|Heunggongvirae|Uroviricota|Caudoviricetes|Caudovirales|Herelleviridae|Bastillevirinae|Bacillus virus SIOphi	S	2560335	Viruses	Bacillus virus SIOphi	2	4	1	2	0	1	2	5	1	1	6	2	1	0	1	0	1	1	63	0	0	1	3	6	0	0	2	5	4	1	1	1	0	3	2	1	6	0	0	0	3	3	0	1	1
root|Viruses|Duplodnaviria|Heunggongvirae|Uroviricota|Caudoviricetes|Caudovirales|Herelleviridae|Bastillevirinae|Bacillus virus SIOphi|Bacillus phage SIOphi	S1	1285382	Viruses	Bacillus phage SIOphi	2	4	1	2	0	1	2	5	1	1	6	2	1	0	1	0	1	1	63	0	0	1	3	6	0	0	2	5	4	1	1	1	0	3	2	1	6	0	0	0	3	3	0	1	1
root|Viruses|Duplodnaviria|Heunggongvirae|Uroviricota|Caudoviricetes|Caudovirales|Herelleviridae|Bastillevirinae|Bastillevirus	G	1918010	Viruses	Bastillevirus	4	0	1	3	4	5	3	4	1	6	5	1	0	1	0	0	4	4	0	0	0	1	5	9	1	0	1	1	1	0	4	1	3	10	2	0	5	0	2	0	0	38	0	0	0
root|Viruses|Duplodnaviria|Heunggongvirae|Uroviricota|Caudoviricetes|Caudovirales|Herelleviridae|Bastillevirinae|Bastillevirus|Bacillus virus Bastille	S	1918011	Viruses	Bacillus virus Bastille	0	0	0	0	0	0	0	1	0	0	0	0	0	0	0	0	0	0	0	0	0	1	0	0	0	0	0	0	0	0	0	0	0	0	0	0	0	0	0	0	0	1	0	0	0
root|Viruses|Duplodnaviria|Heunggongvirae|Uroviricota|Caudoviricetes|Caudovirales|Herelleviridae|Bastillevirinae|Bastillevirus|Bacillus virus Bastille	S1	57477	Viruses	Bacillus phage Bastille	0	0	0	0	0	0	0	1	0	0	0	0	0	0	0	0	0	0	0	0	0	1	0	0	0	0	0	0	0	0	0	0	0	0	0	0	0	0	0	0	0	1	0	0	0
root|Viruses|Duplodnaviria|Heunggongvirae|Uroviricota|Caudoviricetes|Caudovirales|Herelleviridae|Bastillevirinae|Bastillevirus|Bacillus virus CAM003	S	1918012	Viruses	Bacillus virus CAM003	0	0	0	1	0	2	1	0	0	4	0	0	0	0	0	0	0	0	0	0	0	0	0	1	1	0	0	0	1	0	0	0	0	0	0	0	0	0	0	0	0	0	0	0	0
root|Viruses|Duplodnaviria|Heunggongvirae|Uroviricota|Caudoviricetes|Caudovirales|Herelleviridae|Bastillevirinae|Bastillevirus|Bacillus virus CAM003	S1	1486657	Viruses	Bacillus phage CAM003	0	0	0	1	0	2	1	0	0	4	0	0	0	0	0	0	0	0	0	0	0	0	0	1	1	0	0	0	1	0	0	0	0	0	0	0	0	0	0	0	0	0	0	0	0
root|Viruses|Duplodnaviria|Heunggongvirae|Uroviricota|Caudoviricetes|Caudovirales|Herelleviridae|Bastillevirinae|Bastillevirus|Bacillus virus Evoli	S	2560330	Viruses	Bacillus virus Evoli	0	0	0	1	1	2	0	0	0	0	0	0	0	0	0	0	0	1	0	0	0	0	0	0	0	0	0	0	0	0	0	0	0	0	0	0	0	0	0	0	0	0	0	0	0
root|Viruses|Duplodnaviria|Heunggongvirae|Uroviricota|Caudoviricetes|Caudovirales|Herelleviridae|Bastillevirinae|Bastillevirus|Bacillus virus Evoli	S1	1486658	Viruses	Bacillus phage Evoli	0	0	0	1	1	2	0	0	0	0	0	0	0	0	0	0	0	1	0	0	0	0	0	0	0	0	0	0	0	0	0	0	0	0	0	0	0	0	0	0	0	0	0	0	0
root|Viruses|Duplodnaviria|Heunggongvirae|Uroviricota|Caudoviricetes|Caudovirales|Herelleviridae|Bastillevirinae|Bastillevirus|Bacillus virus HoodyT	S	2560331	Viruses	Bacillus virus HoodyT	0	0	0	0	0	0	2	0	0	0	0	0	0	0	0	0	0	0	0	0	0	0	0	0	0	0	0	0	0	0	4	1	1	10	0	0	4	0	2	0	0	0	0	0	0
root|Viruses|Duplodnaviria|Heunggongvirae|Uroviricota|Caudoviricetes|Caudovirales|Herelleviridae|Bastillevirinae|Bastillevirus|Bacillus virus HoodyT	S1	1486660	Viruses	Bacillus phage Hoody T	0	0	0	0	0	0	2	0	0	0	0	0	0	0	0	0	0	0	0	0	0	0	0	0	0	0	0	0	0	0	4	1	1	10	0	0	4	0	2	0	0	0	0	0	0
root|Viruses|Duplodnaviria|Heunggongvirae|Uroviricota|Caudoviricetes|Caudovirales|Herelleviridae|Bastillevirinae|Bequatrovirus	G	1917990	Viruses	Bequatrovirus	3	4	3	3	4	3	5	3	1	7	2	5	1	12	2	4	4	8	2	1	1	3	3	3	0	3	2	1	2	2	1	3	0	0	0	0	2	1	1	1	1	2	0	0	1
root|Viruses|Duplodnaviria|Heunggongvirae|Uroviricota|Caudoviricetes|Caudovirales|Herelleviridae|Bastillevirinae|Bequatrovirus|Bacillus virus AvesoBmore	S	1984785	Viruses	Bacillus virus AvesoBmore	0	0	0	0	0	1	0	0	0	0	0	1	0	8	0	0	0	0	0	1	0	0	0	0	0	0	1	0	0	0	0	0	0	0	0	0	1	0	1	0	0	1	0	0	0
root|Viruses|Duplodnaviria|Heunggongvirae|Uroviricota|Caudoviricetes|Caudovirales|Herelleviridae|Bastillevirinae|Bequatrovirus|Bacillus virus AvesoBmore	S1	1698451	Viruses	Bacillus phage AvesoBmore	0	0	0	0	0	1	0	0	0	0	0	1	0	8	0	0	0	0	0	1	0	0	0	0	0	0	1	0	0	0	0	0	0	0	0	0	1	0	1	0	0	1	0	0	0
root|Viruses|Duplodnaviria|Heunggongvirae|Uroviricota|Caudoviricetes|Caudovirales|Herelleviridae|Bastillevirinae|Bequatrovirus|Bacillus virus B4	S	1918005	Viruses	Bacillus virus B4	0	0	1	1	1	0	0	0	1	1	1	0	1	0	0	1	0	1	0	0	0	0	0	0	0	0	0	0	2	1	1	0	0	0	0	0	0	0	0	0	0	0	0	0	1
root|Viruses|Duplodnaviria|Heunggongvirae|Uroviricota|Caudoviricetes|Caudovirales|Herelleviridae|Bastillevirinae|Bequatrovirus|Bacillus virus B4	S1	1141133	Viruses	Bacillus phage B4	0	0	1	1	1	0	0	0	1	1	1	0	1	0	0	1	0	1	0	0	0	0	0	0	0	0	0	0	2	1	1	0	0	0	0	0	0	0	0	0	0	0	0	0	1
root|Viruses|Duplodnaviria|Heunggongvirae|Uroviricota|Caudoviricetes|Caudovirales|Herelleviridae|Bastillevirinae|Bequatrovirus|Bacillus virus Bigbertha	S	1918006	Viruses	Bacillus virus Bigbertha	0	0	0	0	0	0	1	0	0	0	1	0	0	0	0	0	0	0	0	0	0	0	0	0	0	0	0	0	0	0	0	0	0	0	0	0	0	0	0	0	0	0	0	0	0
root|Viruses|Duplodnaviria|Heunggongvirae|Uroviricota|Caudoviricetes|Caudovirales|Herelleviridae|Bastillevirinae|Bequatrovirus|Bacillus virus Bigbertha	S1	1406781	Viruses	Bacillus phage BigBertha	0	0	0	0	0	0	1	0	0	0	1	0	0	0	0	0	0	0	0	0	0	0	0	0	0	0	0	0	0	0	0	0	0	0	0	0	0	0	0	0	0	0	0	0	0
root|Viruses|Duplodnaviria|Heunggongvirae|Uroviricota|Caudoviricetes|Caudovirales|Herelleviridae|Bastillevirinae|Bequatrovirus|Bacillus virus Riley	S	1918007	Viruses	Bacillus virus Riley	0	1	1	0	0	1	0	0	0	2	0	1	0	0	0	0	2	1	1	0	0	0	0	0	0	0	0	0	0	0	0	0	0	0	0	0	0	0	0	0	0	0	0	0	0
root|Viruses|Duplodnaviria|Heunggongvirae|Uroviricota|Caudoviricetes|Caudovirales|Herelleviridae|Bastillevirinae|Bequatrovirus|Bacillus virus Riley	S1	1486662	Viruses	Bacillus phage Riley	0	1	1	0	0	1	0	0	0	2	0	1	0	0	0	0	2	1	1	0	0	0	0	0	0	0	0	0	0	0	0	0	0	0	0	0	0	0	0	0	0	0	0	0	0
root|Viruses|Duplodnaviria|Heunggongvirae|Uroviricota|Caudoviricetes|Caudovirales|Herelleviridae|Bastillevirinae|Bequatrovirus|Bacillus virus Spock	S	1918008	Viruses	Bacillus virus Spock	0	0	0	0	0	0	0	2	0	0	0	0	0	0	0	0	1	2	0	0	0	2	0	2	0	0	0	0	0	0	0	1	0	0	0	0	0	1	0	0	0	0	0	0	0
root|Viruses|Duplodnaviria|Heunggongvirae|Uroviricota|Caudoviricetes|Caudovirales|Herelleviridae|Bastillevirinae|Bequatrovirus|Bacillus virus Spock	S1	1406791	Viruses	Bacillus phage Spock	0	0	0	0	0	0	0	2	0	0	0	0	0	0	0	0	1	2	0	0	0	2	0	2	0	0	0	0	0	0	0	1	0	0	0	0	0	1	0	0	0	0	0	0	0
root|Viruses|Duplodnaviria|Heunggongvirae|Uroviricota|Caudoviricetes|Caudovirales|Herelleviridae|Bastillevirinae|Bequatrovirus|Bacillus virus Troll	S	1918009	Viruses	Bacillus virus Troll	0	0	1	0	2	0	0	0	0	1	0	0	0	1	0	0	0	0	1	0	0	0	0	0	0	0	0	0	0	0	0	0	0	0	0	0	0	0	0	0	0	0	0	0	0
root|Viruses|Duplodnaviria|Heunggongvirae|Uroviricota|Caudoviricetes|Caudovirales|Herelleviridae|Bastillevirinae|Bequatrovirus|Bacillus virus Troll	S1	1382932	Viruses	Bacillus phage Troll	0	0	1	0	2	0	0	0	0	1	0	0	0	1	0	0	0	0	1	0	0	0	0	0	0	0	0	0	0	0	0	0	0	0	0	0	0	0	0	0	0	0	0	0	0
root|Viruses|Duplodnaviria|Heunggongvirae|Uroviricota|Caudoviricetes|Caudovirales|Herelleviridae|Bastillevirinae|Bequatrovirus|unclassified Bequatrovirus	G1	2233872	Viruses	unclassified Bequatrovirus	0	1	0	0	0	0	0	0	0	0	0	1	0	0	1	3	0	2	0	0	1	0	0	0	0	0	0	0	0	0	0	1	0	0	0	0	0	0	0	0	0	0	0	0	0
root|Viruses|Duplodnaviria|Heunggongvirae|Uroviricota|Caudoviricetes|Caudovirales|Herelleviridae|Bastillevirinae|Bequatrovirus|unclassified Bequatrovirus	S	1805953	Viruses	Bacillus phage Phrodo	0	1	0	0	0	0	0	0	0	0	0	1	0	0	1	3	0	2	0	0	1	0	0	0	0	0	0	0	0	0	0	1	0	0	0	0	0	0	0	0	0	0	0	0	0
root|Viruses|Duplodnaviria|Heunggongvirae|Uroviricota|Caudoviricetes|Caudovirales|Herelleviridae|Bastillevirinae|Caeruleovirus	G	1911929	Viruses	Caeruleovirus	2	19	9	6	9	9	4	4	0	5	9	5	3	6	4	6	4	5	28	7	0	1	1	2	4	0	3	4	3	3	1	2	3	1	1	4	2	0	0	0	0	8	1	2	2
root|Viruses|Duplodnaviria|Heunggongvirae|Uroviricota|Caudoviricetes|Caudovirales|Herelleviridae|Bastillevirinae|Caeruleovirus|Bacillus virus BCP82	S	1985177	Viruses	Bacillus virus BCP82	0	2	0	0	0	0	0	1	0	0	0	0	0	1	2	0	0	0	0	0	0	0	0	0	0	0	0	1	0	0	0	1	0	0	0	0	0	0	0	0	0	0	0	2	2
root|Viruses|Duplodnaviria|Heunggongvirae|Uroviricota|Caudoviricetes|Caudovirales|Herelleviridae|Bastillevirinae|Caeruleovirus|Bacillus virus BCP82	S1	1129192	Viruses	Bacillus phage BCP8-2	0	2	0	0	0	0	0	1	0	0	0	0	0	1	2	0	0	0	0	0	0	0	0	0	0	0	0	1	0	0	0	1	0	0	0	0	0	0	0	0	0	0	0	2	2
root|Viruses|Duplodnaviria|Heunggongvirae|Uroviricota|Caudoviricetes|Caudovirales|Herelleviridae|Bastillevirinae|Caeruleovirus|Bacillus virus BM15	S	1985178	Viruses	Bacillus virus BM15	1	0	0	0	0	0	0	0	0	1	0	0	1	0	0	1	0	0	0	0	0	0	0	0	0	0	1	0	0	0	0	0	0	1	0	0	0	0	0	0	0	0	1	0	0
root|Viruses|Duplodnaviria|Heunggongvirae|Uroviricota|Caudoviricetes|Caudovirales|Herelleviridae|Bastillevirinae|Caeruleovirus|Bacillus virus Bc431	S	1985175	Viruses	Bacillus virus Bc431	0	1	0	0	0	1	0	1	0	0	2	0	0	0	0	0	0	0	21	0	0	0	0	0	4	0	0	0	0	0	0	0	0	0	0	0	0	0	0	0	0	5	0	0	0
root|Viruses|Duplodnaviria|Heunggongvirae|Uroviricota|Caudoviricetes|Caudovirales|Herelleviridae|Bastillevirinae|Caeruleovirus|Bacillus virus Bc431	S1	1195072	Viruses	Bacillus phage vB_BceM_Bc431v3	0	1	0	0	0	1	0	1	0	0	2	0	0	0	0	0	0	0	21	0	0	0	0	0	4	0	0	0	0	0	0	0	0	0	0	0	0	0	0	0	0	5	0	0	0
root|Viruses|Duplodnaviria|Heunggongvirae|Uroviricota|Caudoviricetes|Caudovirales|Herelleviridae|Bastillevirinae|Caeruleovirus|Bacillus virus Bcp1	S	1985176	Viruses	Bacillus virus Bcp1	0	9	3	0	1	2	3	0	0	0	0	0	0	0	2	2	1	4	1	1	0	0	0	0	0	0	0	0	0	0	0	0	0	0	1	0	0	0	0	0	0	0	0	0	0
root|Viruses|Duplodnaviria|Heunggongvirae|Uroviricota|Caudoviricetes|Caudovirales|Herelleviridae|Bastillevirinae|Caeruleovirus|Bacillus virus Bcp1	S1	584892	Viruses	Bacillus phage Bcp1	0	9	3	0	1	2	3	0	0	0	0	0	0	0	2	2	1	4	1	1	0	0	0	0	0	0	0	0	0	0	0	0	0	0	1	0	0	0	0	0	0	0	0	0	0
root|Viruses|Duplodnaviria|Heunggongvirae|Uroviricota|Caudoviricetes|Caudovirales|Herelleviridae|Bastillevirinae|Caeruleovirus|Bacillus virus Deepblue	S	1985179	Viruses	Bacillus virus Deepblue	0	1	3	1	0	2	0	1	0	0	0	1	0	0	0	1	0	0	1	2	0	0	1	0	0	0	0	1	0	0	0	0	3	0	0	2	1	0	0	0	0	1	0	0	0
root|Viruses|Duplodnaviria|Heunggongvirae|Uroviricota|Caudoviricetes|Caudovirales|Herelleviridae|Bastillevirinae|Caeruleovirus|Bacillus virus Deepblue	S1	1792245	Viruses	Bacillus phage Deep Blue	0	1	3	1	0	2	0	1	0	0	0	1	0	0	0	1	0	0	1	2	0	0	1	0	0	0	0	1	0	0	0	0	3	0	0	2	1	0	0	0	0	1	0	0	0
root|Viruses|Duplodnaviria|Heunggongvirae|Uroviricota|Caudoviricetes|Caudovirales|Herelleviridae|Bastillevirinae|Caeruleovirus|Bacillus virus JBP901	S	1985180	Viruses	Bacillus virus JBP901	0	0	0	2	1	2	0	0	0	0	1	0	0	0	0	0	0	0	2	4	0	0	0	0	0	0	0	1	1	0	0	0	0	0	0	2	0	0	0	0	0	0	0	0	0
root|Viruses|Duplodnaviria|Heunggongvirae|Uroviricota|Caudoviricetes|Caudovirales|Herelleviridae|Bastillevirinae|Caeruleovirus|Bacillus virus JBP901	S1	1498212	Viruses	Bacillus phage JBP901	0	0	0	2	1	2	0	0	0	0	1	0	0	0	0	0	0	0	2	4	0	0	0	0	0	0	0	1	1	0	0	0	0	0	0	2	0	0	0	0	0	0	0	0	0
root|Viruses|Duplodnaviria|Heunggongvirae|Uroviricota|Caudoviricetes|Caudovirales|Herelleviridae|Bastillevirinae|Nitunavirus	G	1921016	Viruses	Nitunavirus	3	3	1	4	0	4	1	4	0	2	3	2	3	1	2	0	2	4	1	0	0	3	0	0	0	2	1	2	0	0	0	0	1	1	0	0	1	0	0	0	1	1	0	0	1
root|Viruses|Duplodnaviria|Heunggongvirae|Uroviricota|Caudoviricetes|Caudovirales|Herelleviridae|Bastillevirinae|Nitunavirus|Bacillus virus Grass	S	1921017	Viruses	Bacillus virus Grass	1	2	0	1	0	1	0	0	0	1	2	1	1	0	1	0	1	1	1	0	0	0	0	0	0	0	0	1	0	0	0	0	0	0	0	0	0	0	0	0	0	0	0	0	0
root|Viruses|Duplodnaviria|Heunggongvirae|Uroviricota|Caudoviricetes|Caudovirales|Herelleviridae|Bastillevirinae|Nitunavirus|Bacillus virus Grass	S1	1406785	Viruses	Bacillus phage Grass	1	2	0	1	0	1	0	0	0	1	2	1	1	0	1	0	1	1	1	0	0	0	0	0	0	0	0	1	0	0	0	0	0	0	0	0	0	0	0	0	0	0	0	0	0
root|Viruses|Duplodnaviria|Heunggongvirae|Uroviricota|Caudoviricetes|Caudovirales|Herelleviridae|Bastillevirinae|Nitunavirus|Bacillus virus NIT1	S	1921018	Viruses	Bacillus virus NIT1	0	0	0	0	0	0	1	0	0	0	0	0	0	1	1	0	0	0	0	0	0	0	0	0	0	1	0	0	0	0	0	0	0	0	0	0	0	0	0	0	0	0	0	0	0
root|Viruses|Duplodnaviria|Heunggongvirae|Uroviricota|Caudoviricetes|Caudovirales|Herelleviridae|Bastillevirinae|Nitunavirus|Bacillus virus NIT1	S1	207656	Viruses	Bacillus phage phiNIT1	0	0	0	0	0	0	1	0	0	0	0	0	0	1	1	0	0	0	0	0	0	0	0	0	0	1	0	0	0	0	0	0	0	0	0	0	0	0	0	0	0	0	0	0	0
root|Viruses|Duplodnaviria|Heunggongvirae|Uroviricota|Caudoviricetes|Caudovirales|Herelleviridae|Bastillevirinae|Nitunavirus|Bacillus virus SPG24	S	1921019	Viruses	Bacillus virus SPG24	0	0	1	0	0	0	0	1	0	1	1	1	1	0	0	0	0	0	0	0	0	0	0	0	0	0	1	0	0	0	0	0	0	0	0	0	0	0	0	0	0	0	0	0	0
root|Viruses|Duplodnaviria|Heunggongvirae|Uroviricota|Caudoviricetes|Caudovirales|Herelleviridae|Bastillevirinae|Nitunavirus|Bacillus virus SPG24	S1	1497851	Viruses	Bacillus phage SPG24	0	0	1	0	0	0	0	1	0	1	1	1	1	0	0	0	0	0	0	0	0	0	0	0	0	0	1	0	0	0	0	0	0	0	0	0	0	0	0	0	0	0	0	0	0
root|Viruses|Duplodnaviria|Heunggongvirae|Uroviricota|Caudoviricetes|Caudovirales|Herelleviridae|Bastillevirinae|Tsarbombavirus	G	1985181	Viruses	Tsarbombavirus	5	2	1	2	2	4	4	1	0	0	1	2	1	2	0	0	1	4	0	1	0	0	1	1	0	0	2	2	0	1	1	2	0	0	0	1	0	0	0	0	0	0	1	0	0
root|Viruses|Duplodnaviria|Heunggongvirae|Uroviricota|Caudoviricetes|Caudovirales|Herelleviridae|Bastillevirinae|Tsarbombavirus|Bacillus virus BCP78	S	1985182	Viruses	Bacillus virus BCP78	0	1	1	2	0	2	2	1	0	0	0	1	0	2	0	0	1	2	0	1	0	0	0	1	0	0	0	0	0	1	0	0	0	0	0	0	0	0	0	0	0	0	0	0	0
root|Viruses|Duplodnaviria|Heunggongvirae|Uroviricota|Caudoviricetes|Caudovirales|Herelleviridae|Bastillevirinae|Tsarbombavirus|Bacillus virus BCP78	S1	1126951	Viruses	Bacillus phage BCU4	0	0	1	0	0	0	0	0	0	0	0	0	0	0	0	0	0	0	0	1	0	0	0	0	0	0	0	0	0	0	0	0	0	0	0	0	0	0	0	0	0	0	0	0	0
root|Viruses|Duplodnaviria|Heunggongvirae|Uroviricota|Caudoviricetes|Caudovirales|Herelleviridae|Bastillevirinae|Tsarbombavirus|Bacillus virus TsarBomba	S	1985183	Viruses	Bacillus virus TsarBomba	1	1	0	0	0	2	0	0	0	0	1	1	1	0	0	0	0	2	0	0	0	0	1	0	0	0	2	2	0	0	0	1	0	0	0	0	0	0	0	0	0	0	1	0	0
root|Viruses|Duplodnaviria|Heunggongvirae|Uroviricota|Caudoviricetes|Caudovirales|Herelleviridae|Bastillevirinae|Tsarbombavirus|Bacillus virus TsarBomba	S1	1690456	Viruses	Bacillus phage TsarBomba	1	1	0	0	0	2	0	0	0	0	1	1	1	0	0	0	0	2	0	0	0	0	1	0	0	0	2	2	0	0	0	1	0	0	0	0	0	0	0	0	0	0	1	0	0
root|Viruses|Duplodnaviria|Heunggongvirae|Uroviricota|Caudoviricetes|Caudovirales|Herelleviridae|Bastillevirinae|Wphvirus	G	1922327	Viruses	Wphvirus	7	9	5	2	8	3	8	10	4	3	12	5	5	10	1	6	6	13	2	10	0	1	0	2	0	2	4	5	6	1	1	41	13	28	2	0	7	0	1	19	0	42	1	1	4
root|Viruses|Duplodnaviria|Heunggongvirae|Uroviricota|Caudoviricetes|Caudovirales|Herelleviridae|Bastillevirinae|Wphvirus|Bacillus virus BPS10C	S	2560329	Viruses	Bacillus virus BPS10C	0	1	0	0	0	0	0	3	0	0	0	0	0	0	0	0	0	2	0	0	0	0	0	0	0	0	0	0	0	0	0	0	0	0	0	0	1	0	0	0	0	0	0	0	0
root|Viruses|Duplodnaviria|Heunggongvirae|Uroviricota|Caudoviricetes|Caudovirales|Herelleviridae|Bastillevirinae|Wphvirus|Bacillus virus BPS10C	S1	1277886	Viruses	Bacillus phage BPS10C	0	1	0	0	0	0	0	3	0	0	0	0	0	0	0	0	0	2	0	0	0	0	0	0	0	0	0	0	0	0	0	0	0	0	0	0	1	0	0	0	0	0	0	0	0
root|Viruses|Duplodnaviria|Heunggongvirae|Uroviricota|Caudoviricetes|Caudovirales|Herelleviridae|Bastillevirinae|Wphvirus|Bacillus virus BPS13	S	1987727	Viruses	Bacillus virus BPS13	0	0	0	1	0	0	0	0	0	0	0	0	1	0	0	0	0	0	0	0	0	0	0	0	0	0	0	0	0	0	0	0	0	0	0	0	0	0	0	0	0	0	0	0	0
root|Viruses|Duplodnaviria|Heunggongvirae|Uroviricota|Caudoviricetes|Caudovirales|Herelleviridae|Bastillevirinae|Wphvirus|Bacillus virus BPS13	S1	1136731	Viruses	Bacillus phage BPS13	0	0	0	1	0	0	0	0	0	0	0	0	1	0	0	0	0	0	0	0	0	0	0	0	0	0	0	0	0	0	0	0	0	0	0	0	0	0	0	0	0	0	0	0	0
root|Viruses|Duplodnaviria|Heunggongvirae|Uroviricota|Caudoviricetes|Caudovirales|Herelleviridae|Bastillevirinae|Wphvirus|Bacillus virus Hakuna	S	1987729	Viruses	Bacillus virus Hakuna	0	0	1	0	0	0	0	0	2	0	0	0	0	0	0	0	0	2	0	0	0	0	0	0	0	0	0	0	0	0	0	0	0	0	0	0	0	0	0	0	0	0	0	0	0
root|Viruses|Duplodnaviria|Heunggongvirae|Uroviricota|Caudoviricetes|Caudovirales|Herelleviridae|Bastillevirinae|Wphvirus|Bacillus virus Hakuna	S1	1486659	Viruses	Bacillus phage Hakuna	0	0	1	0	0	0	0	0	2	0	0	0	0	0	0	0	0	2	0	0	0	0	0	0	0	0	0	0	0	0	0	0	0	0	0	0	0	0	0	0	0	0	0	0	0
root|Viruses|Duplodnaviria|Heunggongvirae|Uroviricota|Caudoviricetes|Caudovirales|Herelleviridae|Bastillevirinae|Wphvirus|Bacillus virus Megatron	S	1987728	Viruses	Bacillus virus Megatron	0	1	0	0	0	0	0	0	0	0	0	0	0	0	0	1	0	0	0	0	0	0	0	0	0	0	0	0	0	0	0	0	0	0	0	0	0	0	0	0	0	0	0	0	0
root|Viruses|Duplodnaviria|Heunggongvirae|Uroviricota|Caudoviricetes|Caudovirales|Herelleviridae|Bastillevirinae|Wphvirus|Bacillus virus Megatron	S1	1690431	Viruses	Bacillus phage Eyuki	0	1	0	0	0	0	0	0	0	0	0	0	0	0	0	1	0	0	0	0	0	0	0	0	0	0	0	0	0	0	0	0	0	0	0	0	0	0	0	0	0	0	0	0	0
root|Viruses|Duplodnaviria|Heunggongvirae|Uroviricota|Caudoviricetes|Caudovirales|Herelleviridae|Bastillevirinae|Wphvirus|Bacillus virus WPh	S	1922328	Viruses	Bacillus virus WPh	3	1	1	0	3	0	4	4	1	0	6	2	3	1	0	0	3	1	1	4	0	1	0	0	0	0	0	1	2	0	0	7	4	4	0	0	1	0	0	2	0	0	0	0	0
root|Viruses|Duplodnaviria|Heunggongvirae|Uroviricota|Caudoviricetes|Caudovirales|Herelleviridae|Bastillevirinae|Wphvirus|Bacillus virus WPh	S1	764595	Viruses	Bacillus phage W.Ph.	3	1	1	0	3	0	4	4	1	0	6	2	3	1	0	0	3	1	1	4	0	1	0	0	0	0	0	1	2	0	0	7	4	4	0	0	1	0	0	2	0	0	0	0	0
root|Viruses|Duplodnaviria|Heunggongvirae|Uroviricota|Caudoviricetes|Caudovirales|Herelleviridae|Bastillevirinae|Wphvirus|unclassified Wphvirus	G1	2175867	Viruses	unclassified Wphvirus	1	5	3	0	2	3	1	3	1	3	2	1	1	6	0	2	1	2	1	4	0	0	0	1	0	2	2	2	3	0	0	31	9	24	1	0	2	0	0	13	0	0	1	1	0
root|Viruses|Duplodnaviria|Heunggongvirae|Uroviricota|Caudoviricetes|Caudovirales|Herelleviridae|Bastillevirinae|Wphvirus|unclassified Wphvirus	S	1805948	Viruses	Bacillus phage DIGNKC	1	2	1	0	0	1	1	1	0	0	1	1	0	1	0	0	1	2	1	0	0	0	0	1	0	1	0	2	1	0	0	0	0	0	0	0	0	0	0	0	0	0	1	0	0
root|Viruses|Duplodnaviria|Heunggongvirae|Uroviricota|Caudoviricetes|Caudovirales|Herelleviridae|Bastillevirinae|Wphvirus|unclassified Wphvirus	S	1805951	Viruses	Bacillus phage Nigalana	0	0	0	0	0	0	0	0	0	0	0	0	0	1	0	0	0	0	0	0	0	0	0	0	0	0	0	0	0	0	0	0	0	0	0	0	0	0	0	0	0	0	0	1	0
root|Viruses|Duplodnaviria|Heunggongvirae|Uroviricota|Caudoviricetes|Caudovirales|Herelleviridae|Bastillevirinae|Wphvirus|unclassified Wphvirus	S	1805952	Viruses	Bacillus phage NotTheCreek	0	0	0	0	0	0	0	0	0	0	0	0	0	0	0	0	0	0	0	0	0	0	0	0	0	0	0	0	0	0	0	0	0	0	1	0	0	0	0	0	0	0	0	0	0
root|Viruses|Duplodnaviria|Heunggongvirae|Uroviricota|Caudoviricetes|Caudovirales|Herelleviridae|Bastillevirinae|Wphvirus|unclassified Wphvirus	S	1805954	Viruses	Bacillus phage SageFayge	0	0	0	0	0	0	0	1	0	0	0	0	0	0	0	0	0	0	0	3	0	0	0	0	0	0	0	0	0	0	0	0	0	0	0	0	0	0	0	10	0	0	0	0	0
root|Viruses|Duplodnaviria|Heunggongvirae|Uroviricota|Caudoviricetes|Caudovirales|Herelleviridae|Bastillevirinae|Wphvirus|unclassified Wphvirus	S	1805956	Viruses	Bacillus phage Zuko	0	1	0	0	0	0	0	0	0	0	0	0	0	0	0	0	0	0	0	0	0	0	0	0	0	1	0	0	0	0	0	0	0	0	0	0	0	0	0	0	0	0	0	0	0
root|Viruses|Duplodnaviria|Heunggongvirae|Uroviricota|Caudoviricetes|Caudovirales|Herelleviridae|Bastillevirinae|Wphvirus|unclassified Wphvirus	S	1837830	Viruses	Bacillus phage SalinJah	0	0	1	0	0	2	0	0	1	3	1	0	1	0	0	1	0	0	0	0	0	0	0	0	0	0	2	0	1	0	0	0	0	0	0	0	0	0	0	0	0	0	0	0	0
root|Viruses|Duplodnaviria|Heunggongvirae|Uroviricota|Caudoviricetes|Caudovirales|Herelleviridae|Bastillevirinae|Wphvirus|unclassified Wphvirus	S	1852564	Viruses	Bacillus phage Belinda	0	1	1	0	0	0	0	0	0	0	0	0	0	0	0	1	0	0	0	0	0	0	0	0	0	0	0	0	0	0	0	0	0	0	0	0	0	0	0	0	0	0	0	0	0
root|Viruses|Duplodnaviria|Heunggongvirae|Uroviricota|Caudoviricetes|Caudovirales|Herelleviridae|Bastillevirinae|Wphvirus|unclassified Wphvirus	S	1873998	Viruses	Bacillus phage Kida	0	0	0	0	0	0	0	0	0	0	0	0	0	3	0	0	0	0	0	1	0	0	0	0	0	0	0	0	0	0	0	31	9	24	0	0	2	0	0	3	0	0	0	0	0
root|Viruses|Duplodnaviria|Heunggongvirae|Uroviricota|Caudoviricetes|Caudovirales|Herelleviridae|Bastillevirinae|unclassified Bastillevirinae	F2	2572874	Viruses	unclassified Bastillevirinae	4	3	4	2	6	2	6	4	3	2	1	2	2	7	0	1	2	7	3	0	1	2	0	1	0	1	0	2	0	1	0	7	6	5	1	0	4	0	0	1	1	0	1	0	1
root|Viruses|Duplodnaviria|Heunggongvirae|Uroviricota|Caudoviricetes|Caudovirales|Herelleviridae|Bastillevirinae|unclassified Bastillevirinae|Bacillus phage BSP38	S	2283013	Viruses	Bacillus phage BSP38	0	2	0	0	2	0	4	1	0	1	0	1	0	3	0	1	1	1	0	0	0	1	0	0	0	0	0	0	0	0	0	0	1	0	0	0	1	0	0	0	0	0	0	0	0
root|Viruses|Duplodnaviria|Heunggongvirae|Uroviricota|Caudoviricetes|Caudovirales|Herelleviridae|Bastillevirinae|unclassified Bastillevirinae|Bacillus phage Eldridge	S	1776293	Viruses	Bacillus phage Eldridge	2	0	2	1	1	1	1	0	1	1	1	1	1	1	0	0	1	2	1	0	0	0	0	1	0	0	0	1	0	0	0	0	0	0	1	0	0	0	0	0	1	0	0	0	1
root|Viruses|Duplodnaviria|Heunggongvirae|Uroviricota|Caudoviricetes|Caudovirales|Herelleviridae|Bastillevirinae|unclassified Bastillevirinae|Bacillus phage vB_BmeM-Goe8	S	2593638	Viruses	Bacillus phage vB_BmeM-Goe8	0	1	0	0	1	1	0	2	0	0	0	0	0	1	0	0	0	1	1	0	1	0	0	0	0	0	0	0	0	0	0	3	2	0	0	0	0	0	0	0	0	0	0	0	0
root|Viruses|Duplodnaviria|Heunggongvirae|Uroviricota|Caudoviricetes|Caudovirales|Herelleviridae|Bastillevirinae|unclassified Bastillevirinae|Bacillus virus vB_BsuM-Goe3	S	1926346	Viruses	Bacillus virus vB_BsuM-Goe3	2	0	2	1	2	0	1	1	2	0	0	0	1	2	0	0	0	3	1	0	0	1	0	0	0	1	0	1	0	1	0	4	3	5	0	0	3	0	0	1	0	0	1	0	0
root|Viruses|Duplodnaviria|Heunggongvirae|Uroviricota|Caudoviricetes|Caudovirales|Herelleviridae|Bastillevirinae|unclassified Bastillevirinae|Bacillus virus vB_BsuM-Goe3	S1	1933063	Viruses	Bacillus phage vB_BsuM-Goe3	2	0	2	1	2	0	1	1	2	0	0	0	1	2	0	0	0	3	1	0	0	1	0	0	0	1	0	1	0	1	0	4	3	5	0	0	3	0	0	1	0	0	1	0	0
root|Viruses|Duplodnaviria|Heunggongvirae|Uroviricota|Caudoviricetes|Caudovirales|Herelleviridae|Brochothrix virus A9	S	2560358	Viruses	Brochothrix virus A9	1	2	2	3	2	1	2	0	0	0	2	0	0	0	0	2	1	0	2	0	0	4	0	0	0	0	2	1	1	0	2	0	0	0	0	0	0	0	0	0	1	0	0	0	0
root|Viruses|Duplodnaviria|Heunggongvirae|Uroviricota|Caudoviricetes|Caudovirales|Herelleviridae|Brochothrix virus A9|Brochothrix phage A9	S1	857312	Viruses	Brochothrix phage A9	1	2	2	3	2	1	2	0	0	0	2	0	0	0	0	2	1	0	2	0	0	4	0	0	0	0	2	1	1	0	2	0	0	0	0	0	0	0	0	0	1	0	0	0	0
root|Viruses|Duplodnaviria|Heunggongvirae|Uroviricota|Caudoviricetes|Caudovirales|Herelleviridae|Brockvirinae	F1	2560071	Viruses	Brockvirinae	7	14	4	7	4	9	10	4	1	1	11	5	6	8	5	30	4	3	5	0	0	2	5	3	1	5	6	8	8	2	1	1	1	1	2	0	4	0	1	0	2	3	2	1	0
root|Viruses|Duplodnaviria|Heunggongvirae|Uroviricota|Caudoviricetes|Caudovirales|Herelleviridae|Brockvirinae|Kochikohdavirus	G	2560160	Viruses	Kochikohdavirus	2	8	0	2	1	1	0	0	0	0	1	1	1	6	4	30	3	2	2	0	0	0	4	1	0	1	4	2	1	0	1	0	0	1	2	0	1	0	1	0	1	2	1	0	0
root|Viruses|Duplodnaviria|Heunggongvirae|Uroviricota|Caudoviricetes|Caudovirales|Herelleviridae|Brockvirinae|Kochikohdavirus|Enterococcus virus ECP3	S	2560418	Viruses	Enterococcus virus ECP3	1	1	0	0	0	1	0	0	0	0	1	0	0	3	0	0	1	2	0	0	0	0	1	0	0	0	0	0	0	0	0	0	0	0	0	0	1	0	0	0	0	1	0	0	0
root|Viruses|Duplodnaviria|Heunggongvirae|Uroviricota|Caudoviricetes|Caudovirales|Herelleviridae|Brockvirinae|Kochikohdavirus|Enterococcus virus ECP3	S1	1498168	Viruses	Enterococcus phage ECP3	1	1	0	0	0	1	0	0	0	0	1	0	0	3	0	0	1	2	0	0	0	0	1	0	0	0	0	0	0	0	0	0	0	0	0	0	1	0	0	0	0	1	0	0	0
root|Viruses|Duplodnaviria|Heunggongvirae|Uroviricota|Caudoviricetes|Caudovirales|Herelleviridae|Brockvirinae|Kochikohdavirus|Enterococcus virus EF24C	S	2560419	Viruses	Enterococcus virus EF24C	1	3	0	1	0	0	0	0	0	0	0	1	0	0	2	0	1	0	0	0	0	0	0	0	0	0	0	0	0	0	0	0	0	0	0	0	0	0	0	0	0	0	0	0	0
root|Viruses|Duplodnaviria|Heunggongvirae|Uroviricota|Caudoviricetes|Caudovirales|Herelleviridae|Brockvirinae|Kochikohdavirus|Enterococcus virus EFLK1	S	2560423	Viruses	Enterococcus virus EFLK1	0	1	0	0	0	0	0	0	0	0	0	0	1	0	1	0	0	0	0	0	0	0	0	0	0	0	1	0	0	0	0	0	0	0	0	0	0	0	1	0	0	0	1	0	0
root|Viruses|Duplodnaviria|Heunggongvirae|Uroviricota|Caudoviricetes|Caudovirales|Herelleviridae|Brockvirinae|Kochikohdavirus|Enterococcus virus EFLK1	S1	1640885	Viruses	Enterococcus phage EFLK1	0	1	0	0	0	0	0	0	0	0	0	0	1	0	1	0	0	0	0	0	0	0	0	0	0	0	1	0	0	0	0	0	0	0	0	0	0	0	1	0	0	0	1	0	0
root|Viruses|Duplodnaviria|Heunggongvirae|Uroviricota|Caudoviricetes|Caudovirales|Herelleviridae|Brockvirinae|Schiekvirus	G	2732968	Viruses	Schiekvirus	5	6	4	5	3	8	10	4	1	1	9	3	5	2	1	0	1	1	3	0	0	2	0	0	1	4	2	5	6	2	0	1	1	0	0	0	3	0	0	0	1	1	1	0	0
root|Viruses|Duplodnaviria|Heunggongvirae|Uroviricota|Caudoviricetes|Caudovirales|Herelleviridae|Brockvirinae|Schiekvirus|Enterococcus virus EFDG1	S	2560422	Viruses	Enterococcus virus EFDG1	0	0	0	1	1	1	1	2	0	0	4	1	0	0	0	0	0	0	0	0	0	0	0	0	0	0	0	0	3	0	0	0	0	0	0	0	0	0	0	0	1	1	0	0	0
root|Viruses|Duplodnaviria|Heunggongvirae|Uroviricota|Caudoviricetes|Caudovirales|Herelleviridae|Brockvirinae|Schiekvirus|Enterococcus virus EFDG1	S1	1597976	Viruses	Enterococcus phage EFDG1	0	0	0	1	1	1	1	2	0	0	4	1	0	0	0	0	0	0	0	0	0	0	0	0	0	0	0	0	3	0	0	0	0	0	0	0	0	0	0	0	1	1	0	0	0
root|Viruses|Duplodnaviria|Heunggongvirae|Uroviricota|Caudoviricetes|Caudovirales|Herelleviridae|Brockvirinae|Schiekvirus|Enterococcus virus EFP01	S	2734044	Viruses	Enterococcus virus EFP01	3	4	1	4	0	1	4	1	1	0	2	1	2	0	1	0	0	0	2	0	0	1	0	0	0	2	2	2	2	0	0	0	0	0	0	0	2	0	0	0	0	0	0	0	0
root|Viruses|Duplodnaviria|Heunggongvirae|Uroviricota|Caudoviricetes|Caudovirales|Herelleviridae|Brockvirinae|Schiekvirus|Enterococcus virus EFP01	S1	1926594	Viruses	Enterococcus phage EFP01	3	4	1	4	0	1	4	1	1	0	2	1	2	0	1	0	0	0	2	0	0	1	0	0	0	2	2	2	2	0	0	0	0	0	0	0	2	0	0	0	0	0	0	0	0
root|Viruses|Duplodnaviria|Heunggongvirae|Uroviricota|Caudoviricetes|Caudovirales|Herelleviridae|Brockvirinae|Schiekvirus|Enterococcus virus EfV12	S	2734045	Viruses	Enterococcus virus EfV12	0	0	1	0	0	0	2	0	0	0	0	0	0	0	0	0	0	1	1	0	0	0	0	0	0	1	0	2	0	0	0	0	0	0	0	0	1	0	0	0	0	0	1	0	0
root|Viruses|Duplodnaviria|Heunggongvirae|Uroviricota|Caudoviricetes|Caudovirales|Herelleviridae|Brockvirinae|Schiekvirus|Enterococcus virus EfV12	S1	2315766	Viruses	Enterococcus phage EfV12-phi1	0	0	1	0	0	0	2	0	0	0	0	0	0	0	0	0	0	1	1	0	0	0	0	0	0	1	0	2	0	0	0	0	0	0	0	0	1	0	0	0	0	0	1	0	0
root|Viruses|Duplodnaviria|Heunggongvirae|Uroviricota|Caudoviricetes|Caudovirales|Herelleviridae|Jasinkavirinae	F1	2560073	Viruses	Jasinkavirinae	8	2	3	1	1	2	2	1	3	0	3	2	1	8	1	2	1	2	2	0	0	0	0	0	0	0	1	1	0	1	0	3	2	12	0	1	2	0	0	1	1	0	1	1	1
root|Viruses|Duplodnaviria|Heunggongvirae|Uroviricota|Caudoviricetes|Caudovirales|Herelleviridae|Jasinkavirinae|Pecentumvirus	G	1857844	Viruses	Pecentumvirus	8	2	3	1	1	2	2	1	3	0	3	2	1	8	1	2	1	2	2	0	0	0	0	0	0	0	1	1	0	1	0	3	2	12	0	1	2	0	0	1	1	0	1	1	1
root|Viruses|Duplodnaviria|Heunggongvirae|Uroviricota|Caudoviricetes|Caudovirales|Herelleviridae|Jasinkavirinae|Pecentumvirus|Listeria virus AG20	S	2560553	Viruses	Listeria virus AG20	0	1	0	0	0	1	0	0	0	0	1	0	0	2	0	0	0	0	0	0	0	0	0	0	0	0	0	0	0	0	0	0	0	0	0	0	0	0	0	0	0	0	0	0	0
root|Viruses|Duplodnaviria|Heunggongvirae|Uroviricota|Caudoviricetes|Caudovirales|Herelleviridae|Jasinkavirinae|Pecentumvirus|Listeria virus AG20	S1	1168744	Viruses	Listeria phage vB_LmoM_AG20	0	1	0	0	0	1	0	0	0	0	1	0	0	2	0	0	0	0	0	0	0	0	0	0	0	0	0	0	0	0	0	0	0	0	0	0	0	0	0	0	0	0	0	0	0
root|Viruses|Duplodnaviria|Heunggongvirae|Uroviricota|Caudoviricetes|Caudovirales|Herelleviridae|Jasinkavirinae|Pecentumvirus|Listeria virus LMSP25	S	2560554	Viruses	Listeria virus LMSP25	0	0	0	0	0	0	0	0	0	0	0	0	0	0	0	0	0	2	0	0	0	0	0	0	0	0	0	0	0	0	0	0	0	0	0	0	0	0	0	0	0	0	0	0	0
root|Viruses|Duplodnaviria|Heunggongvirae|Uroviricota|Caudoviricetes|Caudovirales|Herelleviridae|Jasinkavirinae|Pecentumvirus|Listeria virus LMSP25	S1	1486414	Viruses	Listeria phage LMTA-57	0	0	0	0	0	0	0	0	0	0	0	0	0	0	0	0	0	2	0	0	0	0	0	0	0	0	0	0	0	0	0	0	0	0	0	0	0	0	0	0	0	0	0	0	0
root|Viruses|Duplodnaviria|Heunggongvirae|Uroviricota|Caudoviricetes|Caudovirales|Herelleviridae|Jasinkavirinae|Pecentumvirus|Listeria virus LMTA148	S	2560555	Viruses	Listeria virus LMTA148	0	0	0	0	0	0	0	0	0	0	0	0	0	0	0	0	0	0	0	0	0	0	0	0	0	0	0	0	0	0	0	0	0	0	0	1	0	0	0	0	0	0	0	0	0
root|Viruses|Duplodnaviria|Heunggongvirae|Uroviricota|Caudoviricetes|Caudovirales|Herelleviridae|Jasinkavirinae|Pecentumvirus|Listeria virus LMTA148	S1	1486413	Viruses	Listeria phage LMTA-148	0	0	0	0	0	0	0	0	0	0	0	0	0	0	0	0	0	0	0	0	0	0	0	0	0	0	0	0	0	0	0	0	0	0	0	1	0	0	0	0	0	0	0	0	0
root|Viruses|Duplodnaviria|Heunggongvirae|Uroviricota|Caudoviricetes|Caudovirales|Herelleviridae|Jasinkavirinae|Pecentumvirus|Listeria virus List36	S	2560560	Viruses	Listeria virus List36	0	0	1	0	0	1	0	0	0	0	0	0	0	0	0	0	0	0	0	0	0	0	0	0	0	0	0	0	0	0	0	0	0	0	0	0	0	0	0	1	0	0	0	0	0
root|Viruses|Duplodnaviria|Heunggongvirae|Uroviricota|Caudoviricetes|Caudovirales|Herelleviridae|Jasinkavirinae|Pecentumvirus|Listeria virus List36	S1	1486422	Viruses	Listeria phage List-36	0	0	1	0	0	1	0	0	0	0	0	0	0	0	0	0	0	0	0	0	0	0	0	0	0	0	0	0	0	0	0	0	0	0	0	0	0	0	0	1	0	0	0	0	0
root|Viruses|Duplodnaviria|Heunggongvirae|Uroviricota|Caudoviricetes|Caudovirales|Herelleviridae|Lactobacillus virus LP65	S	298338	Viruses	Lactobacillus virus LP65	0	1	1	0	2	0	2	1	0	0	0	0	0	0	0	1	0	3	3	0	0	0	0	0	0	0	0	0	0	0	0	0	0	0	0	0	1	0	0	0	0	0	0	0	0
root|Viruses|Duplodnaviria|Heunggongvirae|Uroviricota|Caudoviricetes|Caudovirales|Herelleviridae|Lactobacillus virus Lb338-1	S	632112	Viruses	Lactobacillus virus Lb338-1	1	7	1	5	5	1	0	4	0	5	3	0	0	2	3	2	2	3	0	0	0	2	2	1	0	0	1	3	2	0	0	1	0	0	0	0	2	1	0	1	0	1	1	0	0
root|Viruses|Duplodnaviria|Heunggongvirae|Uroviricota|Caudoviricetes|Caudovirales|Herelleviridae|Spounavirinae	F1	857473	Viruses	Spounavirinae	8	8	7	5	8	6	9	2	6	15	1	3	6	15	0	2	5	5	19	4	0	0	1	0	3	4	8	2	1	2	0	0	0	0	2	39	4	0	0	4	0	2	3	0	2
root|Viruses|Duplodnaviria|Heunggongvirae|Uroviricota|Caudoviricetes|Caudovirales|Herelleviridae|Spounavirinae|Okubovirus	G	1857845	Viruses	Okubovirus	4	5	3	2	1	3	6	1	5	12	1	2	5	10	0	0	2	3	19	1	0	0	1	0	3	3	8	2	0	1	0	0	0	0	0	0	0	0	0	3	0	1	3	0	2
root|Viruses|Duplodnaviria|Heunggongvirae|Uroviricota|Caudoviricetes|Caudovirales|Herelleviridae|Spounavirinae|Okubovirus|Bacillus virus Camphawk	S	1986015	Viruses	Bacillus virus Camphawk	0	0	0	0	0	0	0	0	0	1	0	0	1	0	0	0	0	0	0	0	0	0	0	0	0	0	0	0	0	0	0	0	0	0	0	0	0	0	0	0	0	0	0	0	0
root|Viruses|Duplodnaviria|Heunggongvirae|Uroviricota|Caudoviricetes|Caudovirales|Herelleviridae|Spounavirinae|Okubovirus|Bacillus virus Camphawk	S1	1406783	Viruses	Bacillus phage CampHawk	0	0	0	0	0	0	0	0	0	1	0	0	1	0	0	0	0	0	0	0	0	0	0	0	0	0	0	0	0	0	0	0	0	0	0	0	0	0	0	0	0	0	0	0	0
root|Viruses|Duplodnaviria|Heunggongvirae|Uroviricota|Caudoviricetes|Caudovirales|Herelleviridae|Spounavirinae|Okubovirus|Bacillus virus SPO1	S	10685	Viruses	Bacillus virus SPO1	1	2	0	2	0	0	0	0	0	0	0	1	0	1	0	0	0	0	0	0	0	0	1	0	0	0	0	0	0	0	0	0	0	0	0	0	0	0	0	1	0	0	0	0	0
root|Viruses|Duplodnaviria|Heunggongvirae|Uroviricota|Caudoviricetes|Caudovirales|Herelleviridae|Spounavirinae|Siminovitchvirus	G	1918721	Viruses	Siminovitchvirus	3	2	3	2	5	3	3	1	1	1	0	1	1	4	0	2	2	2	0	3	0	0	0	0	0	1	0	0	1	1	0	0	0	0	1	0	0	0	0	1	0	1	0	0	0
root|Viruses|Duplodnaviria|Heunggongvirae|Uroviricota|Caudoviricetes|Caudovirales|Herelleviridae|Spounavirinae|Siminovitchvirus|Bacillus virus CP51	S	1918722	Viruses	Bacillus virus CP51	0	1	0	1	0	1	1	0	0	0	0	1	0	2	0	2	0	1	0	1	0	0	0	0	0	0	0	0	0	0	0	0	0	0	0	0	0	0	0	0	0	1	0	0	0
root|Viruses|Duplodnaviria|Heunggongvirae|Uroviricota|Caudoviricetes|Caudovirales|Herelleviridae|Spounavirinae|Siminovitchvirus|Bacillus virus CP51	S1	1391188	Viruses	Bacillus phage CP-51	0	1	0	1	0	1	1	0	0	0	0	1	0	2	0	2	0	1	0	1	0	0	0	0	0	0	0	0	0	0	0	0	0	0	0	0	0	0	0	0	0	1	0	0	0
root|Viruses|Duplodnaviria|Heunggongvirae|Uroviricota|Caudoviricetes|Caudovirales|Herelleviridae|Spounavirinae|Siminovitchvirus|Bacillus virus JL	S	1918723	Viruses	Bacillus virus JL	0	0	2	0	0	1	0	0	0	0	0	0	0	0	0	0	1	0	0	0	0	0	0	0	0	1	0	0	0	0	0	0	0	0	1	0	0	0	0	1	0	0	0	0	0
root|Viruses|Duplodnaviria|Heunggongvirae|Uroviricota|Caudoviricetes|Caudovirales|Herelleviridae|Spounavirinae|Siminovitchvirus|Bacillus virus JL	S1	1296655	Viruses	Bacillus phage JL	0	0	2	0	0	1	0	0	0	0	0	0	0	0	0	0	1	0	0	0	0	0	0	0	0	1	0	0	0	0	0	0	0	0	1	0	0	0	0	1	0	0	0	0	0
root|Viruses|Duplodnaviria|Heunggongvirae|Uroviricota|Caudoviricetes|Caudovirales|Herelleviridae|Spounavirinae|Siminovitchvirus|Bacillus virus Shanette	S	1918724	Viruses	Bacillus virus Shanette	3	0	1	0	4	0	2	1	0	0	0	0	1	2	0	0	0	0	0	2	0	0	0	0	0	0	0	0	0	1	0	0	0	0	0	0	0	0	0	0	0	0	0	0	0
root|Viruses|Duplodnaviria|Heunggongvirae|Uroviricota|Caudoviricetes|Caudovirales|Herelleviridae|Spounavirinae|Siminovitchvirus|Bacillus virus Shanette	S1	1296656	Viruses	Bacillus phage Shanette	3	0	1	0	4	0	2	1	0	0	0	0	1	2	0	0	0	0	0	2	0	0	0	0	0	0	0	0	0	1	0	0	0	0	0	0	0	0	0	0	0	0	0	0	0
root|Viruses|Duplodnaviria|Heunggongvirae|Uroviricota|Caudoviricetes|Caudovirales|Herelleviridae|Spounavirinae|unclassified Spounavirinae	F2	857474	Viruses	unclassified Spounavirinae	1	1	1	1	2	0	0	0	0	2	0	0	0	1	0	0	1	0	0	0	0	0	0	0	0	0	0	0	0	0	0	0	0	0	1	39	4	0	0	0	0	0	0	0	0
root|Viruses|Duplodnaviria|Heunggongvirae|Uroviricota|Caudoviricetes|Caudovirales|Herelleviridae|Spounavirinae|unclassified Spounavirinae|Bacillus phage SP-10	S	941058	Viruses	Bacillus phage SP-10	1	1	1	1	2	0	0	0	0	2	0	0	0	1	0	0	1	0	0	0	0	0	0	0	0	0	0	0	0	0	0	0	0	0	1	39	4	0	0	0	0	0	0	0	0
root|Viruses|Duplodnaviria|Heunggongvirae|Uroviricota|Caudoviricetes|Caudovirales|Herelleviridae|Twortvirinae	F1	2560081	Viruses	Twortvirinae	62	84	75	40	60	46	40	57	29	22	64	1594	23	79	210	31959	41	54	28	14	6	252	24	45	45	28	1154	53	39	31	472	91	98	78	246	39	56	10	348	10	92	103	9	10	17
root|Viruses|Duplodnaviria|Heunggongvirae|Uroviricota|Caudoviricetes|Caudovirales|Herelleviridae|Twortvirinae|Baoshanvirus	G	2732969	Viruses	Baoshanvirus	5	6	5	2	2	10	2	13	5	3	29	220	4	4	10	576	7	11	3	7	0	43	4	1	5	3	746	17	0	9	64	1	1	1	16	2	4	1	216	1	60	0	1	0	1
root|Viruses|Duplodnaviria|Heunggongvirae|Uroviricota|Caudoviricetes|Caudovirales|Herelleviridae|Twortvirinae|Baoshanvirus|Staphylococcus virus BS1	S	2734046	Viruses	Staphylococcus virus BS1	0	0	0	0	2	2	0	0	0	0	3	34	0	0	0	63	1	1	0	1	0	10	0	0	0	0	47	0	0	0	2	0	0	0	2	0	1	0	15	0	7	0	0	0	0
root|Viruses|Duplodnaviria|Heunggongvirae|Uroviricota|Caudoviricetes|Caudovirales|Herelleviridae|Twortvirinae|Baoshanvirus|Staphylococcus virus BS1	S1	2126734	Viruses	Staphylococcus phage phiSA_BS1	0	0	0	0	2	2	0	0	0	0	3	34	0	0	0	63	1	1	0	1	0	10	0	0	0	0	47	0	0	0	2	0	0	0	2	0	1	0	15	0	7	0	0	0	0
root|Viruses|Duplodnaviria|Heunggongvirae|Uroviricota|Caudoviricetes|Caudovirales|Herelleviridae|Twortvirinae|Baoshanvirus|Staphylococcus virus BS2	S	2734047	Viruses	Staphylococcus virus BS2	1	0	1	1	0	1	0	1	1	0	2	164	0	0	1	158	0	2	0	2	0	28	1	0	1	2	71	3	0	0	12	1	0	0	0	1	0	0	24	0	4	0	1	0	0
root|Viruses|Duplodnaviria|Heunggongvirae|Uroviricota|Caudoviricetes|Caudovirales|Herelleviridae|Twortvirinae|Baoshanvirus|Staphylococcus virus BS2	S1	2126724	Viruses	Staphylococcus phage phiSA_BS2	1	0	1	1	0	1	0	1	1	0	2	164	0	0	1	158	0	2	0	2	0	28	1	0	1	2	71	3	0	0	12	1	0	0	0	1	0	0	24	0	4	0	1	0	0
root|Viruses|Duplodnaviria|Heunggongvirae|Uroviricota|Caudoviricetes|Caudovirales|Herelleviridae|Twortvirinae|Harbinvirus	G	2732970	Viruses	Harbinvirus	16	14	5	17	28	9	9	12	4	2	2	8	5	9	1	3	8	28	10	0	1	3	0	2	0	3	5	11	4	7	0	9	11	0	1	0	15	3	1	0	1	2	0	0	0
root|Viruses|Duplodnaviria|Heunggongvirae|Uroviricota|Caudoviricetes|Caudovirales|Herelleviridae|Twortvirinae|Harbinvirus|Lactobacillus virus Bacchae	S	2734048	Viruses	Lactobacillus virus Bacchae	0	0	0	3	5	0	2	2	0	0	0	0	1	0	0	0	0	2	0	0	0	0	0	0	0	0	0	0	0	0	0	0	0	0	0	0	0	0	0	0	0	0	0	0	0
root|Viruses|Duplodnaviria|Heunggongvirae|Uroviricota|Caudoviricetes|Caudovirales|Herelleviridae|Twortvirinae|Harbinvirus|Lactobacillus virus Bacchae	S1	2079429	Viruses	Lactobacillus phage Bacchae	0	0	0	3	5	0	2	2	0	0	0	0	1	0	0	0	0	2	0	0	0	0	0	0	0	0	0	0	0	0	0	0	0	0	0	0	0	0	0	0	0	0	0	0	0
root|Viruses|Duplodnaviria|Heunggongvirae|Uroviricota|Caudoviricetes|Caudovirales|Herelleviridae|Twortvirinae|Harbinvirus|Lactobacillus virus Iacchus	S	2734050	Viruses	Lactobacillus virus Iacchus	0	3	0	0	1	1	0	1	0	0	0	0	0	2	0	0	0	1	0	0	0	1	0	1	0	0	1	3	0	0	0	0	0	0	0	0	5	0	0	0	0	0	0	0	0
root|Viruses|Duplodnaviria|Heunggongvirae|Uroviricota|Caudoviricetes|Caudovirales|Herelleviridae|Twortvirinae|Harbinvirus|Lactobacillus virus Iacchus	S1	2315483	Viruses	Lactobacillus phage Iacchus	0	3	0	0	1	1	0	1	0	0	0	0	0	2	0	0	0	1	0	0	0	1	0	1	0	0	1	3	0	0	0	0	0	0	0	0	5	0	0	0	0	0	0	0	0
root|Viruses|Duplodnaviria|Heunggongvirae|Uroviricota|Caudoviricetes|Caudovirales|Herelleviridae|Twortvirinae|Harbinvirus|Lactobacillus virus Lpa804	S	2734051	Viruses	Lactobacillus virus Lpa804	12	10	3	6	10	7	5	5	4	1	2	7	4	6	1	1	5	7	5	0	0	1	0	1	0	2	2	6	3	5	0	0	0	0	1	0	7	0	1	0	0	2	0	0	0
root|Viruses|Duplodnaviria|Heunggongvirae|Uroviricota|Caudoviricetes|Caudovirales|Herelleviridae|Twortvirinae|Harbinvirus|Lactobacillus virus Lpa804	S1	2059850	Viruses	Lactobacillus phage Lpa804	12	10	3	6	10	7	5	5	4	1	2	7	4	6	1	1	5	7	5	0	0	1	0	1	0	2	2	6	3	5	0	0	0	0	1	0	7	0	1	0	0	2	0	0	0
root|Viruses|Duplodnaviria|Heunggongvirae|Uroviricota|Caudoviricetes|Caudovirales|Herelleviridae|Twortvirinae|Harbinvirus|Lactobacillus virus Semele	S	2734052	Viruses	Lactobacillus virus Semele	1	0	0	1	1	0	0	0	0	0	0	0	0	0	0	0	0	2	0	0	0	0	0	0	0	0	1	2	0	1	0	0	0	0	0	0	1	2	0	0	1	0	0	0	0
root|Viruses|Duplodnaviria|Heunggongvirae|Uroviricota|Caudoviricetes|Caudovirales|Herelleviridae|Twortvirinae|Harbinvirus|Lactobacillus virus Semele	S1	2079433	Viruses	Lactobacillus phage Semele	1	0	0	1	1	0	0	0	0	0	0	0	0	0	0	0	0	2	0	0	0	0	0	0	0	0	1	2	0	1	0	0	0	0	0	0	1	2	0	0	1	0	0	0	0
root|Viruses|Duplodnaviria|Heunggongvirae|Uroviricota|Caudoviricetes|Caudovirales|Herelleviridae|Twortvirinae|Kayvirus	G	1857843	Viruses	Kayvirus	12	47	43	10	16	12	17	19	19	6	16	767	5	27	29	30070	15	7	7	6	3	122	1	29	39	18	342	8	21	6	377	60	46	43	47	26	20	6	44	4	16	15	3	8	8
root|Viruses|Duplodnaviria|Heunggongvirae|Uroviricota|Caudoviricetes|Caudovirales|Herelleviridae|Twortvirinae|Kayvirus|Staphylococcus virus G1	S	292029	Viruses	Staphylococcus virus G1	0	0	0	0	0	0	0	0	0	0	0	80	0	0	0	552	0	0	0	0	0	0	0	1	2	0	4	0	0	0	5	0	0	0	0	0	0	0	2	0	0	0	0	0	0
root|Viruses|Duplodnaviria|Heunggongvirae|Uroviricota|Caudoviricetes|Caudovirales|Herelleviridae|Twortvirinae|Kayvirus|Staphylococcus virus G1	S1	1195080	Viruses	Staphylococcus phage P4W	0	0	0	0	0	0	0	0	0	0	0	0	0	0	0	58	0	0	0	0	0	0	0	0	0	0	0	0	0	0	0	0	0	0	0	0	0	0	0	0	0	0	0	0	0
root|Viruses|Duplodnaviria|Heunggongvirae|Uroviricota|Caudoviricetes|Caudovirales|Herelleviridae|Twortvirinae|Kayvirus|Staphylococcus virus G1	S1	1239385	Viruses	Staphylococcus phage SA5	0	0	0	0	0	0	0	0	0	0	0	0	0	0	0	179	0	0	0	0	0	0	0	1	2	0	2	0	0	0	1	0	0	0	0	0	0	0	0	0	0	0	0	0	0
root|Viruses|Duplodnaviria|Heunggongvirae|Uroviricota|Caudoviricetes|Caudovirales|Herelleviridae|Twortvirinae|Kayvirus|Staphylococcus virus G1	S1	1610830	Viruses	Staphylococcus phage IME-SA1	0	0	0	0	0	0	0	0	0	0	0	0	0	0	0	12	0	0	0	0	0	0	0	0	0	0	0	0	0	0	0	0	0	0	0	0	0	0	0	0	0	0	0	0	0
root|Viruses|Duplodnaviria|Heunggongvirae|Uroviricota|Caudoviricetes|Caudovirales|Herelleviridae|Twortvirinae|Kayvirus|Staphylococcus virus G1	S1	1610831	Viruses	Staphylococcus phage IME-SA2	0	0	0	0	0	0	0	0	0	0	0	0	0	0	0	182	0	0	0	0	0	0	0	0	0	0	1	0	0	0	2	0	0	0	0	0	0	0	0	0	0	0	0	0	0
root|Viruses|Duplodnaviria|Heunggongvirae|Uroviricota|Caudoviricetes|Caudovirales|Herelleviridae|Twortvirinae|Kayvirus|Staphylococcus virus G15	S	1924732	Viruses	Staphylococcus virus G15	0	1	1	0	0	0	0	0	0	0	0	0	0	0	0	1565	0	0	0	0	0	0	0	0	1	1	18	0	1	0	21	0	3	0	0	0	0	0	1	0	0	0	0	0	0
root|Viruses|Duplodnaviria|Heunggongvirae|Uroviricota|Caudoviricetes|Caudovirales|Herelleviridae|Twortvirinae|Kayvirus|Staphylococcus virus G15	S1	760530	Viruses	Staphylococcus phage G15	0	1	1	0	0	0	0	0	0	0	0	0	0	0	0	1565	0	0	0	0	0	0	0	0	1	1	18	0	1	0	21	0	3	0	0	0	0	0	1	0	0	0	0	0	0
root|Viruses|Duplodnaviria|Heunggongvirae|Uroviricota|Caudoviricetes|Caudovirales|Herelleviridae|Twortvirinae|Kayvirus|Staphylococcus virus JD7	S	1924729	Viruses	Staphylococcus virus JD7	1	3	0	0	1	0	0	1	1	0	0	0	0	3	1	660	1	0	0	0	1	0	0	1	1	1	6	1	0	0	10	2	0	0	0	2	0	0	4	0	0	0	1	0	0
root|Viruses|Duplodnaviria|Heunggongvirae|Uroviricota|Caudoviricetes|Caudovirales|Herelleviridae|Twortvirinae|Kayvirus|Staphylococcus virus JD7	S1	1239383	Viruses	Staphylococcus phage JD007	1	3	0	0	1	0	0	1	1	0	0	0	0	3	1	660	1	0	0	0	1	0	0	1	1	1	6	1	0	0	10	2	0	0	0	2	0	0	4	0	0	0	1	0	0
root|Viruses|Duplodnaviria|Heunggongvirae|Uroviricota|Caudoviricetes|Caudovirales|Herelleviridae|Twortvirinae|Kayvirus|Staphylococcus virus MCE2014	S	1924733	Viruses	Staphylococcus virus MCE2014	0	3	5	1	3	0	1	0	2	2	0	0	0	2	2	2770	1	0	0	0	1	0	0	3	1	1	23	0	4	1	35	1	1	1	2	1	0	0	5	0	0	1	0	0	1
root|Viruses|Duplodnaviria|Heunggongvirae|Uroviricota|Caudoviricetes|Caudovirales|Herelleviridae|Twortvirinae|Kayvirus|Staphylococcus virus MCE2014	S1	1524910	Viruses	Staphylococcus phage MCE-2014	0	3	5	1	3	0	1	0	2	2	0	0	0	2	2	2770	1	0	0	0	1	0	0	3	1	1	23	0	4	1	35	1	1	1	2	1	0	0	5	0	0	1	0	0	1
root|Viruses|Duplodnaviria|Heunggongvirae|Uroviricota|Caudoviricetes|Caudovirales|Herelleviridae|Twortvirinae|Kayvirus|Staphylococcus virus P108	S	1924731	Viruses	Staphylococcus virus P108	0	3	2	0	0	0	0	1	0	1	0	0	0	0	2	2702	0	0	0	0	0	0	0	2	1	0	21	0	3	0	32	1	1	0	0	0	0	0	3	0	1	0	0	0	0
root|Viruses|Duplodnaviria|Heunggongvirae|Uroviricota|Caudoviricetes|Caudovirales|Herelleviridae|Twortvirinae|Kayvirus|Staphylococcus virus P108	S1	1526408	Viruses	Staphylococcus phage P108	0	3	2	0	0	0	0	1	0	1	0	0	0	0	2	2702	0	0	0	0	0	0	0	2	1	0	21	0	3	0	32	1	1	0	0	0	0	0	3	0	1	0	0	0	0
root|Viruses|Duplodnaviria|Heunggongvirae|Uroviricota|Caudoviricetes|Caudovirales|Herelleviridae|Twortvirinae|Kayvirus|Staphylococcus virus Rodi	S	1980962	Viruses	Staphylococcus virus Rodi	0	3	2	1	2	0	0	1	3	0	3	118	2	4	1	2561	5	1	2	0	1	13	0	3	5	4	23	1	1	0	32	2	6	0	4	2	0	0	1	0	0	2	0	0	0
root|Viruses|Duplodnaviria|Heunggongvirae|Uroviricota|Caudoviricetes|Caudovirales|Herelleviridae|Twortvirinae|Kayvirus|Staphylococcus virus Rodi	S1	1572703	Viruses	Staphylococcus phage phiIPLA-RODI	0	3	2	1	2	0	0	1	3	0	3	118	2	4	1	2561	5	1	2	0	1	13	0	3	5	4	23	1	1	0	32	2	6	0	4	2	0	0	1	0	0	2	0	0	0
root|Viruses|Duplodnaviria|Heunggongvirae|Uroviricota|Caudoviricetes|Caudovirales|Herelleviridae|Twortvirinae|Kayvirus|Staphylococcus virus S25-4	S	1980964	Viruses	Staphylococcus virus S25-4	0	1	1	0	1	0	0	0	0	1	0	0	0	0	0	399	1	0	0	0	0	0	0	2	0	0	5	0	0	0	11	1	0	0	0	3	0	0	0	0	0	1	0	0	0
root|Viruses|Duplodnaviria|Heunggongvirae|Uroviricota|Caudoviricetes|Caudovirales|Herelleviridae|Twortvirinae|Kayvirus|Staphylococcus virus S25-4	S1	1041527	Viruses	Staphylococcus phage S25-4	0	1	1	0	1	0	0	0	0	1	0	0	0	0	0	399	1	0	0	0	0	0	0	2	0	0	5	0	0	0	11	1	0	0	0	3	0	0	0	0	0	1	0	0	0
root|Viruses|Duplodnaviria|Heunggongvirae|Uroviricota|Caudoviricetes|Caudovirales|Herelleviridae|Twortvirinae|Kayvirus|Staphylococcus virus S253	S	1924734	Viruses	Staphylococcus virus S253	0	0	0	0	0	0	0	1	0	0	0	0	0	0	0	118	0	0	0	0	0	0	0	0	2	0	5	0	0	0	2	0	0	0	0	0	0	0	0	0	0	0	0	0	0
root|Viruses|Duplodnaviria|Heunggongvirae|Uroviricota|Caudoviricetes|Caudovirales|Herelleviridae|Twortvirinae|Kayvirus|Staphylococcus virus S253	S1	1041526	Viruses	Staphylococcus phage S25-3	0	0	0	0	0	0	0	1	0	0	0	0	0	0	0	118	0	0	0	0	0	0	0	0	2	0	5	0	0	0	2	0	0	0	0	0	0	0	0	0	0	0	0	0	0
root|Viruses|Duplodnaviria|Heunggongvirae|Uroviricota|Caudoviricetes|Caudovirales|Herelleviridae|Twortvirinae|Kayvirus|Staphylococcus virus SA12	S	1924730	Viruses	Staphylococcus virus SA12	0	4	2	2	0	0	2	0	0	0	1	2	0	1	1	1700	0	0	0	0	0	0	0	0	1	2	18	0	1	0	22	2	1	1	1	2	0	0	1	0	0	0	0	0	1
root|Viruses|Duplodnaviria|Heunggongvirae|Uroviricota|Caudoviricetes|Caudovirales|Herelleviridae|Twortvirinae|Kayvirus|Staphylococcus virus SA12	S1	1450142	Viruses	Staphylococcus phage phiSA12	0	4	2	2	0	0	2	0	0	0	1	2	0	1	1	1700	0	0	0	0	0	0	0	0	1	2	18	0	1	0	22	2	1	1	1	2	0	0	1	0	0	0	0	0	1
root|Viruses|Duplodnaviria|Heunggongvirae|Uroviricota|Caudoviricetes|Caudovirales|Herelleviridae|Twortvirinae|Kayvirus|Staphylococcus virus Sb1	S	2560781	Viruses	Staphylococcus virus Sb1	0	0	0	0	0	0	0	0	0	0	0	0	0	0	0	61	0	0	0	0	0	0	0	0	0	0	0	0	0	0	0	0	0	0	0	0	0	0	0	0	0	0	0	0	0
root|Viruses|Duplodnaviria|Heunggongvirae|Uroviricota|Caudoviricetes|Caudovirales|Herelleviridae|Twortvirinae|Kayvirus|Staphylococcus virus Sb1	S1	1007127	Viruses	Staphylococcus phage Sb1	0	0	0	0	0	0	0	0	0	0	0	0	0	0	0	61	0	0	0	0	0	0	0	0	0	0	0	0	0	0	0	0	0	0	0	0	0	0	0	0	0	0	0	0	0
root|Viruses|Duplodnaviria|Heunggongvirae|Uroviricota|Caudoviricetes|Caudovirales|Herelleviridae|Twortvirinae|Sciuriunavirus	G	2732971	Viruses	Sciuriunavirus	8	6	12	3	4	7	4	3	0	3	6	3	3	8	8	235	3	4	4	0	1	3	5	4	0	0	5	1	8	2	3	2	0	1	11	6	6	0	0	2	4	39	4	0	3
root|Viruses|Duplodnaviria|Heunggongvirae|Uroviricota|Caudoviricetes|Caudovirales|Herelleviridae|Twortvirinae|Sciuriunavirus|Staphylococcus virus SscM1	S	2734053	Viruses	Staphylococcus virus SscM1	8	6	12	3	4	7	4	3	0	3	6	3	3	8	8	235	3	4	4	0	1	3	5	4	0	0	5	1	8	2	3	2	0	1	11	6	6	0	0	2	4	39	4	0	3
root|Viruses|Duplodnaviria|Heunggongvirae|Uroviricota|Caudoviricetes|Caudovirales|Herelleviridae|Twortvirinae|Sciuriunavirus|Staphylococcus virus SscM1	S1	1868844	Viruses	Staphylococcus phage vB_SscM-1	8	6	12	3	4	7	4	3	0	3	6	3	3	8	8	235	3	4	4	0	1	3	5	4	0	0	5	1	8	2	3	2	0	1	11	6	6	0	0	2	4	39	4	0	3
root|Viruses|Duplodnaviria|Heunggongvirae|Uroviricota|Caudoviricetes|Caudovirales|Herelleviridae|Twortvirinae|Sepunavirus	G	1980928	Viruses	Sepunavirus	5	4	5	3	2	4	4	2	1	1	5	5	3	11	10	177	2	1	1	0	0	0	0	2	1	2	12	7	1	1	4	18	38	30	9	3	9	0	9	2	6	5	1	1	1
root|Viruses|Duplodnaviria|Heunggongvirae|Uroviricota|Caudoviricetes|Caudovirales|Herelleviridae|Twortvirinae|Sepunavirus|Staphylococcus virus IPLAC1C	S	1980931	Viruses	Staphylococcus virus IPLAC1C	2	2	3	0	0	2	2	1	1	1	0	1	1	7	2	61	1	0	0	0	0	0	0	0	1	0	5	2	0	0	1	3	0	0	3	1	0	0	4	1	6	4	0	0	0
root|Viruses|Duplodnaviria|Heunggongvirae|Uroviricota|Caudoviricetes|Caudovirales|Herelleviridae|Twortvirinae|Sepunavirus|Staphylococcus virus IPLAC1C	S1	1572704	Viruses	Staphylococcus phage phiIPLA-C1C	2	2	3	0	0	2	2	1	1	1	0	1	1	7	2	61	1	0	0	0	0	0	0	0	1	0	5	2	0	0	1	3	0	0	3	1	0	0	4	1	6	4	0	0	0
root|Viruses|Duplodnaviria|Heunggongvirae|Uroviricota|Caudoviricetes|Caudovirales|Herelleviridae|Twortvirinae|Sepunavirus|Staphylococcus virus SEP1	S	1980930	Viruses	Staphylococcus virus SEP1	1	0	0	1	1	2	0	1	0	0	1	1	1	1	1	59	0	0	0	0	0	0	0	1	0	0	2	0	0	0	1	0	0	0	0	0	0	0	2	0	0	0	1	0	0
root|Viruses|Duplodnaviria|Heunggongvirae|Uroviricota|Caudoviricetes|Caudovirales|Herelleviridae|Twortvirinae|Sepunavirus|Staphylococcus virus SEP1	S1	1340769	Viruses	Staphylococcus phage phiIBB-SEP1	1	0	0	1	1	2	0	1	0	0	1	1	1	1	1	59	0	0	0	0	0	0	0	1	0	0	2	0	0	0	1	0	0	0	0	0	0	0	2	0	0	0	1	0	0
root|Viruses|Duplodnaviria|Heunggongvirae|Uroviricota|Caudoviricetes|Caudovirales|Herelleviridae|Twortvirinae|Silviavirus	G	1857889	Viruses	Silviavirus	8	5	5	3	4	4	3	1	0	4	5	583	1	9	11	502	3	2	0	1	1	76	7	5	0	1	31	5	4	3	14	1	2	0	31	2	1	0	18	0	4	39	0	1	2
root|Viruses|Duplodnaviria|Heunggongvirae|Uroviricota|Caudoviricetes|Caudovirales|Herelleviridae|Twortvirinae|Silviavirus|Staphylococcus virus Remus	S	1857890	Viruses	Staphylococcus virus Remus	0	1	1	0	2	1	0	0	0	2	0	289	0	7	0	274	1	0	0	1	0	20	0	1	0	0	10	1	1	0	7	0	0	0	10	1	0	0	2	0	0	0	0	0	0
root|Viruses|Duplodnaviria|Heunggongvirae|Uroviricota|Caudoviricetes|Caudovirales|Herelleviridae|Twortvirinae|Silviavirus|Staphylococcus virus Remus	S1	1235660	Viruses	Staphylococcus phage vB_SauM_Romulus	0	0	0	0	0	0	0	0	0	0	0	0	0	0	0	0	0	0	0	0	0	0	0	0	0	0	1	0	0	0	0	0	0	0	0	0	0	0	0	0	0	0	0	0	0
root|Viruses|Duplodnaviria|Heunggongvirae|Uroviricota|Caudoviricetes|Caudovirales|Herelleviridae|Twortvirinae|Silviavirus|Staphylococcus virus SA11	S	1204543	Viruses	Staphylococcus virus SA11	0	0	0	1	0	1	0	0	0	0	0	135	0	0	2	1	0	1	0	0	0	28	0	0	0	0	3	0	2	1	3	0	1	0	8	1	0	0	1	0	0	1	0	0	0
root|Viruses|Duplodnaviria|Heunggongvirae|Uroviricota|Caudoviricetes|Caudovirales|Herelleviridae|Twortvirinae|Silviavirus|Staphylococcus virus Stau2	S	2042206	Viruses	Staphylococcus virus Stau2	1	0	1	0	1	0	2	0	0	1	0	0	0	1	2	33	0	0	0	0	0	0	2	0	0	0	2	2	0	0	1	0	0	0	0	0	0	0	3	0	2	0	0	0	0
root|Viruses|Duplodnaviria|Heunggongvirae|Uroviricota|Caudoviricetes|Caudovirales|Herelleviridae|Twortvirinae|Silviavirus|Staphylococcus virus Stau2	S1	1200862	Viruses	Staphylococcus phage Stau2	1	0	1	0	1	0	2	0	0	1	0	0	0	1	2	33	0	0	0	0	0	0	2	0	0	0	2	2	0	0	1	0	0	0	0	0	0	0	3	0	2	0	0	0	0
root|Viruses|Duplodnaviria|Heunggongvirae|Uroviricota|Caudoviricetes|Caudovirales|Herelleviridae|Twortvirinae|Twortvirus	G	1857846	Viruses	Twortvirus	7	1	0	2	2	0	1	4	0	2	1	3	0	10	140	179	2	1	3	0	0	3	6	2	0	1	5	2	1	3	6	0	0	3	129	0	1	0	59	1	0	2	0	0	2
root|Viruses|Duplodnaviria|Heunggongvirae|Uroviricota|Caudoviricetes|Caudovirales|Herelleviridae|Twortvirinae|Twortvirus|Staphylococcus virus Twort	S	55510	Viruses	Staphylococcus virus Twort	7	1	0	2	2	0	1	4	0	2	1	3	0	10	140	179	2	1	3	0	0	3	6	2	0	1	5	2	1	3	6	0	0	3	129	0	1	0	59	1	0	2	0	0	2
root|Viruses|Duplodnaviria|Heunggongvirae|Uroviricota|Caudoviricetes|Caudovirales|Herelleviridae|unclassified Herelleviridae	F1	2572872	Viruses	unclassified Herelleviridae	7	9	6	6	3	5	5	4	5	5	10	2	2	10	3	3	4	11	2	1	0	2	0	2	0	4	2	7	5	2	0	37	31	47	1	1	8	0	1	3	4	9	21	0	2
root|Viruses|Duplodnaviria|Heunggongvirae|Uroviricota|Caudoviricetes|Caudovirales|Herelleviridae|unclassified Herelleviridae|Lactobacillus phage 3-521	S	2510943	Viruses	Lactobacillus phage 3-521	2	4	1	2	0	2	2	1	1	0	0	0	1	5	0	1	1	3	0	0	0	0	0	0	0	1	0	3	0	1	0	31	30	36	0	0	4	0	1	3	1	0	0	0	0
root|Viruses|Duplodnaviria|Heunggongvirae|Uroviricota|Caudoviricetes|Caudovirales|Herelleviridae|unclassified Herelleviridae|Lactobacillus phage 521B	S	2510942	Viruses	Lactobacillus phage 521B	3	2	0	0	0	0	0	0	1	1	4	1	1	0	0	0	1	0	1	0	0	1	0	0	0	1	0	4	1	0	0	0	0	0	0	0	0	0	0	0	0	1	0	0	0
root|Viruses|Duplodnaviria|Heunggongvirae|Uroviricota|Caudoviricetes|Caudovirales|Herelleviridae|unclassified Herelleviridae|Lactobacillus phage LfeInf	S	1567484	Viruses	Lactobacillus phage LfeInf	0	0	0	0	0	1	0	0	0	0	2	0	0	0	0	2	0	1	0	0	0	1	0	2	0	0	0	0	0	0	0	5	1	11	0	0	1	0	0	0	0	1	1	0	0
root|Viruses|Duplodnaviria|Heunggongvirae|Uroviricota|Caudoviricetes|Caudovirales|Herelleviridae|unclassified Herelleviridae|Lactobacillus phage LpeD	S	2041210	Viruses	Lactobacillus phage LpeD	2	1	2	2	2	2	0	3	1	2	1	1	0	1	3	0	0	6	0	0	0	0	0	0	0	2	2	0	1	1	0	0	0	0	0	1	3	0	0	0	0	6	0	0	1
root|Viruses|Duplodnaviria|Heunggongvirae|Uroviricota|Caudoviricetes|Caudovirales|Herelleviridae|unclassified Herelleviridae|Lactobacillus phage SAC12B	S	2510941	Viruses	Lactobacillus phage SAC12B	0	2	1	1	1	0	3	0	2	0	2	0	0	3	0	0	1	1	0	0	0	0	0	0	0	0	0	0	3	0	0	0	0	0	0	0	0	0	0	0	2	1	20	0	0
root|Viruses|Duplodnaviria|Heunggongvirae|Uroviricota|Caudoviricetes|Caudovirales|Lilyvirus	G	2560167	Viruses	Lilyvirus	0	0	0	0	1	0	0	0	0	0	0	0	0	1	0	0	1	1	0	0	0	1	0	0	0	0	0	0	0	0	0	0	0	0	0	0	0	0	0	0	0	0	0	0	0
root|Viruses|Duplodnaviria|Heunggongvirae|Uroviricota|Caudoviricetes|Caudovirales|Lilyvirus|Paenibacillus virus Lily	S	2560618	Viruses	Paenibacillus virus Lily	0	0	0	0	1	0	0	0	0	0	0	0	0	1	0	0	1	1	0	0	0	1	0	0	0	0	0	0	0	0	0	0	0	0	0	0	0	0	0	0	0	0	0	0	0
root|Viruses|Duplodnaviria|Heunggongvirae|Uroviricota|Caudoviricetes|Caudovirales|Lilyvirus|Paenibacillus virus Lily|Bacteriophage Lily	S1	1589751	Viruses	Bacteriophage Lily	0	0	0	0	1	0	0	0	0	0	0	0	0	1	0	0	1	1	0	0	0	1	0	0	0	0	0	0	0	0	0	0	0	0	0	0	0	0	0	0	0	0	0	0	0
root|Viruses|Duplodnaviria|Heunggongvirae|Uroviricota|Caudoviricetes|Caudovirales|Myoviridae	F	10662	Viruses	Myoviridae	905	942	846	598	680	842	829	573	463	446	717	1493	594	766	192	872	542	1528	656	739	138	595	287	326	248	405	591	575	601	823	391	717	441	777	200	460	873	84	460	470	310	601	380	69	287
root|Viruses|Duplodnaviria|Heunggongvirae|Uroviricota|Caudoviricetes|Caudovirales|Myoviridae|Abouovirus	G	1984773	Viruses	Abouovirus	0	1	1	0	3	1	3	1	1	1	3	1	1	1	0	0	1	3	2	1	0	0	0	0	0	0	1	1	2	1	0	0	1	0	0	0	0	0	0	0	0	0	0	1	0
root|Viruses|Duplodnaviria|Heunggongvirae|Uroviricota|Caudoviricetes|Caudovirales|Myoviridae|Abouovirus|Brevibacillus virus Abouo	S	1984774	Viruses	Brevibacillus virus Abouo	0	1	1	0	2	1	3	1	0	1	1	1	1	0	0	0	1	3	2	1	0	0	0	0	0	0	1	1	0	1	0	0	0	0	0	0	0	0	0	0	0	0	0	0	0
root|Viruses|Duplodnaviria|Heunggongvirae|Uroviricota|Caudoviricetes|Caudovirales|Myoviridae|Abouovirus|Brevibacillus virus Abouo|Brevibacillus phage Abouo	S1	1296661	Viruses	Brevibacillus phage Abouo	0	1	1	0	2	1	3	1	0	1	1	1	1	0	0	0	1	3	2	1	0	0	0	0	0	0	1	1	0	1	0	0	0	0	0	0	0	0	0	0	0	0	0	0	0
root|Viruses|Duplodnaviria|Heunggongvirae|Uroviricota|Caudoviricetes|Caudovirales|Myoviridae|Abouovirus|Brevibacillus virus Davies	S	1984775	Viruses	Brevibacillus virus Davies	0	0	0	0	1	0	0	0	1	0	0	0	0	1	0	0	0	0	0	0	0	0	0	0	0	0	0	0	2	0	0	0	0	0	0	0	0	0	0	0	0	0	0	0	0
root|Viruses|Duplodnaviria|Heunggongvirae|Uroviricota|Caudoviricetes|Caudovirales|Myoviridae|Abouovirus|Brevibacillus virus Davies|Brevibacillus phage Davies	S1	1296662	Viruses	Brevibacillus phage Davies	0	0	0	0	1	0	0	0	1	0	0	0	0	1	0	0	0	0	0	0	0	0	0	0	0	0	0	0	2	0	0	0	0	0	0	0	0	0	0	0	0	0	0	0	0
root|Viruses|Duplodnaviria|Heunggongvirae|Uroviricota|Caudoviricetes|Caudovirales|Myoviridae|Acionnavirus	G	2733086	Viruses	Acionnavirus	9	6	6	8	12	5	5	6	2	1	6	2	2	12	1	1	6	6	3	0	0	1	0	0	1	0	1	3	4	1	0	4	1	1	0	0	0	2	0	0	0	0	0	0	0
root|Viruses|Duplodnaviria|Heunggongvirae|Uroviricota|Caudoviricetes|Caudovirales|Myoviridae|Acionnavirus|Synechococcus virus SMbCM100	S	2734078	Viruses	Synechococcus virus SMbCM100	4	1	1	1	5	1	0	3	1	0	2	1	2	7	0	0	0	4	0	0	0	0	0	0	0	0	1	0	2	0	0	0	0	1	0	0	0	2	0	0	0	0	0	0	0
root|Viruses|Duplodnaviria|Heunggongvirae|Uroviricota|Caudoviricetes|Caudovirales|Myoviridae|Acionnavirus|Synechococcus virus SMbCM100|Synechococcus phage S-MbCM100	S1	1340812	Viruses	Synechococcus phage S-MbCM100	4	1	1	1	5	1	0	3	1	0	2	1	2	7	0	0	0	4	0	0	0	0	0	0	0	0	1	0	2	0	0	0	0	1	0	0	0	2	0	0	0	0	0	0	0
root|Viruses|Duplodnaviria|Heunggongvirae|Uroviricota|Caudoviricetes|Caudovirales|Myoviridae|Acionnavirus|unclassified Acionnavirus	G1	2752794	Viruses	unclassified Acionnavirus	5	5	5	7	7	4	5	3	1	1	4	1	0	5	1	1	6	2	3	0	0	1	0	0	1	0	0	3	2	1	0	4	1	0	0	0	0	0	0	0	0	0	0	0	0
root|Viruses|Duplodnaviria|Heunggongvirae|Uroviricota|Caudoviricetes|Caudovirales|Myoviridae|Acionnavirus|unclassified Acionnavirus|Synechococcus phage ACG-2014b	S	1493508	Viruses	Synechococcus phage ACG-2014b	3	2	4	1	3	4	2	3	0	1	0	0	0	1	0	1	2	0	0	0	0	1	0	0	0	0	0	0	0	0	0	2	0	0	0	0	0	0	0	0	0	0	0	0	0
root|Viruses|Duplodnaviria|Heunggongvirae|Uroviricota|Caudoviricetes|Caudovirales|Myoviridae|Acionnavirus|unclassified Acionnavirus|Synechococcus phage ACG-2014c	S	1079998	Viruses	Synechococcus phage ACG-2014c	0	0	0	2	0	0	0	0	1	0	2	0	0	1	0	0	0	0	0	0	0	0	0	0	0	0	0	2	2	0	0	1	0	0	0	0	0	0	0	0	0	0	0	0	0
root|Viruses|Duplodnaviria|Heunggongvirae|Uroviricota|Caudoviricetes|Caudovirales|Myoviridae|Acionnavirus|unclassified Acionnavirus|Synechococcus phage ACG-2014g	S	1493512	Viruses	Synechococcus phage ACG-2014g	2	3	0	3	0	0	2	0	0	0	0	0	0	0	1	0	1	1	3	0	0	0	0	0	1	0	0	0	0	1	0	0	1	0	0	0	0	0	0	0	0	0	0	0	0
root|Viruses|Duplodnaviria|Heunggongvirae|Uroviricota|Caudoviricetes|Caudovirales|Myoviridae|Acionnavirus|unclassified Acionnavirus|Synechococcus phage S-CAM8	S	754038	Viruses	Synechococcus phage S-CAM8	0	0	1	1	4	0	1	0	0	0	2	1	0	3	0	0	3	1	0	0	0	0	0	0	0	0	0	1	0	0	0	1	0	0	0	0	0	0	0	0	0	0	0	0	0
root|Viruses|Duplodnaviria|Heunggongvirae|Uroviricota|Caudoviricetes|Caudovirales|Myoviridae|Agricanvirus	G	1984776	Viruses	Agricanvirus	5	6	6	5	8	11	13	3	2	4	6	4	3	29	4	7	5	3	2	1	0	0	2	0	0	4	2	6	1	1	0	2	0	0	2	2	2	0	1	1	0	6	2	0	0
root|Viruses|Duplodnaviria|Heunggongvirae|Uroviricota|Caudoviricetes|Caudovirales|Myoviridae|Agricanvirus|Erwinia virus Deimos	S	1984777	Viruses	Erwinia virus Deimos	0	0	0	0	0	0	0	2	0	0	1	0	0	0	0	0	0	0	0	0	0	0	0	0	0	0	0	0	0	0	0	0	0	0	0	0	0	0	0	0	0	0	0	0	0
root|Viruses|Duplodnaviria|Heunggongvirae|Uroviricota|Caudoviricetes|Caudovirales|Myoviridae|Agricanvirus|Erwinia virus Deimos|Erwinia phage vB_EamM_Deimos-Minion	S1	1815986	Viruses	Erwinia phage vB_EamM_Deimos-Minion	0	0	0	0	0	0	0	2	0	0	1	0	0	0	0	0	0	0	0	0	0	0	0	0	0	0	0	0	0	0	0	0	0	0	0	0	0	0	0	0	0	0	0	0	0
root|Viruses|Duplodnaviria|Heunggongvirae|Uroviricota|Caudoviricetes|Caudovirales|Myoviridae|Agricanvirus|Erwinia virus Desertfox	S	2560433	Viruses	Erwinia virus Desertfox	0	0	1	0	0	0	0	0	0	0	0	1	1	1	0	1	0	1	0	0	0	0	0	0	0	0	0	1	0	0	0	0	0	0	0	0	1	0	0	0	0	0	0	0	0
root|Viruses|Duplodnaviria|Heunggongvirae|Uroviricota|Caudoviricetes|Caudovirales|Myoviridae|Agricanvirus|Erwinia virus Desertfox|Erwinia phage vB_EamM_Desertfox	S1	2060127	Viruses	Erwinia phage vB_EamM_Desertfox	0	0	1	0	0	0	0	0	0	0	0	1	1	1	0	1	0	1	0	0	0	0	0	0	0	0	0	1	0	0	0	0	0	0	0	0	1	0	0	0	0	0	0	0	0
root|Viruses|Duplodnaviria|Heunggongvirae|Uroviricota|Caudoviricetes|Caudovirales|Myoviridae|Agricanvirus|Erwinia virus Ea35-70	S	1984778	Viruses	Erwinia virus Ea35-70	0	0	3	1	1	1	1	0	0	0	0	0	0	0	0	0	1	1	1	0	0	0	1	0	0	0	0	2	0	0	0	0	0	0	0	0	0	0	1	0	0	0	0	0	0
root|Viruses|Duplodnaviria|Heunggongvirae|Uroviricota|Caudoviricetes|Caudovirales|Myoviridae|Agricanvirus|Erwinia virus Ea35-70|Erwinia phage Ea35-70	S1	1429768	Viruses	Erwinia phage Ea35-70	0	0	3	1	1	1	1	0	0	0	0	0	0	0	0	0	1	1	1	0	0	0	1	0	0	0	0	2	0	0	0	0	0	0	0	0	0	0	1	0	0	0	0	0	0
root|Viruses|Duplodnaviria|Heunggongvirae|Uroviricota|Caudoviricetes|Caudovirales|Myoviridae|Agricanvirus|Erwinia virus RAY	S	1984779	Viruses	Erwinia virus RAY	0	0	0	0	0	0	0	0	0	0	0	0	0	0	1	0	0	0	0	0	0	0	0	0	0	0	0	0	0	0	0	0	0	0	0	0	0	0	0	0	0	0	0	0	0
root|Viruses|Duplodnaviria|Heunggongvirae|Uroviricota|Caudoviricetes|Caudovirales|Myoviridae|Agricanvirus|Erwinia virus RAY|Erwinia phage vB_EamM_RAY	S1	1815987	Viruses	Erwinia phage vB_EamM_RAY	0	0	0	0	0	0	0	0	0	0	0	0	0	0	1	0	0	0	0	0	0	0	0	0	0	0	0	0	0	0	0	0	0	0	0	0	0	0	0	0	0	0	0	0	0
root|Viruses|Duplodnaviria|Heunggongvirae|Uroviricota|Caudoviricetes|Caudovirales|Myoviridae|Agricanvirus|Erwinia virus Simmy50	S	1984780	Viruses	Erwinia virus Simmy50	0	0	0	1	0	1	0	1	0	0	0	1	1	1	0	0	0	0	0	0	0	0	0	0	0	0	0	0	1	0	0	1	0	0	0	0	0	0	0	0	0	0	0	0	0
root|Viruses|Duplodnaviria|Heunggongvirae|Uroviricota|Caudoviricetes|Caudovirales|Myoviridae|Agricanvirus|Erwinia virus Simmy50|Erwinia phage vB_EamM_Simmy50	S1	1815988	Viruses	Erwinia phage vB_EamM_Simmy50	0	0	0	1	0	1	0	1	0	0	0	1	1	1	0	0	0	0	0	0	0	0	0	0	0	0	0	0	1	0	0	1	0	0	0	0	0	0	0	0	0	0	0	0	0
root|Viruses|Duplodnaviria|Heunggongvirae|Uroviricota|Caudoviricetes|Caudovirales|Myoviridae|Agricanvirus|Erwinia virus SpecialG	S	1984781	Viruses	Erwinia virus SpecialG	3	0	0	0	1	0	2	0	0	0	0	1	1	11	2	0	2	1	0	1	0	0	0	0	0	0	0	0	0	0	0	1	0	0	0	0	0	0	0	0	0	0	0	0	0
root|Viruses|Duplodnaviria|Heunggongvirae|Uroviricota|Caudoviricetes|Caudovirales|Myoviridae|Agricanvirus|Erwinia virus SpecialG|Erwinia phage vB_EamM_Special G	S1	1815989	Viruses	Erwinia phage vB_EamM_Special G	3	0	0	0	1	0	2	0	0	0	0	1	1	11	2	0	2	1	0	1	0	0	0	0	0	0	0	0	0	0	0	1	0	0	0	0	0	0	0	0	0	0	0	0	0
root|Viruses|Duplodnaviria|Heunggongvirae|Uroviricota|Caudoviricetes|Caudovirales|Myoviridae|Ahtivirus	G	2733087	Viruses	Ahtivirus	2	0	3	1	1	0	0	4	1	1	1	0	3	2	1	0	1	2	0	0	0	0	0	0	1	0	3	0	0	0	0	1	0	0	0	1	0	0	0	0	0	0	0	0	1
root|Viruses|Duplodnaviria|Heunggongvirae|Uroviricota|Caudoviricetes|Caudovirales|Myoviridae|Ahtivirus|Synechococcus virus SShM2	S	2734079	Viruses	Synechococcus virus SShM2	2	0	3	1	1	0	0	4	1	1	1	0	3	2	1	0	1	2	0	0	0	0	0	0	1	0	3	0	0	0	0	1	0	0	0	1	0	0	0	0	0	0	0	0	1
root|Viruses|Duplodnaviria|Heunggongvirae|Uroviricota|Caudoviricetes|Caudovirales|Myoviridae|Ahtivirus|Synechococcus virus SShM2|Synechococcus phage S-ShM2	S1	445683	Viruses	Synechococcus phage S-ShM2	2	0	3	1	1	0	0	4	1	1	1	0	3	2	1	0	1	2	0	0	0	0	0	0	1	0	3	0	0	0	0	1	0	0	0	1	0	0	0	0	0	0	0	0	1
root|Viruses|Duplodnaviria|Heunggongvirae|Uroviricota|Caudoviricetes|Caudovirales|Myoviridae|Alcyoneusvirus	G	2560086	Viruses	Alcyoneusvirus	6	6	9	4	1	3	5	4	0	1	11	3	0	7	1	6	4	13	2	9	0	1	1	1	1	5	12	3	4	3	3	65	32	40	2	52	33	5	1	11	8	51	1	3	24
root|Viruses|Duplodnaviria|Heunggongvirae|Uroviricota|Caudoviricetes|Caudovirales|Myoviridae|Alcyoneusvirus|Klebsiella virus K64-1	S	2560541	Viruses	Klebsiella virus K64-1	1	0	3	0	0	0	0	0	0	1	1	1	0	3	0	1	1	2	1	0	0	0	0	0	0	0	0	1	0	1	0	3	0	0	0	0	3	0	0	0	0	0	0	0	0
root|Viruses|Duplodnaviria|Heunggongvirae|Uroviricota|Caudoviricetes|Caudovirales|Myoviridae|Alcyoneusvirus|Klebsiella virus K64-1|Klebsiella phage K64-1	S1	1439894	Viruses	Klebsiella phage K64-1	1	0	3	0	0	0	0	0	0	1	1	1	0	3	0	1	1	2	1	0	0	0	0	0	0	0	0	1	0	1	0	3	0	0	0	0	3	0	0	0	0	0	0	0	0
root|Viruses|Duplodnaviria|Heunggongvirae|Uroviricota|Caudoviricetes|Caudovirales|Myoviridae|Alcyoneusvirus|Klebsiella virus RaK2	S	2560545	Viruses	Klebsiella virus RaK2	2	1	3	1	1	2	4	0	0	0	3	0	0	2	0	0	1	1	0	1	0	0	0	1	0	0	1	1	0	0	1	1	0	0	0	0	1	0	0	0	1	0	0	0	0
root|Viruses|Duplodnaviria|Heunggongvirae|Uroviricota|Caudoviricetes|Caudovirales|Myoviridae|Alcyoneusvirus|Klebsiella virus RaK2|Klebsiella phage vB_KleM_RaK2	S1	1147094	Viruses	Klebsiella phage vB_KleM_RaK2	2	1	3	1	1	2	4	0	0	0	3	0	0	2	0	0	1	1	0	1	0	0	0	1	0	0	1	1	0	0	1	1	0	0	0	0	1	0	0	0	1	0	0	0	0
root|Viruses|Duplodnaviria|Heunggongvirae|Uroviricota|Caudoviricetes|Caudovirales|Myoviridae|Alexandravirus	G	2733088	Viruses	Alexandravirus	4	5	0	2	2	2	1	3	0	1	3	0	2	6	0	1	2	1	2	3	7	0	0	14	7	0	3	1	0	3	3	0	0	0	0	2	3	0	0	1	0	0	0	0	1
root|Viruses|Duplodnaviria|Heunggongvirae|Uroviricota|Caudoviricetes|Caudovirales|Myoviridae|Alexandravirus|Dickeya virus AD1	S	2734080	Viruses	Dickeya virus AD1	4	4	0	2	0	0	0	3	0	1	2	0	2	5	0	1	1	0	2	0	0	0	0	0	0	0	2	0	0	1	0	0	0	0	0	0	2	0	0	0	0	0	0	0	1
root|Viruses|Duplodnaviria|Heunggongvirae|Uroviricota|Caudoviricetes|Caudovirales|Myoviridae|Alexandravirus|Dickeya virus AD1|Dickeya phage vB_DsoM_AD1	S1	2283029	Viruses	Dickeya phage vB_DsoM_AD1	4	4	0	2	0	0	0	3	0	1	2	0	2	5	0	1	1	0	2	0	0	0	0	0	0	0	2	0	0	1	0	0	0	0	0	0	2	0	0	0	0	0	0	0	1
root|Viruses|Duplodnaviria|Heunggongvirae|Uroviricota|Caudoviricetes|Caudovirales|Myoviridae|Alexandravirus|Erwinia virus Alexandra	S	2734081	Viruses	Erwinia virus Alexandra	0	1	0	0	2	2	1	0	0	0	1	0	0	1	0	0	1	1	0	3	7	0	0	14	7	0	1	1	0	2	3	0	0	0	0	2	1	0	0	1	0	0	0	0	0
root|Viruses|Duplodnaviria|Heunggongvirae|Uroviricota|Caudoviricetes|Caudovirales|Myoviridae|Alexandravirus|Erwinia virus Alexandra|Erwinia phage vB_EamM_Alexandra	S1	2201424	Viruses	Erwinia phage vB_EamM_Alexandra	0	1	0	0	2	2	1	0	0	0	1	0	0	1	0	0	1	1	0	3	7	0	0	14	7	0	1	1	0	2	3	0	0	0	0	2	1	0	0	1	0	0	0	0	0
root|Viruses|Duplodnaviria|Heunggongvirae|Uroviricota|Caudoviricetes|Caudovirales|Myoviridae|Anamdongvirus	G	2733089	Viruses	Anamdongvirus	1	0	1	0	2	0	0	0	1	0	0	0	0	0	0	2	1	7	0	0	0	1	0	0	0	0	0	0	0	0	0	0	0	0	0	0	0	1	0	0	1	1	0	0	0
root|Viruses|Duplodnaviria|Heunggongvirae|Uroviricota|Caudoviricetes|Caudovirales|Myoviridae|Anamdongvirus|Lactobacillus virus LBR48	S	2734082	Viruses	Lactobacillus virus LBR48	1	0	1	0	2	0	0	0	1	0	0	0	0	0	0	2	1	7	0	0	0	1	0	0	0	0	0	0	0	0	0	0	0	0	0	0	0	1	0	0	1	1	0	0	0
root|Viruses|Duplodnaviria|Heunggongvirae|Uroviricota|Caudoviricetes|Caudovirales|Myoviridae|Anamdongvirus|Lactobacillus virus LBR48|Lactobacillus phage LBR48	S1	755164	Viruses	Lactobacillus phage LBR48	1	0	1	0	2	0	0	0	1	0	0	0	0	0	0	2	1	7	0	0	0	1	0	0	0	0	0	0	0	0	0	0	0	0	0	0	0	1	0	0	1	1	0	0	0
root|Viruses|Duplodnaviria|Heunggongvirae|Uroviricota|Caudoviricetes|Caudovirales|Myoviridae|Anaposvirus	G	2733090	Viruses	Anaposvirus	4	1	4	0	0	4	0	1	0	0	1	2	1	6	0	0	1	0	0	1	0	0	0	0	0	0	2	2	0	0	1	1	0	0	0	0	5	0	1	1	0	0	1	0	0
root|Viruses|Duplodnaviria|Heunggongvirae|Uroviricota|Caudoviricetes|Caudovirales|Myoviridae|Anaposvirus|Synechococcus virus SCAM1	S	2734083	Viruses	Synechococcus virus SCAM1	4	1	4	0	0	4	0	1	0	0	1	2	1	6	0	0	1	0	0	1	0	0	0	0	0	0	2	2	0	0	1	1	0	0	0	0	5	0	1	1	0	0	1	0	0
root|Viruses|Duplodnaviria|Heunggongvirae|Uroviricota|Caudoviricetes|Caudovirales|Myoviridae|Anaposvirus|Synechococcus virus SCAM1|Synechococcus phage S-CAM1	S1	754037	Viruses	Synechococcus phage S-CAM1	4	1	4	0	0	4	0	1	0	0	1	2	1	6	0	0	1	0	0	1	0	0	0	0	0	0	2	2	0	0	1	1	0	0	0	0	5	0	1	1	0	0	1	0	0
root|Viruses|Duplodnaviria|Heunggongvirae|Uroviricota|Caudoviricetes|Caudovirales|Myoviridae|Aokuangvirus	G	2733091	Viruses	Aokuangvirus	5	6	2	0	1	2	0	4	0	0	1	0	2	2	0	0	3	0	0	0	0	0	0	0	0	1	0	0	1	1	0	1	0	0	0	0	0	0	0	0	0	0	0	0	0
root|Viruses|Duplodnaviria|Heunggongvirae|Uroviricota|Caudoviricetes|Caudovirales|Myoviridae|Aokuangvirus|Synechococcus virus SCBWM1	S	2734084	Viruses	Synechococcus virus SCBWM1	5	6	2	0	1	2	0	4	0	0	1	0	2	2	0	0	3	0	0	0	0	0	0	0	0	1	0	0	1	1	0	1	0	0	0	0	0	0	0	0	0	0	0	0	0
root|Viruses|Duplodnaviria|Heunggongvirae|Uroviricota|Caudoviricetes|Caudovirales|Myoviridae|Aokuangvirus|Synechococcus virus SCBWM1|Synechococcus phage S-CBWM1	S1	2053653	Viruses	Synechococcus phage S-CBWM1	5	6	2	0	1	2	0	4	0	0	1	0	2	2	0	0	3	0	0	0	0	0	0	0	0	1	0	0	1	1	0	1	0	0	0	0	0	0	0	0	0	0	0	0	0
root|Viruses|Duplodnaviria|Heunggongvirae|Uroviricota|Caudoviricetes|Caudovirales|Myoviridae|Aphroditevirus	G	2560092	Viruses	Aphroditevirus	5	3	7	6	7	0	4	4	2	1	4	2	1	1	1	1	3	7	2	1	1	3	0	0	0	2	4	3	4	1	0	4	0	0	0	0	3	0	0	0	2	0	0	0	0
root|Viruses|Duplodnaviria|Heunggongvirae|Uroviricota|Caudoviricetes|Caudovirales|Myoviridae|Aphroditevirus|Vibrio virus Aphrodite1	S	2560831	Viruses	Vibrio virus Aphrodite1	0	1	3	1	1	0	0	0	0	0	0	1	0	0	0	0	0	0	0	0	0	1	0	0	0	0	0	0	0	0	0	0	0	0	0	0	0	0	0	0	0	0	0	0	0
root|Viruses|Duplodnaviria|Heunggongvirae|Uroviricota|Caudoviricetes|Caudovirales|Myoviridae|Aphroditevirus|Vibrio virus Aphrodite1|Vibrio phage Aphrodite1	S1	2070057	Viruses	Vibrio phage Aphrodite1	0	1	3	1	1	0	0	0	0	0	0	1	0	0	0	0	0	0	0	0	0	1	0	0	0	0	0	0	0	0	0	0	0	0	0	0	0	0	0	0	0	0	0	0	0
root|Viruses|Duplodnaviria|Heunggongvirae|Uroviricota|Caudoviricetes|Caudovirales|Myoviridae|Aphroditevirus|unclassified Aphroditevirus	G1	2594891	Viruses	unclassified Aphroditevirus	5	2	4	5	6	0	4	4	2	1	4	1	1	1	1	1	3	7	2	1	1	2	0	0	0	2	4	3	4	1	0	0	0	0	0	0	3	0	0	0	2	0	0	0	0
root|Viruses|Duplodnaviria|Heunggongvirae|Uroviricota|Caudoviricetes|Caudovirales|Myoviridae|Aphroditevirus|unclassified Aphroditevirus|Photobacterium phage PDCC-1	S	2664246	Viruses	Photobacterium phage PDCC-1	1	0	2	2	1	0	0	2	0	0	0	0	1	0	0	1	0	2	1	0	0	0	0	0	0	0	2	1	0	0	0	0	0	0	0	0	0	0	0	0	0	0	0	0	0
root|Viruses|Duplodnaviria|Heunggongvirae|Uroviricota|Caudoviricetes|Caudovirales|Myoviridae|Aphroditevirus|unclassified Aphroditevirus|Vibrio phage 2 TSL-2019	S	2508172	Viruses	Vibrio phage 2 TSL-2019	0	1	0	1	2	0	2	1	0	1	1	1	0	0	0	0	2	0	0	0	0	1	0	0	0	0	2	0	2	0	0	0	0	0	0	0	1	0	0	0	0	0	0	0	0
root|Viruses|Duplodnaviria|Heunggongvirae|Uroviricota|Caudoviricetes|Caudovirales|Myoviridae|Aphroditevirus|unclassified Aphroditevirus|Vibrio phage USC-1	S	2592615	Viruses	Vibrio phage USC-1	1	1	1	1	2	0	2	1	0	0	1	0	0	1	1	0	1	1	0	0	0	1	0	0	0	2	0	1	1	1	0	0	0	0	0	0	1	0	0	0	2	0	0	0	0
root|Viruses|Duplodnaviria|Heunggongvirae|Uroviricota|Caudoviricetes|Caudovirales|Myoviridae|Asteriusvirus	G	2560094	Viruses	Asteriusvirus	99	124	84	39	57	159	80	78	89	56	68	83	136	76	10	24	60	64	12	4	5	50	5	6	5	65	73	51	20	62	1	17	2	3	2	3	29	2	1	7	10	9	22	3	7
root|Viruses|Duplodnaviria|Heunggongvirae|Uroviricota|Caudoviricetes|Caudovirales|Myoviridae|Asteriusvirus|Escherichia virus 121Q	S	2560436	Viruses	Escherichia virus 121Q	97	119	82	36	54	158	75	71	88	54	65	82	135	72	10	24	57	62	12	4	5	48	5	6	4	65	71	49	18	62	1	13	0	0	1	3	23	1	1	5	10	7	21	1	6
root|Viruses|Duplodnaviria|Heunggongvirae|Uroviricota|Caudoviricetes|Caudovirales|Myoviridae|Asteriusvirus|Escherichia virus 121Q|Escherichia phage 121Q	S1	1555202	Viruses	Escherichia phage 121Q	97	119	82	36	54	158	75	71	88	54	65	82	135	72	10	24	57	62	12	4	5	48	5	6	4	65	71	49	18	62	1	13	0	0	1	3	23	1	1	5	10	7	21	1	6
root|Viruses|Duplodnaviria|Heunggongvirae|Uroviricota|Caudoviricetes|Caudovirales|Myoviridae|Asteriusvirus|Escherichia virus PBECO4	S	2560463	Viruses	Escherichia virus PBECO4	0	1	2	0	2	0	3	2	1	1	0	0	0	1	0	0	1	1	0	0	0	0	0	0	0	0	2	0	0	0	0	1	1	0	0	0	5	0	0	2	0	1	0	0	0
root|Viruses|Duplodnaviria|Heunggongvirae|Uroviricota|Caudoviricetes|Caudovirales|Myoviridae|Asteriusvirus|Escherichia virus PBECO4|Escherichia phage PBECO4	S1	1273738	Viruses	Escherichia phage PBECO4	0	1	2	0	2	0	3	2	1	1	0	0	0	1	0	0	1	1	0	0	0	0	0	0	0	0	2	0	0	0	0	1	1	0	0	0	5	0	0	2	0	1	0	0	0
root|Viruses|Duplodnaviria|Heunggongvirae|Uroviricota|Caudoviricetes|Caudovirales|Myoviridae|Aurunvirus	G	2733093	Viruses	Aurunvirus	0	2	2	4	2	1	2	2	1	1	1	0	0	1	1	0	0	2	0	0	0	1	0	0	0	1	0	0	0	1	0	2	2	2	0	0	0	0	1	0	0	1	0	0	0
root|Viruses|Duplodnaviria|Heunggongvirae|Uroviricota|Caudoviricetes|Caudovirales|Myoviridae|Aurunvirus|Synechococcus virus STIM5	S	2734088	Viruses	Synechococcus virus STIM5	0	2	2	4	2	1	2	2	1	1	1	0	0	1	1	0	0	2	0	0	0	1	0	0	0	1	0	0	0	1	0	2	2	2	0	0	0	0	1	0	0	1	0	0	0
root|Viruses|Duplodnaviria|Heunggongvirae|Uroviricota|Caudoviricetes|Caudovirales|Myoviridae|Aurunvirus|Synechococcus virus STIM5|Cyanophage S-TIM5	S1	1137745	Viruses	Cyanophage S-TIM5	0	2	2	4	2	1	2	2	1	1	1	0	0	1	1	0	0	2	0	0	0	1	0	0	0	1	0	0	0	1	0	2	2	2	0	0	0	0	1	0	0	1	0	0	0
root|Viruses|Duplodnaviria|Heunggongvirae|Uroviricota|Caudoviricetes|Caudovirales|Myoviridae|Bacillus virus G	S	1084719	Viruses	Bacillus virus G	13	14	11	10	19	12	21	12	9	10	7	9	8	9	3	5	9	9	3	46	0	3	14	19	1	5	5	10	8	4	2	17	30	37	1	12	9	1	1	64	11	18	1	1	1
root|Viruses|Duplodnaviria|Heunggongvirae|Uroviricota|Caudoviricetes|Caudovirales|Myoviridae|Bacillus virus PBS1	S	10683	Viruses	Bacillus virus PBS1	0	0	3	0	0	0	0	0	0	0	2	1	0	3	0	0	0	2	0	0	0	0	0	0	0	0	0	3	0	1	0	0	0	0	1	0	0	0	0	0	0	0	0	0	0
root|Viruses|Duplodnaviria|Heunggongvirae|Uroviricota|Caudoviricetes|Caudovirales|Myoviridae|Baikalvirus	G	2733094	Viruses	Baikalvirus	0	0	2	1	2	2	3	3	0	0	0	0	0	0	1	1	1	4	1	0	1	3	0	0	0	0	1	2	0	2	0	0	0	0	0	1	0	0	1	0	0	1	0	0	0
root|Viruses|Duplodnaviria|Heunggongvirae|Uroviricota|Caudoviricetes|Caudovirales|Myoviridae|Baikalvirus|Pseudomonas virus PaBG	S	2734089	Viruses	Pseudomonas virus PaBG	0	0	2	1	2	2	3	3	0	0	0	0	0	0	1	1	1	4	1	0	1	3	0	0	0	0	1	2	0	2	0	0	0	0	0	1	0	0	1	0	0	1	0	0	0
root|Viruses|Duplodnaviria|Heunggongvirae|Uroviricota|Caudoviricetes|Caudovirales|Myoviridae|Baikalvirus|Pseudomonas virus PaBG|Pseudomonas phage PaBG	S1	1335230	Viruses	Pseudomonas phage PaBG	0	0	2	1	2	2	3	3	0	0	0	0	0	0	1	1	1	4	1	0	1	3	0	0	0	0	1	2	0	2	0	0	0	0	0	1	0	0	1	0	0	1	0	0	0
root|Viruses|Duplodnaviria|Heunggongvirae|Uroviricota|Caudoviricetes|Caudovirales|Myoviridae|Barbavirus	G	2733095	Viruses	Barbavirus	1	1	0	2	0	0	1	0	0	0	0	0	1	0	0	1	1	1	2	0	0	1	0	0	0	0	0	0	0	0	0	2	0	0	0	0	0	0	0	0	0	0	0	0	0
root|Viruses|Duplodnaviria|Heunggongvirae|Uroviricota|Caudoviricetes|Caudovirales|Myoviridae|Barbavirus|Rheinheimera virus Barba19A	S	2734091	Viruses	Rheinheimera virus Barba19A	0	0	0	0	0	0	1	0	0	0	0	0	0	0	0	0	1	1	0	0	0	0	0	0	0	0	0	0	0	0	0	0	0	0	0	0	0	0	0	0	0	0	0	0	0
root|Viruses|Duplodnaviria|Heunggongvirae|Uroviricota|Caudoviricetes|Caudovirales|Myoviridae|Barbavirus|Rheinheimera virus Barba19A|Rheinheimera phage vB_RspM_Barba19A	S1	2565658	Viruses	Rheinheimera phage vB_RspM_Barba19A	0	0	0	0	0	0	1	0	0	0	0	0	0	0	0	0	1	1	0	0	0	0	0	0	0	0	0	0	0	0	0	0	0	0	0	0	0	0	0	0	0	0	0	0	0
root|Viruses|Duplodnaviria|Heunggongvirae|Uroviricota|Caudoviricetes|Caudovirales|Myoviridae|Bcepmuvirus	G	1198139	Viruses	Bcepmuvirus	0	0	0	0	0	1	7	0	0	0	0	0	0	0	0	0	0	1	0	1	0	0	0	0	0	0	0	0	0	0	0	0	0	0	0	0	0	0	0	1	0	0	0	0	0
root|Viruses|Duplodnaviria|Heunggongvirae|Uroviricota|Caudoviricetes|Caudovirales|Myoviridae|Bcepmuvirus|Burkholderia virus phiE255	S	431894	Viruses	Burkholderia virus phiE255	0	0	0	0	0	1	7	0	0	0	0	0	0	0	0	0	0	1	0	1	0	0	0	0	0	0	0	0	0	0	0	0	0	0	0	0	0	0	0	1	0	0	0	0	0
root|Viruses|Duplodnaviria|Heunggongvirae|Uroviricota|Caudoviricetes|Caudovirales|Myoviridae|Bellamyvirus	G	2733096	Viruses	Bellamyvirus	2	1	6	3	2	2	2	0	0	3	1	2	1	4	0	0	6	2	4	0	0	0	0	1	0	0	0	3	0	2	0	1	1	0	0	0	1	0	2	0	0	1	0	1	0
root|Viruses|Duplodnaviria|Heunggongvirae|Uroviricota|Caudoviricetes|Caudovirales|Myoviridae|Bellamyvirus|Synechococcus virus Bellamy	S	2734095	Viruses	Synechococcus virus Bellamy	1	1	2	2	0	1	2	0	0	2	1	0	0	3	0	0	2	1	2	0	0	0	0	1	0	0	0	2	0	1	0	1	1	0	0	0	1	0	2	0	0	1	0	0	0
root|Viruses|Duplodnaviria|Heunggongvirae|Uroviricota|Caudoviricetes|Caudovirales|Myoviridae|Bellamyvirus|Synechococcus virus Bellamy|Synechococcus phage Bellamy	S1	2023996	Viruses	Synechococcus phage Bellamy	1	1	2	2	0	1	2	0	0	2	1	0	0	3	0	0	2	1	2	0	0	0	0	1	0	0	0	2	0	1	0	1	1	0	0	0	1	0	2	0	0	1	0	0	0
root|Viruses|Duplodnaviria|Heunggongvirae|Uroviricota|Caudoviricetes|Caudovirales|Myoviridae|Bellamyvirus|unclassified Bellamyvirus	G1	2752547	Viruses	unclassified Bellamyvirus	1	0	4	1	2	1	0	0	0	1	0	2	1	1	0	0	4	1	2	0	0	0	0	0	0	0	0	1	0	1	0	0	0	0	0	0	0	0	0	0	0	0	0	1	0
root|Viruses|Duplodnaviria|Heunggongvirae|Uroviricota|Caudoviricetes|Caudovirales|Myoviridae|Bellamyvirus|unclassified Bellamyvirus|Synechococcus phage S-SM2	S	444860	Viruses	Synechococcus phage S-SM2	1	0	4	1	2	1	0	0	0	1	0	2	1	1	0	0	4	1	2	0	0	0	0	0	0	0	0	1	0	1	0	0	0	0	0	0	0	0	0	0	0	0	0	1	0
root|Viruses|Duplodnaviria|Heunggongvirae|Uroviricota|Caudoviricetes|Caudovirales|Myoviridae|Bendigovirus	G	2560099	Viruses	Bendigovirus	0	0	0	0	0	0	2	1	0	0	0	0	0	0	0	2	0	0	0	0	0	0	0	0	0	1	2	0	0	0	0	0	0	0	0	0	0	0	0	0	0	0	0	0	1
root|Viruses|Duplodnaviria|Heunggongvirae|Uroviricota|Caudoviricetes|Caudovirales|Myoviridae|Bendigovirus|Gordonia virus GMA6	S	2560495	Viruses	Gordonia virus GMA6	0	0	0	0	0	0	2	1	0	0	0	0	0	0	0	2	0	0	0	0	0	0	0	0	0	1	2	0	0	0	0	0	0	0	0	0	0	0	0	0	0	0	0	0	1
root|Viruses|Duplodnaviria|Heunggongvirae|Uroviricota|Caudoviricetes|Caudovirales|Myoviridae|Bendigovirus|Gordonia virus GMA6|Gordonia phage GMA6	S1	1647285	Viruses	Gordonia phage GMA6	0	0	0	0	0	0	2	1	0	0	0	0	0	0	0	2	0	0	0	0	0	0	0	0	0	1	2	0	0	0	0	0	0	0	0	0	0	0	0	0	0	0	0	0	1
root|Viruses|Duplodnaviria|Heunggongvirae|Uroviricota|Caudoviricetes|Caudovirales|Myoviridae|Biquartavirus	G	1912143	Viruses	Biquartavirus	1	0	3	0	2	1	2	1	0	1	0	0	0	2	0	0	0	1	0	0	0	1	2	0	0	0	0	0	1	0	0	0	0	0	0	0	0	0	0	0	0	0	0	0	0
root|Viruses|Duplodnaviria|Heunggongvirae|Uroviricota|Caudoviricetes|Caudovirales|Myoviridae|Biquartavirus|Aeromonas virus 44RR2	S	115987	Viruses	Aeromonas virus 44RR2	0	0	1	0	0	1	1	1	0	0	0	0	0	0	0	0	0	1	0	0	0	1	0	0	0	0	0	0	0	0	0	0	0	0	0	0	0	0	0	0	0	0	0	0	0
root|Viruses|Duplodnaviria|Heunggongvirae|Uroviricota|Caudoviricetes|Caudovirales|Myoviridae|Biquartavirus|unclassified Biquartavirus	G1	2562339	Viruses	unclassified Biquartavirus	0	0	0	0	1	0	1	0	0	0	0	0	0	0	0	0	0	0	0	0	0	0	2	0	0	0	0	0	0	0	0	0	0	0	0	0	0	0	0	0	0	0	0	0	0
root|Viruses|Duplodnaviria|Heunggongvirae|Uroviricota|Caudoviricetes|Caudovirales|Myoviridae|Biquartavirus|unclassified Biquartavirus|Aeromonas virus 31	S	321023	Viruses	Aeromonas virus 31	0	0	0	0	1	0	1	0	0	0	0	0	0	0	0	0	0	0	0	0	0	0	2	0	0	0	0	0	0	0	0	0	0	0	0	0	0	0	0	0	0	0	0	0	0
root|Viruses|Duplodnaviria|Heunggongvirae|Uroviricota|Caudoviricetes|Caudovirales|Myoviridae|Bixzunavirus	G	680114	Viruses	Bixzunavirus	12	6	14	5	5	8	8	8	2	1	5	35	3	3	2	6	8	11	1	10	2	17	1	5	6	5	3	6	3	4	1	1	0	0	2	0	1	0	2	6	5	3	1	0	0
root|Viruses|Duplodnaviria|Heunggongvirae|Uroviricota|Caudoviricetes|Caudovirales|Myoviridae|Bixzunavirus|Mycobacterium virus Alice	S	2006133	Viruses	Mycobacterium virus Alice	0	1	0	1	0	1	0	0	0	0	0	0	0	0	0	0	0	0	0	0	0	0	0	0	0	0	0	1	0	0	0	0	0	0	0	0	0	0	0	0	0	0	0	0	0
root|Viruses|Duplodnaviria|Heunggongvirae|Uroviricota|Caudoviricetes|Caudovirales|Myoviridae|Bixzunavirus|Mycobacterium virus Alice|Mycobacterium phage Alice	S1	1034128	Viruses	Mycobacterium phage Alice	0	1	0	1	0	1	0	0	0	0	0	0	0	0	0	0	0	0	0	0	0	0	0	0	0	0	0	1	0	0	0	0	0	0	0	0	0	0	0	0	0	0	0	0	0
root|Viruses|Duplodnaviria|Heunggongvirae|Uroviricota|Caudoviricetes|Caudovirales|Myoviridae|Bixzunavirus|Mycobacterium virus Bxz1	S	2006134	Viruses	Mycobacterium virus Bxz1	1	0	1	1	1	0	0	1	0	0	0	0	0	2	0	0	1	1	0	0	0	0	0	0	1	0	0	3	1	0	0	0	0	0	0	0	1	0	1	0	1	0	0	0	0
root|Viruses|Duplodnaviria|Heunggongvirae|Uroviricota|Caudoviricetes|Caudovirales|Myoviridae|Bixzunavirus|Mycobacterium virus Bxz1|Mycobacterium phage Astraea	S1	1327762	Viruses	Mycobacterium phage Astraea	0	0	0	0	1	0	0	0	0	0	0	0	0	1	0	0	0	0	0	0	0	0	0	0	0	0	0	0	0	0	0	0	0	0	0	0	0	0	0	0	0	0	0	0	0
root|Viruses|Duplodnaviria|Heunggongvirae|Uroviricota|Caudoviricetes|Caudovirales|Myoviridae|Bixzunavirus|Mycobacterium virus Bxz1|Mycobacterium phage Bxz1	S1	205877	Viruses	Mycobacterium phage Bxz1	0	0	0	0	0	0	0	0	0	0	0	0	0	0	0	0	0	1	0	0	0	0	0	0	0	0	0	0	0	0	0	0	0	0	0	0	0	0	0	0	0	0	0	0	0
root|Viruses|Duplodnaviria|Heunggongvirae|Uroviricota|Caudoviricetes|Caudovirales|Myoviridae|Bixzunavirus|Mycobacterium virus Bxz1|Mycobacterium phage Cali	S1	546803	Viruses	Mycobacterium phage Cali	1	0	0	0	0	0	0	0	0	0	0	0	0	0	0	0	1	0	0	0	0	0	0	0	0	0	0	1	0	0	0	0	0	0	0	0	0	0	1	0	0	0	0	0	0
root|Viruses|Duplodnaviria|Heunggongvirae|Uroviricota|Caudoviricetes|Caudovirales|Myoviridae|Bixzunavirus|Mycobacterium virus Bxz1|Mycobacterium phage ET08	S1	663554	Viruses	Mycobacterium phage ET08	0	0	0	0	0	0	0	0	0	0	0	0	0	0	0	0	0	0	0	0	0	0	0	0	1	0	0	0	0	0	0	0	0	0	0	0	0	0	0	0	0	0	0	0	0
root|Viruses|Duplodnaviria|Heunggongvirae|Uroviricota|Caudoviricetes|Caudovirales|Myoviridae|Bixzunavirus|Mycobacterium virus Bxz1|Mycobacterium phage ScottMcG	S1	546807	Viruses	Mycobacterium phage ScottMcG	0	0	0	0	0	0	0	0	0	0	0	0	0	0	0	0	0	0	0	0	0	0	0	0	0	0	0	1	1	0	0	0	0	0	0	0	0	0	0	0	0	0	0	0	0
root|Viruses|Duplodnaviria|Heunggongvirae|Uroviricota|Caudoviricetes|Caudovirales|Myoviridae|Bixzunavirus|Mycobacterium virus Dandelion	S	2006135	Viruses	Mycobacterium virus Dandelion	0	0	0	0	0	0	0	0	0	0	0	0	0	0	0	0	0	0	0	0	0	1	0	0	0	3	0	0	0	0	0	0	0	0	0	0	0	0	0	0	0	0	0	0	0
root|Viruses|Duplodnaviria|Heunggongvirae|Uroviricota|Caudoviricetes|Caudovirales|Myoviridae|Bixzunavirus|Mycobacterium virus Dandelion|Mycobacterium phage Dandelion	S1	1074305	Viruses	Mycobacterium phage Dandelion	0	0	0	0	0	0	0	0	0	0	0	0	0	0	0	0	0	0	0	0	0	1	0	0	0	3	0	0	0	0	0	0	0	0	0	0	0	0	0	0	0	0	0	0	0
root|Viruses|Duplodnaviria|Heunggongvirae|Uroviricota|Caudoviricetes|Caudovirales|Myoviridae|Bixzunavirus|Mycobacterium virus Nappy	S	2006138	Viruses	Mycobacterium virus Nappy	0	0	0	0	1	0	0	0	0	0	1	0	0	0	0	0	0	0	0	0	0	0	0	0	1	0	0	0	0	0	0	0	0	0	0	0	0	0	0	0	0	0	0	0	0
root|Viruses|Duplodnaviria|Heunggongvirae|Uroviricota|Caudoviricetes|Caudovirales|Myoviridae|Bixzunavirus|Mycobacterium virus Nappy|Mycobacterium phage Nappy	S1	1088866	Viruses	Mycobacterium phage Nappy	0	0	0	0	1	0	0	0	0	0	1	0	0	0	0	0	0	0	0	0	0	0	0	0	1	0	0	0	0	0	0	0	0	0	0	0	0	0	0	0	0	0	0	0	0
root|Viruses|Duplodnaviria|Heunggongvirae|Uroviricota|Caudoviricetes|Caudovirales|Myoviridae|Bixzunavirus|unclassified Bixzunavirus	G1	1133560	Viruses	unclassified Bixzunavirus	4	1	1	0	0	3	3	2	0	0	1	0	1	0	0	0	2	4	0	0	0	0	0	0	1	0	1	0	1	0	1	0	0	0	1	0	0	0	1	0	0	0	0	0	0
root|Viruses|Duplodnaviria|Heunggongvirae|Uroviricota|Caudoviricetes|Caudovirales|Myoviridae|Bixzunavirus|unclassified Bixzunavirus|Mycobacterium phage Tonenili	S	1891703	Viruses	Mycobacterium phage Tonenili	4	1	1	0	0	3	3	2	0	0	1	0	1	0	0	0	2	4	0	0	0	0	0	0	1	0	1	0	1	0	1	0	0	0	1	0	0	0	1	0	0	0	0	0	0
root|Viruses|Duplodnaviria|Heunggongvirae|Uroviricota|Caudoviricetes|Caudovirales|Myoviridae|Brigitvirus	G	2733097	Viruses	Brigitvirus	3	1	0	1	0	1	1	4	1	0	4	2	0	2	0	1	0	1	0	0	0	0	0	0	0	0	0	0	3	0	0	0	0	0	1	0	1	0	0	2	0	0	0	0	0
root|Viruses|Duplodnaviria|Heunggongvirae|Uroviricota|Caudoviricetes|Caudovirales|Myoviridae|Brigitvirus|Faecalibacterium virus Brigit	S	2734096	Viruses	Faecalibacterium virus Brigit	3	1	0	1	0	1	1	4	1	0	4	2	0	2	0	1	0	1	0	0	0	0	0	0	0	0	0	0	3	0	0	0	0	0	1	0	1	0	0	2	0	0	0	0	0
root|Viruses|Duplodnaviria|Heunggongvirae|Uroviricota|Caudoviricetes|Caudovirales|Myoviridae|Brigitvirus|Faecalibacterium virus Brigit|Faecalibacterium phage FP_Brigit	S1	2070181	Viruses	Faecalibacterium phage FP_Brigit	3	1	0	1	0	1	1	4	1	0	4	2	0	2	0	1	0	1	0	0	0	0	0	0	0	0	0	0	3	0	0	0	0	0	1	0	1	0	0	2	0	0	0	0	0
root|Viruses|Duplodnaviria|Heunggongvirae|Uroviricota|Caudoviricetes|Caudovirales|Myoviridae|Brizovirus	G	2733098	Viruses	Brizovirus	0	1	5	3	3	0	4	2	0	2	2	0	2	1	1	0	0	3	1	0	0	1	0	0	0	0	0	1	0	0	0	1	0	0	0	0	2	0	0	0	0	0	1	0	0
root|Viruses|Duplodnaviria|Heunggongvirae|Uroviricota|Caudoviricetes|Caudovirales|Myoviridae|Brizovirus|Prochlorococcus virus Syn33	S	2734097	Viruses	Prochlorococcus virus Syn33	0	0	0	0	0	0	0	0	0	0	0	0	0	0	0	0	0	0	0	0	0	1	0	0	0	0	0	0	0	0	0	0	0	0	0	0	0	0	0	0	0	0	0	0	0
root|Viruses|Duplodnaviria|Heunggongvirae|Uroviricota|Caudoviricetes|Caudovirales|Myoviridae|Brizovirus|Prochlorococcus virus Syn33|Prochlorococcus phage Syn33	S1	444878	Viruses	Prochlorococcus phage Syn33	0	0	0	0	0	0	0	0	0	0	0	0	0	0	0	0	0	0	0	0	0	1	0	0	0	0	0	0	0	0	0	0	0	0	0	0	0	0	0	0	0	0	0	0	0
root|Viruses|Duplodnaviria|Heunggongvirae|Uroviricota|Caudoviricetes|Caudovirales|Myoviridae|Brizovirus|unclassified Brizovirus	G1	2752522	Viruses	unclassified Brizovirus	0	0	2	2	2	0	1	0	0	0	2	0	1	0	1	0	0	2	0	0	0	0	0	0	0	0	0	0	0	0	0	0	0	0	0	0	1	0	0	0	0	0	1	0	0
root|Viruses|Duplodnaviria|Heunggongvirae|Uroviricota|Caudoviricetes|Caudovirales|Myoviridae|Brizovirus|unclassified Brizovirus|Cyanophage S-RIM12	S	1278402	Viruses	Cyanophage S-RIM12	0	0	2	2	2	0	1	0	0	0	2	0	1	0	1	0	0	2	0	0	0	0	0	0	0	0	0	0	0	0	0	0	0	0	0	0	1	0	0	0	0	0	1	0	0
root|Viruses|Duplodnaviria|Heunggongvirae|Uroviricota|Caudoviricetes|Caudovirales|Myoviridae|Busanvirus	G	2560109	Viruses	Busanvirus	6	3	8	0	0	5	1	0	1	0	2	2	1	3	0	0	1	1	1	0	0	0	0	0	0	0	1	1	2	2	0	0	0	0	0	1	2	0	0	0	0	0	0	0	0
root|Viruses|Duplodnaviria|Heunggongvirae|Uroviricota|Caudoviricetes|Caudovirales|Myoviridae|Busanvirus|Acidovorax virus ACP17	S	2560261	Viruses	Acidovorax virus ACP17	6	3	8	0	0	5	1	0	1	0	2	2	1	3	0	0	1	1	1	0	0	0	0	0	0	0	1	1	2	2	0	0	0	0	0	1	2	0	0	0	0	0	0	0	0
root|Viruses|Duplodnaviria|Heunggongvirae|Uroviricota|Caudoviricetes|Caudovirales|Myoviridae|Busanvirus|Acidovorax virus ACP17|Acidovorax phage ACP17	S1	2010329	Viruses	Acidovorax phage ACP17	6	3	8	0	0	5	1	0	1	0	2	2	1	3	0	0	1	1	1	0	0	0	0	0	0	0	1	1	2	2	0	0	0	0	0	1	2	0	0	0	0	0	0	0	0
root|Viruses|Duplodnaviria|Heunggongvirae|Uroviricota|Caudoviricetes|Caudovirales|Myoviridae|Carpasinavirus	G	2733099	Viruses	Carpasinavirus	0	0	0	0	0	0	0	0	0	0	0	0	0	0	0	1	1	0	0	0	0	0	0	0	0	0	0	0	0	1	0	0	0	0	0	0	0	0	0	0	0	0	0	0	0
root|Viruses|Duplodnaviria|Heunggongvirae|Uroviricota|Caudoviricetes|Caudovirales|Myoviridae|Carpasinavirus|Xanthomonas virus Carpasina	S	2734101	Viruses	Xanthomonas virus Carpasina	0	0	0	0	0	0	0	0	0	0	0	0	0	0	0	0	0	0	0	0	0	0	0	0	0	0	0	0	0	0	0	0	0	0	0	0	0	0	0	0	0	0	0	0	0
root|Viruses|Duplodnaviria|Heunggongvirae|Uroviricota|Caudoviricetes|Caudovirales|Myoviridae|Carpasinavirus|Xanthomonas virus Carpasina|Xanthomonas phage Carpasina	S1	2163636	Viruses	Xanthomonas phage Carpasina	0	0	0	0	0	0	0	0	0	0	0	0	0	0	0	0	0	0	0	0	0	0	0	0	0	0	0	0	0	0	0	0	0	0	0	0	0	0	0	0	0	0	0	0	0
[truncated: 19,314 more rows]
[truncated: 4 more columns]

## Sheet: bracken_pylum
NCBI taxonomy ID	Taxon (long)	Domain	Taxon	C1	C2	C3	C4	C5	C6	C7	C8	C9	C10	C11	C12	C13	M1	M2	M3	M4	M5	M6	M7	M8	M9	M10	M11	M12	M13	M14	M15	M16	M17	S1	S2	S3	S4	S5	S6	S7	S8	S9	S10	S11	S12	S13	S14	S15	S16
[truncated: 71 more rows]
[truncated: 3 more columns]

[truncated: 3 more sheets: bracken_genera, bracken_species, bact_species_percent]
